# Supplementary material for: TCF7L1 promotes skin tumorigenesis independently of β-catenin through induction of LCN2
Source: eLife journal article supplement (doi:10.7554/elife.23242), 2017-05-03
Supplement: supp [file elife-23242-supp-v1.zip]

Archive with 11 entries (11 files):
- elife_poa_e23242_Figure_5_figure_supplement_1.pdf
- elife_poa_e23242_Figure_10_figure_supplement_3.pdf
- elife_poa_e23242_Figure_3_figure_supplement_1.pdf
- elife_poa_e23242_Figure_2_figure_supplement_2.pdf
- elife_poa_e23242_Figure_10_figure_supplement_1.pdf
- elife_poa_e23242_Figure_6_figure_supplement_2.pdf
- elife_poa_e23242_Figure_10_figure_supplement_2.pdf
- elife_poa_e23242_Figure_6_figure_supplement_1.pdf
- elife_poa_e23242_Figure_2_figure_supplement_1.pdf
- elife_poa_e23242_Supplementary_File_1.xlsx
- elife_poa_e23242_Figure_2_figure_supplement_3.pdf
