# Supplementary material for: TCF7L1 promotes skin tumorigenesis independently of β-catenin through induction of LCN2
Source: eLife journal article supplement (doi:10.7554/elife.23242), 2017-05-03
Supplement: supp [file elife-23242-supp-v1.zip › elife_poa_e23242_Supplementary_File_1.xlsx]

## Sheet: Diff expressed
			Tcf7l1/vector					Tcf7l1ΔN/vector					Tcf7l1ΔG/vector					Tcf7l1*/vector
Gene	Gene id	locus	Log2 FoldChange	P-value	Q-value	FoldChange	Significant	Log2 FoldChange	P-value	Q-value	FoldChange	Significant	Log2 FoldChange	P-value	Q-value	FoldChange	Significant	Log2 FoldChange	P-value	Q-value	FoldChange	Significant
LTA	XLOC_041977	6:31539361-31542101	7.32804	0.0002	0.00707433	160.679	yes	6.88126	0.0015	0.0215828	117.887	yes	2.82638	1	1	7.09292	no	1.67241	1	1	3.18747	no
CASP14	XLOC_024432	19:15160194-15169104	6.89506	0.0001	0.00393125	119.02	yes	5.70824	5e-05	0.00116756	52.2819	yes	5.54141	5e-05	0.00369973	46.5726	yes	1.67938	1	1	3.2029	no
LY6D	XLOC_049227	8:143866295-143893536	6.73846	0.0004	0.0123123	106.777	yes	8.31063	0.0002	0.00389186	317.504	yes	2.98797	1	1	7.93357	no	2.82209	1	1	7.07186	no
SAA2,SAA4	XLOC_009032	11:18252895-18270190	6.22204	5e-05	0.00217877	74.6484	yes	6.51792	5e-05	0.00116756	91.6409	yes	5.10957	5e-05	0.00369973	34.525	yes	2.37813	0.0034	0.162988	5.19862	no
LYNX1	XLOC_049226	8:143844533-143859640	6.13807	5e-05	0.00217877	70.4276	yes	8.35664	5e-05	0.00116756	327.793	yes	-0.939902	1	1	0.521268	no	0.912914	1	1	1.88284	no
RP11-329L6.1,SNORA76	XLOC_021335	17:62223329-62223836	5.68765	0.0004	0.0123123	51.541	yes	5.89113	0.0009	0.0140464	59.3481	yes	5.66715	0.0016	0.0608131	50.8139	no	4.52136	0.01565	0.38648	22.9649	no
H19,MIR675	XLOC_008792	11:2016405-2022700	5.5616	5e-05	0.00217877	47.229	yes	6.62964	5e-05	0.00116756	99.0194	yes	2.64629	5e-05	0.00369973	6.26055	yes	0.672726	0.301	0.999777	1.59408	no
PADI3	XLOC_000279	1:17575592-17610728	5.54828	0.0001	0.00393125	46.7949	yes	6.15013	5e-05	0.00116756	71.0188	yes	0.000263654	1	1	1.00018	no	1.00315	1	1	2.00437	no
CACNA1H	XLOC_018187	16:1203240-1275257	5.50991	5e-05	0.00217877	45.5668	yes	6.6451	5e-05	0.00116756	100.086	yes	0.120043	1	1	1.08677	no	-0.467055	1	1	0.72344	no
SBSN	XLOC_026026	19:36014268-36019253	5.48088	5e-05	0.00217877	44.659	yes	6.9565	5e-05	0.00116756	124.198	yes	1.82596	0.02355	0.304182	3.54543	no	0.198991	1	1	1.1479	no
KLHL30	XLOC_028466	2:239047360-239061825	5.05373	0.00205	0.044133	33.2142	yes	6.31123	0.0009	0.0140464	79.409	yes	0.954381	1	1	1.93775	no	-1.09421	1	1	0.468393	no
IL36G	XLOC_027550	2:113730779-113743220	5.00541	0.00225	0.0475888	32.1202	yes	4.31112	0.001	0.0153873	19.8507	yes	3.7717	0.00515	0.129786	13.6582	no	3.11351	1	1	8.65486	no
STEAP4	XLOC_046380	7:87834432-87936234	4.9579	0.00215	0.0458086	31.0797	yes	4.24657	0.00445	0.0521154	18.9821	no	3.6343	0.00615	0.143304	12.4175	no	0.980957	1	1	1.97377	no
S100A8	XLOC_004086	1:153362507-153363664	4.81834	5e-05	0.00217877	28.214	yes	3.84725	5e-05	0.00116756	14.3925	yes	4.40637	5e-05	0.00369973	21.2056	yes	1.5134	0.00045	0.04618	2.85482	yes
RRAD	XLOC_019991	16:66955581-66959547	4.80214	5e-05	0.00217877	27.899	yes	6.15544	5e-05	0.00116756	71.2807	yes	0.690455	0.07635	0.545789	1.61379	no	-0.0878923	0.8257	0.999777	0.940896	no
LCN2	XLOC_050249	9:130911349-130915734	4.79034	5e-05	0.00217877	27.6717	yes	4.9424	5e-05	0.00116756	30.7476	yes	3.74814	5e-05	0.00369973	13.437	yes	0.489232	0.2659	0.999777	1.4037	no
TNF	XLOC_041978	6:31543343-31546113	4.53669	5e-05	0.00217877	23.2102	yes	4.88069	5e-05	0.00116756	29.4601	yes	2.2994	5e-05	0.00369973	4.92253	yes	1.25562	0.01545	0.383592	2.3877	no
KISS1	XLOC_004624	1:204159468-204165614	4.40138	0.0002	0.00707433	21.1323	yes	5.50352	5e-05	0.00116756	45.3654	yes	3.31814	0.0002	0.0127624	9.97378	yes	2.37336	0.00305	0.151995	5.18146	no
IGF2,INS,INS-IGF2	XLOC_008793	11:2150341-2182571	4.39917	5e-05	0.00217877	21.1	yes	4.64406	5e-05	0.00116756	25.0035	yes	0.8496	1	1	1.802	no	0.833936	1	1	1.78254	no
TGM1	XLOC_015312	14:24718319-24733638	4.38827	5e-05	0.00217877	20.9412	yes	4.46259	5e-05	0.00116756	22.0482	yes	2.8809	5e-05	0.00369973	7.36609	yes	0.222579	0.62645	0.999777	1.16682	no
PADI1	XLOC_000278	1:17525911-17572500	4.341	5e-05	0.00217877	20.2661	yes	5.2118	5e-05	0.00116756	37.0602	yes	3.25005	5e-05	0.00369973	9.51399	yes	0.157175	1	1	1.1151	no
TPPP3	XLOC_020001	16:67423711-67427438	4.25983	0.0002	0.00707433	19.1574	yes	6.13247	5e-05	0.00116756	70.1548	yes	2.44978	0.01245	0.212245	5.46333	no	0.613617	1	1	1.53009	no
A2ML1	XLOC_010396	12:8834162-9039597	4.23986	5e-05	0.00217877	18.894	yes	4.21436	5e-05	0.00116756	18.563	yes	2.52777	0.0045	0.118112	5.7668	no	0.291367	1	1	1.2238	no
CACNA1G	XLOC_021200	17:48633567-48709301	4.23792	5e-05	0.00217877	18.8687	yes	5.2822	5e-05	0.00116756	38.9135	yes	0.988354	1	1	1.98392	no	1.03163	1	1	2.04433	no
PDE4C	XLOC_025823	19:18315539-18366229	4.21487	5e-05	0.00217877	18.5696	yes	4.66313	5e-05	0.00116756	25.3362	yes	0.663696	1	1	1.58414	no	1.09092	1	1	2.1301	no
AC016735.2	XLOC_028860	2:43254977-43270921	4.17462	0.0011	0.0272495	18.0587	yes	5.16585	0.00225	0.029951	35.8985	yes	1.55048	1	1	2.92915	no	3.09632	1	1	8.55234	no
AQP3	XLOC_050678	9:33441151-33447609	4.16525	5e-05	0.00217877	17.9418	yes	5.40715	5e-05	0.00116756	42.434	yes	-0.518925	0.0915	0.58603	0.697892	no	-0.814708	0.01105	0.317607	0.568524	no
MB	XLOC_033325	22:36002810-36033998	4.12869	5e-05	0.00217877	17.4928	yes	5.63499	5e-05	0.00116756	49.6937	yes	0.352048	1	1	1.27637	no	-0.188431	1	1	0.87756	no
PLA2G4E	XLOC_017457	15:42264960-42343388	4.08611	5e-05	0.00217877	16.9841	yes	4.2094	5e-05	0.00116756	18.4993	yes	2.02907	0.00025	0.0151867	4.08142	yes	-0.266778	1	1	0.831174	no
SLCO2A1	XLOC_035889	3:133651539-133771028	4.05545	5e-05	0.00217877	16.6269	yes	3.08681	0.00045	0.00778592	8.49615	yes	1.58538	1	1	3.00087	no	0.450801	1	1	1.3668	no
KRT16P2	XLOC_021892	17:16733156-16744006	4.03949	5e-05	0.00217877	16.444	yes	5.13824	5e-05	0.00116756	35.218	yes	3.10141	0.00035	0.0197921	8.58257	yes	0.934894	1	1	1.91175	no
CAMK2B	XLOC_046028	7:44256748-44374176	4.01702	5e-05	0.00217877	16.1899	yes	5.27519	5e-05	0.00116756	38.7249	yes	-0.455256	1	1	0.729381	no	-0.507562	1	1	0.70341	no
NUPR1	XLOC_019619	16:28548605-28550495	3.95316	5e-05	0.00217877	15.4889	yes	4.27355	5e-05	0.00116756	19.3405	yes	3.92243	5e-05	0.00369973	15.1624	yes	1.35975	0.016	0.389644	2.56641	no
SLC22A31	XLOC_020267	16:89262170-89267718	3.92254	5e-05	0.00217877	15.1636	yes	4.66358	5e-05	0.00116756	25.3441	yes	1.46895	1	1	2.7682	no	1.41926	1	1	2.67448	no
P2RX2	XLOC_011559	12:133195318-133198972	3.89342	5e-05	0.00217877	14.8606	yes	4.71513	5e-05	0.00116756	26.2661	yes	0.0236568	1	1	1.01653	no	-0.261089	1	1	0.834458	no
MGAT3	XLOC_032887	22:39853348-39888199	3.87475	5e-05	0.00217877	14.6695	yes	4.47305	5e-05	0.00116756	22.2087	yes	1.86049	1	1	3.63131	no	0.241013	1	1	1.18182	no
ESPNL	XLOC_028465	2:239008797-239041928	3.86794	0.0001	0.00393125	14.6004	yes	5.53677	5e-05	0.00116756	46.4231	yes	-1.02285	1	1	0.492143	no	0.309942	1	1	1.23966	no
TNFRSF1B	XLOC_000189	1:12227059-12269285	3.78466	5e-05	0.00217877	13.7815	yes	4.02403	5e-05	0.00116756	16.2687	yes	0.387708	1	1	1.30831	no	-1.48537	1	1	0.357157	no
PTH1R	XLOC_033881	3:46899135-46945287	3.78191	5e-05	0.00217877	13.7552	yes	5.20439	5e-05	0.00116756	36.8704	yes	-0.508428	1	1	0.702988	no	-0.674226	1	1	0.626668	no
S100A7	XLOC_004090	1:153430219-153433177	3.77941	5e-05	0.00217877	13.7314	yes	1.67025	0.0045	0.0526204	3.1827	no	3.33927	5e-05	0.00369973	10.1209	yes	1.19437	0.05375	0.666081	2.28845	no
MMP1	XLOC_009933	11:102617698-102714534	3.76191	5e-05	0.00217877	13.5659	yes	3.04296	5e-05	0.00116756	8.2418	yes	0.636503	0.30455	0.857578	1.55456	no	-0.67767	1	1	0.625174	no
TMPRSS6	XLOC_033353	22:37461461-37505739	3.73204	5e-05	0.00217877	13.2879	yes	4.26921	5e-05	0.00116756	19.2824	yes	-0.219738	1	1	0.858721	no	-0.592247	1	1	0.663309	no
MMP9	XLOC_030860	20:44637546-44688789	3.726	5e-05	0.00217877	13.2324	yes	4.82088	5e-05	0.00116756	28.2637	yes	0.921578	0.00065	0.0316159	1.89419	yes	-0.359036	0.17775	0.974991	0.779685	no
S100A9	XLOC_001585	1:153330329-153333503	3.6163	5e-05	0.00217877	12.2635	yes	3.56248	5e-05	0.00116756	11.8144	yes	3.05942	5e-05	0.00369973	8.33637	yes	0.945377	5e-05	0.00948904	1.92569	yes
SAA1	XLOC_007511	11:18287720-18291524	3.60331	5e-05	0.00217877	12.1536	yes	3.54225	5e-05	0.00116756	11.6499	yes	3.06334	5e-05	0.00369973	8.35906	yes	0.909226	0.0177	0.412598	1.87804	no
SHH	XLOC_046967	7:155592679-155605146	3.60155	0.0022	0.0467363	12.1388	yes	4.0663	0.00125	0.0186161	16.7524	yes	1.33449	1	1	2.52186	no	1.51089	1	1	2.84986	no
BGN	XLOC_057822	X:152710177-152775012	3.58888	0.0003	0.0100233	12.0326	yes	3.83286	0.00035	0.00629054	14.2497	yes	1.53851	0.09345	0.591581	2.90494	no	-0.183844	1	1	0.880354	no
C2,CFB	XLOC_041994	6:31865561-31919861	3.58035	5e-05	0.00217877	11.9617	yes	3.98966	5e-05	0.00116756	15.8857	yes	1.97376	5e-05	0.00369973	3.9279	yes	0.126645	0.73935	0.999777	1.09175	no
SERPINA1	XLOC_015896	14:94843083-94857030	3.51193	5e-05	0.00217877	11.4077	yes	4.08747	5e-05	0.00116756	17.0001	yes	1.71375	5e-05	0.00369973	3.28012	yes	0.454402	0.1866	0.979968	1.37021	no
PDZK1IP1	XLOC_003280	1:47649264-47656716	3.48244	5e-05	0.00217877	11.1768	yes	3.14174	5e-05	0.00116756	8.82588	yes	2.91833	5e-05	0.00369973	7.55971	yes	0.172053	0.6614	0.999777	1.12666	no
CDKN1C	XLOC_008805	11:2904442-2907111	3.4685	5e-05	0.00217877	11.0694	yes	4.53485	5e-05	0.00116756	23.1807	yes	0.579019	0.0985	0.601557	1.49383	no	-0.0936643	0.80025	0.999777	0.937139	no
SLC1A6	XLOC_025750	19:15060845-15134081	3.439	5e-05	0.00217877	10.8453	yes	2.74508	1	1	6.70427	no	3.90765	5e-05	0.00369973	15.0079	yes	1.83903	1	1	3.57769	no
SLPI	XLOC_031502	20:43880879-43883205	3.43517	5e-05	0.00217877	10.8166	yes	3.96671	5e-05	0.00116756	15.635	yes	1.75618	5e-05	0.00369973	3.37802	yes	-0.713142	0.03725	0.575961	0.60999	no
IGFL1	XLOC_024987	19:46732220-46734500	3.41087	5e-05	0.00217877	10.6359	yes	1.53735	5e-05	0.00116756	2.90261	yes	3.24583	5e-05	0.00369973	9.4862	yes	1.08301	0.0025	0.139085	2.11845	no
RP11-108M9.3,U1	XLOC_000271	1:17196253-17200587	3.36771	0.0007	0.0194002	10.3224	yes	0.421605	1	1	1.33942	no	0.208291	1	1	1.15532	no	0.0653927	1	1	1.04637	no
GBP5	XLOC_003589	1:89724632-89738566	3.3623	5e-05	0.00217877	10.2838	yes	3.13197	0.0001	0.00213617	8.76631	yes	4.20426	5e-05	0.00369973	18.4335	yes	1.98895	1	1	3.96948	no
ABCG1	XLOC_031951	21:43619798-43720903	3.36059	5e-05	0.00217877	10.2716	yes	3.71487	5e-05	0.00116756	13.1307	yes	2.45972	5e-05	0.00369973	5.5011	yes	2.00284	5e-05	0.00948904	4.00788	yes
LGI3	XLOC_048331	8:22004337-22021992	3.36029	0.00105	0.026464	10.2695	yes	5.40908	0.0001	0.00213617	42.4908	yes	-0.116053	1	1	0.922709	no	-2.70395	1	1	0.153472	no
ELF3	XLOC_002120	1:201951499-201986316	3.35501	0.00015	0.00555	10.232	yes	2.98189	0.00035	0.00629054	7.9002	yes	1.47108	0.1356	0.682483	2.77229	no	-0.508015	0.62775	0.999777	0.703189	no
SYT8	XLOC_007281	11:1848708-1858751	3.33768	5e-05	0.00217877	10.1098	yes	3.93552	5e-05	0.00116756	15.3006	yes	1.71123	0.0009	0.0398723	3.2744	yes	0.953143	0.0708	0.723884	1.93609	no
PADI2	XLOC_002865	1:17393255-17445948	3.32984	5e-05	0.00217877	10.055	yes	4.03887	5e-05	0.00116756	16.4369	yes	1.01049	0.02735	0.333449	2.0146	no	-0.203108	0.6779	0.999777	0.868677	no
PLAC1	XLOC_058781	X:133699867-133898357	3.25906	5e-05	0.00217877	9.57359	yes	3.31952	5e-05	0.00116756	9.98332	yes	2.6866	0.0005	0.0257611	6.43794	yes	1.45181	0.0295	0.521283	2.73551	no
NRXN2	XLOC_009482	11:64373645-64490660	3.23739	5e-05	0.00217877	9.43086	yes	3.65793	5e-05	0.00116756	12.6225	yes	1.4348	1	1	2.70345	no	-1.83827	1	1	0.279657	no
IGFBP3	XLOC_046053	7:45951950-45961473	3.23685	5e-05	0.00217877	9.42734	yes	3.83445	5e-05	0.00116756	14.2654	yes	0.687901	0.12525	0.663248	1.61094	no	-1.12523	1	1	0.458429	no
CD14	XLOC_041224	5:140011312-140013286	3.22205	5e-05	0.00217877	9.33112	yes	4.52441	5e-05	0.00116756	23.0135	yes	0.663064	0.1852	0.753089	1.58344	no	0.422473	0.393	0.999777	1.34022	no
ASCL2	XLOC_008798	11:2289724-2292182	3.202	0.0024	0.049958	9.20234	yes	4.07708	0.00035	0.00629054	16.8781	yes	0.293428	1	1	1.22555	no	0.960574	1	1	1.94608	no
GRM4	XLOC_043391	6:33989623-34123399	3.19498	5e-05	0.00217877	9.15767	yes	4.26918	5e-05	0.00116756	19.282	yes	-1.67955	1	1	0.31218	no	-3.0459	1	1	0.121086	no
ESPN	XLOC_000107	1:6484847-6580121	3.18714	0.00085	0.0221967	9.10804	yes	4.27795	5e-05	0.00116756	19.3995	yes	1.22791	0.13405	0.681075	2.34227	no	-0.64536	1	1	0.639333	no
SULT1E1	XLOC_038117	4:70657589-70725870	3.17738	5e-05	0.00217877	9.04663	yes	2.77769	0.0001	0.00213617	6.85753	yes	3.14507	5e-05	0.00369973	8.84627	yes	1.6672	0.00795	0.262635	3.17598	no
CALHM3	XLOC_007017	10:105232560-105238997	3.17082	0.0021	0.0450752	9.00559	yes	4.32127	0.0002	0.00389186	19.9909	yes	0.362605	1	1	1.28575	no	-1.27259	1	1	0.413916	no
PSG5	XLOC_026208	19:43670407-43690688	3.14169	5e-05	0.00217877	8.82557	yes	2.82229	5e-05	0.00116756	7.07284	yes	0.818901	0.1315	0.674271	1.76406	no	0.551419	1	1	1.46553	no
FAM73A	XLOC_001000	1:78245308-78345369	3.09601	5e-05	0.00217877	8.55051	yes	-0.397521	0.1553	0.596962	0.759162	no	-0.295616	0.3817	0.90802	0.814724	no	-0.341701	0.28	0.999777	0.78911	no
FBLN2	XLOC_033634	3:13573823-13679922	3.08208	5e-05	0.00217877	8.46834	yes	3.61558	5e-05	0.00116756	12.2574	yes	0.469684	0.1567	0.716095	1.38481	no	-0.31096	0.41905	0.999777	0.806105	no
KRT16	XLOC_022348	17:39766029-39772151	3.0697	5e-05	0.00217877	8.39599	yes	3.36649	5e-05	0.00116756	10.3137	yes	2.42594	5e-05	0.00369973	5.37379	yes	0.837945	0.00115	0.0870607	1.7875	no
CCL20	XLOC_028361	2:228678557-228682272	3.05447	5e-05	0.00217877	8.30782	yes	2.49212	5e-05	0.00116756	5.62604	yes	2.68791	5e-05	0.00369973	6.44379	yes	1.59706	5e-05	0.00948904	3.02526	yes
RPLP0P2	XLOC_007935	11:61382485-61408610	3.05151	5e-05	0.00217877	8.29079	yes	4.26993	5e-05	0.00116756	19.292	yes	-0.127323	0.86645	0.994059	0.915529	no	-1.05311	0.1331	0.907911	0.481928	no
LTB	XLOC_043309	6:31548301-31550299	3.043	5e-05	0.00217877	8.24203	yes	2.74651	5e-05	0.00116756	6.71092	yes	1.98599	5e-05	0.00369973	3.96134	yes	1.51205	5e-05	0.00948904	2.85215	yes
LIF	XLOC_033262	22:30635182-30642907	3.02326	5e-05	0.00217877	8.13003	yes	3.50533	5e-05	0.00116756	11.3556	yes	1.59274	5e-05	0.00369973	3.01622	yes	0.32555	0.21095	0.999777	1.25314	no
SGPP2	XLOC_028339	2:223289035-223427340	3.01012	5e-05	0.00217877	8.05631	yes	1.54632	1	1	2.92071	no	3.38186	5e-05	0.00369973	10.4242	yes	1.12819	1	1	2.18584	no
FOXO6	XLOC_000649	1:41827593-41849262	3.00251	0.00195	0.0421054	8.01393	yes	3.97745	0.0004	0.00703218	15.7519	yes	0.763387	1	1	1.69747	no	-0.100656	1	1	0.932609	no
APCDD1	XLOC_023086	18:10454624-10488698	2.9989	0.0002	0.00707433	7.9939	yes	1.82433	0.0075	0.0771436	3.54143	no	3.25224	0.0001	0.00706142	9.52844	yes	1.57616	1	1	2.98175	no
RP11-1082L8.3	XLOC_049116	8:125842430-125974396	2.99574	5e-05	0.00217877	7.97641	yes	3.06045	5e-05	0.00116756	8.34233	yes	0.681393	0.23325	0.801409	1.60369	no	0.469467	0.51135	0.999777	1.3846	no
PLA2G4F	XLOC_017459	15:42432901-42448839	2.98325	5e-05	0.00217877	7.90766	yes	4.4111	5e-05	0.00116756	21.2752	yes	-0.9736	1	1	0.509234	no	-0.204821	1	1	0.867646	no
BMF	XLOC_017419	15:40380090-40401093	2.93525	5e-05	0.00217877	7.64889	yes	3.53093	5e-05	0.00116756	11.5589	yes	0.024283	0.96245	0.99475	1.01697	no	-1.39133	0.01355	0.354861	0.381213	no
DLL4	XLOC_016527	15:41221537-41231237	2.92109	5e-05	0.00217877	7.57418	yes	3.90808	5e-05	0.00116756	15.0124	yes	1.05013	0.03255	0.3599	2.07072	no	-0.0995715	1	1	0.93331	no
SLC7A7	XLOC_015274	14:23242308-23299029	2.91385	5e-05	0.00217877	7.53627	yes	3.48858	5e-05	0.00116756	11.2245	yes	1.58914	0.0009	0.0398723	3.0087	yes	0.39563	1	1	1.31552	no
PLA2G4D	XLOC_017458	15:42359206-42386778	2.89024	5e-05	0.00217877	7.41394	yes	4.01352	5e-05	0.00116756	16.1506	yes	-0.371785	1	1	0.772826	no	-0.63367	1	1	0.644535	no
AC008676.1,CYFIP2	XLOC_039978	5:156687131-157002783	2.88813	5e-05	0.00217877	7.4031	yes	3.47372	5e-05	0.00116756	11.1095	yes	1.65914	1	1	3.15828	no	2.19671	1	1	4.58433	no
PSG11	XLOC_026204	19:43511807-43530664	2.8868	5e-05	0.00217877	7.39628	yes	2.09821	1	1	4.28178	no	2.20944	1	1	4.62496	no	-0.820851	1	1	0.566108	no
RP11-48O20.4	XLOC_001715	1:159931007-159948851	2.87378	0.0011	0.0272495	7.32983	yes	1.69724	0.0136	0.12003	3.2428	no	3.5339	0.00025	0.0151867	11.5827	yes	0.163333	1	1	1.11987	no
KLK6	XLOC_026407	19:51446558-51515385	2.86695	0.00035	0.0110556	7.29521	yes	4.61274	5e-05	0.00116756	24.4666	yes	-0.880451	0.2468	0.811996	0.543198	no	-1.02275	0.1827	0.976162	0.492177	no
-	XLOC_035303	3:46457910-46465246	2.86034	5e-05	0.00217877	7.26186	yes	4.21755	5e-05	0.00116756	18.6041	yes	-1.11223	1	1	0.462578	no	-0.726752	1	1	0.604263	no
SYT12	XLOC_008080	11:66774248-66818334	2.81117	5e-05	0.00217877	7.01854	yes	3.38559	5e-05	0.00116756	10.4512	yes	0.745554	0.1103	0.626279	1.67662	no	-0.197871	0.6933	0.999777	0.871836	no
KIAA1644	XLOC_033478	22:44639546-44727606	2.8111	5e-05	0.00217877	7.01819	yes	4.08519	5e-05	0.00116756	16.9732	yes	0.38287	1	1	1.30393	no	0.258082	1	1	1.19589	no
RP11-61L23.2	XLOC_046877	7:143318042-143534026	2.80881	5e-05	0.00217877	7.00706	yes	2.45263	5e-05	0.00116756	5.47413	yes	1.07362	0.05395	0.460994	2.10471	no	-0.12234	1	1	0.918696	no
CXCL10	XLOC_038160	4:76932336-77033955	2.80289	5e-05	0.00217877	6.97837	yes	3.39566	5e-05	0.00116756	10.5244	yes	3.15713	5e-05	0.00369973	8.92053	yes	1.75764	0.00285	0.14788	3.38145	no
WNT4	XLOC_002918	1:22446167-22470462	2.79026	5e-05	0.00217877	6.91754	yes	3.17813	5e-05	0.00116756	9.05133	yes	1.49331	0.00095	0.0412983	2.81534	yes	0.2948	0.5114	0.999777	1.22671	no
RP11-701H24.4,SNHG14,SNORD115-13,SNORD115-26,SNORD115-46,SNORD115-7,SNORD116-22,SNORD116-28,SNORD116-4	XLOC_016291	15:25068793-25684231	2.78716	5e-05	0.00217877	6.9027	yes	-0.169316	0.75785	0.99426	0.889264	no	0.0364626	0.94565	0.994059	1.0256	no	0.122751	0.8281	0.999777	1.08881	no
SCN2B,SCN4B	XLOC_010075	11:118004091-118047388	2.77979	5e-05	0.00217877	6.86752	yes	4.61349	5e-05	0.00116756	24.4793	yes	0.759616	1	1	1.69304	no	-0.475362	1	1	0.719286	no
S100A3,S100A4	XLOC_004095	1:153516088-153533035	2.7737	5e-05	0.00217877	6.8386	yes	3.42944	5e-05	0.00116756	10.7737	yes	0.0759066	0.82245	0.994059	1.05402	no	-0.272975	0.4487	0.999777	0.827611	no
GABRE	XLOC_058914	X:151121595-151143152	2.76975	5e-05	0.00217877	6.8199	yes	3.01849	5e-05	0.00116756	8.10319	yes	1.42506	0.0067	0.149365	2.68526	no	0.389083	0.46355	0.999777	1.30956	no
CDSN	XLOC_043286	6:31082526-31107869	2.76912	5e-05	0.00217877	6.81692	yes	4.73127	5e-05	0.00116756	26.5616	yes	-0.877195	0.113	0.63436	0.544425	no	-0.800695	0.15955	0.946611	0.574073	no
WNT3A	XLOC_002380	1:228194705-228249076	2.75496	0.00015	0.00555	6.75034	yes	3.66194	5e-05	0.00116756	12.6577	yes	-0.609413	1	1	0.655463	no	-0.813459	1	1	0.569016	no
FA2H	XLOC_020118	16:74746852-74808742	2.75449	0.00145	0.0334031	6.74814	yes	3.9693	0.0001	0.00213617	15.6631	yes	1.91414	1	1	3.76889	no	0.963302	1	1	1.94977	no
GUSBP2	XLOC_043164	6:26839262-26924333	2.68834	0.00035	0.0110556	6.44571	yes	2.03976	0.00745	0.0767325	4.11177	no	-0.181733	1	1	0.881643	no	3.38069	0.0001	0.0162988	10.4157	yes
WNT6	XLOC_028298	2:219724543-219738955	2.67797	0.0007	0.0194002	6.39955	yes	3.84106	5e-05	0.00116756	14.3309	yes	1.48075	0.0383	0.388899	2.79094	no	-0.244093	1	1	0.844346	no
IL21R	XLOC_018512	16:27413482-27464714	2.67191	0.0012	0.0292263	6.37272	yes	3.22328	0.00015	0.00305086	9.33908	yes	-0.150566	1	1	0.900897	no	0.753414	1	1	1.68578	no
UNC5B	XLOC_005615	10:72972326-73062621	2.65132	5e-05	0.00217877	6.28242	yes	3.83715	5e-05	0.00116756	14.2921	yes	0.314555	1	1	1.24363	no	-0.349079	1	1	0.785085	no
-	XLOC_047641	8:79850711-79888109	2.64872	5e-05	0.00217877	6.27111	yes	2.24288	5e-05	0.00116756	4.73341	yes	2.04429	5e-05	0.00369973	4.1247	yes	-0.0103786	1	1	0.992832	no
TNFAIP2	XLOC_015099	14:103589649-103603776	2.64653	5e-05	0.00217877	6.26159	yes	2.50746	5e-05	0.00116756	5.68618	yes	1.49742	5e-05	0.00369973	2.82337	yes	0.297148	0.22775	0.999777	1.22871	no
PGLYRP4	XLOC_004083	1:153302595-153321318	2.6436	0.00015	0.00555	6.24889	yes	2.25854	0.0006	0.0100295	4.78507	yes	1.74718	0.00835	0.170568	3.35702	no	0.192907	0.79995	0.999777	1.14306	no
MEG3	XLOC_014961	14:101245746-101327368	2.63402	5e-05	0.00217877	6.20753	yes	4.29722	5e-05	0.00116756	19.6604	yes	-0.31496	1	1	0.803873	no	-0.128886	1	1	0.914537	no
UCA1	XLOC_024452	19:15937854-15947865	2.63249	5e-05	0.00217877	6.20095	yes	3.00301	5e-05	0.00116756	8.01671	yes	0.921371	0.0882	0.580227	1.89391	no	0.00277177	0.99635	1	1.00192	no
CLDN1	XLOC_036308	3:190023489-190040264	2.63227	5e-05	0.00217877	6.20001	yes	2.88342	5e-05	0.00116756	7.37897	yes	2.21263	5e-05	0.00369973	4.63519	yes	1.04847	0.00035	0.0400736	2.06834	yes
DLX4	XLOC_021182	17:48046212-48052321	2.62942	5e-05	0.00217877	6.18777	yes	3.47076	5e-05	0.00116756	11.0867	yes	0.293045	1	1	1.22522	no	-1.25889	1	1	0.417865	no
SCNN1D	XLOC_000039	1:1209520-1227409	2.62538	0.00015	0.00555	6.17047	yes	3.89357	5e-05	0.00116756	14.8621	yes	0.920276	1	1	1.89248	no	-0.331403	1	1	0.794763	no
IL7	XLOC_048770	8:79578281-79846109	2.60869	0.0011	0.0272495	6.0995	yes	1.99483	0.0107	0.100464	3.98569	no	1.50301	0.0723	0.533846	2.83433	no	0.648912	0.36735	0.999777	1.56799	no
KRT16P5	XLOC_021971	17:20352707-20603227	2.59988	5e-05	0.00217877	6.06236	yes	2.80663	5e-05	0.00116756	6.99648	yes	2.19039	5e-05	0.00369973	4.56429	yes	1.10119	0.01985	0.436511	2.14532	no
CPZ,GPR78	XLOC_036514	4:8560451-8621488	2.59106	5e-05	0.00217877	6.02541	yes	3.58606	5e-05	0.00116756	12.0091	yes	-0.855684	0.0343	0.369023	0.552603	no	-0.478897	0.2707	0.999777	0.717526	no
CPA4	XLOC_045362	7:129932973-129964020	2.57224	5e-05	0.00217877	5.94732	yes	1.72599	5e-05	0.00116756	3.30807	yes	1.05936	0.00125	0.0509934	2.08401	no	-0.579117	0.07965	0.755242	0.669373	no
CTB-50L17.14,LRG1,PLIN5	XLOC_025521	19:4522542-4540104	2.57198	5e-05	0.00217877	5.94625	yes	3.30572	5e-05	0.00116756	9.88828	yes	0.442568	0.3336	0.874252	1.35902	no	-0.429009	0.47595	0.999777	0.742772	no
IGFBP4	XLOC_020963	17:38599701-38613983	2.5704	0.0014	0.0327202	5.93974	yes	4.30066	5e-05	0.00116756	19.7073	yes	2.72122	0.0017	0.0630632	6.5943	no	1.38285	1	1	2.60783	no
PRODH	XLOC_033077	22:18893540-18924066	2.56501	5e-05	0.00217877	5.91759	yes	3.59931	5e-05	0.00116756	12.1199	yes	1.5701	0.0138	0.226382	2.96925	no	1.23842	0.06165	0.695486	2.3594	no
PTGS1	XLOC_050173	9:125132823-125158114	2.56331	5e-05	0.00217877	5.91062	yes	3.44279	5e-05	0.00116756	10.8738	yes	-0.0468818	0.90245	0.994059	0.968026	no	-0.275778	0.54035	0.999777	0.826005	no
RGS16	XLOC_004470	1:182567757-182573543	2.56234	0.0008	0.021236	5.90665	yes	5.0154	5e-05	0.00116756	32.3434	yes	1.37342	1	1	2.59084	no	-0.106202	1	1	0.929031	no
SERPINB9	XLOC_042978	6:2886343-2903530	2.54384	0.0001	0.00393125	5.83139	yes	3.76963	5e-05	0.00116756	13.6387	yes	0.106634	0.8707	0.994059	1.07671	no	-0.585448	0.4148	0.999777	0.666442	no
LRRC4B	XLOC_026393	19:51020148-51071676	2.5436	0.00035	0.0110556	5.83042	yes	3.34816	5e-05	0.00116756	10.1835	yes	-0.598607	1	1	0.660391	no	-0.666151	1	1	0.630186	no
EXOC3L4	XLOC_015098	14:103566480-103576896	2.52001	0.001	0.0253363	5.73586	yes	2.94116	0.0011	0.0167408	7.68029	yes	0.865602	1	1	1.8221	no	-0.307102	1	1	0.808264	no
KCNH2	XLOC_046926	7:150642048-150675403	2.51569	5e-05	0.00217877	5.71871	yes	3.46169	5e-05	0.00116756	11.0172	yes	-2.42201	1	1	0.186596	no	-1.31699	1	1	0.401371	no
LRRC32	XLOC_009746	11:76368099-76381791	2.50577	0.0023	0.0484339	5.67952	yes	3.9475	5e-05	0.00116756	15.4282	yes	0.290288	1	1	1.22288	no	-0.382147	1	1	0.767295	no
TMPRSS2	XLOC_032305	21:42836477-42903043	2.50495	0.00015	0.00555	5.6763	yes	2.72881	5e-05	0.00116756	6.62909	yes	0.0597073	1	1	1.04225	no	-0.282137	1	1	0.822372	no
ATP8B3	XLOC_025447	19:1782073-1812275	2.48908	0.0002	0.00707433	5.6142	yes	3.50437	5e-05	0.00116756	11.348	yes	-0.130512	1	1	0.913507	no	-0.228294	1	1	0.853644	no
ACSL5	XLOC_005994	10:114133775-114188138	2.46618	5e-05	0.00217877	5.52579	yes	2.22032	0.0001	0.00213617	4.65997	yes	1.74147	1	1	3.34376	no	0.946711	1	1	1.92747	no
CYTH4	XLOC_032843	22:37678067-37711382	2.46569	5e-05	0.00217877	5.52391	yes	2.78498	5e-05	0.00116756	6.89227	yes	-0.810153	1	1	0.570321	no	-1.03485	1	1	0.488067	no
NGFR	XLOC_021170	17:47572654-47661189	2.46107	5e-05	0.00217877	5.50625	yes	3.02749	5e-05	0.00116756	8.1539	yes	0.889347	0.00655	0.148564	1.85234	no	0.853242	0.0086	0.270783	1.80656	no
COL5A3	XLOC_025633	19:10070236-10121221	2.45766	5e-05	0.00217877	5.49325	yes	3.68916	5e-05	0.00116756	12.8988	yes	0.161596	0.6152	0.978946	1.11852	no	-0.170791	0.61285	0.999777	0.888355	no
DGAT2	XLOC_008240	11:75479777-75855266	2.45583	0.0008	0.021236	5.48629	yes	2.77421	0.00035	0.00629054	6.84101	yes	0.732983	0.3128	0.864189	1.66207	no	0.512346	0.5059	0.999777	1.42637	no
AC087491.2	XLOC_020937	17:37759788-37779400	2.44487	0.00075	0.0205497	5.44477	yes	2.163	0.0008	0.0128126	4.47845	yes	2.77136	0.00025	0.0151867	6.82751	yes	1.43391	0.0778	0.750546	2.70178	no
HSPB8	XLOC_011412	12:119616446-119658936	2.44427	5e-05	0.00217877	5.4425	yes	3.89874	5e-05	0.00116756	14.9155	yes	-0.720192	0.0628	0.50148	0.607017	no	-1.74984	0.00065	0.0592441	0.297335	no
PVRL4	XLOC_004273	1:161040780-161059389	2.43824	5e-05	0.00217877	5.4198	yes	2.93593	5e-05	0.00116756	7.65249	yes	0.615069	0.09965	0.602186	1.53163	no	-0.982344	0.04415	0.625413	0.506157	no
WFDC2	XLOC_030845	20:44095909-44110172	2.4314	5e-05	0.00217877	5.39417	yes	2.25758	5e-05	0.00116756	4.78189	yes	1.17366	0.00245	0.0809548	2.25583	no	-0.330109	0.43175	0.999777	0.795476	no
GRHL1	XLOC_026678	2:10085340-10142411	2.41768	5e-05	0.00217877	5.34311	yes	3.11866	5e-05	0.00116756	8.68581	yes	0.385991	0.3843	0.909147	1.30676	no	-0.263715	0.6116	0.999777	0.83294	no
CREB3L1	XLOC_007711	11:46299211-46342972	2.40294	0.0004	0.0123123	5.2888	yes	3.45471	5e-05	0.00116756	10.9641	yes	0.27872	1	1	1.21312	no	0.511297	1	1	1.42533	no
CAMP	XLOC_033902	3:48264836-48266981	2.40132	0.0001	0.00393125	5.28286	yes	4.18698	5e-05	0.00116756	18.2141	yes	-0.319082	0.57815	0.976015	0.80158	no	-0.701846	0.25895	0.999777	0.614785	no
CD163,CD163L1	XLOC_011668	12:7499280-7656489	2.39579	5e-05	0.00217877	5.26265	yes	2.98641	5e-05	0.00116756	7.92499	yes	0.431123	0.39655	0.915404	1.34828	no	-0.50355	0.3034	0.999777	0.705369	no
ITGA7	XLOC_012202	12:56075329-56118489	2.38765	0.00025	0.00863186	5.23304	yes	3.85243	5e-05	0.00116756	14.4443	yes	-0.610182	1	1	0.655114	no	-0.283002	1	1	0.821879	no
KRT80	XLOC_012117	12:52562779-52585784	2.38206	5e-05	0.00217877	5.21281	yes	2.97142	5e-05	0.00116756	7.84308	yes	0.757145	0.001	0.0430681	1.69014	yes	0.127438	0.5983	0.999777	1.09235	no
SLC2A3	XLOC_011679	12:7917811-8250367	2.38067	0.00065	0.0182593	5.20779	yes	1.80519	0.0068	0.0720263	3.49475	no	2.39344	0.00315	0.0940336	5.25409	no	0.622451	0.4079	0.999777	1.53949	no
P2RX7	XLOC_011442	12:121570621-121625835	2.37203	5e-05	0.00217877	5.17669	yes	2.55073	5e-05	0.00116756	5.85931	yes	1.88417	0.0004	0.0218212	3.6914	yes	-0.0796834	1	1	0.946265	no
SOD2	XLOC_044237	6:160100095-160210781	2.35782	5e-05	0.00217877	5.12595	yes	2.39261	5e-05	0.00116756	5.25106	yes	2.03818	5e-05	0.00369973	4.10727	yes	0.615546	0.1927	0.987302	1.53214	no
PSCA	XLOC_048039	8:143733501-143764142	2.3569	0.00045	0.0134786	5.12268	yes	2.77926	0.0001	0.00213617	6.865	yes	-0.324082	0.672	0.992272	0.798807	no	-1.22314	0.1466	0.930369	0.428349	no
LINC00313	XLOC_032349	21:44881973-44899655	2.3217	0.00025	0.00863186	4.99921	yes	2.96931	5e-05	0.00116756	7.83162	yes	0.605549	0.3246	0.870041	1.52156	no	-0.0823164	0.90415	0.999777	0.94454	no
ALPL	XLOC_000332	1:21835857-21904905	2.31668	0.00015	0.00555	4.98184	yes	4.26533	5e-05	0.00116756	19.2306	yes	0.710691	1	1	1.63659	no	-0.126436	1	1	0.916092	no
EXOC3L1	XLOC_019996	16:67218268-67224107	2.30245	0.0001	0.00393125	4.93295	yes	2.53889	5e-05	0.00116756	5.81142	yes	1.99938	0.00105	0.0445322	3.99828	yes	0.820058	0.15415	0.938615	1.76548	no
C5orf4	XLOC_041358	5:154198050-154256353	2.30007	0.00045	0.0134786	4.92482	yes	3.12803	5e-05	0.00116756	8.7424	yes	-0.0260351	0.9671	0.996004	0.982116	no	-0.795203	0.17645	0.973584	0.576262	no
PSG9	XLOC_026210	19:43715942-43868237	2.29414	0.00015	0.00555	4.90462	yes	2.36704	5e-05	0.00116756	5.15882	yes	0.410612	1	1	1.32925	no	-0.361937	1	1	0.778119	no
AQPEP,ARL14EPL,CTD-2287O16.3	XLOC_039618	5:115298150-115395118	2.28375	0.00085	0.0221967	4.86942	yes	1.76081	0.00705	0.0736542	3.38888	no	1.19076	1	1	2.28273	no	-0.86637	1	1	0.548525	no
NDRG1	XLOC_049176	8:134249413-134314265	2.2812	5e-05	0.00217877	4.86082	yes	1.93207	5e-05	0.00116756	3.81602	yes	1.56353	5e-05	0.00369973	2.95576	yes	0.131619	0.61655	0.999777	1.09552	no
FAM65C	XLOC_031582	20:49202644-49308065	2.27746	0.00115	0.0282943	4.84824	yes	3.39481	5e-05	0.00116756	10.5182	yes	0.13153	1	1	1.09545	no	-0.18833	1	1	0.877621	no
RP11-284F21.7	XLOC_004182	1:156611181-156631236	2.27575	5e-05	0.00217877	4.84249	yes	3.77946	5e-05	0.00116756	13.7319	yes	-0.708394	1	1	0.612001	no	-0.577996	1	1	0.669894	no
ELFN1	XLOC_044341	7:1709897-1787590	2.27223	0.00045	0.0134786	4.83069	yes	3.70548	5e-05	0.00116756	13.0455	yes	-0.405468	1	1	0.754991	no	-0.471187	1	1	0.721371	no
C10orf10	XLOC_006508	10:45306471-45490172	2.2671	5e-05	0.00217877	4.81355	yes	2.68745	5e-05	0.00116756	6.44174	yes	1.28234	0.0004	0.0218212	2.43233	yes	-0.222071	0.5561	0.999777	0.857334	no
RP11-328J14.2	XLOC_020102	16:72277196-72325317	2.26402	0.0004	0.0123123	4.80328	yes	1.95373	0.0016	0.0227224	3.87375	yes	2.41113	0.00025	0.0151867	5.31891	yes	2.16478	0.001	0.0810175	4.48398	no
-	XLOC_000077	1:2477759-2479016	2.25855	0.00175	0.0388301	4.7851	yes	2.1381	0.00095	0.014677	4.40182	yes	-0.25655	1	1	0.837087	no	-0.06987	1	1	0.952724	no
C15orf48	XLOC_016601	15:45722726-45878488	2.25255	0.0011	0.0272495	4.76524	yes	2.20152	0.00035	0.00629054	4.59964	yes	1.57303	0.01335	0.222143	2.97529	no	-1.25577	0.1197	0.874087	0.41877	no
KCNN3	XLOC_004131	1:154675204-154842796	2.24675	5e-05	0.00217877	4.74612	yes	3.11735	5e-05	0.00116756	8.67792	yes	-0.49055	1	1	0.711754	no	-1.43814	1	1	0.369043	no
FAM78A	XLOC_051477	9:134133462-134151934	2.24504	0.00035	0.0110556	4.7405	yes	3.14071	5e-05	0.00116756	8.81958	yes	-0.000643673	1	1	0.999554	no	-0.295887	1	1	0.814571	no
SPRR2D	XLOC_004075	1:153012200-153014407	2.23456	5e-05	0.00217877	4.70619	yes	2.64267	5e-05	0.00116756	6.24486	yes	2.17053	0.0002	0.0127624	4.50189	yes	-0.535015	0.3824	0.999777	0.690152	no
PHEX	XLOC_056827	X:22050558-22269427	2.23362	0.0001	0.00393125	4.70313	yes	1.69411	0.00295	0.0372279	3.23577	yes	0.767239	1	1	1.70201	no	0.335096	1	1	1.26146	no
PLXDC2	XLOC_005227	10:20105167-20570340	2.22772	5e-05	0.00217877	4.68393	yes	1.08681	0.013	0.115736	2.12404	no	1.65055	0.0008	0.0367287	3.13953	yes	0.874246	0.06395	0.700901	1.83305	no
LSP1	XLOC_007283	11:1874199-1913497	2.22055	5e-05	0.00217877	4.66071	yes	2.9199	5e-05	0.00116756	7.56794	yes	0.43989	1	1	1.3565	no	0.192214	1	1	1.14252	no
AC022596.6	XLOC_021891	17:16721288-16725977	2.20645	5e-05	0.00217877	4.61538	yes	2.43783	5e-05	0.00116756	5.41826	yes	1.72773	5e-05	0.00369973	3.31206	yes	0.633413	0.04775	0.639158	1.55123	no
IL6	XLOC_044486	7:22765013-22771621	2.20152	5e-05	0.00217877	4.59964	yes	1.73772	5e-05	0.00116756	3.33508	yes	2.13321	5e-05	0.00369973	4.38692	yes	1.06372	0.00535	0.210565	2.09031	no
NEURL3	XLOC_029343	2:97163382-97173846	2.20089	0.0007	0.0194002	4.59763	yes	2.50007	0.00015	0.00305086	5.65713	yes	1.54231	0.0149	0.235806	2.9126	no	0.604055	1	1	1.51998	no
CSF1	XLOC_001238	1:110452863-110473614	2.19473	5e-05	0.00217877	4.57804	yes	2.99017	5e-05	0.00116756	7.94568	yes	1.09043	5e-05	0.00369973	2.12937	yes	0.405269	0.15555	0.941044	1.32434	no
CERS3	XLOC_018113	15:100913143-101085200	2.18309	0.00175	0.0388301	4.54125	yes	1.36571	1	1	2.57703	no	2.44102	0.0004	0.0218212	5.43026	yes	1.36696	1	1	2.57926	no
FGFBP1	XLOC_037822	4:15937191-15940363	2.1794	5e-05	0.00217877	4.52965	yes	2.05491	5e-05	0.00116756	4.15518	yes	1.60322	5e-05	0.00369973	3.03821	yes	1.28796	5e-05	0.00948904	2.44183	yes
GDPD3	XLOC_019663	16:30116130-30125177	2.17709	5e-05	0.00217877	4.5224	yes	2.96085	5e-05	0.00116756	7.78583	yes	0.156175	0.76345	0.994059	1.11433	no	-0.449473	0.4452	0.999777	0.73231	no
TLR2	XLOC_037435	4:154605271-154627331	2.16976	5e-05	0.00217877	4.49949	yes	2.69224	5e-05	0.00116756	6.46316	yes	0.859039	0.0088	0.175634	1.81383	no	-0.105992	0.7521	0.999777	0.929166	no
FGD2	XLOC_042097	6:36973322-36997122	2.16951	0.0002	0.00707433	4.49871	yes	2.54409	5e-05	0.00116756	5.8324	yes	0.808402	0.12025	0.652163	1.75127	no	0.518512	0.3588	0.999777	1.43248	no
DDIT4	XLOC_005626	10:74033677-74035794	2.15624	5e-05	0.00217877	4.45752	yes	1.69144	5e-05	0.00116756	3.22979	yes	2.42365	5e-05	0.00369973	5.36527	yes	1.99534	5e-05	0.00948904	3.9871	yes
SUSD2	XLOC_032683	22:24577226-24585078	2.15114	0.00075	0.0205497	4.44179	yes	2.83655	5e-05	0.00116756	7.1431	yes	-1.01087	1	1	0.496247	no	-0.296852	1	1	0.814027	no
NNMT	XLOC_008511	11:113930314-114227293	2.13848	5e-05	0.00217877	4.40298	yes	1.77747	5e-05	0.00116756	3.42824	yes	2.21935	5e-05	0.00369973	4.65684	yes	1.00871	0.0026	0.140157	2.01211	no
MEST	XLOC_045367	7:130126045-130148500	2.13333	5e-05	0.00217877	4.38729	yes	2.96245	5e-05	0.00116756	7.79446	yes	0.362294	0.1541	0.714305	1.28547	no	0.0377548	0.89175	0.999777	1.02652	no
RASGRP2	XLOC_009483	11:64494382-64512928	2.12806	5e-05	0.00217877	4.37129	yes	2.37657	5e-05	0.00116756	5.19301	yes	0.988594	0.0173	0.254864	1.98425	no	0.698541	0.1161	0.865135	1.62286	no
LY6G6C	XLOC_043319	6:31686370-31694491	2.10046	0.0008	0.021236	4.28846	yes	2.77044	5e-05	0.00116756	6.82316	yes	0.453342	0.4186	0.928768	1.36921	no	-0.706147	0.26445	0.999777	0.612955	no
NIPAL4	XLOC_039980	5:156687131-157002783	2.09567	0.0009	0.0233339	4.27425	yes	1.5514	0.01015	0.0968461	2.93101	no	2.11552	0.00075	0.0347775	4.33346	yes	1.25656	0.0355	0.56272	2.38925	no
RP5-1120P11.1	XLOC_043512	6:43963338-44045689	2.08589	0.00195	0.0421054	4.24537	yes	2.78417	5e-05	0.00116756	6.88841	yes	-0.130968	1	1	0.913219	no	-0.945246	1	1	0.519341	no
GBP4	XLOC_003588	1:89646830-89664618	2.08279	0.0008	0.021236	4.23626	yes	1.7985	0.00095	0.014677	3.47858	yes	2.79587	5e-05	0.00369973	6.9445	yes	0.927296	1	1	1.90171	no
SLC38A3	XLOC_033935	3:50242678-50258411	2.07482	0.00085	0.0221967	4.21292	yes	4.40103	5e-05	0.00116756	21.1272	yes	-1.41861	1	1	0.374073	no	-1.4322	1	1	0.370565	no
TNFSF10	XLOC_036168	3:172223297-172241297	2.07003	5e-05	0.00217877	4.19895	yes	1.76304	5e-05	0.00116756	3.39413	yes	2.01783	5e-05	0.00369973	4.04974	yes	0.663754	0.0322	0.538767	1.5842	no
CTSH	XLOC_017890	15:79213399-79241916	2.0663	5e-05	0.00217877	4.18811	yes	3.19766	5e-05	0.00116756	9.17469	yes	0.138359	0.72245	0.994059	1.10065	no	-0.748991	0.0787	0.752935	0.59502	no
HPCAL4	XLOC_003168	1:40144319-40157361	2.06341	0.0001	0.00393125	4.17973	yes	3.33142	5e-05	0.00116756	10.066	yes	-1.69513	1	1	0.308827	no	-3.03444	1	1	0.122051	no
TRIM10	XLOC_043260	6:30119721-30128711	2.05305	0.0022	0.0467363	4.14982	yes	2.75002	0.00015	0.00305086	6.72726	yes	0.656952	1	1	1.57675	no	-0.525255	1	1	0.694836	no
KIF1A	XLOC_030410	2:241653180-241759725	2.0507	0.00065	0.0182593	4.14307	yes	3.48042	5e-05	0.00116756	11.1612	yes	-0.00465506	1	1	0.996779	no	-0.288329	1	1	0.81885	no
RSAD2	XLOC_026656	2:6980700-7038370	2.04973	5e-05	0.00217877	4.14028	yes	2.30767	5e-05	0.00116756	4.95083	yes	2.43453	5e-05	0.00369973	5.40588	yes	0.477566	0.3258	0.999777	1.39239	no
RAMP1	XLOC_028462	2:238767535-238820756	2.03722	5e-05	0.00217877	4.10454	yes	2.4827	5e-05	0.00116756	5.58943	yes	0.0336968	0.92765	0.994059	1.02363	no	-0.0177889	0.96735	0.999777	0.987745	no
CFH	XLOC_002063	1:196621007-196716641	2.0334	0.0001	0.00393125	4.09368	yes	2.12976	5e-05	0.00116756	4.37645	yes	1.19553	0.01775	0.258015	2.29029	no	-0.308342	0.53945	0.999777	0.807569	no
AKR1B15	XLOC_045389	7:134233823-134264622	2.02778	5e-05	0.00217877	4.07777	yes	0.729739	0.0366	0.248688	1.65834	no	0.282903	0.4399	0.937272	1.21664	no	-1.44749	0.00405	0.180896	0.366659	no
KRT15	XLOC_022343	17:39669994-39678781	2.0251	5e-05	0.00217877	4.0702	yes	2.40995	5e-05	0.00116756	5.31456	yes	1.30133	0.00175	0.0645736	2.46456	no	-0.407381	0.25825	0.999777	0.753991	no
RP1-261G23.5	XLOC_042181	6:43690522-43737745	2.01904	0.00175	0.0388301	4.05314	yes	2.21389	0.00035	0.00629054	4.63924	yes	1.21278	1	1	2.31784	no	0.578594	1	1	1.49339	no
TNFRSF18	XLOC_002635	1:1138887-1142071	2.01764	5e-05	0.00217877	4.04921	yes	2.38044	5e-05	0.00116756	5.20696	yes	1.2785	0.0104	0.193157	2.42587	no	-0.583676	0.2727	0.999777	0.667261	no
KB-1732A1.1	XLOC_047822	8:103817744-103822979	2.01592	0.0008	0.021236	4.04438	yes	2.33968	0.00015	0.00305086	5.0619	yes	0.233567	0.65235	0.986735	1.17574	no	-0.462006	0.42105	0.999777	0.725976	no
ANKRD24	XLOC_024179	19:4182710-4224811	2.01273	0.0006	0.0171885	4.03545	yes	2.99011	5e-05	0.00116756	7.94535	yes	0.105896	1	1	1.07616	no	-0.351904	1	1	0.783549	no
PTGIR	XLOC_026289	19:47123724-47128375	2.00517	0.00075	0.0205497	4.01436	yes	2.85238	5e-05	0.00116756	7.22191	yes	0.451286	1	1	1.36726	no	-1.08354	1	1	0.47187	no
C3orf18	XLOC_035392	3:50595461-50623226	1.98344	5e-05	0.00217877	3.95435	yes	2.48011	5e-05	0.00116756	5.5794	yes	1.02069	0.0373	0.382655	2.02889	no	0.648983	0.2576	0.999777	1.56806	no
SLIT3	XLOC_041439	5:168081517-168728133	1.97905	0.00035	0.0110556	3.94233	yes	2.04762	5e-05	0.00116756	4.13423	yes	0.784822	1	1	1.72288	no	-0.0241683	1	1	0.983387	no
FAM115C	XLOC_045521	7:143318042-143534026	1.96536	0.00015	0.00555	3.9051	yes	1.87404	0.0002	0.00389186	3.66558	yes	1.05734	1	1	2.08109	no	-0.433884	1	1	0.740266	no
APLP1	XLOC_024760	19:36316865-36370695	1.9638	5e-05	0.00217877	3.90088	yes	2.32244	5e-05	0.00116756	5.00177	yes	0.299844	0.41075	0.923765	1.23101	no	0.0473136	0.89565	0.999777	1.03334	no
TNIP3	XLOC_038446	4:122052562-122148621	1.95695	0.0008	0.021236	3.8824	yes	1.97191	0.0004	0.00703218	3.92287	yes	0.0701325	1	1	1.04981	no	0.0848825	1	1	1.0606	no
RHPN1	XLOC_048057	8:144451003-144466390	1.95358	5e-05	0.00217877	3.87334	yes	2.53215	5e-05	0.00116756	5.78433	yes	0.0593121	1	1	1.04197	no	-0.00950607	1	1	0.993433	no
NOVA2	XLOC_026268	19:46437009-46476804	1.9489	0.00215	0.0458086	3.8608	yes	2.22791	0.00025	0.00470905	4.68455	yes	0.556562	1	1	1.47076	no	0.303034	1	1	1.23374	no
LGALS9B	XLOC_021966	17:20352707-20603227	1.92315	0.0009	0.0233339	3.7925	yes	1.99013	0.0009	0.0140464	3.97273	yes	2.00126	0.00015	0.00993643	4.00349	yes	0.952077	0.09315	0.806059	1.93466	no
RTP4	XLOC_034876	3:187086119-187089864	1.88552	0.0002	0.00707433	3.69486	yes	2.04967	0.0001	0.00213617	4.14011	yes	1.49152	0.0025	0.0810664	2.81185	no	0.163824	0.74025	0.999777	1.12025	no
CXCL3	XLOC_038138	4:74902305-74904524	1.88453	0.0014	0.0327202	3.69233	yes	1.28756	0.01605	0.135627	2.44115	no	2.56474	0.00015	0.00993643	5.91648	yes	1.73861	0.00655	0.238172	3.33713	no
KRT31,KRT34	XLOC_022334	17:39533901-39553844	1.88426	5e-05	0.00217877	3.69164	yes	2.56023	5e-05	0.00116756	5.89802	yes	1.12926	0.00195	0.069555	2.18747	no	0.633002	0.0769	0.745016	1.55079	no
KCNAB2	XLOC_000103	1:5922870-6161253	1.88151	0.00015	0.00555	3.68461	yes	2.41208	5e-05	0.00116756	5.32241	yes	-0.0638524	0.89235	0.994059	0.956706	no	-0.0991203	0.82905	0.999777	0.933602	no
TRIM55	XLOC_047551	8:67039130-67087720	1.88094	5e-05	0.00217877	3.68315	yes	1.0059	0.00065	0.0107478	2.0082	yes	-1.83311	0.00025	0.0151867	0.280659	yes	-1.77867	0.0002	0.027708	0.291452	yes
PPP1R1B	XLOC_020938	17:37782992-37792879	1.87982	5e-05	0.00217877	3.68029	yes	2.26773	5e-05	0.00116756	4.81565	yes	0.892802	0.0137	0.226343	1.85678	no	0.256557	0.50865	0.999777	1.19462	no
C1R,C1RL	XLOC_011663	12:7187512-7275097	1.87869	5e-05	0.00217877	3.67741	yes	1.71197	5e-05	0.00116756	3.27608	yes	1.85663	5e-05	0.00369973	3.62161	yes	0.357477	0.1791	0.974991	1.28118	no
KANK4	XLOC_003412	1:62701680-62785093	1.87066	5e-05	0.00217877	3.657	yes	1.94119	5e-05	0.00116756	3.84022	yes	0.542025	0.0992	0.601557	1.45601	no	-0.0511272	0.8882	0.999777	0.965182	no
MEOX1	XLOC_022401	17:41717755-41739322	1.86954	0.0011	0.0272495	3.65416	yes	3.02712	5e-05	0.00116756	8.15181	yes	0.544665	1	1	1.45868	no	0.454881	1	1	1.37067	no
GPR173	XLOC_057127	X:53078272-53109797	1.86137	0.00175	0.0388301	3.63353	yes	1.15645	0.02625	0.196138	2.22908	no	0.939202	1	1	1.91747	no	0.814522	1	1	1.75872	no
PTGS2	XLOC_004509	1:186640922-186649559	1.83769	5e-05	0.00217877	3.57437	yes	2.04649	5e-05	0.00116756	4.131	yes	1.59958	5e-05	0.00369973	3.03055	yes	1.67172	5e-05	0.00948904	3.18594	yes
TNFRSF9	XLOC_002722	1:7976335-8000926	1.82832	5e-05	0.00217877	3.55123	yes	1.30008	0.0006	0.0100295	2.46243	yes	0.0342022	0.9406	0.994059	1.02399	no	-0.970335	0.0624	0.695486	0.510388	no
ZNF323	XLOC_043197	6:28292469-28337051	1.82825	0.0002	0.00707433	3.55106	yes	2.69653	5e-05	0.00116756	6.48241	yes	0.810508	0.09895	0.601557	1.75383	no	0.347199	0.4688	0.999777	1.27209	no
CCDC74A	XLOC_027705	2:132285247-132291239	1.82435	0.00135	0.0317568	3.54147	yes	1.94426	0.00035	0.00629054	3.8484	yes	0.480281	1	1	1.39502	no	0.887743	0.09025	0.794361	1.85028	no
PIK3IP1	XLOC_033284	22:31677578-31742218	1.82383	5e-05	0.00217877	3.5402	yes	1.4788	5e-05	0.00116756	2.78717	yes	1.06559	0.0111	0.198729	2.09303	no	0.0411405	0.92595	0.999777	1.02893	no
GATA2	XLOC_035823	3:128198269-128222002	1.82221	5e-05	0.00217877	3.53622	yes	3.41865	5e-05	0.00116756	10.6934	yes	0.506895	0.29535	0.850789	1.42099	no	-0.0690223	0.8919	0.999777	0.953284	no
MMP28	XLOC_022200	17:34083267-34122711	1.82159	5e-05	0.00217877	3.53471	yes	1.29937	0.0002	0.00389186	2.46121	yes	1.91871	5e-05	0.00369973	3.78085	yes	0.965452	0.01535	0.383592	1.95268	no
PDE2A	XLOC_009672	11:72287184-72385635	1.80898	5e-05	0.00217877	3.50394	yes	2.38587	5e-05	0.00116756	5.22659	yes	0.589499	0.16225	0.719244	1.50472	no	-0.51775	0.1886	0.981996	0.69846	no
FAM178B	XLOC_029350	2:97541619-97684341	1.80833	0.0021	0.0450752	3.50237	yes	3.09847	5e-05	0.00116756	8.5651	yes	0.149685	1	1	1.10933	no	0.351839	1	1	1.27619	no
NUDT11	XLOC_058235	X:51232862-51239448	1.80687	0.00125	0.0299896	3.49882	yes	1.55998	0.00205	0.0278957	2.9485	yes	1.5453	0.0035	0.100804	2.91865	no	1.16544	0.0279	0.504604	2.24302	no
SUSD3	XLOC_049951	9:95820981-95847420	1.7957	5e-05	0.00217877	3.47184	yes	2.26636	5e-05	0.00116756	4.81108	yes	1.83864	5e-05	0.00369973	3.57673	yes	0.692	0.1022	0.834176	1.61552	no
TNFRSF8	XLOC_000188	1:12123351-12204264	1.77695	0.0009	0.0233339	3.42701	yes	2.78885	5e-05	0.00116756	6.91079	yes	1.38143	1	1	2.60526	no	-0.17584	1	1	0.885252	no
VEGFA	XLOC_042185	6:43737920-43754224	1.77156	5e-05	0.00217877	3.41423	yes	1.62136	5e-05	0.00116756	3.07665	yes	1.58426	5e-05	0.00369973	2.99854	yes	1.09427	0.0004	0.0432938	2.13505	yes
POU2F2	XLOC_026182	19:42591766-42700737	1.76916	0.00145	0.0334031	3.40855	yes	2.0613	0.00015	0.00305086	4.17362	yes	1.08354	0.0292	0.344238	2.11923	no	0.222996	0.66105	0.999777	1.16715	no
RASD2	XLOC_032817	22:35936558-35950048	1.7672	5e-05	0.00217877	3.40393	yes	2.9684	5e-05	0.00116756	7.82668	yes	0.435642	0.24425	0.809439	1.35251	no	0.110269	0.7849	0.999777	1.07943	no
BDKRB1,BDKRB2,RP11-404P21.8	XLOC_014915	14:96671015-96735304	1.75757	5e-05	0.00217877	3.38128	yes	2.38478	5e-05	0.00116756	5.22264	yes	0.474138	0.16745	0.729023	1.38909	no	0.322135	0.40375	0.999777	1.25018	no
PODXL	XLOC_046741	7:131185018-131242976	1.74969	5e-05	0.00217877	3.36286	yes	2.79573	5e-05	0.00116756	6.94382	yes	-0.54737	0.06705	0.517036	0.684266	no	-0.703435	0.0324	0.540156	0.614108	no
TXNIP	XLOC_001400	1:145438468-145442635	1.74899	5e-05	0.00217877	3.36123	yes	1.5677	5e-05	0.00116756	2.96432	yes	2.44548	5e-05	0.00369973	5.44707	yes	2.44218	5e-05	0.00948904	5.43462	yes
CD74	XLOC_041307	5:149781199-149792492	1.74807	5e-05	0.00217877	3.35909	yes	2.66847	5e-05	0.00116756	6.35755	yes	0.681365	0.06085	0.492715	1.60366	no	-0.137647	0.7248	0.999777	0.909001	no
CXCL11	XLOC_038161	4:76932336-77033955	1.74438	5e-05	0.00217877	3.35051	yes	2.15154	5e-05	0.00116756	4.44302	yes	1.67275	5e-05	0.00369973	3.18822	yes	0.925615	0.01735	0.407884	1.89949	no
LGALS9C	XLOC_020590	17:18380050-18398259	1.72123	5e-05	0.00217877	3.29717	yes	1.96314	0.0001	0.00213617	3.8991	yes	1.86107	0.00045	0.0238021	3.63277	yes	1.15225	0.02665	0.493342	2.2226	no
TRIM15	XLOC_041925	6:30130992-30140473	1.71839	0.0008	0.021236	3.29069	yes	2.3711	5e-05	0.00116756	5.17335	yes	-0.0105979	0.9828	0.997244	0.992681	no	-1.23196	0.02875	0.513939	0.425739	no
KRT16P4,KRT17P2,RP1-37N7.4	XLOC_020586	17:18330174-18379234	1.70516	0.0023	0.0484339	3.26065	yes	1.6795	0.00275	0.0352567	3.20317	yes	1.92394	0.00085	0.0383907	3.79458	yes	0.606655	0.29975	0.999777	1.52272	no
USH1G	XLOC_022812	17:72912175-72919361	1.70157	0.00065	0.0182593	3.25255	yes	2.33941	5e-05	0.00116756	5.06096	yes	0.635061	1	1	1.553	no	-0.476484	1	1	0.718727	no
MARCKSL1	XLOC_003077	1:32799431-32801980	1.69991	5e-05	0.00217877	3.24881	yes	2.37004	5e-05	0.00116756	5.16955	yes	-0.0529962	0.8335	0.994059	0.963932	no	-0.473984	0.0755	0.743337	0.719974	no
IFI6	XLOC_003010	1:27992571-27998729	1.69755	5e-05	0.00217877	3.2435	yes	1.68153	5e-05	0.00116756	3.20768	yes	1.60724	5e-05	0.00369973	3.04668	yes	0.492535	0.0239	0.467011	1.40691	no
COL5A2	XLOC_029981	2:189896621-190044605	1.69132	5e-05	0.00217877	3.22952	yes	1.30217	5e-05	0.00116756	2.466	yes	1.49704	5e-05	0.00369973	2.82263	yes	0.858025	0.00085	0.0718043	1.81256	no
KIF26A	XLOC_015122	14:104604886-104647231	1.69046	5e-05	0.00217877	3.2276	yes	1.99379	5e-05	0.00116756	3.98282	yes	0.685936	0.01655	0.250792	1.60875	no	0.333308	0.247	0.999777	1.2599	no
RAPGEF3	XLOC_012022	12:48099867-48231681	1.67694	0.0013	0.0309837	3.19749	yes	2.04532	0.0002	0.00389186	4.12765	yes	0.475863	0.4043	0.920343	1.39075	no	-0.0263739	0.95975	0.999777	0.981885	no
SLC6A11	XLOC_033616	3:10857742-10982419	1.67171	0.0004	0.0123123	3.18592	yes	1.839	5e-05	0.00116756	3.57762	yes	0.930457	0.0351	0.373222	1.90588	no	0.94074	0.04735	0.63812	1.91951	no
PPL	XLOC_019378	16:4932507-5147809	1.67141	5e-05	0.00217877	3.18526	yes	1.97737	5e-05	0.00116756	3.93775	yes	0.484426	0.15795	0.716812	1.39903	no	-0.330114	0.45535	0.999777	0.795474	no
SLC29A4	XLOC_044366	7:5313999-5343696	1.66534	5e-05	0.00217877	3.17188	yes	1.9656	5e-05	0.00116756	3.90575	yes	0.191113	0.65705	0.987223	1.14164	no	-0.140062	0.74025	0.999777	0.90748	no
PTPRZ1	XLOC_045271	7:121513142-121702090	1.66108	0.0005	0.0147924	3.16253	yes	1.42916	0.00115	0.0173807	2.6929	yes	1.43251	0.0036	0.102203	2.69916	no	1.35721	0.00475	0.198212	2.56189	no
HCAR2	XLOC_012790	12:123011772-123215390	1.6511	5e-05	0.00217877	3.14073	yes	1.2913	5e-05	0.00116756	2.44748	yes	1.34314	5e-05	0.00369973	2.53703	yes	0.375996	0.24165	0.999777	1.29774	no
KRT6B	XLOC_012129	12:52840434-52845910	1.64842	5e-05	0.00217877	3.1349	yes	2.14311	5e-05	0.00116756	4.41713	yes	0.688564	0.02335	0.302441	1.61168	no	-0.0269636	0.9341	0.999777	0.981484	no
TGM2	XLOC_031440	20:36756781-36795085	1.6467	5e-05	0.00217877	3.13117	yes	2.30016	5e-05	0.00116756	4.92512	yes	0.147651	0.6029	0.978208	1.10776	no	-0.277956	0.34425	0.999777	0.824759	no
BAI1	XLOC_048036	8:143530790-143626370	1.63596	5e-05	0.00217877	3.10794	yes	2.35273	5e-05	0.00116756	5.1079	yes	0.0287689	0.93505	0.994059	1.02014	no	-0.568068	0.10015	0.829848	0.674519	no
SLC43A2	XLOC_021633	17:1477550-1532270	1.63343	5e-05	0.00217877	3.1025	yes	1.97704	5e-05	0.00116756	3.93685	yes	1.13895	0.0056	0.134545	2.20221	no	0.522193	0.2192	0.999777	1.43614	no
COL7A1	XLOC_035340	3:48601503-48632841	1.6312	5e-05	0.00217877	3.09771	yes	1.89552	5e-05	0.00116756	3.72056	yes	0.324488	0.28575	0.841253	1.25222	no	0.056029	0.85405	0.999777	1.0396	no
DLL1	XLOC_044310	6:170591293-170716153	1.62152	5e-05	0.00217877	3.07699	yes	2.05832	5e-05	0.00116756	4.16501	yes	0.376976	0.39095	0.911447	1.29862	no	-0.0385716	0.93605	0.999777	0.973618	no
OR56B1,TRIM22	XLOC_007367	11:5684424-5959849	1.62028	0.00035	0.0110556	3.07435	yes	1.7972	5e-05	0.00116756	3.47545	yes	2.1002	5e-05	0.00369973	4.28769	yes	0.951588	0.0339	0.549942	1.934	no
SYTL2	XLOC_009810	11:85405266-85522184	1.60974	0.0007	0.0194002	3.05197	yes	1.44571	0.0002	0.00389186	2.72397	yes	0.615792	1	1	1.5324	no	0.542489	1	1	1.45648	no
CKB	XLOC_015999	14:103985995-103989448	1.60394	5e-05	0.00217877	3.03972	yes	2.52134	5e-05	0.00116756	5.74115	yes	0.886267	0.00125	0.0509934	1.84839	no	0.329059	0.2775	0.999777	1.25619	no
ITGB2	XLOC_032385	21:46305863-46352271	1.60138	5e-05	0.00217877	3.03433	yes	1.82535	5e-05	0.00116756	3.54393	yes	0.649008	0.0194	0.270957	1.56809	no	0.191235	0.51335	0.999777	1.14174	no
PTP4A3	XLOC_048026	8:142400038-142442650	1.59966	5e-05	0.00217877	3.03072	yes	1.88222	5e-05	0.00116756	3.68642	yes	1.09427	0.00015	0.00993643	2.13505	yes	0.496858	0.087	0.787935	1.41114	no
TIMP1	XLOC_057009	X:47420512-47479252	1.59963	5e-05	0.00217877	3.03066	yes	2.91798	5e-05	0.00116756	7.55787	yes	0.0739095	0.7965	0.994059	1.05257	no	-0.590614	0.0499	0.651569	0.66406	no
MT1X	XLOC_018846	16:56716335-56721719	1.59118	5e-05	0.00217877	3.01296	yes	0.826323	0.00015	0.00305086	1.77316	yes	1.36993	5e-05	0.00369973	2.58458	yes	0.632842	0.0081	0.264041	1.55062	no
C3	XLOC_025562	19:6677714-6737614	1.58611	5e-05	0.00217877	3.00239	yes	1.88329	5e-05	0.00116756	3.68915	yes	0.306677	0.2507	0.814643	1.23686	no	-0.250625	0.35685	0.999777	0.840532	no
P2RY6	XLOC_008194	11:72975362-73010549	1.58138	5e-05	0.00217877	2.99256	yes	2.18578	5e-05	0.00116756	4.54973	yes	0.721872	0.0445	0.418836	1.64932	no	-0.416761	0.2769	0.999777	0.749105	no
ARRDC2	XLOC_024507	19:18111940-18142839	1.5743	5e-05	0.00217877	2.97791	yes	2.06961	5e-05	0.00116756	4.19773	yes	0.228936	0.4961	0.955454	1.17197	no	-0.254945	0.47	0.999777	0.838019	no
NYAP1	XLOC_045133	7:100081549-100092422	1.57127	0.001	0.0253363	2.97166	yes	1.35607	0.00045	0.00778592	2.55987	yes	0.669597	0.1186	0.64715	1.59063	no	-0.218362	0.62995	0.999777	0.859541	no
MYO15B	XLOC_021454	17:73584138-73704142	1.56809	0.00215	0.0458086	2.96512	yes	1.70754	0.00115	0.0173807	3.26603	yes	0.483724	0.30615	0.858887	1.39835	no	-0.107447	0.8419	0.999777	0.928229	no
HEATR6	XLOC_022657	17:58118567-58156292	1.56401	5e-05	0.00217877	2.95675	yes	-0.0512829	0.86065	0.996063	0.965078	no	3.54192	5e-05	0.00369973	11.6473	yes	0.267493	0.3455	0.999777	1.20371	no
MTSS1	XLOC_049112	8:125500725-125740795	1.5581	5e-05	0.00217877	2.94466	yes	1.49041	0.00015	0.00305086	2.80969	yes	0.917345	0.03715	0.382244	1.88864	no	0.725651	0.14495	0.925195	1.65365	no
KRT14	XLOC_022347	17:39738530-39743173	1.55698	5e-05	0.00217877	2.94237	yes	1.32174	5e-05	0.00116756	2.49967	yes	1.68973	5e-05	0.00369973	3.22596	yes	1.08617	0.0006	0.0573269	2.1231	no
BBC3	XLOC_026301	19:47724080-47736253	1.55373	5e-05	0.00217877	2.93575	yes	1.65021	5e-05	0.00116756	3.13879	yes	0.876129	0.0057	0.135775	1.83544	no	0.697349	0.03415	0.551415	1.62152	no
CILP2	XLOC_024547	19:19649056-19657468	1.54997	5e-05	0.00217877	2.92811	yes	2.0732	5e-05	0.00116756	4.20819	yes	-0.513424	0.1783	0.745292	0.700558	no	-0.350465	0.35765	0.999777	0.784331	no
TMEM143	XLOC_026323	19:48835612-48867494	1.54917	0.00015	0.00555	2.92649	yes	1.46518	5e-05	0.00116756	2.76098	yes	1.8985	0.0004	0.0218212	3.72825	yes	0.974054	0.0122	0.336691	1.96435	no
CCL5	XLOC_022206	17:34195970-34212867	1.54737	5e-05	0.00217877	2.92284	yes	1.35962	5e-05	0.00116756	2.56618	yes	1.49353	5e-05	0.00369973	2.81577	yes	-0.0934852	0.7012	0.999777	0.937256	no
GJB6	XLOC_013509	13:20796104-20806593	1.54562	0.00135	0.0317568	2.91929	yes	1.20687	0.00575	0.0634075	2.30836	no	1.57605	0.00095	0.0412983	2.98152	yes	0.698994	0.12685	0.892071	1.62337	no
ABCA1	XLOC_051214	9:107543282-107691173	1.54411	5e-05	0.00217877	2.91624	yes	1.5671	5e-05	0.00116756	2.96308	yes	1.02698	5e-05	0.00369973	2.03775	yes	1.16655	5e-05	0.00948904	2.24474	yes
CCDC88B	XLOC_007994	11:64107694-64125006	1.54219	0.0005	0.0147924	2.91236	yes	2.1973	5e-05	0.00116756	4.5862	yes	0.310052	0.5117	0.956685	1.23975	no	0.153014	0.7719	0.999777	1.11189	no
RARRES3	XLOC_007971	11:63304280-63313934	1.53822	0.00035	0.0110556	2.90436	yes	1.6843	0.0001	0.00213617	3.21384	yes	0.527032	0.21575	0.789998	1.44096	no	-0.512228	0.28525	0.999777	0.701139	no
OAS2	XLOC_011355	12:113344581-113455556	1.53411	0.001	0.0253363	2.8961	yes	1.56027	0.00075	0.0120877	2.94909	yes	1.71863	0.00065	0.0316159	3.29124	yes	0.339405	0.51355	0.999777	1.26523	no
IL8	XLOC_036962	4:74606222-74609433	1.52492	5e-05	0.00217877	2.87771	yes	1.05438	5e-05	0.00116756	2.07683	yes	1.32993	5e-05	0.00369973	2.5139	yes	0.415784	0.08745	0.787935	1.33402	no
ICOSLG	XLOC_032362	21:45642655-45660899	1.52162	5e-05	0.00217877	2.87113	yes	1.90005	5e-05	0.00116756	3.73226	yes	0.895693	0.01415	0.230223	1.8605	no	0.921319	0.0226	0.456415	1.89385	no
CSF3	XLOC_020950	17:38171613-38174067	1.52015	5e-05	0.00217877	2.86821	yes	1.48958	5e-05	0.00116756	2.80807	yes	1.59304	5e-05	0.00369973	3.01684	yes	0.967162	0.00285	0.14788	1.95499	no
MAPK15	XLOC_048067	8:144798428-144804628	1.51861	0.00195	0.0421054	2.86515	yes	2.10863	5e-05	0.00116756	4.31282	yes	1.25228	0.0114	0.201506	2.38218	no	1.048	0.051	0.659111	2.06766	no
RP11-380J14.1	XLOC_000277	1:17516277-17524138	1.51748	0.001	0.0253363	2.86291	yes	1.85482	5e-05	0.00116756	3.61707	yes	0.389657	1	1	1.31008	no	-0.0453997	1	1	0.969021	no
NT5M	XLOC_020557	17:17206648-17250977	1.51683	0.0017	0.0380711	2.86162	yes	1.21885	0.0072	0.0746098	2.32761	no	1.78711	0.00085	0.0383907	3.45123	yes	1.16638	0.02715	0.494266	2.24448	no
CEBPD	XLOC_048555	8:48649470-48651648	1.51627	5e-05	0.00217877	2.86051	yes	1.12514	5e-05	0.00116756	2.18123	yes	1.9073	5e-05	0.00369973	3.75106	yes	1.09662	5e-05	0.00948904	2.13853	yes
CRABP2	XLOC_004185	1:156669397-156675612	1.51348	5e-05	0.00217877	2.85498	yes	2.17199	5e-05	0.00116756	4.50645	yes	-0.0400168	0.8776	0.994059	0.972644	no	-1.2325	0.0001	0.0162988	0.425579	yes
EBI3	XLOC_024181	19:4229304-4237528	1.49784	5e-05	0.00217877	2.8242	yes	1.7638	5e-05	0.00116756	3.39591	yes	0.348682	0.28885	0.84647	1.2734	no	-0.978677	0.0112	0.320588	0.507445	no
BEX1	XLOC_058561	X:102317578-102319168	1.48205	0.0008	0.021236	2.79345	yes	1.32932	0.0009	0.0140464	2.51284	yes	0.239884	0.585	0.977124	1.1809	no	0.403761	0.3597	0.999777	1.32295	no
AC004383.4,MIR424,MIR503	XLOC_058779	X:133677184-133680930	1.47854	0.00015	0.00555	2.78667	yes	1.73473	5e-05	0.00116756	3.32817	yes	1.21684	0.0028	0.0875299	2.32437	no	1.64623	5e-05	0.00948904	3.13015	yes
ADTRP	XLOC_043054	6:11711634-11807345	1.47634	5e-05	0.00217877	2.78242	yes	1.51578	5e-05	0.00116756	2.85953	yes	0.837794	0.00725	0.157095	1.78732	no	0.286544	0.35145	0.999777	1.21971	no
NFASC	XLOC_002164	1:204797778-204991950	1.47539	0.00035	0.0110556	2.78059	yes	2.16734	5e-05	0.00116756	4.49194	yes	-0.477012	1	1	0.718464	no	-0.564896	0.20115	0.998471	0.676004	no
FBLN5	XLOC_015872	14:92335710-92414331	1.47039	0.00035	0.0110556	2.77097	yes	2.2404	5e-05	0.00116756	4.72528	yes	0.345377	0.42115	0.930678	1.27048	no	-0.107898	0.81725	0.999777	0.927939	no
ABCC3	XLOC_021201	17:48712137-48769613	1.46716	0.001	0.0253363	2.76477	yes	2.27388	5e-05	0.00116756	4.83622	yes	-0.0231629	0.9563	0.994311	0.984073	no	-0.992739	0.0212	0.44643	0.502523	no
ARHGAP25	XLOC_027100	2:68906732-69053965	1.4587	5e-05	0.00217877	2.74861	yes	1.66054	5e-05	0.00116756	3.16135	yes	0.888088	0.00445	0.117465	1.85072	no	0.72777	0.0225	0.456415	1.65608	no
ZC3H12A	XLOC_000584	1:37940152-37950174	1.45521	5e-05	0.00217877	2.74196	yes	1.19941	5e-05	0.00116756	2.29646	yes	1.05801	5e-05	0.00369973	2.08206	yes	0.307495	0.1954	0.992692	1.23756	no
STC1	XLOC_048359	8:23699427-23712320	1.44951	0.0011	0.0272495	2.73115	yes	-0.99081	0.035	0.241791	0.503195	no	1.73925	0.0001	0.00706142	3.33862	yes	-1.00929	0.05475	0.671245	0.496791	no
C14orf80,CRIP1	XLOC_015156	14:105952653-105965912	1.44024	5e-05	0.00217877	2.71366	yes	1.95244	5e-05	0.00116756	3.87029	yes	0.0737082	0.82295	0.994059	1.05242	no	0.247042	0.4401	0.999777	1.18677	no
COL8A2	XLOC_003116	1:36560836-36591273	1.43981	5e-05	0.00217877	2.71285	yes	1.50509	5e-05	0.00116756	2.83842	yes	0.552539	0.11725	0.64469	1.46666	no	0.137171	0.7064	0.999777	1.09975	no
ADAMTSL4,AL356356.1	XLOC_001507	1:150521039-150533413	1.43617	5e-05	0.00217877	2.70602	yes	2.10276	5e-05	0.00116756	4.2953	yes	0.529225	0.14965	0.709021	1.44315	no	0.202985	0.58635	0.999777	1.15108	no
ANKRD65	XLOC_002650	1:1353799-1358071	1.43323	5e-05	0.00217877	2.70051	yes	1.76347	5e-05	0.00116756	3.39514	yes	1.18119	5e-05	0.00369973	2.26764	yes	0.459452	0.1094	0.854747	1.37502	no
ALDH1L1	XLOC_035799	3:125822411-125929012	1.41594	0.0024	0.049958	2.66834	yes	4.91896	5e-05	0.00116756	30.252	yes	0.118289	1	1	1.08545	no	0.018596	1	1	1.01297	no
ZP3	XLOC_044966	7:76018650-76071388	1.41439	5e-05	0.00217877	2.66547	yes	1.53969	5e-05	0.00116756	2.90732	yes	1.39517	5e-05	0.00369973	2.6302	yes	0.705211	0.01795	0.414465	1.63038	no
NEURL1B	XLOC_040072	5:172068225-172124723	1.41179	5e-05	0.00217877	2.66067	yes	1.76261	5e-05	0.00116756	3.39311	yes	0.368169	0.3197	0.867826	1.29071	no	0.323666	0.39095	0.999777	1.25151	no
SOCS3	XLOC_022882	17:76352855-76356158	1.39602	5e-05	0.00217877	2.63175	yes	1.59853	5e-05	0.00116756	3.02835	yes	0.650137	0.0265	0.327973	1.56932	no	-0.10175	0.75065	0.999777	0.931902	no
HEPHL1	XLOC_008378	11:93754526-93846917	1.39074	5e-05	0.00217877	2.62213	yes	0.906442	5e-05	0.00116756	1.87442	yes	0.686258	0.0053	0.131423	1.6091	no	-0.399229	0.1107	0.857739	0.758263	no
BIRC3	XLOC_008427	11:102188214-102210134	1.38747	5e-05	0.00217877	2.61619	yes	1.27909	5e-05	0.00116756	2.42686	yes	1.71146	5e-05	0.00369973	3.27492	yes	1.48717	5e-05	0.00948904	2.80339	yes
NCCRP1	XLOC_024830	19:39687600-39692524	1.38722	5e-05	0.00217877	2.61574	yes	2.14544	5e-05	0.00116756	4.42427	yes	-0.228414	0.43495	0.935643	0.853573	no	-1.11294	0.0014	0.0989571	0.462351	no
PROS1	XLOC_035599	3:93591880-93692917	1.38615	5e-05	0.00217877	2.6138	yes	1.57517	5e-05	0.00116756	2.97971	yes	0.616995	0.08695	0.578076	1.53368	no	0.462719	0.1868	0.980275	1.37814	no
ARRDC3	XLOC_040873	5:90664540-90679176	1.38218	5e-05	0.00217877	2.60662	yes	0.811505	0.00585	0.0643248	1.75504	no	2.2713	5e-05	0.00369973	4.82758	yes	1.58843	5e-05	0.00948904	3.00722	yes
CTC-340A15.2	XLOC_040028	5:163723701-164598649	1.38028	0.00125	0.0299896	2.60319	yes	0.473389	0.269	0.757443	1.38837	no	0.829425	0.0565	0.474754	1.77698	no	0.20415	1	1	1.15201	no
CXCL2	XLOC_038141	4:74962792-74965010	1.37698	0.00015	0.00555	2.59724	yes	0.250908	0.4662	0.922786	1.18996	no	1.81205	5e-05	0.00369973	3.51141	yes	0.995957	0.0097	0.294701	1.9944	no
DPP4	XLOC_029794	2:162848558-162931679	1.37567	0.0001	0.00393125	2.59488	yes	0.592026	0.0852	0.433367	1.50736	no	0.986376	0.00835	0.170568	1.9812	no	-0.0709236	0.85395	0.999777	0.952028	no
VGF	XLOC_046511	7:100805789-100810485	1.3645	0.0005	0.0147924	2.57487	yes	2.64178	5e-05	0.00116756	6.24101	yes	-0.0969534	0.82625	0.994059	0.935005	no	-0.0747055	0.8615	0.999777	0.949536	no
CHST2	XLOC_034561	3:142838132-142841800	1.35358	5e-05	0.00217877	2.55545	yes	1.31033	5e-05	0.00116756	2.47998	yes	0.788999	0.01335	0.222143	1.72788	no	-0.105351	0.7536	0.999777	0.929579	no
MYH14	XLOC_025087	19:50691442-50813802	1.35173	5e-05	0.00217877	2.55218	yes	1.86522	5e-05	0.00116756	3.64323	yes	-0.0887453	0.735	0.994059	0.94034	no	-0.701237	0.02685	0.493342	0.615045	no
WNT7B	XLOC_033494	22:46316240-46373009	1.35157	5e-05	0.00217877	2.5519	yes	1.81355	5e-05	0.00116756	3.51506	yes	0.27983	0.3881	0.910611	1.21405	no	-0.0254991	0.9405	0.999777	0.982481	no
THEMIS2	XLOC_000460	1:28199054-28213196	1.34933	5e-05	0.00217877	2.54794	yes	2.35619	5e-05	0.00116756	5.12016	yes	-0.0155844	0.96215	0.99475	0.989256	no	-0.515703	0.1608	0.947611	0.699452	no
PLEKHB1	XLOC_008203	11:73357222-73373864	1.34641	0.00225	0.0475888	2.54279	yes	2.9252	5e-05	0.00116756	7.59579	yes	-2.4392	1	1	0.184386	no	-1.29849	1	1	0.406551	no
EDN1	XLOC_041681	6:12261522-12297427	1.34428	5e-05	0.00217877	2.53903	yes	1.7238	5e-05	0.00116756	3.30305	yes	1.44307	5e-05	0.00369973	2.71899	yes	1.11269	0.0004	0.0432938	2.16248	yes
ITGB6	XLOC_029782	2:160956176-161128399	1.34292	5e-05	0.00217877	2.53664	yes	1.31139	5e-05	0.00116756	2.48181	yes	0.861041	0.0002	0.0127624	1.81635	yes	0.323107	0.1566	0.941292	1.25102	no
SDR16C5	XLOC_048612	8:57212568-57233335	1.34068	0.0001	0.00393125	2.53271	yes	1.23792	0.00015	0.00305086	2.35858	yes	1.28955	0.0004	0.0218212	2.44452	yes	0.27441	0.44485	0.999777	1.2095	no
ISG15	XLOC_000032	1:948802-949920	1.34024	5e-05	0.00217877	2.53193	yes	1.68419	5e-05	0.00116756	3.2136	yes	1.12817	5e-05	0.00369973	2.18581	yes	0.0955849	0.6559	0.999777	1.0685	no
RAB26	XLOC_018225	16:2190803-2204166	1.33676	0.0008	0.021236	2.52583	yes	1.96855	5e-05	0.00116756	3.91375	yes	0.0222944	0.9619	0.99475	1.01557	no	-0.358294	0.41025	0.999777	0.780086	no
SARDH	XLOC_051513	9:136527499-136605077	1.32818	0.0002	0.00707433	2.51086	yes	2.14883	5e-05	0.00116756	4.43468	yes	-0.580763	0.15675	0.716095	0.66861	no	-0.564731	0.1585	0.945676	0.676081	no
ALDH3B2	XLOC_009579	11:67429628-67448671	1.32534	5e-05	0.00217877	2.50592	yes	1.5751	5e-05	0.00116756	2.97956	yes	0.272396	0.3655	0.895363	1.20781	no	-0.429714	0.1772	0.974991	0.742409	no
NRP2	XLOC_028178	2:206546713-206662857	1.31539	0.00045	0.0134786	2.4887	yes	1.22555	0.0011	0.0167408	2.33845	yes	1.7097	5e-05	0.00369973	3.27093	yes	1.13037	0.0033	0.160415	2.18915	no
OVOL1	XLOC_008040	11:65554492-65564690	1.31465	0.00035	0.0110556	2.48742	yes	2.13548	5e-05	0.00116756	4.39383	yes	0.448826	0.21135	0.783606	1.36493	no	-0.691885	0.07545	0.743337	0.619044	no
IL1B	XLOC_029483	2:113587327-113594480	1.30209	5e-05	0.00217877	2.46586	yes	0.664235	0.00395	0.0472363	1.58473	yes	1.04313	0.00015	0.00993643	2.06069	yes	0.801574	0.001	0.0810175	1.743	no
LAT2	XLOC_044930	7:73613981-73644164	1.2991	5e-05	0.00217877	2.46075	yes	2.30793	5e-05	0.00116756	4.95172	yes	-1.3958	5e-05	0.00369973	0.380034	yes	-1.68076	5e-05	0.00948904	0.311918	yes
HR	XLOC_048329	8:21971886-21990897	1.29877	5e-05	0.00217877	2.46019	yes	1.897	5e-05	0.00116756	3.72438	yes	0.0212236	0.93845	0.994059	1.01482	no	-0.552243	0.0473	0.638066	0.681959	no
RHOV	XLOC_017439	15:41164411-41166487	1.29762	0.00155	0.0350921	2.45823	yes	1.35354	0.0003	0.00552166	2.55538	yes	0.300262	0.46255	0.945242	1.23137	no	0.00193835	0.98485	0.999777	1.00134	no
INHBA	XLOC_046006	7:41706765-41818986	1.29484	5e-05	0.00217877	2.4535	yes	1.00335	5e-05	0.00116756	2.00465	yes	1.14915	5e-05	0.00369973	2.21783	yes	0.909869	0.00105	0.0836017	1.87887	no
ISG20	XLOC_017052	15:89179383-89199714	1.28453	5e-05	0.00217877	2.43603	yes	1.63754	5e-05	0.00116756	3.11135	yes	0.386914	0.20915	0.782728	1.30759	no	-0.641417	0.0665	0.70597	0.641083	no
ARMCX1	XLOC_057409	X:100805503-100809683	1.2772	0.0002	0.00707433	2.42368	yes	1.23186	0.00015	0.00305086	2.3487	yes	0.43391	0.1884	0.757904	1.35089	no	0.374626	0.2573	0.999777	1.2965	no
XDH	XLOC_028777	2:31521812-31637609	1.27637	5e-05	0.00217877	2.42229	yes	1.07598	5e-05	0.00116756	2.10815	yes	0.779127	0.00045	0.0238021	1.71609	yes	0.845267	0.0003	0.0364579	1.7966	yes
GGT6	XLOC_021700	17:4460221-4464113	1.27447	0.00095	0.0245422	2.4191	yes	1.81342	5e-05	0.00116756	3.51474	yes	-0.45229	0.2826	0.839974	0.730882	no	-1.11507	0.01535	0.383592	0.461669	no
COL6A2	XLOC_032020	21:47518010-47552763	1.26936	5e-05	0.00217877	2.41055	yes	2.25562	5e-05	0.00116756	4.77539	yes	-0.290606	0.28755	0.844083	0.817559	no	-0.592785	0.0237	0.466692	0.663062	no
ARRDC4	XLOC_017156	15:98462783-98517068	1.26907	5e-05	0.00217877	2.41006	yes	1.03398	0.0001	0.00213617	2.04767	yes	1.29098	5e-05	0.00369973	2.44694	yes	1.36156	5e-05	0.00948904	2.56963	yes
CTD-2587H24.4,DNAAF3,TNNI3	XLOC_026531	19:55663136-55691809	1.26151	0.00095	0.0245422	2.39747	yes	1.35244	0.00045	0.00778592	2.55344	yes	0.526825	0.16765	0.729023	1.44075	no	0.473776	0.21085	0.999777	1.38874	no
APOL6	XLOC_032818	22:36044249-36064445	1.26085	5e-05	0.00217877	2.39637	yes	1.092	5e-05	0.00116756	2.13169	yes	1.51622	5e-05	0.00369973	2.86041	yes	0.773852	0.00375	0.173175	1.70983	no
ERRFI1	XLOC_002724	1:8064463-8086368	1.25778	5e-05	0.00217877	2.39127	yes	0.843466	5e-05	0.00116756	1.79436	yes	1.74214	5e-05	0.00369973	3.34531	yes	1.25035	5e-05	0.00948904	2.37899	yes
PIM3	XLOC_032997	22:50354160-50357728	1.25757	5e-05	0.00217877	2.39093	yes	1.60566	5e-05	0.00116756	3.04335	yes	0.890385	0.0005	0.0257611	1.85367	yes	0.501393	0.04685	0.63571	1.41558	no
CNFN	XLOC_026188	19:42891170-42894439	1.25187	0.0004	0.0123123	2.3815	yes	3.78965	5e-05	0.00116756	13.8292	yes	-0.407765	0.2997	0.852582	0.75379	no	-0.320227	0.43195	0.999777	0.800944	no
IL12RB2	XLOC_000938	1:67773046-67867182	1.24963	0.0018	0.0395754	2.3778	yes	1.15308	0.0013	0.0191556	2.22388	yes	1.54243	0.00015	0.00993643	2.91285	yes	1.02144	0.023	0.460465	2.02994	no
KLF9	XLOC_050968	9:72999502-73029540	1.24669	5e-05	0.00217877	2.37296	yes	1.39373	5e-05	0.00116756	2.62757	yes	0.75978	0.00825	0.169772	1.69323	no	0.449133	0.12045	0.87541	1.36522	no
SLC17A7	XLOC_026360	19:49932657-49945617	1.24619	0.0001	0.00393125	2.37214	yes	1.75158	5e-05	0.00116756	3.36727	yes	-1.01598	0.0111	0.198729	0.494492	no	-1.51805	0.001	0.0810175	0.349158	no
SERPINE2	XLOC_030263	2:224839828-224904036	1.246	5e-05	0.00217877	2.37183	yes	1.14072	5e-05	0.00116756	2.20491	yes	1.21545	5e-05	0.00369973	2.32213	yes	0.662999	0.0049	0.20025	1.58337	no
GP1BB,SEPT5	XLOC_032483	22:19701986-19712295	1.24487	0.0005	0.0147924	2.36997	yes	1.79008	5e-05	0.00116756	3.45834	yes	-0.686346	0.0637	0.503197	0.621426	no	-0.283475	0.4751	0.999777	0.82161	no
NLRP3	XLOC_002553	1:247579169-247612592	1.24279	0.0001	0.00393125	2.36656	yes	1.58599	5e-05	0.00116756	3.00214	yes	0.85614	0.0098	0.18675	1.81019	no	0.310521	0.363	0.999777	1.24016	no
FCGRT	XLOC_025066	19:50010072-50029590	1.24104	5e-05	0.00217877	2.36369	yes	1.2082	5e-05	0.00116756	2.31049	yes	0.346467	0.22625	0.796067	1.27144	no	-0.0853817	0.77805	0.999777	0.942535	no
2016-09-03	XLOC_032925	22:42372275-42394225	1.24021	0.00145	0.0334031	2.36233	yes	1.85352	00:00:04.320000	0.00116756	3.61381	yes	0.361646	0.3799	0.906446	1.28489	no	0.102756	0.8287	0.999777	1.07382	no
CTD-2228K2.7	XLOC_038894	5:473363-524447	1.23895	0.0002	0.00707433	2.36027	yes	1.39382	5e-05	0.00116756	2.62774	yes	0.264065	0.437	0.935745	1.20086	no	0.102236	0.7585	0.999777	1.07344	no
BTG2	XLOC_002143	1:203274618-203278730	1.22463	5e-05	0.00217877	2.33696	yes	2.16935	5e-05	0.00116756	4.49821	yes	0.369858	0.15845	0.716812	1.29223	no	-0.479721	0.06695	0.709105	0.717116	no
NRARP	XLOC_051593	9:140194082-140196703	1.22257	0.0004	0.0123123	2.33362	yes	1.94734	5e-05	0.00116756	3.85663	yes	0.576734	0.0977	0.601557	1.49147	no	0.260668	0.4602	0.999777	1.19803	no
DNAJB5	XLOC_049541	9:34989637-34998897	1.21871	5e-05	0.00217877	2.32739	yes	1.44366	5e-05	0.00116756	2.7201	yes	-0.0208148	0.94315	0.994059	0.985676	no	-0.313715	0.2686	0.999777	0.804567	no
DLX3	XLOC_022550	17:48067368-48072588	1.21721	0.0003	0.0100233	2.32497	yes	1.86131	5e-05	0.00116756	3.63337	yes	0.417988	0.20025	0.773968	1.33606	no	-0.203694	0.56115	0.999777	0.868324	no
CSPG4	XLOC_017852	15:75966662-76005203	1.20828	5e-05	0.00217877	2.31062	yes	1.53059	5e-05	0.00116756	2.88904	yes	0.522545	0.02215	0.292342	1.43649	no	0.367388	0.11755	0.866059	1.29002	no
KLF10	XLOC_048985	8:103661006-103668130	1.207	5e-05	0.00217877	2.30857	yes	1.27686	5e-05	0.00116756	2.42311	yes	0.654634	0.0029	0.0896487	1.57422	no	0.676496	0.00255	0.139085	1.59825	no
SLC12A7	XLOC_040238	5:1050498-1112150	1.19815	0.00195	0.0421054	2.29445	yes	1.85616	5e-05	0.00116756	3.62043	yes	-0.113536	0.7733	0.994059	0.92432	no	-0.532973	0.17725	0.974991	0.691129	no
NID1	XLOC_004953	1:236139129-236228630	1.19673	0.0002	0.00707433	2.2922	yes	1.28933	5e-05	0.00116756	2.44415	yes	1.44602	5e-05	0.00369973	2.72455	yes	0.752706	0.03365	0.549101	1.68495	no
PCDH20	XLOC_013826	13:61983990-62002220	1.19578	5e-05	0.00217877	2.29069	yes	2.12834	5e-05	0.00116756	4.37214	yes	-0.347606	0.3321	0.873647	0.785887	no	-0.353284	0.3172	0.999777	0.7828	no
SLCO4A1	XLOC_031021	20:61272070-61317137	1.18077	0.00055	0.0161397	2.26698	yes	2.39055	5e-05	0.00116756	5.24357	yes	0.487186	0.2392	0.804613	1.40171	no	-0.611966	0.12445	0.885532	0.654304	no
ASS1	XLOC_050309	9:133320093-133376661	1.17992	5e-05	0.00217877	2.26564	yes	1.28302	5e-05	0.00116756	2.43348	yes	0.811392	0.00015	0.00993643	1.7549	yes	-0.20388	0.3355	0.999777	0.868212	no
CTSD,IFITM10,RP11-295K3.1	XLOC_008784	11:1753639-1785255	1.17879	5e-05	0.00217877	2.26387	yes	1.21994	5e-05	0.00116756	2.32937	yes	-0.0393992	0.8579	0.994059	0.97306	no	-0.35302	0.1004	0.829848	0.782943	no
ZFP36L2	XLOC_028865	2:43393799-43823185	1.17756	5e-05	0.00217877	2.26194	yes	1.25421	5e-05	0.00116756	2.38536	yes	0.622794	0.01025	0.191908	1.53985	no	0.215761	0.38805	0.999777	1.16132	no
SV2A	XLOC_004010	1:149874869-149889434	1.17573	0.0013	0.0309837	2.25907	yes	1.46697	0.0001	0.00213617	2.76441	yes	0.268282	0.48155	0.951972	1.20437	no	-0.244282	0.5454	0.999777	0.844236	no
PPP1R14C	XLOC_042809	6:150464211-150571493	1.17227	5e-05	0.00217877	2.25366	yes	0.87503	0.0002	0.00389186	1.83405	yes	1.26581	5e-05	0.00369973	2.40462	yes	0.711427	0.00485	0.199382	1.63742	no
STARD5	XLOC_017912	15:81451915-81616524	1.17225	0.001	0.0253363	2.25363	yes	0.671473	0.0542	0.324077	1.5927	no	1.67509	5e-05	0.00369973	3.19339	yes	0.319754	0.36815	0.999777	1.24812	no
SYT7	XLOC_009415	11:61281192-61355840	1.17152	5e-05	0.00217877	2.25249	yes	1.45664	5e-05	0.00116756	2.74468	yes	0.249163	0.385	0.91022	1.18852	no	0.142021	0.6368	0.999777	1.10345	no
CXCL1	XLOC_036965	4:74735109-74736959	1.17124	5e-05	0.00217877	2.25205	yes	0.732178	0.0004	0.00703218	1.66114	yes	1.2288	5e-05	0.00369973	2.34372	yes	0.66036	0.00355	0.166718	1.58048	no
COL12A1	XLOC_043706	6:75794041-75915767	1.16997	0.0002	0.00707433	2.25007	yes	1.24961	5e-05	0.00116756	2.37777	yes	0.635678	0.0113	0.200759	1.55367	no	0.297978	0.257	0.999777	1.22942	no
CPT1A	XLOC_009604	11:68522087-68611878	1.16741	5e-05	0.00217877	2.24608	yes	1.69257	5e-05	0.00116756	3.23232	yes	0.12843	0.704	0.994059	1.0931	no	-0.052015	0.85815	0.999777	0.964588	no
DDX60	XLOC_038724	4:169137442-169239958	1.16637	5e-05	0.00217877	2.24446	yes	1.02194	5e-05	0.00116756	2.03065	yes	1.13051	5e-05	0.00369973	2.18936	yes	0.426171	0.04665	0.634862	1.34366	no
SH3BP2	XLOC_036452	4:2794749-2842825	1.16566	0.00035	0.0110556	2.24336	yes	1.1375	0.0006	0.0100295	2.19999	yes	0.938217	0.0036	0.102203	1.91616	no	0.635198	0.0705	0.722416	1.55315	no
ATP2A3	XLOC_021691	17:3827161-3867775	1.16499	0.00025	0.00863186	2.24232	yes	2.32317	5e-05	0.00116756	5.00431	yes	-0.364721	0.3198	0.867826	0.776619	no	-0.775735	0.03495	0.559119	0.584091	no
APOL3	XLOC_033330	22:36536371-36562225	1.16203	0.00135	0.0317568	2.23772	yes	1.17911	0.00035	0.00629054	2.26437	yes	0.834648	0.03085	0.350888	1.78342	no	0.203468	0.55195	0.999777	1.15146	no
FGFR3	XLOC_036440	4:1795033-1810599	1.15924	0.0017	0.0380711	2.2334	yes	1.13333	0.0023	0.0304312	2.19364	yes	0.97463	0.0054	0.13272	1.96514	no	0.418142	0.1889	0.981996	1.33621	no
GADD45B	XLOC_024145	19:2476119-2478257	1.15611	5e-05	0.00217877	2.22856	yes	1.31274	5e-05	0.00116756	2.48413	yes	0.675909	0.0053	0.131423	1.5976	no	0.379951	0.1267	0.891469	1.3013	no
SREBF1	XLOC_021910	17:17584786-17740325	1.15395	0.00085	0.0221967	2.22522	yes	1.58974	5e-05	0.00116756	3.00995	yes	0.291296	0.3582	0.890125	1.22374	no	0.512084	0.24815	0.999777	1.42611	no
TSC22D3	XLOC_058599	X:106956450-107038973	1.15009	5e-05	0.00217877	2.21928	yes	0.306994	0.16265	0.613042	1.23713	no	1.79234	5e-05	0.00369973	3.46376	yes	1.34758	5e-05	0.00948904	2.54485	yes
COL27A1	XLOC_050129	9:116917741-117074791	1.14933	0.00015	0.00555	2.21811	yes	1.40383	5e-05	0.00116756	2.64603	yes	0.504611	0.14615	0.701544	1.41874	no	0.199144	0.56505	0.999777	1.14802	no
IL1RAP	XLOC_034894	3:190231839-190375843	1.14642	0.0006	0.0171885	2.21364	yes	0.799841	0.01075	0.100872	1.74091	no	1.31305	0.0003	0.0174615	2.48466	yes	1.00681	0.00385	0.174878	2.00946	no
GBP1	XLOC_003585	1:89518001-89531043	1.14628	5e-05	0.00217877	2.21342	yes	0.950178	0.0001	0.00213617	1.93211	yes	0.972742	5e-05	0.00369973	1.96257	yes	-0.00307835	0.991	0.999777	0.997869	no
SIK1	XLOC_032347	21:44834394-44847008	1.13589	5e-05	0.00217877	2.19754	yes	1.48488	5e-05	0.00116756	2.79894	yes	0.416001	0.0762	0.545277	1.33422	no	0.245915	0.28045	0.999777	1.18584	no
MX2	XLOC_031940	21:42733869-42781557	1.13086	5e-05	0.00217877	2.18989	yes	1.7378	5e-05	0.00116756	3.33526	yes	1.73872	5e-05	0.00369973	3.33739	yes	0.678091	0.01345	0.354252	1.60002	no
AEBP1	XLOC_044661	7:44143846-44154161	1.1128	0.0001	0.00393125	2.16265	yes	1.36357	5e-05	0.00116756	2.57321	yes	0.658273	0.0251	0.318292	1.57819	no	0.34476	0.23415	0.999777	1.26994	no
RP11-178A10.1	XLOC_005389	10:42970987-42990784	1.10738	0.0008	0.021236	2.15454	yes	0.700563	0.03285	0.230795	1.62514	no	1.1697	0.0014	0.0554855	2.24965	no	0.463877	0.2125	0.999777	1.37924	no
TFEB	XLOC_043472	6:41651715-41703997	1.10285	0.00035	0.0110556	2.14779	yes	1.66089	5e-05	0.00116756	3.16212	yes	0.709568	0.02195	0.290529	1.63531	no	0.521553	0.10135	0.829848	1.4355	no
LGALS7B	XLOC_024822	19:39279829-39282395	1.09607	5e-05	0.00217877	2.13772	yes	1.12756	5e-05	0.00116756	2.18489	yes	0.739871	0.00555	0.133574	1.67003	no	-0.00360743	0.98975	0.999777	0.997503	no
FHL1	XLOC_057691	X:135229558-135293518	1.09382	5e-05	0.00217877	2.13438	yes	1.06458	5e-05	0.00116756	2.09156	yes	1.40193	5e-05	0.00369973	2.64255	yes	0.827377	0.0019	0.123003	1.77446	no
HCLS1	XLOC_035754	3:121350245-121379779	1.09252	0.00015	0.00555	2.13246	yes	1.09917	5e-05	0.00116756	2.14231	yes	0.991058	0.00075	0.0347775	1.98764	yes	0.543636	0.0614	0.695486	1.45764	no
NOTCH3	XLOC_025753	19:15270443-15311804	1.08836	0.0019	0.0415216	2.12632	yes	1.81592	5e-05	0.00116756	3.52084	yes	-0.0856619	0.83015	0.994059	0.942352	no	-1.35617	0.00795	0.262635	0.390618	no
MX1	XLOC_031941	21:42792230-42831141	1.07599	0.00015	0.00555	2.10817	yes	1.25022	5e-05	0.00116756	2.37878	yes	1.46753	5e-05	0.00369973	2.76548	yes	0.320721	0.2158	0.999777	1.24895	no
NOXA1	XLOC_050443	9:140317801-140336268	1.07544	0.0008	0.021236	2.10736	yes	1.17397	0.0005	0.0085927	2.25632	yes	0.520474	0.11665	0.64317	1.43443	no	-0.149099	0.6902	0.999777	0.901813	no
MPP2	XLOC_022407	17:41952724-41987068	1.07462	0.0006	0.0171885	2.10617	yes	2.02235	5e-05	0.00116756	4.06245	yes	-0.468736	0.1884	0.757904	0.722597	no	0.0528259	0.8775	0.999777	1.03729	no
HMOX1	XLOC_032815	22:35776341-35790207	1.07307	5e-05	0.00217877	2.10391	yes	3.8315	5e-05	0.00116756	14.2363	yes	-0.795535	0.0077	0.162049	0.576129	no	-0.713252	0.01515	0.382874	0.609944	no
BCAM	XLOC_024951	19:45312294-45324673	1.07242	5e-05	0.00217877	2.10296	yes	1.01977	5e-05	0.00116756	2.0276	yes	0.752155	0.0014	0.0554855	1.68431	no	0.126854	0.5844	0.999777	1.09191	no
SLC6A6	XLOC_033642	3:14444075-14583588	1.07184	0.0001	0.00393125	2.10211	yes	1.89575	5e-05	0.00116756	3.72115	yes	-0.19414	0.5072	0.956416	0.874094	no	-0.296995	0.31785	0.999777	0.813946	no
CCDC144A	XLOC_020542	17:16592850-16707797	1.06609	0.00125	0.0299896	2.09375	yes	0.796798	0.00935	0.0908566	1.73724	no	0.640471	0.06295	0.50148	1.55884	no	0.384913	0.23865	0.999777	1.30578	no
ARMCX3	XLOC_057411	X:100877786-100883508	1.06323	0.0013	0.0309837	2.0896	yes	1.12171	0.0004	0.00703218	2.17605	yes	0.596603	0.07435	0.541793	1.51215	no	0.203989	0.56395	0.999777	1.15188	no
SLITRK6	XLOC_013907	13:86366924-86373623	1.06129	0.0006	0.0171885	2.0868	yes	0.732013	0.0082	0.0824583	1.66096	no	0.0904435	0.7801	0.994059	1.0647	no	-0.174393	0.60415	0.999777	0.88614	no
PDPN	XLOC_000223	1:13909959-13944452	1.05786	0.00025	0.00863186	2.08184	yes	0.901855	0.00045	0.00778592	1.86847	yes	0.612155	0.03305	0.360878	1.52854	no	0.516561	0.0803	0.756787	1.43054	no
IFITM3	XLOC_008746	11:319668-321340	1.05496	5e-05	0.00217877	2.07766	yes	1.1138	5e-05	0.00116756	2.16415	yes	1.06246	5e-05	0.00369973	2.08849	yes	0.461489	0.03675	0.573996	1.37696	no
FGFR1	XLOC_048479	8:38268655-38326352	1.05319	0.001	0.0253363	2.07511	yes	1.75024	5e-05	0.00116756	3.36415	yes	-0.0182819	0.95255	0.994059	0.987408	no	0.386071	0.27045	0.999777	1.30683	no
PHGDH	XLOC_001348	1:120202420-120286838	1.05247	0.0002	0.00707433	2.07408	yes	0.136714	0.61	0.975547	1.0994	no	1.63078	5e-05	0.00369973	3.0968	yes	0.889356	0.0023	0.135592	1.85235	no
CHAC1	XLOC_016528	15:41245159-41248710	1.04564	0.00085	0.0221967	2.06428	yes	0.735661	0.01085	0.101686	1.66516	no	1.77538	5e-05	0.00369973	3.42328	yes	1.67777	5e-05	0.00948904	3.19933	yes
FCHO1	XLOC_024499	19:17858526-17899377	1.04354	0.00015	0.00555	2.06128	yes	1.49568	5e-05	0.00116756	2.81997	yes	0.570962	0.0717	0.532809	1.48551	no	0.920858	0.0053	0.209789	1.89324	no
IL1RN	XLOC_027556	2:113864790-113891593	1.04142	5e-05	0.00217877	2.05825	yes	1.42016	5e-05	0.00116756	2.67615	yes	0.260687	0.34535	0.880367	1.19805	no	-0.526314	0.07525	0.743337	0.694326	no
WNT10A	XLOC_028299	2:219745084-219764303	1.03711	5e-05	0.00217877	2.05211	yes	1.38936	5e-05	0.00116756	2.61962	yes	0.774516	0.00555	0.133574	1.71062	no	0.0659513	0.8163	0.999777	1.04677	no
LY6E	XLOC_048047	8:144063154-144105249	1.03394	5e-05	0.00217877	2.04761	yes	1.06835	5e-05	0.00116756	2.09703	yes	1.25676	5e-05	0.00369973	2.38958	yes	0.639061	0.0041	0.180896	1.55732	no
PEMT	XLOC_021906	17:17408876-17513799	1.03336	0.0004	0.0123123	2.04679	yes	0.853107	0.00255	0.0331089	1.80639	yes	1.32628	5e-05	0.00369973	2.50755	yes	1.11019	0.0006	0.0573269	2.15874	no
OAS3	XLOC_011354	12:113344581-113455556	1.0182	0.00125	0.0299896	2.02539	yes	1.05208	0.00055	0.00932622	2.07352	yes	1.06771	0.0016	0.0608131	2.0961	no	0.386465	0.2121	0.999777	1.30719	no
KRT81,KRT83	XLOC_012123	12:52626303-52715182	1.01396	0.0007	0.0194002	2.01945	yes	0.777259	0.01745	0.144896	1.71387	no	0.277204	0.37725	0.905439	1.21184	no	0.15982	0.6072	0.999777	1.11715	no
RN7SL2	XLOC_015487	14:50329270-50329567	1.00995	5e-05	0.00217877	2.01384	yes	1.8622	5e-05	0.00116756	3.63562	yes	2.11956	5e-05	0.00369973	4.34561	yes	1.46605	5e-05	0.00948904	2.76264	yes
PTAFR	XLOC_003024	1:28473459-28520459	1.00524	5e-05	0.00217877	2.00728	yes	1.50456	5e-05	0.00116756	2.83738	yes	-0.610195	0.02885	0.342434	0.655108	no	-1.41393	5e-05	0.00948904	0.375288	yes
RIPK2	XLOC_047704	8:90621512-90827677	0.997055	5e-05	0.00217877	1.99592	yes	1.10745	5e-05	0.00116756	2.15464	yes	0.921619	0.0001	0.00706142	1.89424	yes	0.429389	0.0674	0.711165	1.34666	no
STAT1	XLOC_029997	2:191745522-191885686	0.995307	0.0002	0.00707433	1.9935	yes	1.1024	5e-05	0.00116756	2.14712	yes	0.925874	0.0021	0.0730328	1.89983	no	0.0383031	0.8966	0.999777	1.02691	no
SLC22A3	XLOC_042894	6:160769299-160932156	0.993019	5e-05	0.00217877	1.99035	yes	1.20999	5e-05	0.00116756	2.31336	yes	0.380534	0.1301	0.672546	1.30182	no	0.121039	0.63255	0.999777	1.08752	no
VNN1	XLOC_044022	6:133002638-133035188	0.98981	0.0016	0.0361675	1.98592	yes	1.0849	0.0004	0.00703218	2.12123	yes	0.826218	0.0149	0.235806	1.77303	no	0.260634	0.4589	0.999777	1.19801	no
EPSTI1	XLOC_013706	13:43460523-43566555	0.984469	0.001	0.0253363	1.97858	yes	0.806724	0.0087	0.086463	1.74923	no	1.37634	5e-05	0.00369973	2.59609	yes	0.629274	0.0539	0.666724	1.54679	no
NUAK1	XLOC_012611	12:106457117-106533811	0.98252	5e-05	0.00217877	1.97591	yes	1.01523	0.0002	0.00389186	2.02123	yes	1.08982	5e-05	0.00369973	2.12847	yes	0.802642	0.00155	0.107368	1.74429	no
GJB2	XLOC_013508	13:20761608-20767037	0.98066	5e-05	0.00217877	1.97337	yes	0.750164	0.0007	0.0114142	1.68198	yes	0.798573	0.0011	0.0460907	1.73938	yes	-0.183737	0.463	0.999777	0.880419	no
MT1E	XLOC_018838	16:56659386-56661024	0.977031	5e-05	0.00217877	1.96841	yes	0.706038	0.0033	0.0406062	1.63132	yes	1.20993	5e-05	0.00369973	2.31326	yes	0.80034	0.00115	0.0870607	1.74151	no
UGT1A1,UGT1A10,UGT1A3,UGT1A4,UGT1A5,UGT1A6,UGT1A7,UGT1A8,UGT1A9	XLOC_028429	2:234526290-234681956	0.970863	0.0001	0.00393125	1.96001	yes	0.261896	0.3081	0.799252	1.19905	no	0.977127	0.00075	0.0347775	1.96854	yes	0.0599984	0.8378	0.999777	1.04246	no
CORO1A	XLOC_018562	16:30194147-30200397	0.968091	0.00135	0.0317568	1.95625	yes	1.17406	0.0001	0.00213617	2.25646	yes	-0.114749	0.73345	0.994059	0.923543	no	-0.158608	0.6222	0.999777	0.895889	no
LAP3	XLOC_036604	4:17578814-17783135	0.967089	0.0001	0.00393125	1.95489	yes	0.900717	0.00035	0.00629054	1.86699	yes	0.983534	0.00045	0.0238021	1.9773	yes	0.265848	0.32925	0.999777	1.20234	no
EFNB1	XLOC_057213	X:68048839-68061990	0.966548	5e-05	0.00217877	1.95416	yes	1.10145	5e-05	0.00116756	2.1457	yes	0.11453	0.59615	0.977984	1.08262	no	0.0234961	0.9138	0.999777	1.01642	no
PCYOX1L	XLOC_039925	5:148737569-148750532	0.965969	0.00065	0.0182593	1.95338	yes	0.968493	0.0003	0.00552166	1.9568	yes	0.846857	0.0043	0.115033	1.79858	no	0.363554	0.24525	0.999777	1.28659	no
HES1	XLOC_034919	3:193853933-193856521	0.965502	0.00045	0.0134786	1.95274	yes	1.17928	5e-05	0.00116756	2.26464	yes	0.866708	0.00215	0.0740313	1.8235	no	0.433125	0.134	0.908237	1.35015	no
IRAK2	XLOC_033609	3:10206548-10285427	0.963385	0.0001	0.00393125	1.94988	yes	0.890412	0.00025	0.00470905	1.85371	yes	0.952137	0.00035	0.0197921	1.93474	yes	0.728525	0.00685	0.243238	1.65694	no
HERC5	XLOC_037073	4:89378267-89427314	0.956432	5e-05	0.00217877	1.9405	yes	1.27301	5e-05	0.00116756	2.41665	yes	1.32849	5e-05	0.00369973	2.5114	yes	0.29437	0.2062	0.999777	1.22635	no
ETS2	XLOC_031915	21:40177230-40196879	0.95475	0.0001	0.00393125	1.93824	yes	0.222313	0.3561	0.844471	1.1666	no	1.57388	5e-05	0.00369973	2.97704	yes	1.05524	0.00015	0.022588	2.07806	yes
WNT9A	XLOC_004838	1:228106356-228135631	0.945298	0.00035	0.0110556	1.92559	yes	1.48288	5e-05	0.00116756	2.79506	yes	-0.814165	0.01465	0.235602	0.568738	no	-0.686214	0.02955	0.521283	0.621483	no
IDH2	XLOC_018030	15:90626276-90645736	0.944037	0.00015	0.00555	1.9239	yes	1.24838	5e-05	0.00116756	2.37575	yes	0.357552	0.1664	0.727464	1.28125	no	0.210947	0.4066	0.999777	1.15745	no
KLF7	XLOC_030112	2:207938860-208031991	0.939556	0.00125	0.0299896	1.91794	yes	0.483449	0.0877	0.440661	1.39808	no	1.21919	5e-05	0.00369973	2.32816	yes	1.07794	0.0086	0.270783	2.11102	no
JDP2	XLOC_014769	14:75890385-75940814	0.939183	0.0008	0.021236	1.91744	yes	0.680787	0.01635	0.137327	1.60301	no	1.55487	5e-05	0.00369973	2.93807	yes	0.913678	0.003	0.151135	1.88384	no
PSG4	XLOC_026209	19:43696853-43711451	0.935697	0.00035	0.0110556	1.91281	yes	0.791607	0.0024	0.0316448	1.731	yes	0.155269	0.63805	0.983885	1.11363	no	-0.471102	0.11865	0.869723	0.721413	no
CLDN4	XLOC_044923	7:73213871-73247014	0.933945	5e-05	0.00217877	1.91049	yes	1.7653	5e-05	0.00116756	3.39945	yes	0.0381673	0.86585	0.994059	1.02681	no	-1.25034	5e-05	0.00948904	0.420349	yes
RFX5	XLOC_004043	1:151313115-151320503	0.932769	0.00045	0.0134786	1.90894	yes	1.0096	5e-05	0.00116756	2.01335	yes	0.370647	0.1419	0.692621	1.29293	no	0.200963	0.4231	0.999777	1.14947	no
NINJ1	XLOC_051114	9:95883770-95896570	0.92908	0.0001	0.00393125	1.90406	yes	1.41121	5e-05	0.00116756	2.6596	yes	0.384452	0.1291	0.669904	1.30536	no	-0.195409	0.43405	0.999777	0.873325	no
TRIB3	XLOC_030444	20:361260-378203	0.927563	5e-05	0.00217877	1.90206	yes	0.602199	0.00265	0.0341752	1.51803	yes	1.4049	5e-05	0.00369973	2.64799	yes	1.3219	5e-05	0.00948904	2.49995	yes
AQP1,FAM188B,INMT,INMT-FAM188B	XLOC_044569	7:30692199-30965131	0.92743	0.00155	0.0350921	1.90188	yes	2.96731	5e-05	0.00116756	7.82077	yes	-0.0800519	0.80765	0.994059	0.946024	no	0.0458851	0.88855	0.999777	1.03232	no
-	XLOC_027429	2:102599942-102603939	0.926583	0.0018	0.0395754	1.90077	yes	1.11873	0.0001	0.00213617	2.17156	yes	-0.520674	0.12255	0.6567	0.697046	no	-0.411563	0.23215	0.999777	0.751808	no
RNF213	XLOC_021534	17:78234618-78411886	0.923728	0.00055	0.0161397	1.89701	yes	1.10237	0.0001	0.00213617	2.14707	yes	0.330307	0.22855	0.798633	1.25728	no	-0.0952723	0.7175	0.999777	0.936096	no
PTPRU	XLOC_000487	1:29563027-29653325	0.922253	0.00045	0.0134786	1.89507	yes	0.959293	5e-05	0.00116756	1.94436	yes	0.477752	0.0604	0.491598	1.39257	no	0.208245	0.4005	0.999777	1.15528	no
DST	XLOC_043623	6:56322784-56819426	0.917483	0.0005	0.0147924	1.88882	yes	0.460317	0.07595	0.404476	1.37584	no	0.961666	0.0005	0.0257611	1.94756	yes	0.669091	0.0249	0.474504	1.59007	no
IFITM1,IFITM2	XLOC_007236	11:307630-315272	0.917302	5e-05	0.00217877	1.88858	yes	0.941039	5e-05	0.00116756	1.91991	yes	1.20867	5e-05	0.00369973	2.31124	yes	0.507335	0.01825	0.417674	1.42142	no
DHRS2	XLOC_014338	14:24099323-24114848	0.916991	0.00115	0.0282943	1.88817	yes	1.63668	5e-05	0.00116756	3.10949	yes	-0.903902	0.00705	0.155178	0.534439	no	-0.435446	0.1773	0.974991	0.739465	no
SDHA	XLOC_038889	5:218355-256815	0.915904	5e-05	0.00217877	1.88675	yes	1.02299	5e-05	0.00116756	2.03213	yes	0.669092	0.00245	0.0809548	1.59007	no	0.643694	0.00235	0.137371	1.56232	no
MYO7B	XLOC_027646	2:128293377-128395304	0.912413	0.0015	0.0342279	1.88219	yes	1.70503	5e-05	0.00116756	3.26036	yes	-0.505429	0.106	0.615205	0.704451	no	-0.277101	0.38795	0.999777	0.825248	no
KLF4	XLOC_051231	9:110247132-110252763	0.900758	5e-05	0.00217877	1.86705	yes	0.768998	0.00015	0.00305086	1.70409	yes	1.05642	5e-05	0.00369973	2.07976	yes	0.75848	0.00195	0.124494	1.69171	no
PHLDA2	XLOC_008807	11:2949502-2950685	0.895628	0.0001	0.00393125	1.86042	yes	1.45409	5e-05	0.00116756	2.73984	yes	-0.0636685	0.7856	0.994059	0.956828	no	-0.309993	0.1942	0.991832	0.806646	no
TNFRSF21	XLOC_043542	6:47199267-47277675	0.88382	0.0006	0.0171885	1.84525	yes	0.660095	0.00835	0.0836367	1.58019	no	0.728556	0.00555	0.133574	1.65698	no	0.548981	0.03775	0.580578	1.46305	no
TP53I11	XLOC_009176	11:44740941-44972840	0.873932	0.0006	0.0171885	1.83265	yes	1.54317	5e-05	0.00116756	2.91434	yes	0.119976	0.64265	0.984227	1.08672	no	-0.0808866	0.76235	0.999777	0.945476	no
UBE2L6	XLOC_009331	11:57319128-57335757	0.871329	0.0001	0.00393125	1.82935	yes	0.877447	5e-05	0.00116756	1.83712	yes	1.00191	5e-05	0.00369973	2.00265	yes	0.317239	0.1535	0.937218	1.24594	no
STOM	XLOC_051350	9:124101354-124132550	0.864634	0.00125	0.0299896	1.82088	yes	0.369098	0.1387	0.564507	1.29155	no	0.935817	0.00095	0.0412983	1.91297	yes	0.450057	0.0957	0.816943	1.36609	no
IRF1	XLOC_041117	5:131817300-131826515	0.85948	0.0009	0.0233339	1.81438	yes	0.646125	0.00705	0.0736542	1.56496	no	0.838439	0.00185	0.0668451	1.78811	no	0.538612	0.03945	0.591494	1.45257	no
MAP2	XLOC_028217	2:210288749-210598842	0.856292	0.0018	0.0395754	1.81038	yes	0.567151	0.0467	0.293217	1.48159	no	1.0013	0.00065	0.0316159	2.0018	yes	0.357228	0.2177	0.999777	1.28096	no
RARA	XLOC_020959	17:38465437-38513891	0.853885	0.0004	0.0123123	1.80736	yes	1.12786	5e-05	0.00116756	2.18534	yes	0.108183	0.6919	0.994059	1.07787	no	-0.0571269	0.8353	0.999777	0.961176	no
PFKFB4,UCN2	XLOC_035339	3:48555116-48601206	0.85024	0.00045	0.0134786	1.8028	yes	1.27936	5e-05	0.00116756	2.42731	yes	-0.396996	0.14475	0.697959	0.759438	no	-0.565863	0.0417	0.606203	0.675551	no
IL27RA	XLOC_024410	19:14142446-14164056	0.846843	5e-05	0.00217877	1.79856	yes	1.41047	5e-05	0.00116756	2.65824	yes	0.440901	0.05185	0.451085	1.35745	no	0.0441454	0.84705	0.999777	1.03107	no
SEMA4B	XLOC_017078	15:90703835-90772911	0.841342	5e-05	0.00217877	1.79172	yes	0.705626	0.0006	0.0100295	1.63085	yes	0.601327	0.00675	0.149999	1.51711	no	0.243625	0.26255	0.999777	1.18396	no
MED24	XLOC_022282	17:38175349-38256978	0.838964	0.0011	0.0272495	1.78877	yes	0.961328	5e-05	0.00116756	1.9471	yes	0.250806	0.3218	0.867826	1.18987	no	0.346734	0.1696	0.958819	1.27168	no
NUAK2	XLOC_004639	1:205271186-205290883	0.83853	0.0002	0.00707433	1.78823	yes	1.20669	5e-05	0.00116756	2.30807	yes	0.0528837	0.8347	0.994059	1.03734	no	0.434465	0.075	0.743204	1.35141	no
MDK	XLOC_007714	11:46402305-46405443	0.834195	0.0008	0.021236	1.78286	yes	1.32456	5e-05	0.00116756	2.50456	yes	0.360102	0.16945	0.732954	1.28352	no	0.203241	0.43585	0.999777	1.15128	no
CA11	XLOC_026330	19:49141198-49184461	0.831908	0.00225	0.0475888	1.78004	yes	0.884672	0.00145	0.020962	1.84634	yes	0.320273	0.2865	0.842423	1.24857	no	-0.383754	0.2393	0.999777	0.766441	no
TAP1	XLOC_043361	6:32808493-32847625	0.829744	0.00135	0.0317568	1.77737	yes	0.687854	0.00475	0.054914	1.61089	no	0.775359	0.00545	0.133242	1.71162	no	0.182633	0.5031	0.999777	1.13495	no
PPARD	XLOC_042064	6:35310334-35395968	0.821923	0.0001	0.00393125	1.76776	yes	0.917323	5e-05	0.00116756	1.88861	yes	0.209331	0.35865	0.890696	1.15615	no	0.0397208	0.863	0.999777	1.02791	no
JPH2	XLOC_031481	20:42735256-42817594	0.821051	0.0006	0.0171885	1.76669	yes	0.639647	0.00715	0.074293	1.55795	no	0.913798	0.0006	0.0299161	1.884	yes	0.801702	0.00265	0.141749	1.74316	no
DUSP5	XLOC_005980	10:112257595-112271405	0.819846	0.00025	0.00863186	1.76522	yes	0.70086	0.00095	0.014677	1.62547	yes	0.37081	0.1177	0.645398	1.29308	no	0.093172	0.69325	0.999777	1.06671	no
JUNB	XLOC_024383	19:12873816-12985765	0.817953	0.0015	0.0342279	1.7629	yes	0.883642	0.0002	0.00389186	1.84503	yes	0.355702	0.19975	0.773306	1.27961	no	0.121785	0.67665	0.999777	1.08808	no
GADD45A	XLOC_000943	1:68150743-68154021	0.817793	0.00045	0.0134786	1.76271	yes	0.507333	0.0186	0.152377	1.42142	no	1.45664	5e-05	0.00369973	2.74468	yes	1.2834	5e-05	0.00948904	2.43412	yes
KLHDC8B	XLOC_033916	3:49208978-49213921	0.812391	0.0023	0.0484339	1.75612	yes	0.517818	0.0506	0.309819	1.43179	no	0.751857	0.00905	0.179082	1.68396	no	0.309364	0.31565	0.999777	1.23916	no
RXRA	XLOC_050363	9:137208943-137332576	0.809311	0.0011	0.0272495	1.75237	yes	1.17092	5e-05	0.00116756	2.25155	yes	0.444776	0.123	0.658351	1.3611	no	0.212384	0.4647	0.999777	1.1586	no
CXXC5	XLOC_039819	5:139026883-139063467	0.80927	0.00135	0.0317568	1.75232	yes	1.1804	5e-05	0.00116756	2.2664	yes	-0.343356	0.21255	0.78596	0.788206	no	-0.139737	0.6143	0.999777	0.907685	no
IRF2BPL	XLOC_015777	14:77490887-77495034	0.80581	0.0001	0.00393125	1.74813	yes	1.1054	5e-05	0.00116756	2.15159	yes	0.0583335	0.7952	0.994059	1.04126	no	-0.102538	0.6465	0.999777	0.931393	no
ALDH3B1	XLOC_008107	11:67776047-67797928	0.802332	0.00145	0.0334031	1.74392	yes	1.40117	5e-05	0.00116756	2.64116	yes	-0.16638	0.5398	0.965436	0.891076	no	-0.441692	0.1023	0.834176	0.736271	no
VWA5A	XLOC_008628	11:123986068-124018428	0.80057	0.0014	0.0327202	1.74179	yes	0.78429	0.0013	0.0191556	1.72224	yes	0.638182	0.0175	0.256255	1.55637	no	0.150015	0.5893	0.999777	1.10958	no
HRSP12	XLOC_048921	8:99114571-99129469	0.798353	0.00165	0.0370661	1.73911	yes	0.593381	0.01795	0.148323	1.50878	no	0.626998	0.02275	0.296325	1.54435	no	0.311152	0.25125	0.999777	1.2407	no
TINF2	XLOC_015311	14:24708848-24711880	0.797496	0.0003	0.0100233	1.73808	yes	1.07796	5e-05	0.00116756	2.11105	yes	0.48139	0.0567	0.475572	1.39609	no	-0.140851	0.54395	0.999777	0.906984	no
MYO1G	XLOC_046042	7:45002259-45019128	0.797151	0.0008	0.021236	1.73767	yes	0.657419	0.0029	0.036779	1.57726	yes	0.8404	0.0013	0.0524183	1.79055	no	0.180012	0.4725	0.999777	1.13289	no
CLIP2	XLOC_044931	7:73703796-73820273	0.787967	0.0003	0.0100233	1.72664	yes	1.36175	5e-05	0.00116756	2.56997	yes	-0.257011	0.26895	0.831969	0.83682	no	-0.303749	0.1813	0.974991	0.810144	no
CEBPB	XLOC_030904	20:48807375-48809212	0.783513	0.00015	0.00555	1.72132	yes	1.1908	5e-05	0.00116756	2.28279	yes	0.132101	0.5678	0.972555	1.09589	no	-0.0192312	0.9322	0.999777	0.986758	no
IFIH1	XLOC_029798	2:163123588-163175213	0.774414	0.0003	0.0100233	1.7105	yes	0.819643	0.0001	0.00213617	1.76497	yes	1.16134	5e-05	0.00369973	2.23665	yes	0.298303	0.20955	0.999777	1.2297	no
HLA-B,HLA-C	XLOC_043294	6:31236525-31324965	0.772703	0.00035	0.0110556	1.70847	yes	0.838254	0.0001	0.00213617	1.78789	yes	0.471575	0.04025	0.397387	1.38662	no	-0.159132	0.4785	0.999777	0.895564	no
FEZ1	XLOC_010185	11:125315645-125369424	0.770132	0.00045	0.0134786	1.70543	yes	0.530193	0.01515	0.130693	1.44412	no	0.368661	0.1262	0.664532	1.29115	no	0.228225	0.34575	0.999777	1.17139	no
ASNS	XLOC_046442	7:97481429-97501854	0.769977	0.0003	0.0100233	1.70524	yes	0.0188854	0.92675	0.996325	1.01318	no	1.51654	5e-05	0.00369973	2.86104	yes	1.01489	5e-05	0.00948904	2.02075	yes
GRB7	XLOC_020944	17:37894179-37903544	0.76884	0.0024	0.049958	1.7039	yes	1.26457	5e-05	0.00116756	2.40256	yes	0.147002	0.5883	0.977182	1.10727	no	0.00440095	0.9867	0.999777	1.00306	no
ZMIZ1	XLOC_005700	10:80703084-81076276	0.765051	0.00065	0.0182593	1.69943	yes	1.25996	5e-05	0.00116756	2.39489	yes	-0.433904	0.0804	0.55755	0.740256	no	-0.230109	0.34	0.999777	0.85257	no
NFE2L3	XLOC_044517	7:26191837-26226745	0.753856	0.00165	0.0370661	1.68629	yes	0.835092	0.00015	0.00305086	1.78397	yes	1.12578	5e-05	0.00369973	2.18219	yes	0.850698	0.0011	0.0846633	1.80337	no
TNS3	XLOC_046061	7:47314751-47622156	0.753396	0.00125	0.0299896	1.68576	yes	0.740395	0.00035	0.00629054	1.67063	yes	-0.0180192	0.9391	0.994059	0.987588	no	-0.132765	0.55605	0.999777	0.912082	no
LITAF	XLOC_019446	16:11641773-11730237	0.749534	0.00035	0.0110556	1.68125	yes	1.0593	5e-05	0.00116756	2.08392	yes	0.310837	0.1578	0.716812	1.24043	no	0.00162791	0.99405	1	1.00113	no
CARS	XLOC_008811	11:3022151-3078843	0.745288	0.0008	0.021236	1.67631	yes	0.61942	0.00225	0.029951	1.53626	yes	0.89672	0.0001	0.00706142	1.86183	yes	0.623437	0.00595	0.223998	1.54054	no
TFCP2L1	XLOC_029531	2:121974162-122042790	0.744804	0.00165	0.0370661	1.67575	yes	1.29908	5e-05	0.00116756	2.46072	yes	0.633487	0.01505	0.23737	1.55131	no	0.531878	0.0813	0.761455	1.44581	no
SLC6A15	XLOC_012456	12:85253491-85307394	0.74333	0.00045	0.0134786	1.67404	yes	0.821222	0.0001	0.00213617	1.7669	yes	0.628797	0.0073	0.157199	1.54628	no	0.400631	0.0961	0.817292	1.32009	no
HK2	XLOC_027178	2:75061107-75120486	0.739198	0.0003	0.0100233	1.66925	yes	0.813536	5e-05	0.00116756	1.75751	yes	0.723496	0.001	0.0430681	1.65118	yes	0.397437	0.0719	0.728547	1.31717	no
H1FX	XLOC_035842	3:129033614-129045068	0.734859	0.0018	0.0395754	1.66423	yes	0.808818	0.0005	0.0085927	1.75178	yes	0.609353	0.0151	0.237889	1.52557	no	0.470235	0.0621	0.695486	1.38534	no
F3	XLOC_003649	1:94994780-95007387	0.733703	0.0012	0.0292263	1.6629	yes	0.491667	0.02215	0.173646	1.40607	no	1.0383	5e-05	0.00369973	2.05381	yes	0.46593	0.0769	0.745016	1.38121	no
PSAT1	XLOC_049846	9:80912019-80945010	0.731639	0.001	0.0253363	1.66052	yes	-0.131925	0.5585	0.961316	0.912613	no	1.4476	5e-05	0.00369973	2.72754	yes	0.884721	0.00015	0.022588	1.84641	yes
IL4R	XLOC_018511	16:27324988-27376099	0.730873	0.00055	0.0161397	1.65964	yes	0.872163	5e-05	0.00116756	1.83041	yes	0.452139	0.03985	0.39625	1.36807	no	0.290895	0.20065	0.998471	1.2234	no
PLSCR1	XLOC_035979	3:146232966-146262651	0.727174	0.0012	0.0292263	1.65539	yes	0.794938	0.0001	0.00213617	1.735	yes	0.922641	0.0004	0.0218212	1.89558	yes	0.344915	0.1481	0.930914	1.27008	no
SCPEP1	XLOC_021246	17:55055465-55084129	0.727163	0.00145	0.0334031	1.65538	yes	0.883743	0.0001	0.00213617	1.84516	yes	0.378115	0.099	0.601557	1.29964	no	-0.0708493	0.75355	0.999777	0.952077	no
VAV2	XLOC_051514	9:136627015-136857726	0.719919	0.0004	0.0123123	1.64709	yes	0.887449	5e-05	0.00116756	1.8499	yes	0.451832	0.04125	0.401841	1.36778	no	0.423175	0.05725	0.679641	1.34088	no
COL6A1	XLOC_032016	21:47401650-47424964	0.713627	0.0006	0.0171885	1.63992	yes	1.37724	5e-05	0.00116756	2.59771	yes	-0.580913	0.0136	0.225226	0.668541	no	-0.485878	0.0338	0.549775	0.714062	no
MID1IP1	XLOC_056943	X:38660684-38665790	0.710673	0.0013	0.0309837	1.63657	yes	0.547518	0.0114	0.105355	1.46157	no	0.824006	0.00055	0.0279235	1.77031	yes	0.818681	0.00035	0.0400736	1.76379	yes
ARHGDIB	XLOC_011805	12:15094950-15114662	0.670993	0.00155	0.0350921	1.59217	yes	0.755753	0.0002	0.00389186	1.68851	yes	0.686848	0.00315	0.0940336	1.60976	no	0.481295	0.03375	0.549775	1.396	no
SLC2A1	XLOC_003212	1:43391518-43424602	0.667418	0.00175	0.0388301	1.58823	yes	0.247131	0.22825	0.708562	1.18684	no	0.720305	0.00245	0.0809548	1.64753	no	0.0459266	0.8372	0.999777	1.03235	no
DUSP7	XLOC_035407	3:52082934-52090566	0.638825	0.00135	0.0317568	1.55706	yes	0.839778	5e-05	0.00116756	1.78977	yes	0.510582	0.017	0.253469	1.42462	no	0.5432	0.0115	0.327148	1.4572	no
EZR	XLOC_044223	6:159186772-159241625	-0.638815	0.00145	0.0334031	0.64224	yes	-0.576679	0.00445	0.0521154	0.670505	no	-0.190003	0.3941	0.913662	0.876604	no	-0.189912	0.3871	0.999777	0.876659	no
CENPB	XLOC_031124	20:3764497-3767337	-0.647318	0.002	0.0431207	0.638466	yes	-0.619835	0.00225	0.029951	0.650745	yes	-0.538365	0.0169	0.253063	0.688551	no	-0.185022	0.40925	0.999777	0.879636	no
TGFBR2	XLOC_033724	3:30647993-30735640	-0.651811	0.00125	0.0299896	0.636481	yes	-0.632411	0.0013	0.0191556	0.645097	yes	-0.467192	0.0298	0.346612	0.723371	no	-0.12669	0.5575	0.999777	0.91593	no
ATP6V1B2	XLOC_047182	8:20054877-20084330	-0.651931	0.00145	0.0334031	0.636428	yes	-0.751071	0.0001	0.00213617	0.594162	yes	-0.578903	0.01065	0.195451	0.669473	no	-0.556953	0.0122	0.336691	0.679736	no
TUBB4B	XLOC_050437	9:140135664-140142222	-0.653379	0.0015	0.0342279	0.635789	yes	-0.523665	0.0096	0.0929316	0.695602	no	-0.641066	0.00435	0.115703	0.641239	no	-0.266173	0.22795	0.999777	0.831522	no
BCAR3	XLOC_003633	1:94027346-94312706	-0.661846	0.0015	0.0342279	0.632069	yes	-0.668005	0.00115	0.0173807	0.629376	yes	-0.261975	0.2365	0.803407	0.833945	no	0.0376819	0.86445	0.999777	1.02646	no
CNN3	XLOC_003657	1:95362506-95392834	-0.674435	0.0018	0.0395754	0.626578	yes	-0.730023	0.00025	0.00470905	0.602894	yes	-0.338054	0.12765	0.66707	0.791108	no	-0.281187	0.20235	0.999777	0.822914	no
HSPA1B	XLOC_041991	6:31795511-31798031	-0.675995	0.00085	0.0221967	0.6259	yes	-0.775132	0.0001	0.00213617	0.584335	yes	-0.989551	5e-05	0.00369973	0.503634	yes	-1.04239	0.0001	0.0162988	0.485522	yes
LASP1	XLOC_020928	17:37026111-37078023	-0.678706	0.0012	0.0292263	0.624725	yes	-0.591738	0.00395	0.0472363	0.663543	yes	-0.709276	0.0015	0.0582863	0.611627	no	-0.343333	0.1346	0.909443	0.788218	no
SLC23A2	XLOC_031136	20:4833001-4990939	-0.688586	0.0018	0.0395754	0.620462	yes	-0.470887	0.03045	0.218859	0.721521	no	-0.599995	0.0111	0.198729	0.659756	no	-0.283425	0.2184	0.999777	0.821638	no
S100A10	XLOC_004058	1:151955390-151966866	-0.694527	0.00145	0.0334031	0.617912	yes	-0.822785	0.0001	0.00213617	0.56535	yes	-0.496618	0.03885	0.390493	0.708766	no	-0.574392	0.01615	0.389644	0.671569	no
PARP4	XLOC_013557	13:24982294-25171814	-0.696606	0.00065	0.0182593	0.617022	yes	-0.842736	5e-05	0.00116756	0.557585	yes	-0.366216	0.08915	0.581745	0.775815	no	-0.357599	0.0974	0.820791	0.780462	no
LAD1,TNNT2	XLOC_004576	1:201328135-201368736	-0.702969	0.00035	0.0110556	0.614307	yes	-0.544439	0.00495	0.0567118	0.685658	no	-0.668252	0.0021	0.0730328	0.629269	no	-0.22023	0.2861	0.999777	0.858429	no
EHF	XLOC_007628	11:34642577-34684924	-0.703522	0.00075	0.0205497	0.614071	yes	-0.962934	5e-05	0.00116756	0.513013	yes	0.161433	0.4489	0.941168	1.1184	no	0.0378205	0.8566	0.999777	1.02656	no
PLEKHA5	XLOC_010505	12:19282591-19529334	-0.70809	0.0011	0.0272495	0.61213	yes	-0.945188	5e-05	0.00116756	0.519362	yes	-0.309316	0.1714	0.735909	0.807024	no	-0.190012	0.38925	0.999777	0.876598	no
EBP	XLOC_057036	X:48379545-48387104	-0.709255	0.001	0.0253363	0.611636	yes	-0.790477	5e-05	0.00116756	0.578153	yes	-0.58642	0.0109	0.198209	0.665993	no	-0.319107	0.15645	0.941292	0.801566	no
DHCR7	XLOC_009640	11:71139238-71163914	-0.713491	0.00065	0.0182593	0.609843	yes	-0.869454	5e-05	0.00116756	0.547354	yes	-0.368632	0.1036	0.610152	0.774517	no	-0.330847	0.1485	0.930914	0.79507	no
MGST3	XLOC_001801	1:165600097-165631033	-0.71436	0.0011	0.0272495	0.609475	yes	-0.654577	0.00205	0.0278957	0.635262	yes	-0.816561	0.0005	0.0257611	0.567794	yes	-0.644772	0.0054	0.210737	0.639594	no
TUBB2A	XLOC_042985	6:3153902-3157760	-0.719419	0.0019	0.0415216	0.607342	yes	-0.337326	0.121	0.523979	0.791507	no	-0.880683	0.00045	0.0238021	0.54311	yes	-0.770787	0.0017	0.116019	0.586098	no
PTGES	XLOC_051465	9:132500609-132515326	-0.731718	0.00075	0.0205497	0.602186	yes	-0.581125	0.0061	0.0662638	0.668442	no	-1.01061	5e-05	0.00369973	0.496336	yes	-0.851755	0.0002	0.027708	0.55411	yes
RCBTB1	XLOC_013766	13:50106079-50159796	-0.734831	0.00115	0.0282943	0.600888	yes	-0.94192	5e-05	0.00116756	0.52054	yes	-0.429741	0.061	0.493355	0.742395	no	-0.119964	0.58985	0.999777	0.920211	no
MAPKAP1	XLOC_051400	9:128199671-128469513	-0.751375	0.00215	0.0458086	0.594037	yes	-0.756948	0.00155	0.0221978	0.591747	yes	-0.705902	0.00535	0.132192	0.613059	no	-0.454845	0.07005	0.720984	0.729589	no
ITGB4	XLOC_021458	17:73717407-73761792	-0.753503	0.00235	0.0492004	0.593162	yes	-0.805647	0.00115	0.0173807	0.572105	yes	-0.487386	0.06175	0.497397	0.713316	no	0.0407532	0.8752	0.999777	1.02865	no
FAM20C	XLOC_044317	7:182934-300711	-0.754798	0.00065	0.0182593	0.592629	yes	-0.616885	0.0047	0.0545421	0.652077	no	-1.09357	5e-05	0.00369973	0.4686	yes	-0.600959	0.01215	0.336691	0.659316	no
TXNRD1	XLOC_011264	12:104609556-104744143	-0.770297	0.00165	0.0370661	0.586297	yes	-1.26808	5e-05	0.00116756	0.415212	yes	-0.339164	0.15115	0.710829	0.790499	no	-0.240998	0.33785	0.999777	0.84616	no
OPN3	XLOC_004990	1:241695433-241965435	-0.777502	0.0024	0.049958	0.583376	yes	-0.837718	0.00095	0.014677	0.559528	yes	-0.496925	0.0602	0.490881	0.708616	no	-0.402822	0.12125	0.876529	0.756377	no
CORO1B,PTPRCAP	XLOC_009565	11:67202980-67211292	-0.778606	0.0006	0.0171885	0.58293	yes	-0.661894	0.005	0.0570709	0.632048	no	-0.522271	0.04145	0.403507	0.696275	no	-0.571605	0.0244	0.470804	0.672868	no
LPAR5	XLOC_011651	12:6728000-6745613	-0.7854	0.00155	0.0350921	0.580191	yes	-0.442291	0.07235	0.391846	0.735965	no	-0.854999	0.00085	0.0383907	0.552866	yes	-0.746669	0.00435	0.188918	0.595978	no
ZFHX4	XLOC_047629	8:77318888-77779521	-0.792059	0.001	0.0253363	0.577519	yes	-0.723105	0.00135	0.0196837	0.605792	yes	-0.812285	0.00165	0.0622037	0.569479	no	-0.13745	0.5892	0.999777	0.909125	no
TP53BP2	XLOC_004789	1:223967498-224033674	-0.796734	0.00085	0.0221967	0.575651	yes	-0.818217	0.00055	0.00932622	0.567142	yes	-0.749494	0.00205	0.0718326	0.594812	no	-0.41856	0.0877	0.787935	0.748171	no
SF3B4	XLOC_004011	1:149895208-149900461	-0.796777	0.0001	0.00393125	0.575634	yes	-0.661112	0.00125	0.0186161	0.632391	yes	-0.774885	0.0005	0.0257611	0.584435	yes	-0.253326	0.243	0.999777	0.83896	no
DNAJB12	XLOC_006717	10:74092587-74114988	-0.804317	0.00105	0.026464	0.572633	yes	-0.539547	0.0199	0.159607	0.687987	no	-0.585548	0.0239	0.306144	0.666396	no	-0.314265	0.2072	0.999777	0.804261	no
MB21D2	XLOC_036319	3:192514603-192635950	-0.810935	0.00195	0.0421054	0.570012	yes	-0.986842	0.0002	0.00389186	0.504581	yes	-0.409158	0.12335	0.659463	0.753063	no	-0.230597	0.3747	0.999777	0.852282	no
NCOA5	XLOC_031530	20:44689623-44718594	-0.814574	0.00035	0.0110556	0.568576	yes	-0.597147	0.0159	0.134657	0.66106	no	-0.618969	0.0408	0.400394	0.651136	no	-0.195547	0.4291	0.999777	0.873242	no
TSPAN13	XLOC_044446	7:16793159-16824173	-0.816549	0.0012	0.0292263	0.567799	yes	-0.905136	0.00015	0.00305086	0.533982	yes	-0.450596	0.0736	0.538868	0.73174	no	-0.350113	0.15505	0.93966	0.784523	no
PHLDA1	XLOC_012411	12:76419226-76427712	-0.825283	0.00035	0.0110556	0.564371	yes	-1.20805	5e-05	0.00116756	0.432853	yes	0.364618	0.1609	0.718935	1.28754	no	1.09525	5e-05	0.00948904	2.1365	yes
MAVS	XLOC_030491	20:3827449-3856882	-0.834444	0.00215	0.0458086	0.560799	yes	-0.803246	0.0026	0.0335586	0.573058	yes	-0.886614	0.0012	0.0492425	0.540882	yes	-0.523409	0.0499	0.651569	0.695726	no
EFNB2	XLOC_014023	13:107142092-107188005	-0.836179	0.0001	0.00393125	0.560125	yes	-0.555604	0.01	0.095534	0.680372	no	-0.785166	0.00105	0.0445322	0.580285	yes	0.0609221	0.7916	0.999777	1.04313	no
PHLDA3	XLOC_004579	1:201434619-201438365	-0.839073	0.0002	0.00707433	0.559003	yes	-0.820371	5e-05	0.00116756	0.566296	yes	-0.368316	0.10265	0.608421	0.774686	no	-0.21885	0.3219	0.999777	0.85925	no
NCOA6	XLOC_031389	20:33284721-33413452	-0.842418	0.00195	0.0421054	0.557708	yes	-0.804984	0.00205	0.0278957	0.572368	yes	-0.816648	0.0028	0.0875299	0.56776	no	-0.268158	0.30895	0.999777	0.830379	no
BRPF3	XLOC_042083	6:36114474-36200567	-0.848021	0.0003	0.0100233	0.555546	yes	-0.527568	0.0242	0.184885	0.693723	no	-0.91131	0.00055	0.0279235	0.531702	yes	-0.308999	0.2419	0.999777	0.807202	no
RAB22A	XLOC_030979	20:56884751-56942563	-0.849687	5e-05	0.00217877	0.554905	yes	-0.929154	5e-05	0.00116756	0.525166	yes	-0.715489	0.0019	0.0682969	0.608999	no	-0.550412	0.0238	0.466692	0.682825	no
AREG	XLOC_036971	4:75310850-75320726	-0.850351	0.00145	0.0334031	0.55465	yes	-1.34093	5e-05	0.00116756	0.394766	yes	-0.0951233	0.7242	0.994059	0.936192	no	0.383109	0.15225	0.936712	1.30415	no
NOL12,TRIOBP	XLOC_032850	22:38077679-38172563	-0.862495	0.0001	0.00393125	0.550001	yes	-0.748879	0.002	0.0273859	0.595066	yes	-0.766591	0.0029	0.0896487	0.587805	no	-0.328098	0.19485	0.991971	0.796586	no
NEDD4L	XLOC_023359	18:55711598-56068772	-0.865493	0.00235	0.0492004	0.548859	yes	-0.75265	0.0067	0.0711149	0.593512	no	-0.681278	0.0071	0.155296	0.623613	no	-0.522521	0.06775	0.711606	0.696154	no
FAM210B	XLOC_030945	20:54933970-54943719	-0.868535	5e-05	0.00217877	0.547703	yes	-0.961213	5e-05	0.00116756	0.513625	yes	-0.920657	0.00025	0.0151867	0.528268	yes	-0.652014	0.0054	0.210737	0.636391	no
MYBL2	XLOC_030817	20:42295753-42345136	-0.869817	0.00025	0.00863186	0.547216	yes	-0.833988	0.0001	0.00213617	0.560976	yes	-0.296869	0.1937	0.763764	0.814017	no	0.480367	0.0297	0.5215	1.3951	no
CRIM1	XLOC_026883	2:36582885-36873230	-0.878701	0.00025	0.00863186	0.543857	yes	-0.857391	0.0016	0.0227224	0.55195	yes	-0.361267	0.16535	0.725381	0.778481	no	-0.164409	0.5111	0.999777	0.892294	no
ITPKB	XLOC_004826	1:226799328-226927072	-0.8889	0.0006	0.0171885	0.540026	yes	-0.6962	0.00465	0.054085	0.617196	no	-1.13912	0.00015	0.00993643	0.454036	yes	-0.495576	0.05185	0.659111	0.709278	no
EREG	XLOC_036970	4:75230859-75254468	-0.893759	5e-05	0.00217877	0.53821	yes	-1.45912	5e-05	0.00116756	0.363715	yes	-0.3633	0.1162	0.641961	0.777384	no	0.14168	0.51535	0.999777	1.10319	no
SUCO	XLOC_001888	1:172501488-172580971	-0.893825	0.0001	0.00393125	0.538185	yes	-0.843639	5e-05	0.00116756	0.557236	yes	-0.579227	0.01175	0.205087	0.669322	no	-0.300437	0.18925	0.982686	0.812006	no
FNBP1	XLOC_051469	9:132649465-132805474	-0.899547	0.00075	0.0205497	0.536055	yes	-0.751822	0.0062	0.0669696	0.593853	no	-0.748149	0.00865	0.173137	0.595367	no	-0.589433	0.041	0.60171	0.664604	no
B3GALTL	XLOC_013043	13:31774072-31906413	-0.905728	0.0015	0.0342279	0.533763	yes	-0.714201	0.00915	0.0895962	0.609543	no	-0.651207	0.0262	0.326292	0.636747	no	-0.188646	0.5082	0.999777	0.877429	no
HSPA1A	XLOC_041990	6:31777395-31785723	-0.913872	5e-05	0.00217877	0.530759	yes	-0.853621	0.0001	0.00213617	0.553394	yes	-1.25365	5e-05	0.00369973	0.419386	yes	-1.11761	5e-05	0.00948904	0.460857	yes
EXTL3	XLOC_047270	8:28457985-28613116	-0.925825	0.0001	0.00393125	0.526379	yes	-0.916435	5e-05	0.00116756	0.529817	yes	-0.706462	0.00245	0.0809548	0.612821	no	-0.475636	0.03925	0.589772	0.71915	no
IER3	XLOC_043278	6:30710975-30712331	-0.927288	5e-05	0.00217877	0.525846	yes	-1.67797	5e-05	0.00116756	0.312522	yes	-0.106202	0.63665	0.983612	0.929031	no	-0.0774057	0.73015	0.999777	0.94776	no
SH3BP5	XLOC_035094	3:15295690-15382875	-0.930592	0.00045	0.0134786	0.524643	yes	-0.802187	0.00085	0.0134723	0.573479	yes	-0.761777	0.00315	0.0940336	0.589769	no	-0.441354	0.0791	0.754853	0.736443	no
KCNK1	XLOC_002434	1:233749749-233808258	-0.936416	0.0007	0.0194002	0.522529	yes	-1.12678	5e-05	0.00116756	0.457937	yes	-0.667863	0.0166	0.251276	0.629438	no	-0.435079	0.126	0.888601	0.739653	no
DAP	XLOC_040315	5:10679341-10761384	-0.93794	5e-05	0.00217877	0.521978	yes	-1.07288	5e-05	0.00116756	0.475369	yes	-0.834142	0.0004	0.0218212	0.560917	yes	-0.483086	0.03455	0.556576	0.715446	no
DOCK5	XLOC_047235	8:25042237-25275598	-0.951239	0.00065	0.0182593	0.517188	yes	-0.883596	5e-05	0.00116756	0.542015	yes	-0.650232	0.0112	0.199748	0.637178	no	-0.321055	0.1766	0.973584	0.800484	no
HMGA2	XLOC_010988	12:66151799-66360075	-0.951941	0.00115	0.0282943	0.516937	yes	-0.697326	0.01445	0.126221	0.616714	no	-0.662508	0.0469	0.429228	0.631779	no	-0.087242	0.75605	0.999777	0.941321	no
NDRG3	XLOC_031422	20:35280168-35374533	-0.972475	0.0001	0.00393125	0.509631	yes	-0.765978	0.0002	0.00389186	0.588055	yes	-1.0921	5e-05	0.00369973	0.469078	yes	-0.660477	0.0063	0.230291	0.632669	no
ABL2	XLOC_004440	1:179068316-179198819	-0.97388	0.00085	0.0221967	0.509135	yes	-0.945983	0.00235	0.0310391	0.519076	yes	-0.333779	0.2747	0.835724	0.793455	no	-0.320197	0.2425	0.999777	0.80096	no
CPVL	XLOC_045899	7:29034846-29553944	-0.9774	0.00055	0.0161397	0.507894	yes	-1.00549	0.0001	0.00213617	0.498101	yes	-0.539019	0.05535	0.467785	0.688239	no	-0.414875	0.1393	0.914088	0.750084	no
GYS1	XLOC_026342	19:49471381-49496567	-0.984934	5e-05	0.00217877	0.505249	yes	-0.840817	0.0002	0.00389186	0.558327	yes	-0.814835	0.00195	0.069555	0.568473	no	-0.459362	0.0824	0.768166	0.727308	no
PLEKHM1	XLOC_022455	17:43513265-43568141	-0.985655	0.0003	0.0100233	0.504996	yes	-0.807482	0.0007	0.0114142	0.571378	yes	-0.669461	0.0388	0.390493	0.628742	no	-0.86025	0.00185	0.122631	0.550857	no
LMTK2	XLOC_045093	7:97736196-97838945	-0.987153	0.0001	0.00393125	0.504472	yes	-0.887199	5e-05	0.00116756	0.540663	yes	-0.802224	0.0007	0.0333483	0.573464	yes	-0.597359	0.0126	0.343623	0.660963	no
SORBS3	XLOC_047209	8:22298331-22433301	-0.98894	0.0015	0.0342279	0.503848	yes	-0.794122	0.0084	0.0840825	0.576694	no	-0.829238	0.0206	0.280124	0.562826	no	-0.509108	0.1833	0.976162	0.702657	no
CAPN2	XLOC_002331	1:223889294-223963720	-0.99128	5e-05	0.00217877	0.503031	yes	-0.896237	5e-05	0.00116756	0.537286	yes	-0.844846	0.0001	0.00706142	0.55677	yes	-0.424072	0.06165	0.695486	0.745318	no
NR2F2	XLOC_017141	15:96670597-96883492	-0.994255	0.0014	0.0327202	0.501995	yes	-1.01514	0.00035	0.00629054	0.49478	yes	-0.433386	0.1666	0.72782	0.740522	no	-0.119975	0.67485	0.999777	0.920204	no
CAMK2N1	XLOC_002895	1:20808883-20812755	-0.998011	5e-05	0.00217877	0.50069	yes	-0.807552	5e-05	0.00116756	0.571351	yes	-0.669005	0.0025	0.0810664	0.62894	no	-0.387647	0.07195	0.728547	0.764375	no
TSC22D2	XLOC_034609	3:150126092-150177993	-0.999708	0.00035	0.0110556	0.500101	yes	-0.78207	0.00695	0.0729083	0.581532	no	-0.520722	0.0739	0.540496	0.697023	no	-0.569317	0.04715	0.637906	0.673936	no
SAMD9	XLOC_046408	7:92728828-92747336	-1.00865	5e-05	0.00217877	0.497011	yes	-0.602331	0.00285	0.0363256	0.658689	yes	-1.07176	5e-05	0.00369973	0.475738	yes	-1.28326	5e-05	0.00948904	0.410866	yes
DANCR	XLOC_036798	4:53578596-53586998	-1.01279	0.00035	0.0110556	0.495587	yes	-1.04096	0.00015	0.00305086	0.486004	yes	-0.775741	0.0119	0.206153	0.584089	no	-0.137275	0.62535	0.999777	0.909235	no
PTHLH	XLOC_011885	12:28111016-28128368	-1.01522	0.00085	0.0221967	0.494753	yes	-0.681717	0.0149	0.129046	0.623423	no	-1.00751	0.00185	0.0668451	0.497404	no	-0.0533031	0.8499	0.999777	0.963727	no
KIAA1549	XLOC_046790	7:138391039-138666064	-1.01775	0.00035	0.0110556	0.493886	yes	-1.10608	5e-05	0.00116756	0.464555	yes	-0.787471	0.01805	0.259394	0.579359	no	-0.426063	0.13535	0.91104	0.74429	no
ADAM9	XLOC_047361	8:38854387-38962663	-1.03363	5e-05	0.00217877	0.48848	yes	-1.19509	5e-05	0.00116756	0.436759	yes	-0.6905	0.0015	0.0582863	0.619639	no	-0.632603	0.00365	0.17026	0.645012	no
RUNX1	XLOC_032246	21:36160097-37357047	-1.06064	0.00025	0.00863186	0.479419	yes	-0.381666	0.20175	0.67819	0.767551	no	-0.159447	0.61175	0.978697	0.895368	no	0.188275	0.5977	0.999777	1.1394	no
SLAMF7	XLOC_001732	1:160709036-160724611	-1.06585	0.0003	0.0100233	0.477691	yes	-0.150974	0.5981	0.973647	0.900642	no	-1.7903	5e-05	0.00369973	0.289112	yes	-1.35456	0.00195	0.124494	0.391054	no
FDPS	XLOC_001635	1:155278538-155300905	-1.07323	0.0003	0.0100233	0.475254	yes	-1.04353	0.00015	0.00305086	0.485139	yes	-0.877101	0.00315	0.0940336	0.54446	no	-0.696667	0.0173	0.407884	0.616996	no
ALG14	XLOC_003658	1:95448296-95538501	-1.07657	0.0008	0.021236	0.474155	yes	-0.683812	0.0162	0.136442	0.622518	no	-0.690247	0.0238	0.305708	0.619748	no	-0.510451	0.08935	0.79027	0.702003	no
ZMAT3	XLOC_036208	3:178735010-178790067	-1.07741	0.0005	0.0147924	0.473879	yes	-0.776921	0.0053	0.0596055	0.583611	no	-1.47751	5e-05	0.00369973	0.359108	yes	-1.06835	0.0069	0.243238	0.476864	no
CUEDC1	XLOC_022618	17:55938603-56032687	-1.07875	0.00045	0.0134786	0.473439	yes	-0.981475	0.00275	0.0352567	0.506462	yes	-0.670282	0.051	0.449026	0.628384	no	-0.496852	0.13625	0.912663	0.708651	no
DSC2	XLOC_023767	18:28645856-28742819	-1.08605	5e-05	0.00217877	0.471049	yes	-1.242	5e-05	0.00116756	0.422786	yes	-0.551595	0.01695	0.253267	0.682265	no	-0.452898	0.0464	0.634748	0.730574	no
RBL1	XLOC_031427	20:35624751-35725581	-1.09427	0.0003	0.0100233	0.468373	yes	-0.769323	0.0228	0.17765	0.586693	no	-0.454476	0.144	0.696759	0.729775	no	0.434008	0.23935	0.999777	1.35098	no
ST3GAL5	XLOC_029205	2:86066199-86116137	-1.09484	0.00185	0.040613	0.468188	yes	-0.618524	0.0585	0.341902	0.651337	no	-0.806676	0.0494	0.439669	0.571698	no	-0.970613	0.0161	0.389644	0.510289	no
GSR	XLOC_048421	8:30535582-30585443	-1.11004	5e-05	0.00217877	0.463281	yes	-1.25065	5e-05	0.00116756	0.420259	yes	-0.488945	0.042	0.404894	0.712546	no	-0.313292	0.20835	0.999777	0.804803	no
MSRA	XLOC_047084	8:9911777-10286401	-1.12363	0.00195	0.0421054	0.458938	yes	-0.924385	0.00825	0.0827434	0.526905	no	-1.03963	0.01095	0.198599	0.486452	no	-0.301324	0.4069	0.999777	0.811507	no
GBP3	XLOC_003584	1:89472348-89488577	-1.13113	0.00015	0.00555	0.456558	yes	-1.1181	5e-05	0.00116756	0.4607	yes	-0.625369	0.0326	0.3599	0.648254	no	-0.923689	0.0019	0.123003	0.527159	no
HYAL1	XLOC_035385	3:50337319-50350317	-1.13153	0.00035	0.0110556	0.456431	yes	-0.828999	0.00475	0.054914	0.56292	no	-1.03559	0.00165	0.0622037	0.487816	no	-0.619856	0.06405	0.700901	0.650736	no
C1orf85	XLOC_004170	1:156252725-156265463	-1.14031	0.0007	0.0194002	0.453662	yes	-0.811999	0.01095	0.102434	0.569592	no	-1.16519	0.00135	0.0539651	0.445906	no	-0.750796	0.04875	0.643221	0.594276	no
RP5-857K21.10,RP5-857K21.11,RP5-857K21.14,RP5-857K21.7	XLOC_000016	1:536815-659930	-1.14152	5e-05	0.00217877	0.453282	yes	-0.786283	0.0017	0.0237891	0.579836	yes	-1.16733	0.00015	0.00993643	0.445245	yes	-0.816099	0.00355	0.166718	0.567976	no
ZBED2	XLOC_035688	3:111011565-111384597	-1.14318	5e-05	0.00217877	0.45276	yes	-1.24057	5e-05	0.00116756	0.423205	yes	-0.940774	5e-05	0.00369973	0.520953	yes	-0.649092	0.0043	0.187925	0.637682	no
SOAT1	XLOC_001943	1:179262874-179327815	-1.16051	5e-05	0.00217877	0.447354	yes	-1.1298	0.0001	0.00213617	0.456979	yes	-0.80619	0.0085	0.172116	0.57189	no	-0.261726	0.3823	0.999777	0.834089	no
FAM171A1	XLOC_006296	10:15253641-15413097	-1.16334	0.00175	0.0388301	0.446478	yes	-1.2446	0.0002	0.00389186	0.422025	yes	-0.841953	0.01315	0.220663	0.557888	no	-0.335084	0.3058	0.999777	0.792738	no
FOXD1	XLOC_040723	5:72740653-72744592	-1.17707	0.0001	0.00393125	0.442249	yes	-0.819847	0.01235	0.111837	0.566502	no	-0.785969	0.027	0.331243	0.579962	no	-0.399787	0.20425	0.999777	0.75797	no
HIPK2	XLOC_046799	7:139246315-139720125	-1.19003	5e-05	0.00217877	0.438294	yes	-1.32317	5e-05	0.00116756	0.399656	yes	-1.11417	0.0006	0.0299161	0.461957	yes	-0.530641	0.0597	0.686377	0.692247	no
FAIM3	XLOC_004663	1:207077505-207096592	-1.19276	0.00065	0.0182593	0.437465	yes	-1.29578	0.0002	0.00389186	0.407316	yes	-1.17546	0.003	0.0919229	0.442743	no	-0.563935	0.0987	0.822738	0.676455	no
CYP1A1	XLOC_017827	15:75011882-75018002	-1.20694	0.00025	0.00863186	0.433186	yes	0.737498	0.0091	0.0892781	1.66728	no	-1.63988	5e-05	0.00369973	0.320883	yes	-1.062	0.00285	0.14788	0.478968	no
DNMBP	XLOC_006966	10:101635333-101769676	-1.23321	5e-05	0.00217877	0.42537	yes	-1.32466	5e-05	0.00116756	0.399243	yes	-0.912799	0.00085	0.0383907	0.531154	yes	-0.304368	0.22145	0.999777	0.809797	no
SWT1	XLOC_002001	1:185126211-185260900	-1.23457	0.00015	0.00555	0.424969	yes	-0.785869	0.0114	0.105355	0.580002	no	-0.896571	0.01195	0.206505	0.537162	no	-0.719084	0.03045	0.527318	0.607483	no
PLAT	XLOC_048517	8:42032235-42065242	-1.24131	5e-05	0.00217877	0.422988	yes	-0.865145	0.00095	0.014677	0.548991	yes	-0.762441	0.00325	0.0961931	0.589498	no	0.132684	0.58385	0.999777	1.09633	no
RP11-54H7.2	XLOC_013415	13:109917749-109959984	-1.24436	5e-05	0.00217877	0.422095	yes	-1.13352	5e-05	0.00116756	0.455802	yes	-1.0858	5e-05	0.00369973	0.471131	yes	-0.45786	0.0307	0.529002	0.728065	no
ASPM	XLOC_004543	1:197053257-197115824	-1.24454	5e-05	0.00217877	0.422042	yes	-1.12579	5e-05	0.00116756	0.458251	yes	-0.554938	0.03635	0.379296	0.680686	no	0.376537	0.14745	0.930914	1.29822	no
RPH3AL	XLOC_021615	17:62292-236045	-1.25891	0.00125	0.0299896	0.41786	yes	0.101149	0.7885	0.995508	1.07263	no	-0.45624	0.22315	0.794736	0.728883	no	-0.574872	0.1382	0.913029	0.671346	no
TNFRSF10D	XLOC_048346	8:22993100-23021543	-1.26437	5e-05	0.00217877	0.416281	yes	-0.785987	0.0006	0.0100295	0.579955	yes	-1.5407	5e-05	0.00369973	0.343719	yes	-1.20424	5e-05	0.00948904	0.433998	yes
SLC25A13	XLOC_046429	7:95749531-95951459	-1.27845	5e-05	0.00217877	0.412238	yes	-1.10852	5e-05	0.00116756	0.46377	yes	-0.997629	5e-05	0.00369973	0.500822	yes	-0.451178	0.0565	0.679641	0.731445	no
GPRC5A	XLOC_010453	12:13037747-13070871	-1.27933	0.0002	0.00707433	0.411987	yes	-1.09988	0.00085	0.0134723	0.466555	yes	-0.844824	0.01355	0.224665	0.556779	no	-0.917267	0.00895	0.278637	0.529511	no
MOCS3	XLOC_030920	20:49575362-49577820	-1.28138	5e-05	0.00217877	0.411402	yes	-0.965071	0.00045	0.00778592	0.512253	yes	-1.08824	0.00075	0.0347775	0.470335	yes	-0.374364	0.18355	0.976162	0.771445	no
MALT1	XLOC_023368	18:56337711-56421709	-1.28577	5e-05	0.00217877	0.410152	yes	-1.48935	5e-05	0.00116756	0.356173	yes	-1.01562	5e-05	0.00369973	0.494616	yes	-0.775502	0.0011	0.0846633	0.584185	no
SFRP1	XLOC_048502	8:41119480-41167016	-1.29152	5e-05	0.00217877	0.40852	yes	-1.13992	5e-05	0.00116756	0.453785	yes	-1.12834	5e-05	0.00369973	0.457442	yes	-0.372925	0.11125	0.859118	0.772215	no
FGFRL1	XLOC_036429	4:1003723-1020685	-1.29642	0.0001	0.00393125	0.407135	yes	-0.171816	0.5067	0.942339	0.887725	no	-1.57518	0.0002	0.0127624	0.335601	yes	-1.27651	0.0001	0.0162988	0.412793	yes
PIGM	XLOC_004249	1:159997461-160001783	-1.30269	0.0003	0.0100233	0.40537	yes	-0.914196	0.00535	0.0601236	0.53064	no	-1.57899	5e-05	0.00369973	0.334716	yes	-0.535276	0.11975	0.874087	0.690027	no
C6orf141	XLOC_042225	6:49518112-49529623	-1.30852	0.00195	0.0421054	0.403735	yes	-1.74945	5e-05	0.00116756	0.297415	yes	-0.55319	0.10605	0.615205	0.681512	no	-0.370472	0.27895	0.999777	0.773529	no
DKK1	XLOC_005506	10:54073991-54077802	-1.32016	5e-05	0.00217877	0.400491	yes	-0.792709	0.00625	0.0674145	0.577259	no	-0.805048	0.01	0.188496	0.572343	no	0.020184	0.94325	0.999777	1.01409	no
PRR15	XLOC_044552	7:29603426-29606911	-1.329	0.00235	0.0492004	0.398044	yes	-1.43356	0.00015	0.00305086	0.370216	yes	-0.781796	0.034	0.366647	0.581642	no	-0.822951	0.05835	0.682754	0.565284	no
IL24	XLOC_002201	1:207070776-207077484	-1.35238	5e-05	0.00217877	0.391645	yes	-0.725348	0.00455	0.0531239	0.604851	no	-1.13956	5e-05	0.00369973	0.453898	yes	-0.908669	0.00195	0.124494	0.532676	no
SPOCD1	XLOC_003069	1:32254730-32281652	-1.35266	5e-05	0.00217877	0.391569	yes	-0.682278	0.0201	0.160958	0.623181	no	-1.05309	0.00335	0.0976978	0.481935	no	-0.996829	0.0022	0.134268	0.5011	no
-	XLOC_056980	X:44654076-44654166	-1.36204	0.0012	0.0292263	0.389032	yes	0.229543	0.52015	0.946016	1.17246	no	-0.371077	0.3349	0.874651	0.773205	no	-0.471811	0.22775	0.999777	0.721059	no
SPTLC3	XLOC_030547	20:12989626-13149492	-1.37613	0.00015	0.00555	0.385251	yes	-1.58357	5e-05	0.00116756	0.333655	yes	-0.948315	0.02585	0.323672	0.518237	no	-1.03791	0.011	0.317607	0.487033	no
ZNF608	XLOC_041067	5:123972607-124084512	-1.3873	0.0006	0.0171885	0.38228	yes	-1.25379	0.0213	0.168538	0.419345	no	-0.854578	0.0318	0.355578	0.553027	no	-0.277049	0.4847	0.999777	0.825277	no
DCBLD2	XLOC_035622	3:98433173-98620633	-1.38831	5e-05	0.00217877	0.382012	yes	-1.16289	5e-05	0.00116756	0.446617	yes	-1.23864	5e-05	0.00369973	0.423772	yes	-0.352304	0.16585	0.952606	0.783332	no
DLC1	XLOC_048285	8:12940869-13373167	-1.38932	5e-05	0.00217877	0.381745	yes	-1.06868	0.00055	0.00932622	0.476755	yes	-0.296686	0.3532	0.88698	0.81412	no	0.560778	0.0704	0.722416	1.47506	no
ORAI2	XLOC_045169	7:102067264-102105323	-1.4014	0.00155	0.0350921	0.378562	yes	-0.693525	0.07555	0.403188	0.618341	no	-2.59524	5e-05	0.00369973	0.165484	yes	-2.05733	0.0002	0.027708	0.24026	yes
AC124890.1,SLC35E3	XLOC_011013	12:69139885-69187744	-1.42754	0.0004	0.0123123	0.371764	yes	-0.503067	0.33465	0.824619	0.705605	no	-0.87979	0.01785	0.258038	0.543447	no	0.164791	0.7367	0.999777	1.121	no
GPR111,GPR115	XLOC_042217	6:47624171-47689757	-1.48829	5e-05	0.00217877	0.356435	yes	-1.76733	5e-05	0.00116756	0.293752	yes	-0.830802	0.0022	0.0753798	0.562217	no	-1.1905	0.00015	0.022588	0.438151	yes
SRPX2	XLOC_057395	X:99899194-99987126	-1.53178	5e-05	0.00217877	0.34585	yes	-1.47795	5e-05	0.00116756	0.358999	yes	-0.537936	0.0746	0.541912	0.688756	no	-0.369287	0.22585	0.999777	0.774165	no
UBXN8	XLOC_047296	8:30589763-30624522	-1.5409	5e-05	0.00217877	0.343671	yes	-1.29718	5e-05	0.00116756	0.406921	yes	-1.11672	0.0001	0.00706142	0.461141	yes	-0.504711	0.0655	0.702895	0.704802	no
AGPAT9	XLOC_037041	4:84457066-84527028	-1.54309	0.0019	0.0415216	0.34315	yes	-1.43491	0.00085	0.0134723	0.36987	yes	-1.46548	0.0071	0.155296	0.362115	no	-0.928675	0.0183	0.417674	0.525341	no
MFI2	XLOC_036391	3:196715491-196756723	-1.55901	5e-05	0.00217877	0.339384	yes	-0.915705	0.00205	0.0278957	0.530085	yes	-1.65107	5e-05	0.00369973	0.318404	yes	-1.21359	0.00135	0.0964067	0.431194	no
C1orf116	XLOC_004666	1:207191865-207206101	-1.58571	5e-05	0.00217877	0.333161	yes	-1.25209	5e-05	0.00116756	0.41984	yes	-1.34899	5e-05	0.00369973	0.392567	yes	-0.932633	5e-05	0.00948904	0.523901	yes
NABP1	XLOC_028052	2:192542793-192554156	-1.58763	5e-05	0.00217877	0.332718	yes	-1.4472	5e-05	0.00116756	0.366732	yes	-0.801372	0.0167	0.251422	0.573803	no	-0.489738	0.14725	0.930914	0.712154	no
SLC16A2	XLOC_057288	X:73640755-73753752	-1.63209	5e-05	0.00217877	0.32262	yes	-1.55099	5e-05	0.00116756	0.341276	yes	-1.24731	5e-05	0.00369973	0.421233	yes	-0.765695	0.00125	0.0901953	0.58817	no
CENPT	XLOC_020016	16:67840667-67906470	-1.63339	5e-05	0.00217877	0.32233	yes	-1.2247	0.0006	0.0100295	0.427886	yes	-1.78132	5e-05	0.00369973	0.290917	yes	-1.29955	0.00245	0.139085	0.406253	no
CHN2	XLOC_044550	7:29034846-29553944	-1.65087	0.00015	0.00555	0.318448	yes	-1.28319	0.00255	0.0331089	0.410886	yes	-1.92885	5e-05	0.00369973	0.262638	yes	-1.24391	0.0034	0.162988	0.422227	no
HHLA1,OC90	XLOC_049167	8:133036466-133123406	-1.70499	0.00035	0.0110556	0.306723	yes	-0.838117	0.04105	0.269006	0.559373	no	-1.10916	0.0117	0.204728	0.463564	no	-0.355847	0.3785	0.999777	0.781411	no
ENOX1	XLOC_013707	13:43787653-44361044	-1.80126	0.00105	0.026464	0.286924	yes	-1.73504	0.00395	0.0472363	0.300401	yes	-1.4282	0.00845	0.171854	0.371594	no	-0.992551	0.0262	0.488526	0.502588	no
LETM2	XLOC_047354	8:38243724-38267045	-1.80324	5e-05	0.00217877	0.28653	yes	-1.3079	0.0002	0.00389186	0.403908	yes	-1.01154	0.0105	0.193721	0.496016	no	-0.448657	0.21995	0.999777	0.732725	no
PIK3C2G	XLOC_010498	12:18233802-18827813	-1.84789	5e-05	0.00217877	0.277798	yes	-1.7226	5e-05	0.00116756	0.303002	yes	-1.00843	0.0027	0.0851694	0.497087	no	-0.338354	0.2959	0.999777	0.790943	no
TPTEP1	XLOC_032437	22:17082776-17185367	-1.90791	5e-05	0.00217877	0.266478	yes	-1.71734	5e-05	0.00116756	0.304109	yes	-1.97159	5e-05	0.00369973	0.254972	yes	-0.782609	0.03005	0.524984	0.581315	no
-	XLOC_045763	7:7590305-7594809	-1.97951	0.0006	0.0171885	0.253576	yes	-2.1608	0.00035	0.00629054	0.223632	yes	-1.36243	0.00715	0.155899	0.388927	no	-1.13319	0.02035	0.441895	0.455907	no
ABCC2	XLOC_005880	10:101542411-101612243	-1.98701	0.00015	0.00555	0.252261	yes	-2.01311	5e-05	0.00116756	0.247739	yes	-0.853334	0.06825	0.520329	0.553504	no	-0.258421	0.5036	0.999777	0.836002	no
HSPA6	XLOC_001758	1:161494035-161496681	-1.9896	5e-05	0.00217877	0.251809	yes	-2.06075	5e-05	0.00116756	0.239691	yes	-2.1734	5e-05	0.00369973	0.221688	yes	-3.00308	5e-05	0.00948904	0.124733	yes
COL28A1	XLOC_045762	7:7395833-7575532	-2.00646	0.00025	0.00863186	0.248883	yes	-1.66785	0.0276	0.203344	0.314722	no	-1.25997	0.0078	0.163167	0.417553	no	-0.805097	0.1046	0.843689	0.572324	no
DUSP4	XLOC_048405	8:29190580-29208185	-2.03099	5e-05	0.00217877	0.244687	yes	-1.85724	5e-05	0.00116756	0.276004	yes	-1.72847	5e-05	0.00369973	0.301772	yes	-0.692161	0.00135	0.0964067	0.618926	no
NEFL	XLOC_048364	8:24808467-24814624	-2.11089	5e-05	0.00217877	0.231504	yes	-1.39798	5e-05	0.00116756	0.37946	yes	-2.14853	5e-05	0.00369973	0.225542	yes	-1.1013	5e-05	0.00948904	0.466096	yes
-	XLOC_030628	20:24911165-24913648	-2.29075	5e-05	0.00217877	0.204369	yes	-3.08926	5e-05	0.00116756	0.117501	yes	-1.88248	0.00025	0.0151867	0.271217	yes	-1.08471	0.00475	0.198212	0.471487	no
TNIK	XLOC_036158	3:170779127-171178231	-2.47095	5e-05	0.00217877	0.180372	yes	-2.76655	5e-05	0.00116756	0.146955	yes	-2.25171	5e-05	0.00369973	0.209975	yes	-1.66133	5e-05	0.00948904	0.316148	yes
ACOX2	XLOC_035467	3:58490862-58523046	-2.48848	5e-05	0.00217877	0.178194	yes	0.250617	0.5631	0.963919	1.18972	no	-1.36224	0.01225	0.210123	0.388978	no	-0.62886	0.20095	0.998471	0.646687	no
GSDMA	XLOC_020948	17:38119191-38135405	-2.6054	5e-05	0.00217877	0.164322	yes	-2.31926	5e-05	0.00116756	0.20037	yes	-2.42317	5e-05	0.00369973	0.186446	yes	-2.66595	5e-05	0.00948904	0.157568	yes
MANEAL	XLOC_000591	1:38259473-38266811	-2.70439	0.0001	0.00393125	0.153425	yes	-2.42253	5e-05	0.00116756	0.186529	yes	-2.09706	5e-05	0.00369973	0.233734	yes	-0.891293	0.0267	0.493342	0.539131	no
ABCG2	XLOC_038254	4:89011415-89152474	-2.92012	0.0001	0.00393125	0.132116	yes	-1.84805	0.0279	0.204962	0.277768	no	-1.2296	0.04955	0.440723	0.426436	no	-0.713423	0.14765	0.930914	0.609871	no
CD22	XLOC_024735	19:35810163-35838258	-2.94161	5e-05	0.00217877	0.130163	yes	-0.314658	0.41545	0.88859	0.804042	no	-3.17553	1	1	0.11068	no	-1.65247	1	1	0.318095	no
CACNA2D1	XLOC_046354	7:81575759-82073114	-3.12814	0.0001	0.00393125	0.114376	yes	-0.984791	0.18635	0.655827	0.505299	no	0.0741482	0.90535	0.994059	1.05274	no	-2.02503	0.0044	0.190493	0.2457	no
MYH15	XLOC_035665	3:108099215-108248169	-3.31242	0.0003	0.0100233	0.100661	yes	-2.27542	0.0007	0.0114142	0.206552	yes	-3.79414	1	1	0.0720859	no	-1.0492	0.04385	0.623075	0.483236	no
U6	XLOC_026094	19:39286942-39288035	-3.84543	5e-05	0.00217877	0.0695681	yes	-4.16516	5e-05	0.00116756	0.0557394	yes	-1.47009	0.08425	0.571333	0.36096	no	-2.09182	0.0249	0.474504	0.234585	no
AC137934.1	XLOC_019213	16:90252404-90289086	-4.36836	5e-05	0.00217877	0.0484164	yes	-4.76155	5e-05	0.00116756	0.0368664	yes	-1.8177	0.1111	0.628512	0.283673	no	-3.59277	0.00085	0.0718043	0.0828836	no
ALPK2	XLOC_023935	18:56148478-56296189	-6.15333	5e-05	0.00217877	0.0140496	yes	-4.61854	0.0003	0.00552166	0.0407081	yes	-4.72933	0.0001	0.00706142	0.037699	yes	-4.18542	5e-05	0.00948904	0.0549621	yes
TMPRSS11E	XLOC_036901	4:69313166-69366237	-6.82302	0.00135	0.0317568	0.00883215	yes	-5.16264	5e-05	0.00116756	0.0279184	yes	-5.21441	5e-05	0.00369973	0.0269343	yes	-3.41276	5e-05	0.00948904	0.0938981	yes
RP11-202P11.1	XLOC_006785	10:80703084-81076276	7.26489	0.00995	0.136831	153.798	no	8.31006	0.0109	0.102092	317.378	no	2.69815	1	1	6.48969	no	-0.272802	1	1	0.82771	no
ALX4	XLOC_009170	11:44281993-44331716	7.19979	0.24905	0.806092	147.012	no	8.57274	0.2264	0.706992	380.76	no	2.74689	1	1	6.71269	no	1.96837	1	1	3.91326	no
PI3	XLOC_030836	20:43803516-43805185	7.10465	0.0036	0.0674627	137.63	no	7.49538	0.0018	0.0249828	180.441	yes	3.87813	0.0054	0.13272	14.7039	no	1.04632	0.2531	0.999777	2.06526	no
STAB1	XLOC_033970	3:52529353-52742182	7.02434	1	1	130.178	no	7.73986	0.0015	0.0215828	213.762	yes	5.41523	1	1	42.6724	no	2.69301	1	1	6.46661	no
GDF15	XLOC_024518	19:18485540-18499987	6.84986	0.2216	0.779642	115.349	no	7.61026	0.22175	0.702499	195.396	no	3.80967	0.23265	0.801234	14.0225	no	3.03627	0.24145	0.999777	8.20367	no
CTD-2319I12.1	XLOC_022659	17:58156669-58169246	6.38493	0.1907	0.741424	83.571	no	6.26248	0.19035	0.660955	76.7705	no	5.64091	0.19065	0.760795	49.898	no	2.86901	1	1	7.30564	no
TNNI2	XLOC_007282	11:1859574-1862910	6.19975	0.2306	0.789233	73.504	no	6.75329	0.2288	0.70883	107.88	no	3.69026	1	1	12.9086	no	3.15461	1	1	8.90497	no
SERPINB3	XLOC_023973	18:61314812-61391127	6.09458	0.2531	0.809711	68.3363	no	4.25067	1	1	19.0362	no	5.08358	0.24915	0.813622	33.9086	no	2.78471	1	1	6.89098	no
MUC5B	XLOC_007269	11:1244295-1283406	6.08721	1	1	67.9881	no	8.44996	0.1889	0.659484	349.697	no	3.69899	1	1	12.9869	no	#N/A	#N/A	#N/A	#N/A	#N/A
RP11-459E5.1	XLOC_047212	8:22545171-22941132	5.99255	0.07105	0.472589	63.6704	no	6.21563	0.07115	0.387688	74.3175	no	2.02994	1	1	4.08388	no	#N/A	#N/A	#N/A	#N/A	#N/A
TTLL6	XLOC_022523	17:46839596-46894576	5.76291	1	1	54.3011	no	6.1509	0.1899	0.660719	71.0568	no	1.16047	1	1	2.2353	no	1.83326	1	1	3.56341	no
WFDC5	XLOC_031499	20:43738092-43743813	5.7017	0.25415	0.810387	52.0454	no	5.71354	0.2547	0.741796	52.4743	no	4.23643	0.25205	0.815004	18.8492	no	0.7237	1	1	1.65141	no
ZNF750	XLOC_022979	17:80709939-81009686	5.61472	0.0235	0.241459	49.0003	no	5.80492	0.00575	0.0634075	55.9056	no	3.23726	1	1	9.43001	no	-0.346128	1	1	0.786693	no
SERPINB4	XLOC_023972	18:61304492-61311544	5.57849	0.20305	0.762597	47.7851	no	4.5432	1	1	23.3152	no	5.18591	0.2038	0.776942	36.4011	no	4.23645	1	1	18.8494	no
C2orf54	XLOC_030411	2:241825464-241836306	5.43323	0.1945	0.746963	43.2081	no	7.28472	0.1948	0.667892	155.926	no	0.958838	1	1	1.94374	no	0.865967	1	1	1.82256	no
NFAM1	XLOC_033452	22:42776307-42833260	5.36425	0.2345	0.792257	41.1908	no	6.04104	0.22845	0.708607	65.8467	no	2.06979	1	1	4.19826	no	1.7193	1	1	3.29277	no
CTB-52I2.8	XLOC_024505	19:18062110-18110893	5.25656	1	1	38.2281	no	5.804	0.1965	0.670414	55.8699	no	2.60627	1	1	6.08927	no	1.88094	1	1	3.68315	no
CLDN19	XLOC_003205	1:43197075-43205994	5.08566	0.2095	0.769627	33.9575	no	6.33634	0.2094	0.686557	80.8032	no	0.938521	1	1	1.91656	no	0.776359	1	1	1.7128	no
SERPINA3,SERPINA4,SERPINA5	XLOC_014898	14:95027427-95090983	4.95549	0.18625	0.734591	31.0278	no	4.1835	0.18625	0.655626	18.1702	no	3.44716	1	1	10.9068	no	1.41598	1	1	2.66841	no
IP6K3	XLOC_043386	6:33689443-33714762	4.92024	1	1	30.2789	no	6.90995	0.24815	0.733563	120.255	no	#N/A	#N/A	#N/A	#N/A	#N/A	1.15555	1	1	2.22769	no
GAL3ST1	XLOC_033272	22:30950621-30970574	4.91289	0.18625	0.734591	30.125	no	6.86913	0.18625	0.655626	116.9	no	4.38593	1	1	20.9072	no	1.74211	1	1	3.34524	no
LRRC38	XLOC_002809	1:13801444-13842765	4.77526	1	1	27.384	no	4.64218	1	1	24.971	no	3.60984	1	1	12.2087	no	2.37505	1	1	5.18754	no
2016-03-03	XLOC_041088	5:126203405-126366500	4.67582	0.2135	0.773118	25.5601	no	4.50567	05:07:52.320000	0.692372	22.7165	no	3.42875	1	1	10.7685	no	2.45516	1	1	5.48374	no
LAPTM5	XLOC_003046	1:31205315-31230667	4.66465	0.22445	0.782612	25.3629	no	5.84667	0.21705	0.696847	57.547	no	1.82194	1	1	3.53556	no	#N/A	#N/A	#N/A	#N/A	#N/A
-	XLOC_046062	7:47673548-47675045	4.61022	0.11255	0.596214	24.4239	no	4.45385	0.0876	0.440448	21.915	no	1.8667	1	1	3.64697	no	0.432488	1	1	1.34956	no
IL34	XLOC_018998	16:70613797-70694585	4.58402	1	1	23.9843	no	4.80424	0.20105	0.677028	27.9396	no	3.96806	1	1	15.6497	no	2.8077	1	1	7.00167	no
KCNQ2	XLOC_031690	20:62037541-62103993	4.53702	1	1	23.2156	no	6.0936	0.1896	0.660126	68.2899	no	1.25336	1	1	2.38396	no	-0.0233344	1	1	0.983956	no
C3orf30,RP11-484M3.5,UPK1B	XLOC_034321	3:118864996-118924000	4.53575	1	1	23.1951	no	4.81551	1	1	28.1587	no	3.8771	1	1	14.6934	no	3.70586	1	1	13.0489	no
KRT79	XLOC_012148	12:53215193-53228407	4.51925	1	1	22.9314	no	7.40652	0.24415	0.728369	169.662	no	0.979065	1	1	1.97119	no	#N/A	#N/A	#N/A	#N/A	#N/A
CLCNKA	XLOC_000252	1:16340522-16360545	4.4521	1	1	21.8885	no	6.05817	0.1897	0.660324	66.6332	no	#N/A	#N/A	#N/A	#N/A	#N/A	1.34544	1	1	2.54108	no
PLA2G2F	XLOC_000308	1:20465818-20476879	4.41431	1	1	21.3226	no	5.41996	0.24095	0.725602	42.8125	no	3.16221	1	1	8.952	no	-0.292107	1	1	0.816708	no
CXXC4	XLOC_038338	4:105389468-106041157	4.3969	1	1	21.0668	no	5.77724	0.2186	0.698451	54.8432	no	1.29455	1	1	2.453	no	2.4627	1	1	5.51247	no
GRID1	XLOC_006832	10:87359311-88126250	4.3632	1	1	20.5804	no	5.3188	0.1972	0.671305	39.9134	no	3.21295	1	1	9.27245	no	2.52012	1	1	5.7363	no
HLA-DQB1	XLOC_043354	6:32627243-32636160	4.36032	1	1	20.5394	no	6.05421	0.18625	0.655626	66.4506	no	#N/A	#N/A	#N/A	#N/A	#N/A	#N/A	#N/A	#N/A	#N/A	#N/A
CTC-246B18.2	XLOC_026111	19:39726051-39728524	4.35647	1	1	20.4846	no	5.82677	0.24385	0.728369	56.7587	no	1.48115	1	1	2.79171	no	#N/A	#N/A	#N/A	#N/A	#N/A
NKAPP1	XLOC_058676	X:119170200-119379122	4.34872	1	1	20.3749	no	4.00543	1	1	16.0603	no	3.39032	1	1	10.4855	no	2.69935	1	1	6.49509	no
IL3RA	XLOC_056714	X:1455508-1501578	4.30193	0.0058	0.0935436	19.7247	no	6.27482	0.00255	0.0331089	77.43	yes	2.04086	1	1	4.11491	no	0.760624	1	1	1.69422	no
SPRR2A	XLOC_004076	1:153028588-153030013	4.28155	0.0091	0.129195	19.448	no	3.93941	0.0049	0.0562654	15.342	no	3.21241	0.0148	0.235806	9.26898	no	-2.50329	1	1	0.176374	no
IL28B	XLOC_026112	19:39734245-39735646	4.26316	0.24905	0.806092	19.2017	no	3.90948	0.22645	0.706992	15.0269	no	4.36809	0.2446	0.809439	20.6503	no	2.90149	1	1	7.47198	no
GCGR	XLOC_021564	17:79762007-79771889	4.25277	1	1	19.0639	no	3.71932	1	1	13.1712	no	#N/A	#N/A	#N/A	#N/A	#N/A	#N/A	#N/A	#N/A	#N/A	#N/A
AIRE	XLOC_031983	21:45705523-45718616	4.23292	1	1	18.8034	no	6.06293	0.0001	0.00213617	66.8534	yes	#N/A	#N/A	#N/A	#N/A	#N/A	#N/A	#N/A	#N/A	#N/A	#N/A
CTA-373H7.7	XLOC_033218	22:27042391-27176170	4.22345	1	1	18.6804	no	5.19205	1	1	36.5563	no	2.11946	1	1	4.34531	no	#N/A	#N/A	#N/A	#N/A	#N/A
HPGD	XLOC_038766	4:175411327-175444305	4.14895	1	1	17.7402	no	4.31549	1	1	19.9109	no	2.46043	1	1	5.50381	no	2.1093	1	1	4.31482	no
AL450992.6,AL591893.1	XLOC_001546	1:151967006-152020383	4.09493	1	1	17.0882	no	2.41884	1	1	5.34741	no	1.303	1	1	2.46741	no	#N/A	#N/A	#N/A	#N/A	#N/A
CTB-167B5.2	XLOC_046379	7:87834432-87936234	4.08158	1	1	16.9308	no	2.90921	1	1	7.51207	no	2.93815	1	1	7.66428	no	0.0751045	1	1	1.05344	no
IL13RA2	XLOC_058635	X:114238537-114254540	4.02831	0.241	0.798934	16.3171	no	4.29301	0.24425	0.728369	19.6031	no	0.463984	1	1	1.37935	no	#N/A	#N/A	#N/A	#N/A	#N/A
RP11-689P11.2	XLOC_036513	4:8367835-8514337	4.02398	1	1	16.2682	no	3.26902	1	1	9.63991	no	4.86525	1	1	29.1465	no	3.466	1	1	11.0502	no
RFPL1-AS1	XLOC_033248	22:29832817-29874115	4.01473	1	1	16.1642	no	0.472741	1	1	1.38774	no	-0.268337	1	1	0.830276	no	3.41634	1	1	10.6763	no
CHST13	XLOC_034409	3:126243125-126277808	4.00742	1	1	16.0825	no	5.72307	0.2398	0.723992	52.8221	no	2.69464	1	1	6.47392	no	0.975197	1	1	1.96591	no
CTB-92J24.2	XLOC_024634	19:24097677-24140732	3.99837	1	1	15.9819	no	3.76531	1	1	13.5979	no	3.37243	1	1	10.3563	no	3.59291	1	1	12.0663	no
RP11-521C20.3	XLOC_016501	15:40380090-40401093	3.98115	0.3612	0.915787	15.7923	no	5.62326	0.2519	0.738228	49.2913	no	0.998952	1	1	1.99855	no	1.31942	1	1	2.49566	no
-	XLOC_008808	11:2950756-2953219	3.93468	1	1	15.2917	no	4.6693	1	1	25.4448	no	0.230247	1	1	1.17304	no	0.910642	1	1	1.87988	no
ALOX5	XLOC_005429	10:45869660-45948569	3.93461	1	1	15.291	no	4.6432	0.21225	0.689249	24.9886	no	1.35871	1	1	2.56456	no	-0.0184232	1	1	0.987311	no
CORIN	XLOC_037963	4:47596014-47840123	3.93183	1	1	15.2616	no	2.22887	1	1	4.68767	no	2.68032	1	1	6.40998	no	-0.863289	1	1	0.549698	no
AC005592.1	XLOC_039877	5:142124790-142140563	3.89264	1	1	14.8526	no	3.96853	1	1	15.6548	no	2.59119	1	1	6.02596	no	1.5486	1	1	2.92533	no
AL354898.1,HMCN2	XLOC_050307	9:133258952-133309510	3.86341	0.2072	0.767807	14.5547	no	5.68094	0.19775	0.672423	51.3019	no	-0.682097	1	1	0.623259	no	-0.733398	1	1	0.601486	no
TAL1	XLOC_003281	1:47681962-47697892	3.8201	1	1	14.1242	no	2.78749	1	1	6.90428	no	0.94961	1	1	1.93135	no	-0.0257721	1	1	0.982295	no
RP11-169D4.1	XLOC_008180	11:72281703-72284273	3.81738	1	1	14.0976	no	4.4873	1	1	22.4291	no	1.23022	1	1	2.34603	no	2.55198	1	1	5.86439	no
DIO2	XLOC_015811	14:80663872-80921812	3.81625	1	1	14.0866	no	3.1728	1	1	9.01795	no	3.78135	1	1	13.7499	no	0.780214	1	1	1.71739	no
C3orf65	XLOC_034854	3:185360612-185542844	3.8139	1	1	14.0637	no	2.28784	1	1	4.88324	no	4.61311	1	1	24.4728	no	#N/A	#N/A	#N/A	#N/A	#N/A
2016-09-14	XLOC_046105	7:55861236-55930482	3.79867	1	1	13.916	no	0.129314	1900-01-01	1	1.09377	no	0.975841	1	1	1.96679	no	1.7966	1	1	3.47401	no
KLHDC7B	XLOC_033012	22:50986461-50989451	3.79128	1	1	13.8449	no	3.96106	1	1	15.5739	no	3.41345	1	1	10.6549	no	1.97073	1	1	3.91966	no
DNAAF1	XLOC_019122	16:84178864-84220669	3.78427	1	1	13.7778	no	2.51334	1	1	5.7094	no	1.37797	1	1	2.59902	no	0.378026	1	1	1.29956	no
C6orf223	XLOC_042186	6:43963338-44045689	3.76587	1	1	13.6032	no	2.98	1	1	7.88986	no	-0.650789	1	1	0.636932	no	0.191605	1	1	1.14203	no
-	XLOC_000076	1:2472919-2477248	3.76199	1	1	13.5666	no	5.22602	0.01065	0.100179	37.4273	no	#N/A	#N/A	#N/A	#N/A	#N/A	-2.15617	1	1	0.224351	no
NBEA	XLOC_013063	13:35516423-36247159	3.74812	1	1	13.4368	no	3.78441	1	1	13.7791	no	2.78977	1	1	6.9152	no	2.23851	1	1	4.71909	no
ONECUT3	XLOC_024129	19:1752371-1780987	3.74171	1	1	13.3773	no	5.27636	1	1	38.7563	no	-0.0255638	1	1	0.982437	no	2.44035	1	1	5.42773	no
FADS6	XLOC_022811	17:72873427-72889708	3.741	0.00245	0.0507069	13.3707	no	5.46424	0.00075	0.0120877	44.1469	yes	1.28812	1	1	2.4421	no	1.09803	1	1	2.14062	no
RP11-597K23.2	XLOC_016981	15:82380934-82390035	3.73421	1	1	13.3079	no	3.97485	1	1	15.7235	no	0.774133	1	1	1.71016	no	#N/A	#N/A	#N/A	#N/A	#N/A
PEBP4	XLOC_047215	8:22545171-22941132	3.71291	1	1	13.1129	no	4.29007	0.29035	0.781024	19.5632	no	1.22509	1	1	2.3377	no	#N/A	#N/A	#N/A	#N/A	#N/A
SNCAIP	XLOC_039653	5:121647048-121814782	3.70261	1	1	13.0196	no	2.27913	1	1	4.85385	no	2.3121	1	1	4.96605	no	1.04731	1	1	2.06667	no
LPL	XLOC_047180	8:19759227-19824769	3.69847	1	1	12.9823	no	#N/A	#N/A	#N/A	#N/A	#N/A	#N/A	#N/A	#N/A	#N/A	#N/A	#N/A	#N/A	#N/A	#N/A	#N/A
CHRM1	XLOC_009452	11:62676150-62689279	3.68604	1	1	12.8709	no	4.89931	1	1	29.8428	no	#N/A	#N/A	#N/A	#N/A	#N/A	#N/A	#N/A	#N/A	#N/A	#N/A
-	XLOC_035824	3:128276479-128278474	3.67756	1	1	12.7955	no	6.16351	0.2551	0.741796	71.6806	no	#N/A	#N/A	#N/A	#N/A	#N/A	#N/A	#N/A	#N/A	#N/A	#N/A
SLC11A1	XLOC_028286	2:219246751-219261617	3.6681	1	1	12.7118	no	4.42726	1	1	21.5148	no	3.37412	1	1	10.3684	no	2.93059	1	1	7.62422	no
EIF4E1B	XLOC_040134	5:176057682-176073642	3.6608	0.2018	0.760261	12.6477	no	5.73524	0.19425	0.666903	53.2696	no	#N/A	#N/A	#N/A	#N/A	#N/A	#N/A	#N/A	#N/A	#N/A	#N/A
-	XLOC_038239	4:87741700-87742529	3.63025	0.24935	0.806092	12.3827	no	3.65983	0.2032	0.680131	12.6392	no	3.48672	1	1	11.21	no	1.42197	1	1	2.67951	no
TNFAIP6	XLOC_027808	2:152214105-152236560	3.62965	0.24175	0.800137	12.3775	no	4.20803	0.241	0.725609	18.4818	no	-0.277273	1	1	0.825149	no	#N/A	#N/A	#N/A	#N/A	#N/A
PLCE1	XLOC_005827	10:95753745-96122735	3.59338	1	1	12.0702	no	2.6921	1	1	6.46253	no	1.42067	1	1	2.6771	no	3.85496	1	1	14.4697	no
AL031663.2	XLOC_030844	20:44074070-44077220	3.58982	1	1	12.0405	no	0.706879	1	1	1.63227	no	-0.270527	1	1	0.829017	no	3.14035	1	1	8.81738	no
RP5-1063M23.2	XLOC_010295	12:3426122-3434509	3.58814	1	1	12.0265	no	3.9324	1	1	15.2676	no	2.60532	1	1	6.08526	no	1.07884	1	1	2.11234	no
RASGRP1	XLOC_017406	15:38780303-38857776	3.57154	1	1	11.8889	no	2.84735	1	1	7.19677	no	3.03495	1	1	8.19617	no	0.66964	1	1	1.59068	no
-	XLOC_019515	16:17663975-17664718	3.56258	0.2494	0.806092	11.8153	no	2.20703	1	1	4.61724	no	2.39202	1	1	5.24892	no	0.889698	1	1	1.85279	no
CTA-126B4.7	XLOC_033453	22:42833348-42846886	3.56218	0.13015	0.632476	11.812	no	3.58718	0.1643	0.614755	12.0185	no	1.27298	1	1	2.4166	no	#N/A	#N/A	#N/A	#N/A	#N/A
C12orf68	XLOC_010689	12:48577365-48579709	3.55783	1	1	11.7764	no	4.4812	1	1	22.3345	no	#N/A	#N/A	#N/A	#N/A	#N/A	0.972148	1	1	1.96176	no
IL29	XLOC_024832	19:39786964-39789313	3.54433	0.1443	0.662306	11.6667	no	3.41932	0.10955	0.494493	10.6984	no	4.15637	0.15715	0.716738	17.8317	no	2.2364	1	1	4.7122	no
-	XLOC_008047	11:65682591-65686605	3.51153	0.4578	0.962085	11.4045	no	4.13297	0.4803	0.929349	17.5448	no	2.08465	1	1	4.24172	no	1.69634	1	1	3.24078	no
HGFAC	XLOC_036462	4:3443263-3451211	3.50948	1	1	11.3883	no	4.07501	0.0015	0.0215828	16.8539	yes	#N/A	#N/A	#N/A	#N/A	#N/A	1.75738	1	1	3.38084	no
EFCAB5	XLOC_020773	17:27887564-28513493	3.50595	1	1	11.3605	no	3.60487	1	1	12.1667	no	0.189492	1	1	1.14036	no	2.80415	1	1	6.98447	no
ELN	XLOC_044926	7:73442118-73484237	3.48802	1	1	11.2201	no	5.31138	1	1	39.7086	no	3.13507	1	1	8.78517	no	2.77986	1	1	6.86786	no
RAI2	XLOC_058001	X:17818170-17879457	3.48288	1	1	11.1802	no	4.16086	1	1	17.8873	no	0.65172	1	1	1.57104	no	0.144606	1	1	1.10543	no
-	XLOC_047643	8:79850711-79888109	3.47206	0.26335	0.8196	11.0967	no	2.2041	1	1	4.60787	no	0.985375	1	1	1.97983	no	-0.0130376	1	1	0.991004	no
AQP6	XLOC_010732	12:50360976-50426919	3.45701	1	1	10.9816	no	4.54975	1	1	23.4213	no	2.57501	1	1	5.95875	no	1.80408	1	1	3.49206	no
LINC00461,MIR9-2	XLOC_040858	5:87803362-88762215	3.45461	1	1	10.9633	no	3.50718	1	1	11.3702	no	2.11872	1	1	4.34308	no	3.68184	1	1	12.8335	no
NOTUM	XLOC_022949	17:79910387-79919716	3.45266	1	1	10.9485	no	3.29816	1	1	9.8366	no	1.49201	1	1	2.81281	no	-0.681253	1	1	0.623623	no
MAP7D2	XLOC_058017	X:20024830-20135035	3.43054	0.1929	0.745176	10.7819	no	4.06908	0.1909	0.66209	16.7848	no	1.46571	1	1	2.76199	no	1.34327	1	1	2.53726	no
RASSF2	XLOC_031135	20:4760668-4804291	3.42953	1	1	10.7744	no	6.19598	0.21	0.686608	73.3121	no	-0.977717	1	1	0.507783	no	0.698495	1	1	1.62281	no
U8	XLOC_049592	9:38096383-38311161	3.42873	0.1297	0.631562	10.7684	no	4.4796	0.14375	0.573612	22.3097	no	-0.00937871	1	1	0.99352	no	#N/A	#N/A	#N/A	#N/A	#N/A
METTL7A	XLOC_010754	12:51317254-51326300	3.42684	1	1	10.7543	no	3.05949	1	1	8.33678	no	2.59979	1	1	6.06198	no	2.158	1	1	4.46296	no
RP11-861E21.2	XLOC_023117	18:12438888-12725739	3.42498	0.08715	0.524459	10.7404	no	2.29981	1	1	4.92393	no	2.71688	1	1	6.57449	no	2.91319	1	1	7.53282	no
MAP4K1	XLOC_026090	19:39078280-39109522	3.4104	0.1917	0.742722	10.6324	no	2.74525	1	1	6.70506	no	1.27757	1	1	2.4243	no	-0.00334055	1	1	0.997687	no
DACH2	XLOC_057351	X:85403461-86087607	3.40261	1	1	10.5752	no	3.96781	1	1	15.647	no	4.79327	1	1	27.728	no	1.68161	1	1	3.20786	no
CTB-138E5.1	XLOC_039767	5:134779904-134794387	3.39794	0.1329	0.638547	10.541	no	2.80675	0.1503	0.586666	6.99707	no	0.508853	1	1	1.42292	no	1.0054	1	1	2.0075	no
RNF212	XLOC_037691	4:1050037-1107350	3.39542	1	1	10.5226	no	2.96894	1	1	7.82961	no	2.21743	1	1	4.65064	no	-0.104369	1	1	0.930212	no
AMTN	XLOC_036938	4:71384256-71398459	3.39244	0.0059	0.0948392	10.5009	no	3.20834	0.00375	0.0452693	9.24286	yes	2.05397	0.03385	0.365596	4.15247	no	1.17784	1	1	2.26238	no
-	XLOC_032343	21:44605184-44614199	3.38543	0.0062	0.0982425	10.45	no	4.18122	0.00225	0.029951	18.1415	yes	1.05719	1	1	2.08087	no	1.62146	1	1	3.07686	no
RP11-616M22.6	XLOC_019252	16:1310952-1313846	3.38066	1	1	10.4155	no	4.35584	0.2328	0.714595	20.4757	no	0.223662	1	1	1.16769	no	#N/A	#N/A	#N/A	#N/A	#N/A
C3orf74	XLOC_035410	3:52094444-52097567	3.37435	1	1	10.37	no	6.16123	0.2328	0.714595	71.5674	no	-0.270571	1	1	0.828991	no	#N/A	#N/A	#N/A	#N/A	#N/A
KRT16P3	XLOC_021972	17:20352707-20603227	3.37246	0.0214	0.227475	10.3565	no	3.9896	0.00865	0.0860219	15.8851	no	2.46119	0.03185	0.355578	5.50671	no	1.24967	1	1	2.37787	no
APOBEC3A	XLOC_032875	22:39348745-39359188	3.36399	0.2402	0.79846	10.2958	no	4.41404	0.22745	0.707946	21.3186	no	1.73247	1	1	3.32296	no	-0.904296	1	1	0.534293	no
SMOC1	XLOC_014701	14:70320847-70499083	3.3604	1	1	10.2703	no	4.82588	0.00125	0.0186161	28.3619	yes	0.989934	1	1	1.98609	no	2.23047	1	1	4.69287	no
CRYBA2	XLOC_030209	2:219854910-219858143	3.3496	0.19855	0.753711	10.1937	no	3.34282	0.20165	0.678003	10.1459	no	2.66984	0.21275	0.786018	6.36359	no	2.0291	1	1	4.0815	no
CHGA	XLOC_014882	14:93389424-93401638	3.32785	1	1	10.0411	no	3.13534	1	1	8.78681	no	2.25321	1	1	4.76742	no	1.64884	1	1	3.13581	no
HAR1A	XLOC_031030	20:61727149-61735738	3.30734	0.00315	0.0610872	9.89939	no	2.5154	0.0101	0.0964292	5.71756	no	1.21621	1	1	2.32336	no	0.272977	1	1	1.2083	no
PAQR5	XLOC_016818	15:69591285-69740764	3.29547	0.00555	0.0910338	9.81828	no	2.46876	0.0228	0.17765	5.53568	no	0.87013	0.3993	0.917483	1.82783	no	0.177036	1	1	1.13056	no
SLC47A2	XLOC_021956	17:19581323-19625741	3.29445	1	1	9.81134	no	4.57781	5e-05	0.00116756	23.8813	yes	0.0954093	1	1	1.06837	no	0.311679	1	1	1.24115	no
AC025627.9	XLOC_021974	17:20352707-20603227	3.28424	1	1	9.74215	no	3.9684	1	1	15.6534	no	2.91665	1	1	7.55091	no	0.177985	1	1	1.1313	no
RDH8	XLOC_024305	19:10123924-10132955	3.27465	1	1	9.6776	no	4.05304	0.22695	0.707421	16.5992	no	#N/A	#N/A	#N/A	#N/A	#N/A	#N/A	#N/A	#N/A	#N/A	#N/A
LCNL1,PTGDS	XLOC_050422	9:139871955-139880862	3.27421	0.1885	0.738032	9.67465	no	2.61594	0.19295	0.666028	6.13022	no	1.20907	1	1	2.31189	no	0.00851804	1	1	1.00592	no
EGLN3	XLOC_015372	14:34393436-34931980	3.27156	0.0111	0.14692	9.6569	no	1.68162	0.0343	0.23803	3.20788	no	2.8573	0.02065	0.280256	7.24658	no	0.301924	0.6859	0.999777	1.23279	no
-	XLOC_042193	6:44206783-44207333	3.26328	0.2498	0.806826	9.60163	no	4.0044	0.2032	0.680131	16.0489	no	#N/A	#N/A	#N/A	#N/A	#N/A	#N/A	#N/A	#N/A	#N/A	#N/A
-	XLOC_046068	7:48148340-48154046	3.23354	1	1	9.40573	no	5.26278	0.25115	0.737306	38.3932	no	-0.609233	1	1	0.655545	no	-1.61698	1	1	0.326017	no
SPON1	XLOC_007475	11:13983913-14295237	3.23263	1	1	9.3998	no	0.714632	1	1	1.64106	no	1.24873	1	1	2.37632	no	2.22609	1	1	4.67864	no
CSDC2	XLOC_032915	22:41956766-41985894	3.23116	1	1	9.39023	no	5.57354	0.0601	0.348589	47.6215	no	-0.718097	1	1	0.607899	no	-1.87781	1	1	0.272096	no
ADAM33	XLOC_031120	20:3648611-3662893	3.22545	1	1	9.35313	no	4.57778	0.2069	0.68319	23.8808	no	-1.54029	1	1	0.343816	no	#N/A	#N/A	#N/A	#N/A	#N/A
-	XLOC_047645	8:79850711-79888109	3.21024	0.1949	0.747711	9.25504	no	2.246	1	1	4.74366	no	2.6453	1	1	6.25626	no	1.16824	1	1	2.24737	no
-	XLOC_011508	12:127715727-127716774	3.19922	1	1	9.18462	no	3.78506	0.20325	0.680131	13.7853	no	2.96096	1	1	7.78642	no	0.714716	1	1	1.64116	no
MIR4686	XLOC_008796	11:2185158-2200498	3.18838	1	1	9.11587	no	4.4108	0.2278	0.708171	21.2708	no	1.16805	1	1	2.24708	no	-0.155601	1	1	0.897758	no
-	XLOC_049595	9:38096383-38311161	3.18562	1	1	9.09845	no	2.33421	1	1	5.04275	no	#N/A	#N/A	#N/A	#N/A	#N/A	#N/A	#N/A	#N/A	#N/A	#N/A
JAM2	XLOC_031805	21:27011583-27144771	3.18501	1	1	9.0946	no	1.33401	1	1	2.52102	no	1.19937	1	1	2.29639	no	2.21842	1	1	4.65383	no
-	XLOC_000073	1:2466929-2469611	3.18119	1	1	9.07055	no	4.85025	0.03365	0.234798	28.845	no	-1.77838	1	1	0.291511	no	-0.780949	1	1	0.581984	no
-	XLOC_042194	6:44207521-44208360	3.17871	1	1	9.05497	no	4.01969	0.2264	0.706992	16.2199	no	-0.0152184	1	1	0.989507	no	0.319013	1	1	1.24748	no
OLFML2B	XLOC_004293	1:161952981-161993644	3.16025	1	1	8.93985	no	3.77321	1	1	13.6725	no	-0.975722	1	1	0.508485	no	#N/A	#N/A	#N/A	#N/A	#N/A
RP11-368D24__A.1	XLOC_057194	X:64808260-64820630	3.15056	0.2545	0.810387	8.88	no	3.16634	0.25275	0.739727	8.97766	no	-0.232619	1	1	0.851088	no	1.60782	1	1	3.04791	no
CEND1	XLOC_008765	11:787103-790123	3.14946	1	1	8.87323	no	3.04678	0.0172	0.143286	8.26365	no	#N/A	#N/A	#N/A	#N/A	#N/A	0.896275	1	1	1.86125	no
ART5	XLOC_008824	11:3659732-3663546	3.14914	1	1	8.87127	no	4.46657	0.21185	0.688828	22.1091	no	0.666356	1	1	1.58706	no	1.64296	1	1	3.12306	no
CTD-2521M24.8	XLOC_025809	19:17516502-17544533	3.14829	0.43665	0.955246	8.86604	no	2.34392	1	1	5.0768	no	1.77577	1	1	3.42421	no	0.319411	1	1	1.24782	no
PHACTR1	XLOC_041684	6:12717892-13328776	3.14578	1	1	8.85063	no	2.4954	1	1	5.63885	no	2.39125	1	1	5.24612	no	2.25609	1	1	4.77695	no
CDHR4	XLOC_035373	3:49828164-49837268	3.14454	1	1	8.84303	no	4.18125	0.1978	0.672423	18.1419	no	2.17933	1	1	4.52943	no	-1.4589	1	1	0.36377	no
NRG2	XLOC_041214	5:139226363-139422884	3.14366	1	1	8.83763	no	5.09232	5e-05	0.00116756	34.1147	yes	1.0665	1	1	2.09435	no	-0.0415601	1	1	0.971604	no
SYN3	XLOC_032797	22:32908538-33454358	3.118	1	1	8.68183	no	3.23305	1	1	9.40254	no	1.47543	1	1	2.78067	no	0.190227	1	1	1.14094	no
CTC-510F12.2	XLOC_024333	19:11309942-11373174	3.11279	0.4258	0.947125	8.65054	no	1.9683	1	1	3.91307	no	2.64191	1	1	6.24157	no	2.64261	1	1	6.2446	no
RNF157-AS1	XLOC_021466	17:74132413-74236454	3.09182	1	1	8.52571	no	3.36265	1	1	10.2863	no	#N/A	#N/A	#N/A	#N/A	#N/A	#N/A	#N/A	#N/A	#N/A	#N/A
SMAD6	XLOC_016796	15:66994565-67074338	3.07499	1	1	8.42683	no	4.07428	5e-05	0.00116756	16.8454	yes	1.85362	1	1	3.61406	no	1.65815	1	1	3.15612	no
RP11-806H10.4	XLOC_021507	17:76356533-76369992	3.07457	1	1	8.42438	no	2.51073	1	1	5.69908	no	1.50542	1	1	2.83907	no	#N/A	#N/A	#N/A	#N/A	#N/A
RP11-78F17.1	XLOC_022999	18:976589-1174824	3.07365	1	1	8.41901	no	3.27347	0.20095	0.67684	9.66969	no	0.988237	1	1	1.98376	no	0.992013	1	1	1.98896	no
SOX8	XLOC_018183	16:1031807-1036979	3.07093	1	1	8.40315	no	5.04919	0.00015	0.00305086	33.1099	yes	-0.931939	1	1	0.524153	no	-1.68307	1	1	0.311419	no
EFNA2	XLOC_024116	19:1285889-1378430	3.06894	1	1	8.39157	no	3.29608	1	1	9.82243	no	#N/A	#N/A	#N/A	#N/A	#N/A	-0.435204	1	1	0.739589	no
RP3-395M20.8	XLOC_002676	1:2481358-2497061	3.06339	0.0135	0.168366	8.35935	no	2.23211	1	1	4.69821	no	0.688825	1	1	1.61197	no	0.843857	1	1	1.79484	no
DNAJC12	XLOC_006663	10:69556426-69597924	3.06308	1	1	8.35755	no	3.99816	1	1	15.9796	no	3.94966	1	1	15.4513	no	0.932804	1	1	1.90898	no
C9orf24	XLOC_050702	9:34379016-34397830	3.06285	0.20295	0.76242	8.35622	no	1.37035	1	1	2.58533	no	0.872672	1	1	1.83105	no	1.06943	1	1	2.0986	no
SLC39A2	XLOC_014164	14:21467413-21470030	3.05657	1	1	8.31992	no	3.30186	0.23385	0.715777	9.86186	no	1.83095	1	1	3.55771	no	0.456407	1	1	1.37212	no
NOVA1	XLOC_015331	14:26912298-27066960	3.04458	1	1	8.25106	no	3.86263	1	1	14.5468	no	1.1083	1	1	2.15591	no	1.52109	1	1	2.87008	no
RP11-510J16.5	XLOC_020177	16:82068608-82173236	3.04119	1	1	8.2317	no	0.810416	1	1	1.75372	no	2.49141	1	1	5.62327	no	2.80112	1	1	6.96981	no
NUDT10	XLOC_057094	X:51075082-51080377	3.03994	1	1	8.22457	no	2.22501	1	1	4.67514	no	1.75068	1	1	3.36517	no	0.318766	1	1	1.24726	no
CTA-292E10.6	XLOC_032731	22:29196670-29244547	3.03697	0.22595	0.783311	8.20765	no	2.43568	1	1	5.41019	no	2.18677	1	1	4.55285	no	2.48762	1	1	5.60852	no
CTD-3193O13.1	XLOC_025587	19:7981029-7984042	3.01458	0.1133	0.59909	8.08126	no	2.97274	0.1001	0.471812	7.85026	no	2.58235	0.15275	0.712816	5.98914	no	2.20824	0.2865	0.999777	4.62111	no
LOXL4	XLOC_006953	10:100007446-100028490	3.01302	1	1	8.07252	no	4.69572	0.24755	0.732497	25.9151	no	0.0339669	1	1	1.02382	no	0.183139	1	1	1.13535	no
DMBX1	XLOC_000734	1:46955896-46980133	3.0119	1	1	8.06626	no	4.70112	0.2509	0.737275	26.0123	no	-0.0236804	1	1	0.98372	no	0.55539	1	1	1.46957	no
RHPN1-AS1	XLOC_049237	8:144448800-144450718	3.00923	1	1	8.05135	no	3.76386	1	1	13.5842	no	2.06565	1	1	4.18623	no	0.973651	1	1	1.9638	no
-	XLOC_042183	6:43690522-43737745	3.00883	1	1	8.04911	no	3.53651	1	1	11.6037	no	1.12215	1	1	2.17671	no	1.29741	1	1	2.45787	no
RP11-465L10.10	XLOC_031529	20:44637546-44688789	3.00406	0.01875	0.208498	8.02255	no	3.89531	0.00285	0.0363256	14.8801	yes	-0.135348	0.9266	0.994059	0.91045	no	-0.650964	0.5944	0.999777	0.636855	no
RP11-495P10.6	XLOC_001445	1:147744013-147762960	2.99472	1	1	7.97077	no	1.72619	1	1	3.30853	no	3.63055	1	1	12.3852	no	1.73118	1	1	3.31999	no
GPR61	XLOC_001227	1:110082493-110091028	2.99447	1	1	7.96939	no	2.82187	1	1	7.07078	no	3.55493	1	1	11.7528	no	4.61727	1	1	24.5435	no
SH2D4B	XLOC_005723	10:82297657-82406316	2.99441	1	1	7.96906	no	2.356	1	1	5.11949	no	2.10719	1	1	4.30851	no	3.45454	1	1	10.9628	no
CPA5	XLOC_046726	7:129984629-130008571	2.98851	0.0029	0.0575505	7.93654	no	3.28534	0.00075	0.0120877	9.74958	yes	0.627965	1	1	1.54538	no	-0.766254	1	1	0.587942	no
NT5C1A	XLOC_003167	1:40121986-40137791	2.98024	1	1	7.89117	no	5.53734	1	1	46.4414	no	#N/A	#N/A	#N/A	#N/A	#N/A	#N/A	#N/A	#N/A	#N/A	#N/A
LAG3	XLOC_010338	12:6881677-6887621	2.97891	1	1	7.8839	no	1.48091	1	1	2.79125	no	1.66004	1	1	3.16025	no	3.30213	1	1	9.86371	no
PCDH12	XLOC_041238	5:141323149-141369856	2.97766	1	1	7.87707	no	4.4237	0.0247	0.186653	21.4618	no	0.940535	1	1	1.91924	no	0.30864	1	1	1.23854	no
TMIE	XLOC_033879	3:46736047-46752376	2.97744	1	1	7.87587	no	4.4769	1	1	22.268	no	1.91792	1	1	3.77878	no	#N/A	#N/A	#N/A	#N/A	#N/A
-	XLOC_006788	10:81077596-81078381	2.97047	1	1	7.83792	no	4.09767	0.2032	0.680131	17.1207	no	#N/A	#N/A	#N/A	#N/A	#N/A	0.891591	1	1	1.85522	no
STAC2	XLOC_022265	17:37366788-37382162	2.9624	1	1	7.79419	no	5.181	0.00335	0.0411552	36.2774	yes	-0.287841	1	1	0.819127	no	-0.509076	1	1	0.702672	no
C11orf42	XLOC_007382	11:6226795-6232362	2.95714	1	1	7.76583	no	0.720756	1	1	1.64805	no	0.486105	1	1	1.40066	no	#N/A	#N/A	#N/A	#N/A	#N/A
SYT2	XLOC_004594	1:202559723-202679545	2.95495	1	1	7.75405	no	2.48173	1	1	5.58567	no	2.31737	1	1	4.98423	no	2.61241	1	1	6.11524	no
RP11-102F4.3	XLOC_048704	8:70579283-70582549	2.95344	1	1	7.74594	no	2.46106	1	1	5.50621	no	2.24854	1	1	4.75202	no	1.79662	1	1	3.47405	no
-	XLOC_047820	8:103773559-103776250	2.95038	1	1	7.72953	no	3.58277	1	1	11.9818	no	0.765739	1	1	1.70024	no	0.888414	1	1	1.85114	no
FER1L6	XLOC_047934	8:124864226-125183763	2.93391	1	1	7.64179	no	3.36914	1	1	10.3327	no	1.84821	1	1	3.60053	no	0.485022	1	1	1.39961	no
RP11-404P21.3	XLOC_015920	14:96671015-96735304	2.92431	1	1	7.59111	no	2.9202	1	1	7.56951	no	#N/A	#N/A	#N/A	#N/A	#N/A	#N/A	#N/A	#N/A	#N/A	#N/A
-	XLOC_049887	9:88744055-88744818	2.92419	1	1	7.59047	no	3.44763	0.22705	0.707421	10.9104	no	0.986201	1	1	1.98096	no	1.1632	1	1	2.23954	no
-	XLOC_042184	6:43690522-43737745	2.92374	1	1	7.58811	no	4.01597	0.2623	0.749184	16.1781	no	2.95524	1	1	7.75561	no	#N/A	#N/A	#N/A	#N/A	#N/A
RP4-599G15.3	XLOC_003865	1:120143779-120151873	2.92359	1	1	7.58732	no	2.78594	1	1	6.89686	no	0.489605	1	1	1.40406	no	3.84859	1	1	14.4059	no
AC123768.4	XLOC_017359	15:32898618-32932150	2.92348	1	1	7.58674	no	2.60559	1	1	6.0864	no	2.84291	1	1	7.17466	no	1.56772	1	1	2.96436	no
DCT	XLOC_013938	13:95091740-95131936	2.92161	1	1	7.57691	no	2.08264	1	1	4.23582	no	1.04514	1	1	2.06357	no	-0.193129	1	1	0.874707	no
GUCA1B	XLOC_043482	6:42152138-42162654	2.91956	1	1	7.56615	no	1.96916	1	1	3.9154	no	2.26443	1	1	4.80465	no	1.63384	1	1	3.10338	no
CELF4	XLOC_023813	18:34823009-35146000	2.91379	1	1	7.53595	no	3.75615	1	1	13.5118	no	#N/A	#N/A	#N/A	#N/A	#N/A	4.5287	1	1	23.0821	no
HYAL4	XLOC_045285	7:123454192-123517532	2.911	1	1	7.52139	no	2.98417	1	1	7.9127	no	0.126986	1	1	1.09201	no	#N/A	#N/A	#N/A	#N/A	#N/A
TENM1	XLOC_058711	X:123093082-124097666	2.90442	1	1	7.48717	no	3.54826	1	1	11.6986	no	-0.267049	1	1	0.831018	no	2.50107	1	1	5.66105	no
GOLGA8G	XLOC_017306	15:28764756-28778160	2.89865	1	1	7.45728	no	2.8063	1	1	6.99488	no	2.88027	1	1	7.36288	no	1.64193	1	1	3.12083	no
-	XLOC_007223	10:43138099-43139120	2.88795	1	1	7.40218	no	2.84463	1	1	7.18322	no	-0.0176003	1	1	0.987875	no	2.07367	1	1	4.20956	no
-	XLOC_048850	8:90616223-90616931	2.88651	1	1	7.39479	no	3.01027	1	1	8.05715	no	2.13231	1	1	4.38419	no	0.990687	1	1	1.98713	no
XXbac-B135H6.15	XLOC_032515	22:21311379-21318967	2.88633	1	1	7.39387	no	3.2469	0.22715	0.707588	9.49324	no	2.88007	1	1	7.36186	no	1.80302	1	1	3.4895	no
-	XLOC_043175	6:27371715-27372778	2.88444	1	1	7.38419	no	2.13734	1	1	4.3995	no	2.96124	1	1	7.78793	no	2.31177	1	1	4.96492	no
PTX3	XLOC_034667	3:156893011-157251422	2.88322	0.0155	0.183802	7.37795	no	3.58325	0.00555	0.0617362	11.9858	no	2.65293	0.0236	0.304545	6.28943	no	2.68836	0.02255	0.456415	6.4458	no
GZMM	XLOC_024079	19:544033-549919	2.8644	0.00625	0.0986028	7.28233	no	3.69389	0.0011	0.0167408	12.9411	yes	0.540204	1	1	1.45418	no	-0.731207	1	1	0.6024	no
CABP1	XLOC_011432	12:121067907-121105127	2.86038	1	1	7.26207	no	4.11633	1	1	17.3436	no	1.62104	1	1	3.07597	no	0.434402	1	1	1.35135	no
CACNA1I	XLOC_032890	22:39966757-40085742	2.85912	1	1	7.25573	no	4.73713	0.00025	0.00470905	26.6697	yes	-2.08061	1	1	0.236414	no	-0.987724	1	1	0.504273	no
TRAC,TRAJ23	XLOC_014289	14:22989393-23021083	2.84777	1	1	7.19887	no	3.10891	1	1	8.62731	no	1.30099	1	1	2.46398	no	1.45998	1	1	2.75105	no
CR2	XLOC_002210	1:207627574-207663240	2.84306	1	1	7.1754	no	1.85113	1	1	3.60783	no	1.52149	1	1	2.87087	no	1.6732	1	1	3.18921	no
-	XLOC_009742	11:76318468-76319377	2.83517	1	1	7.13627	no	3.97957	0.22645	0.706992	15.775	no	0.489921	1	1	1.40437	no	2.37947	1	1	5.20346	no
KCNK3	XLOC_026803	2:26915618-26956288	2.82616	1	1	7.09184	no	4.54113	1	1	23.2818	no	2.38905	1	1	5.23812	no	1.51044	1	1	2.84897	no
DPCR1	XLOC_041952	6:30908748-30922639	2.82498	1	1	7.08604	no	3.33771	1	1	10.11	no	-0.268474	1	1	0.830197	no	0.0789913	1	1	1.05628	no
SNTB1	XLOC_049078	8:121392999-121825513	2.82361	1	1	7.07932	no	2.04172	1	1	4.11736	no	#N/A	#N/A	#N/A	#N/A	#N/A	1.55361	1	1	2.93551	no
TEX14	XLOC_022634	17:56597197-56769416	2.81365	1	1	7.03061	no	2.05981	1	1	4.16931	no	2.77231	1	1	6.83201	no	0.939968	1	1	1.91849	no
MEFV	XLOC_019338	16:3292027-3306627	2.80611	1	1	6.99396	no	3.54209	1	1	11.6486	no	3.23938	1	1	9.44388	no	0.835949	1	1	1.78503	no
KRT23	XLOC_022303	17:39077681-39132178	2.80224	1	1	6.97523	no	2.45981	1	1	5.50144	no	2.19532	1	1	4.57991	no	1.28802	1	1	2.44193	no
-	XLOC_011367	12:114493891-114494595	2.79165	1	1	6.92421	no	2.63689	1	1	6.21989	no	2.59907	1	1	6.05896	no	1.88768	1	1	3.7004	no
ARMC4	XLOC_006376	10:28064114-28287979	2.7884	1	1	6.90863	no	1.04541	1	1	2.06395	no	2.99042	1	1	7.94705	no	1.85044	1	1	3.6061	no
KRT121P	XLOC_012121	12:52626303-52715182	2.78737	1	1	6.9037	no	1.82867	1	1	3.55209	no	2.31664	1	1	4.98171	no	1.18706	1	1	2.27688	no
RP11-661O13.1	XLOC_023590	18:8609442-8639379	2.77741	0.4357	0.954861	6.8562	no	1.4721	1	1	2.77425	no	1.42455	1	1	2.68431	no	1.8474	1	1	3.59851	no
-	XLOC_050441	9:140190598-140193202	2.77686	1	1	6.85359	no	2.78929	1	1	6.91289	no	2.89554	1	1	7.44122	no	2.57049	1	1	5.94011	no
-	XLOC_047644	8:79850711-79888109	2.77099	0.1905	0.74105	6.82576	no	1.49744	1	1	2.82341	no	0.616985	1	1	1.53367	no	-0.551854	1	1	0.682143	no
LINC00592	XLOC_010780	12:52599367-52617564	2.77066	0.03275	0.29968	6.8242	no	3.85835	0.0815	0.420961	14.5037	no	-1.16062	1	1	0.44732	no	1.37174	1	1	2.58782	no
SPTSSB	XLOC_036104	3:161062579-161090668	2.76665	0.0064	0.100313	6.80526	no	2.80212	0.0035	0.0427576	6.97465	yes	0.867206	1	1	1.82413	no	-0.766267	1	1	0.587937	no
USP41	XLOC_033111	22:20692437-20745048	2.76573	1	1	6.80092	no	#N/A	#N/A	#N/A	#N/A	#N/A	#N/A	#N/A	#N/A	#N/A	#N/A	-0.155139	1	1	0.898046	no
MUC6	XLOC_008773	11:1012820-1036706	2.75916	1	1	6.77002	no	6.11321	1	1	69.2245	no	-0.0255264	1	1	0.982462	no	1.15381	1	1	2.22501	no
-	XLOC_045680	7:572985-574473	2.75819	1	1	6.76547	no	3.98114	1	1	15.7922	no	-0.0207284	1	1	0.985735	no	-0.0238522	1	1	0.983603	no
-	XLOC_049115	8:125837342-125842376	2.75809	1	1	6.765	no	3.73071	1	1	13.2756	no	2.52482	1	1	5.75502	no	2.15806	1	1	4.46314	no
-	XLOC_031978	21:45585706-45586641	2.75741	1	1	6.76181	no	3.1497	1	1	8.87471	no	#N/A	#N/A	#N/A	#N/A	#N/A	#N/A	#N/A	#N/A	#N/A	#N/A
TMEM176B	XLOC_046925	7:150488372-150502208	2.75701	1	1	6.75994	no	5.45858	0.20835	0.685462	43.974	no	#N/A	#N/A	#N/A	#N/A	#N/A	#N/A	#N/A	#N/A	#N/A	#N/A
RP11-537H15.3	XLOC_049523	9:34084329-34127397	2.75013	1	1	6.72778	no	2.86239	1	1	7.27219	no	1.76515	1	1	3.39909	no	2.47301	1	1	5.55201	no
-	XLOC_021969	17:20352707-20603227	2.74878	0.4001	0.938128	6.72148	no	1.92442	0.5844	0.969467	3.79584	no	2.52918	0.5158	0.957796	5.77243	no	1.54217	1	1	2.91232	no
RPL4P3	XLOC_004379	1:171652267-171653578	2.747	1	1	6.7132	no	0.463617	1	1	1.37899	no	1.22574	1	1	2.33875	no	2.386	1	1	5.22706	no
-	XLOC_037436	4:154629680-154630848	2.74387	1	1	6.69865	no	3.29138	1	1	9.79048	no	0.224458	1	1	1.16834	no	0.901548	1	1	1.86807	no
SH3GL3	XLOC_017008	15:84115979-84287495	2.74086	1	1	6.68469	no	3.36821	0.19785	0.672423	10.326	no	0.834589	1	1	1.78335	no	0.658846	1	1	1.57882	no
-	XLOC_035072	3:13553582-13555887	2.73921	1	1	6.67705	no	2.94519	0.05065	0.309877	7.70177	no	-0.157114	1	1	0.896817	no	-2.22154	1	1	0.214412	no
AC116614.1	XLOC_028530	2:945319-945960	2.73889	0.2555	0.810952	6.67557	no	1.0333	1	1	2.0467	no	0.694372	1	1	1.61818	no	1.29146	1	1	2.44776	no
CXCL9	XLOC_038159	4:76831808-76928641	2.72876	1	1	6.62886	no	2.43767	1	1	5.41766	no	#N/A	#N/A	#N/A	#N/A	#N/A	1.55288	1	1	2.93402	no
PTN	XLOC_046776	7:136912087-137028611	2.72149	1	1	6.59554	no	3.05771	1	1	8.3265	no	1.28445	1	1	2.43589	no	1.31468	1	1	2.48747	no
TREM1	XLOC_043467	6:41235663-41254457	2.72084	1	1	6.59257	no	4.20172	0.1953	0.668707	18.4011	no	2.55655	1	1	5.88299	no	-2.10864	1	1	0.231865	no
AC092835.2	XLOC_027355	2:95873282-95881351	2.71955	1	1	6.58667	no	3.07657	1	1	8.43606	no	2.54823	1	1	5.84916	no	2.20239	1	1	4.60241	no
CTC-338M12.6	XLOC_040213	5:180618923-180633120	2.7165	0.04035	0.342975	6.57276	no	1.93653	1	1	3.82784	no	3.08872	0.01655	0.250792	8.50741	no	1.8563	1	1	3.62078	no
RP11-442J21.1	XLOC_013716	13:45225947-45289894	2.70795	0.1432	0.659139	6.53393	no	4.04015	0.1479	0.584077	16.4515	no	#N/A	#N/A	#N/A	#N/A	#N/A	-0.00929305	1	1	0.993579	no
AC068282.3	XLOC_027641	2:128146705-128158156	2.70724	1	1	6.53071	no	2.61131	1	1	6.11058	no	1.11935	1	1	2.17249	no	-1.0287	1	1	0.490152	no
TBC1D29	XLOC_020784	17:28880714-28890511	2.70003	1	1	6.49815	no	0.865633	1	1	1.82214	no	#N/A	#N/A	#N/A	#N/A	#N/A	-1.36734	1	1	0.387605	no
AL591069.1	XLOC_042895	6:160769299-160932156	2.69648	1	1	6.48218	no	1.95569	1	1	3.87901	no	2.12422	1	1	4.35967	no	1.56354	1	1	2.95578	no
RP5-991G20.1	XLOC_019029	16:72699068-73093597	2.69412	0.46235	0.965334	6.47159	no	1.02436	1	1	2.03406	no	2.33715	1	1	5.05303	no	1.78429	1	1	3.44449	no
C9orf152	XLOC_051262	9:112952327-112970469	2.6919	1	1	6.46164	no	0.715084	1	1	1.64158	no	1.91476	1	1	3.77051	no	1.55621	1	1	2.9408	no
AC093642.3,AC131097.3	XLOC_028516	2:242823513-243026289	2.69051	1	1	6.45542	no	2.90067	1	1	7.46773	no	1.9539	1	1	3.8742	no	2.17008	1	1	4.50048	no
CTB-25B13.6	XLOC_024123	19:1481426-1490751	2.68508	0.4046	0.9385	6.43116	no	#N/A	#N/A	#N/A	#N/A	#N/A	0.956733	1	1	1.94091	no	-0.305287	1	1	0.809281	no
-	XLOC_028552	2:3618803-3622374	2.68346	1	1	6.42395	no	1.04391	1	1	2.06181	no	2.21448	1	1	4.64114	no	2.8447	1	1	7.18357	no
CNBD2	XLOC_030748	20:34556511-34618622	2.68196	1	1	6.41727	no	3.32266	1	1	10.0051	no	3.56509	1	1	11.8358	no	3.34777	1	1	10.1807	no
SEMA3G	XLOC_035419	3:52467068-52479104	2.68173	1	1	6.41625	no	3.30821	1	1	9.90536	no	0.283964	1	1	1.21754	no	0.324367	1	1	1.25211	no
-	XLOC_020642	17:20313282-20314938	2.67721	1	1	6.39618	no	2.20664	1	1	4.61599	no	2.64819	1	1	6.2688	no	0.318801	1	1	1.24729	no
-	XLOC_005670	10:76472996-76473597	2.67396	1	1	6.38178	no	1.19897	1	1	2.29576	no	-0.299277	1	1	0.81266	no	1.29531	1	1	2.4543	no
GDPD2	XLOC_057233	X:69642880-69653240	2.67346	1	1	6.37957	no	2.64944	0.0008	0.0128126	6.27424	yes	0.672283	1	1	1.59359	no	0.579934	1	1	1.49478	no
FGF19	XLOC_009616	11:69512999-69519410	2.67321	0.0113	0.148346	6.37847	no	3.57789	0.00145	0.020962	11.9413	yes	2.53843	1	1	5.80956	no	1.08484	1	1	2.12114	no
ZNF157	XLOC_057005	X:47229981-47273704	2.66997	1	1	6.36416	no	2.98837	1	1	7.93577	no	3.0373	1	1	8.20953	no	-0.273474	1	1	0.827325	no
-	XLOC_015970	14:101930877-101932704	2.6682	1	1	6.35636	no	0.279807	1	1	1.21403	no	1.6617	1	1	3.16389	no	1.95891	1	1	3.88768	no
-	XLOC_045353	7:129420238-129420808	2.66353	1	1	6.33581	no	-0.237927	1	1	0.847963	no	1.76831	1	1	3.40655	no	#N/A	#N/A	#N/A	#N/A	#N/A
COL2A1	XLOC_012025	12:48366747-48398269	2.65718	0.00255	0.0518859	6.30799	no	3.8241	5e-05	0.00116756	14.1634	yes	-0.34636	1	1	0.786566	no	-0.754123	1	1	0.592907	no
SPNS3	XLOC_020360	17:4336982-4391503	2.65667	1	1	6.30576	no	3.04801	0.0099	0.0949345	8.2707	no	0.287252	1	1	1.22031	no	#N/A	#N/A	#N/A	#N/A	#N/A
RP11-553L6.5	XLOC_035722	3:114033347-114035026	2.6549	1	1	6.29803	no	1.84027	1	1	3.58077	no	0.481768	1	1	1.39645	no	-0.0251356	1	1	0.982728	no
RP11-707G14.6	XLOC_009687	11:73583711-73638790	2.65424	1	1	6.29515	no	1.59918	1	1	3.02971	no	1.47981	1	1	2.78912	no	2.2397	1	1	4.72299	no
-	XLOC_027230	2:85154413-85194456	2.64839	1	1	6.26967	no	1.69763	1	1	3.24368	no	1.29156	1	1	2.44793	no	2.24125	1	1	4.72807	no
KIRREL2	XLOC_024759	19:36316865-36370695	2.64633	0.0035	0.0661889	6.26073	no	2.74838	0.01115	0.103861	6.71962	no	-1.73664	1	1	0.300068	no	-1.24696	1	1	0.421335	no
RAD9B	XLOC_011323	12:110928901-111021155	2.63963	1	1	6.23172	no	0.888297	1	1	1.85099	no	1.63534	1	1	3.10661	no	1.90429	1	1	3.74325	no
FAM201B	XLOC_027716	2:133110239-133112412	2.63646	1	1	6.21804	no	1.60601	1	1	3.04409	no	2.11942	1	1	4.34519	no	#N/A	#N/A	#N/A	#N/A	#N/A
GPR116	XLOC_043540	6:46820248-46922680	2.6295	1	1	6.18811	no	2.96389	1	1	7.80225	no	#N/A	#N/A	#N/A	#N/A	#N/A	-1.13572	1	1	0.455108	no
Z83851.1	XLOC_033451	22:42760405-42765242	2.62899	0.0209	0.224137	6.18593	no	3.78711	0.00395	0.0472363	13.8049	yes	1.69522	1	1	3.23826	no	2.08897	1	1	4.25444	no
-	XLOC_034242	3:105897356-105913168	2.62763	1	1	6.1801	no	2.81912	0.2061	0.682092	7.05732	no	0.697311	1	1	1.62148	no	1.40779	1	1	2.6533	no
-	XLOC_043483	6:42166250-42167564	2.62732	1	1	6.17877	no	2.63705	1	1	6.22058	no	3.55501	1	1	11.7534	no	1.43082	1	1	2.696	no
FBXL13	XLOC_046545	7:102453307-102715286	2.62331	1	1	6.16162	no	1.92501	1	1	3.79739	no	0.615016	1	1	1.53157	no	2.66417	1	1	6.33863	no
NKD2	XLOC_038904	5:1008943-1039058	2.62167	1	1	6.15462	no	3.77801	0.00085	0.0134723	13.7181	yes	2.83756	1	1	7.1481	no	-0.152665	1	1	0.899587	no
RP4-758J18.9	XLOC_000049	1:1363501-1365635	2.61764	1	1	6.13745	no	3.82067	0.14805	0.584217	14.1298	no	0.221681	1	1	1.16609	no	0.719462	1	1	1.64657	no
SELENBP1	XLOC_004044	1:151336777-151345209	2.61525	1	1	6.12729	no	4.19554	1	1	18.3224	no	-0.0211967	1	1	0.985415	no	#N/A	#N/A	#N/A	#N/A	#N/A
SLC18A3	XLOC_005475	10:50817140-50918307	2.61466	1	1	6.12479	no	1.73147	1	1	3.32066	no	1.74939	1	1	3.36216	no	2.31874	1	1	4.98896	no
-	XLOC_032855	22:38198487-38199011	2.61373	1	1	6.12084	no	2.07515	1	1	4.21388	no	3.14066	0.2492	0.813622	8.81927	no	2.70142	1	1	6.50442	no
CTD-2224J9.7	XLOC_026479	19:53868945-53930574	2.6137	1	1	6.12071	no	0.973919	1	1	1.96417	no	0.99735	1	1	1.99633	no	#N/A	#N/A	#N/A	#N/A	#N/A
Z69720.2	XLOC_018144	16:127005-188859	2.61277	0.41595	0.94254	6.11677	no	0.18518	1	1	1.13696	no	-0.313484	1	1	0.804696	no	1.59662	1	1	3.02434	no
TEPP	XLOC_018874	16:58010338-58022020	2.6115	1	1	6.11139	no	2.21091	1	1	4.62967	no	-0.65664	1	1	0.634354	no	0.0349431	1	1	1.02452	no
-	XLOC_046313	7:75792251-75793732	2.61062	0.0864	0.522117	6.10766	no	2.91466	0.0575	0.338125	7.5405	no	0.496189	1	1	1.41048	no	-0.420554	1	1	0.747138	no
CX3CL1	XLOC_018862	16:57406369-57418960	2.6057	1	1	6.08687	no	3.66441	1	1	12.6794	no	2.35868	1	1	5.12901	no	-0.0262951	1	1	0.981939	no
ZMYND10	XLOC_035388	3:50378536-50384283	2.60237	1	1	6.07283	no	4.37146	5e-05	0.00116756	20.6986	yes	1.51578	1	1	2.85953	no	0.58276	1	1	1.49771	no
ZNF542	XLOC_025320	19:56732620-56904914	2.59949	1	1	6.06072	no	0.756217	1	1	1.68906	no	0.316741	1	1	1.24551	no	-0.186882	1	1	0.878502	no
C1orf127	XLOC_002757	1:11006527-11042094	2.59494	1	1	6.04164	no	3.77613	1	1	13.7002	no	1.25055	1	1	2.37932	no	3.97136	1	1	15.6855	no
RP11-462P6.1	XLOC_017410	15:39157522-39719396	2.58707	1	1	6.00877	no	#N/A	#N/A	#N/A	#N/A	#N/A	#N/A	#N/A	#N/A	#N/A	#N/A	#N/A	#N/A	#N/A	#N/A	#N/A
LDB3,OPN4	XLOC_005751	10:88414313-88495974	2.58351	1	1	5.99396	no	4.93282	5e-05	0.00116756	30.5441	yes	-1.12999	1	1	0.456919	no	-2.15618	1	1	0.22435	no
AGTR1	XLOC_034589	3:148415570-148460795	2.58339	1	1	5.99346	no	0.414535	1	1	1.33287	no	2.14785	1	1	4.43167	no	0.100299	1	1	1.072	no
PAH	XLOC_012586	12:103230662-103354294	2.5807	1	1	5.9823	no	-0.784003	1	1	0.580753	no	1.48798	1	1	2.80496	no	#N/A	#N/A	#N/A	#N/A	#N/A
AP001055.6	XLOC_032359	21:45578622-45579959	2.57862	1	1	5.97368	no	2.54474	1	1	5.83503	no	2.65997	1	1	6.3202	no	#N/A	#N/A	#N/A	#N/A	#N/A
PRDM12	XLOC_050313	9:133539980-133558368	2.57751	1	1	5.96909	no	0.705516	1	1	1.63073	no	0.230273	1	1	1.17306	no	-0.273194	1	1	0.827486	no
KIAA0226L	XLOC_013738	13:46916138-47012325	2.57237	1	1	5.94786	no	4.45726	1	1	21.9669	no	3.04607	1	1	8.25959	no	3.34154	1	1	10.1369	no
CPA2	XLOC_045361	7:129906666-129929638	2.57129	1	1	5.94341	no	0.902538	1	1	1.86935	no	-0.277817	1	1	0.824838	no	0.0649485	1	1	1.04605	no
-	XLOC_041693	6:13780653-13781164	2.56148	1	1	5.90313	no	2.33158	1	1	5.03356	no	3.71057	0.2449	0.809439	13.0916	no	3.95765	0.2436	0.999777	15.5372	no
KRT86	XLOC_010783	12:52626303-52715182	2.55846	1	1	5.89079	no	2.70161	1	1	6.50527	no	1.70998	1	1	3.27156	no	1.9057	1	1	3.74691	no
-	XLOC_004929	1:234746024-234746608	2.55475	0.0348	0.312121	5.87566	no	2.01211	0.1352	0.557983	4.03372	no	2.1159	1	1	4.3346	no	2.40092	0.14535	0.925829	5.2814	no
-	XLOC_008124	11:69061604-69187279	2.54949	1	1	5.85427	no	3.70406	0.3594	0.846809	13.0327	no	0.701553	1	1	1.62625	no	-0.289152	1	1	0.818383	no
RP11-101P17.11	XLOC_013526	13:21834167-21868998	2.54883	1	1	5.8516	no	2.40611	1	1	5.30043	no	0.537768	1	1	1.45172	no	-0.427234	1	1	0.743686	no
GFRA1	XLOC_007074	10:117816443-118033126	2.54793	1	1	5.84795	no	0.280754	1	1	1.21483	no	-1.93056	1	1	0.262327	no	#N/A	#N/A	#N/A	#N/A	#N/A
ADAMTS3	XLOC_038127	4:73146685-73434516	2.54742	1	1	5.84588	no	2.42951	1	1	5.3871	no	1.00974	1	1	2.01355	no	0.799693	1	1	1.74073	no
SYNGR4	XLOC_025027	19:48867651-48879633	2.54631	1	1	5.84138	no	4.78214	0.23165	0.713038	27.5149	no	2.61117	1	1	6.10999	no	#N/A	#N/A	#N/A	#N/A	#N/A
CTD-2659N19.2	XLOC_024379	19:12798866-12807457	2.54419	0.4754	0.969224	5.83281	no	1.67068	0.5583	0.961275	3.18365	no	3.60066	0.4507	0.94196	12.1313	no	2.20514	0.5042	0.999777	4.61119	no
ACTG2	XLOC_027158	2:74119440-74146992	2.54379	1	1	5.83119	no	2.46255	1	1	5.5119	no	2.67116	1	1	6.36941	no	2.21666	1	1	4.64816	no
TECTA	XLOC_008598	11:120971881-121062202	2.54239	1	1	5.82553	no	3.5833	1	1	11.9862	no	1.15717	1	1	2.2302	no	2.05999	1	1	4.16983	no
POF1B	XLOC_058475	X:84532401-84634748	2.53865	1	1	5.81045	no	3.31683	0.0009	0.0140464	9.96473	yes	1.23631	1	1	2.35595	no	0.616498	1	1	1.53315	no
RP11-465N4.4	XLOC_004585	1:201951499-201986316	2.53636	0.2312	0.789233	5.80123	no	2.47827	0.19985	0.675515	5.57229	no	1.11453	1	1	2.16524	no	1.08843	1	1	2.12643	no
CD79A	XLOC_024899	19:42381189-42385439	2.53188	1	1	5.78325	no	2.2877	1	1	4.88277	no	#N/A	#N/A	#N/A	#N/A	#N/A	#N/A	#N/A	#N/A	#N/A	#N/A
AC061992.2	XLOC_021506	17:76311809-76343879	2.52929	0.01955	0.21508	5.77288	no	2.88148	0.0104	0.0985551	7.36906	no	0.969291	1	1	1.95788	no	0.0285031	1	1	1.01995	no
-	XLOC_039817	5:138889465-138890897	2.5289	1	1	5.77131	no	3.03383	1	1	8.18981	no	1.2533	1	1	2.38386	no	-1.0234	1	1	0.491956	no
IGFL3	XLOC_026272	19:46604379-46718160	2.52712	0.1557	0.685696	5.7642	no	2.11891	0.20125	0.677403	4.34366	no	1.11756	0.4594	0.945242	2.1698	no	0.47131	0.76235	0.999777	1.38637	no
RP11-66B24.4	XLOC_017185	15:101389765-101626271	2.52691	0.33375	0.891829	5.76336	no	0.366682	0.85485	0.996063	1.28938	no	1.23386	0.56805	0.972555	2.35195	no	1.36722	0.58275	0.999777	2.57973	no
RSPH4A	XLOC_042614	6:116937641-116954148	2.51393	1	1	5.71174	no	5.34976	0.2303	0.711029	40.7792	no	#N/A	#N/A	#N/A	#N/A	#N/A	0.0745799	1	1	1.05305	no
CTB-176F20.3	XLOC_024625	19:23487792-23578362	2.51266	1	1	5.70671	no	1.99209	1	1	3.97813	no	0.731431	1	1	1.66029	no	0.0788478	1	1	1.05617	no
SEMA3E	XLOC_046357	7:82993221-83278429	2.51213	0.01015	0.138528	5.70462	no	2.21373	0.0147	0.127748	4.63873	no	0.675753	1	1	1.59743	no	0.775336	1	1	1.71159	no
AC006116.20	XLOC_025318	19:56732620-56904914	2.51197	1	1	5.70398	no	1.44519	1	1	2.72299	no	1.09976	1	1	2.14319	no	-1.03735	1	1	0.487222	no
RP3-416H24.1	XLOC_012120	12:52626303-52715182	2.50642	1	1	5.68208	no	2.5824	0.4859	0.933275	5.98935	no	1.19401	1	1	2.28788	no	0.512559	1	1	1.42658	no
RP13-942N8.1	XLOC_011473	12:123849499-123850660	2.5058	1	1	5.67964	no	2.40392	1	1	5.29239	no	2.30836	1	1	4.9532	no	0.988846	1	1	1.9846	no
Y_RNA	XLOC_012054	12:49297200-49351334	2.50422	0.3285	0.885292	5.67343	no	0.0428243	0.974	0.997058	1.03013	no	-0.603672	0.75455	0.994059	0.658077	no	-1.41921	0.46805	0.999777	0.373917	no
CCNYL2	XLOC_006477	10:42903615-42970797	2.49774	1	1	5.648	no	-0.114349	1	1	0.923799	no	2.36943	1	1	5.16737	no	#N/A	#N/A	#N/A	#N/A	#N/A
KIAA0319	XLOC_043122	6:24544331-24646383	2.49675	1	1	5.64413	no	4.30612	1	1	19.782	no	#N/A	#N/A	#N/A	#N/A	#N/A	0.318705	1	1	1.24721	no
MGC20647	XLOC_032751	22:30635182-30642907	2.49612	0.4712	0.968366	5.64166	no	2.91919	0.4201	0.890689	7.56421	no	1.06444	0.67875	0.99382	2.09136	no	1.24227	0.6594	0.999777	2.3657	no
GRIA4	XLOC_008442	11:105480720-105852819	2.49489	1	1	5.63685	no	-0.398233	1	1	0.758787	no	#N/A	#N/A	#N/A	#N/A	#N/A	-0.895706	1	1	0.537484	no
ACSM4	XLOC_011667	12:7456879-7481320	2.4928	1	1	5.62869	no	3.96146	0.01735	0.144222	15.5782	no	-0.305165	1	1	0.80935	no	-0.699254	1	1	0.615891	no
SEMA5A	XLOC_040299	5:9001885-9546187	2.48973	1	1	5.61673	no	2.20439	1	1	4.6088	no	2.56025	1	1	5.8981	no	1.9098	1	1	3.75757	no
RP1-179N16.6	XLOC_043416	6:36114474-36200567	2.48499	1	1	5.5983	no	3.00256	1	1	8.01421	no	2.52592	1	1	5.75941	no	2.56357	1	1	5.91169	no
NLGN4X	XLOC_057920	X:5758677-6146904	2.4847	1	1	5.59718	no	1.98279	1	1	3.95257	no	1.74709	1	1	3.35681	no	-0.204028	1	1	0.868123	no
DEGS2	XLOC_015949	14:100612669-100633034	2.4831	0.0148	0.179473	5.59098	no	3.04043	0.0054	0.0603309	8.22736	no	0.717285	1	1	1.64409	no	0.497396	1	1	1.41166	no
HSD3BP5	XLOC_003866	1:120143779-120151873	2.48167	0.2741	0.830603	5.58544	no	-0.625493	1	1	0.648198	no	0.173361	1	1	1.12768	no	0.576551	1	1	1.49128	no
-	XLOC_004180	1:156608135-156609973	2.48133	1	1	5.58412	no	3.77243	0.0924	0.454524	13.6652	no	0.119613	1	1	1.08644	no	-1.15566	1	1	0.448861	no
MAATS1	XLOC_034329	3:119421868-119485949	2.47825	1	1	5.57221	no	4.00385	1	1	16.0428	no	0.0939837	1	1	1.06731	no	-0.559602	1	1	0.678489	no
CHST8	XLOC_024704	19:34112860-34264413	2.47289	1	1	5.55155	no	2.22141	1	1	4.66349	no	#N/A	#N/A	#N/A	#N/A	#N/A	0.182187	1	1	1.1346	no
NEUROD2	XLOC_022273	17:37759788-37779400	2.46915	1	1	5.53717	no	3.02739	1	1	8.15333	no	2.99627	1	1	7.97934	no	2.68548	1	1	6.43295	no
RP11-214C8.2	XLOC_022713	17:62073430-62097994	2.46893	1	1	5.53633	no	2.87667	1	1	7.34453	no	#N/A	#N/A	#N/A	#N/A	#N/A	#N/A	#N/A	#N/A	#N/A	#N/A
RP11-434D2.6	XLOC_021968	17:20352707-20603227	2.46504	1	1	5.52142	no	3.23923	0.2665	0.753999	9.4429	no	1.98606	1	1	3.96154	no	0.677409	1	1	1.59926	no
ENTPD8	XLOC_051595	9:140317801-140336268	2.46119	0.01585	0.186273	5.50671	no	3.30753	0.005	0.0570709	9.9007	no	-1.61182	1	1	0.327185	no	-1.68964	1	1	0.310004	no
CTD-2128A3.1	XLOC_014818	14:85828800-85983278	2.45905	0.26125	0.818429	5.49855	no	1.87398	1	1	3.66542	no	2.85017	0.47815	0.950492	7.21085	no	0.0277569	1	1	1.01943	no
-	XLOC_045681	7:575032-577124	2.45856	1	1	5.49668	no	2.50914	1	1	5.69281	no	0.495557	1	1	1.40986	no	-2.09284	1	1	0.234419	no
RP11-420G6.4	XLOC_042977	6:2854890-2876744	2.45806	1	1	5.49477	no	2.34263	1	1	5.07226	no	1.64167	1	1	3.12027	no	#N/A	#N/A	#N/A	#N/A	#N/A
KCNG2	XLOC_023507	18:77623667-77660184	2.45777	1	1	5.49367	no	1.21601	1	1	2.32303	no	1.33211	1	1	2.51771	no	1.07578	1	1	2.10786	no
-	XLOC_042732	6:138742584-138743116	2.4564	1	1	5.48845	no	2.74994	0.2336	0.715441	6.72689	no	1.99406	1	1	3.98356	no	3.12955	0.2471	0.999777	8.75162	no
-	XLOC_009587	11:67612730-67613336	2.456	1	1	5.48693	no	2.9114	1	1	7.52348	no	1.99066	1	1	3.97419	no	#N/A	#N/A	#N/A	#N/A	#N/A
RP11-556K13.1	XLOC_003699	1:102251891-102254059	2.45485	1	1	5.48256	no	1.47965	1	1	2.78881	no	1.57011	1	1	2.96927	no	2.80092	1	1	6.96885	no
AKAP5	XLOC_014658	14:64854748-65009955	2.45482	1	1	5.48245	no	2.08946	1	1	4.25589	no	2.00188	1	1	4.00522	no	2.06891	1	1	4.1957	no
CTD-3247F14.2	XLOC_048340	8:22536525-22541522	2.45454	1	1	5.48138	no	3.20754	1	1	9.23774	no	0.476328	1	1	1.3912	no	#N/A	#N/A	#N/A	#N/A	#N/A
IZUMO4	XLOC_024139	19:2071036-2099592	2.4445	0.0042	0.075668	5.44337	no	2.27836	0.00805	0.0814856	4.85126	no	1.03991	0.17385	0.739354	2.0561	no	-0.757241	0.33655	0.999777	0.591627	no
MAFA	XLOC_049238	8:144501351-144512576	2.44317	0.0031	0.060605	5.43835	no	3.68335	5e-05	0.00116756	12.8469	yes	-0.0702784	1	1	0.952454	no	-1.23421	1	1	0.425075	no
UNC5A	XLOC_040137	5:176237477-176326333	2.43742	1	1	5.41672	no	4.81911	5e-05	0.00116756	28.2291	yes	-1.05295	1	1	0.481982	no	-0.396771	1	1	0.759556	no
SNORA2	XLOC_042793	6:149913814-149970108	2.4367	0.50265	0.980296	5.41402	no	1.13931	0.59915	0.973647	2.20276	no	1.25422	1	1	2.38538	no	2.68131	0.45855	0.999777	6.41438	no
ADAMTS2	XLOC_041539	5:178537851-178772431	2.42988	1	1	5.38849	no	4.82746	0.23195	0.713244	28.3929	no	-3.08145	1	1	0.118138	no	-0.92845	1	1	0.525423	no
RP11-173C20.1	XLOC_011504	12:127210815-127256986	2.42913	1	1	5.38569	no	2.28184	1	1	4.86298	no	1.34328	1	1	2.53728	no	0.621927	1	1	1.53893	no
ZMAT1	XLOC_058548	X:101137261-101187004	2.42515	1	1	5.37085	no	0.47616	1	1	1.39104	no	1.90126	1	1	3.73539	no	0.458248	1	1	1.37387	no
MAT1A	XLOC_006812	10:82031575-82049440	2.42418	1	1	5.36724	no	2.71278	1	1	6.55584	no	0.619785	1	1	1.53665	no	-0.184345	1	1	0.880049	no
AKR7L	XLOC_002876	1:19592477-19600688	2.41648	1	1	5.33867	no	2.52513	1	1	5.75625	no	1.75087	1	1	3.36561	no	2.84251	1	1	7.17267	no
-	XLOC_017217	15:20851198-20851765	2.40674	0.0373	0.324681	5.30275	no	2.33892	0.1094	0.494466	5.05924	no	1.38611	1	1	2.61373	no	2.1313	0.16595	0.952606	4.38112	no
RP11-258C19.5	XLOC_057129	X:53122891-53171889	2.4062	1	1	5.30076	no	2.8583	1	1	7.2516	no	1.48718	1	1	2.8034	no	2.85277	1	1	7.22386	no
RP11-262H14.3	XLOC_050889	9:66513031-66555928	2.40496	1	1	5.29621	no	2.11794	1	1	4.34074	no	-0.277051	1	1	0.825276	no	1.06634	1	1	2.09411	no
PCP2	XLOC_025577	19:7694622-7712759	2.40363	1	1	5.29133	no	1.89519	1	1	3.71971	no	2.83187	1	1	7.11996	no	0.72224	1	1	1.64974	no
RP11-262H14.4	XLOC_049730	9:66513031-66555928	2.40277	0.0478	0.377881	5.28818	no	1.58748	0.1704	0.627714	3.00524	no	1.27571	0.1741	0.740109	2.42118	no	1.78118	0.179	0.974991	3.43707	no
CXorf28	XLOC_056732	X:3189860-3202694	2.40227	1	1	5.28634	no	0.144167	1	1	1.10509	no	-0.0116051	1	1	0.991988	no	#N/A	#N/A	#N/A	#N/A	#N/A
PSAPL1	XLOC_037758	4:7194264-7744554	2.39925	1	1	5.27529	no	4.39113	0.1312	0.54843	20.9827	no	-0.25271	1	1	0.839318	no	-0.845615	1	1	0.556474	no
GJA3	XLOC_013506	13:20712393-20735188	2.3969	1	1	5.2667	no	2.57324	1	1	5.95145	no	0.532596	1	1	1.44653	no	0.094985	1	1	1.06805	no
IPCEF1	XLOC_044193	6:154331630-154677926	2.39551	1	1	5.26163	no	3.2624	1	1	9.59578	no	3.42971	1	1	10.7757	no	3.48138	1	1	11.1686	no
NAT16	XLOC_046512	7:100813773-100823557	2.39475	1	1	5.25886	no	2.51935	1	1	5.73324	no	1.1698	1	1	2.24981	no	-0.780717	1	1	0.582077	no
PKNOX2	XLOC_008656	11:125034582-125303315	2.39301	1	1	5.25252	no	4.35875	5e-05	0.00116756	20.517	yes	1.59839	1	1	3.02805	no	1.54547	1	1	2.91899	no
SPOCK2	XLOC_006715	10:73818792-73848790	2.39203	1	1	5.24895	no	2.12783	1	1	4.3706	no	-0.939791	1	1	0.521308	no	0.0549274	1	1	1.03881	no
CTD-2001E22.2	XLOC_038960	5:9546311-9550721	2.39171	1	1	5.24779	no	1.73879	1	1	3.33755	no	1.15653	1	1	2.22921	no	0.742969	1	1	1.67362	no
HAPLN2	XLOC_001665	1:156589085-156595517	2.38907	1	1	5.2382	no	1.87467	1	1	3.66718	no	-0.282733	1	1	0.822032	no	-0.279677	1	1	0.823775	no
RP11-761E20.1	XLOC_058642	X:115005740-115085456	2.38584	1	1	5.22648	no	2.28154	1	1	4.86197	no	1.97203	1	1	3.9232	no	1.61932	1	1	3.0723	no
LOXHD1	XLOC_023839	18:44056934-44236996	2.38417	1	1	5.22043	no	3.75711	1	1	13.5208	no	1.78725	1	1	3.45156	no	-0.52696	1	1	0.694016	no
REN	XLOC_004623	1:204123943-204135465	2.38294	1	1	5.21599	no	3.10115	0.24535	0.729388	8.58103	no	-0.485316	1	1	0.714341	no	0.422892	1	1	1.34061	no
C1orf68	XLOC_001562	1:152691081-152692948	2.37824	0.01515	0.181436	5.19902	no	2.59284	0.0062	0.0669696	6.03285	no	0.387383	1	1	1.30802	no	-0.561076	1	1	0.677796	no
SAMD11	XLOC_000026	1:860259-894767	2.37435	0.02795	0.27156	5.18502	no	2.48173	0.02725	0.201737	5.58567	no	0.669656	0.5246	0.962343	1.59069	no	0.167598	0.88055	0.999777	1.12319	no
RGMA	XLOC_018057	15:93586635-93632433	2.37252	1	1	5.17845	no	3.17495	0.0001	0.00213617	9.0314	yes	1.1978	1	1	2.2939	no	-0.0817992	1	1	0.944879	no
SPNS2	XLOC_020361	17:4400688-4458926	2.36982	0.0103	0.139392	5.16877	no	2.56791	0.00515	0.0584342	5.9295	no	0.151319	0.8613	0.994059	1.11058	no	-1.06999	0.24735	0.999777	0.476322	no
POU3F1	XLOC_003148	1:38509522-38512450	2.36418	1	1	5.1486	no	4.27056	1	1	19.3004	no	2.83949	1	1	7.15767	no	1.49309	1	1	2.81491	no
DDIT4L	XLOC_038315	4:100869242-101136662	2.35952	0.18165	0.728563	5.132	no	2.3331	0.24125	0.72579	5.03887	no	1.37113	1	1	2.58673	no	1.45638	1	1	2.74419	no
SERPINF2	XLOC_020314	17:1646129-1658562	2.3509	1	1	5.10142	no	3.31792	0.0002	0.00389186	9.97226	yes	-0.311831	1	1	0.805619	no	0.106079	1	1	1.0763	no
C16orf71	XLOC_018293	16:4746512-4817625	2.34988	1	1	5.09782	no	0.386562	1	1	1.30727	no	-1.43993	1	1	0.368585	no	-0.604996	1	1	0.657473	no
SULT1A2	XLOC_019620	16:28603263-28608430	2.34793	1	1	5.09093	no	3.07089	0.0059	0.0647349	8.40292	no	0.178902	1	1	1.13202	no	#N/A	#N/A	#N/A	#N/A	#N/A
AC009950.2	XLOC_028374	2:230990025-231273006	2.34783	0.0782	0.492393	5.09058	no	2.38302	0.0742	0.398486	5.21628	no	1.64889	0.1967	0.76927	3.13592	no	0.352671	1	1	1.27692	no
IGFBP5	XLOC_030178	2:217536827-217858722	2.34761	1	1	5.0898	no	3.18201	0.01955	0.157959	9.07571	no	1.62323	1	1	3.08064	no	0.615544	1	1	1.53214	no
RP11-259O2.1	XLOC_038915	5:1933976-1959290	2.34761	1	1	5.0898	no	3.39369	0.2574	0.745067	10.51	no	#N/A	#N/A	#N/A	#N/A	#N/A	#N/A	#N/A	#N/A	#N/A	#N/A
RP11-23F23.2	XLOC_007324	11:4208369-4223885	2.34715	1	1	5.08818	no	0.156522	1	1	1.1146	no	2.14579	1	1	4.42535	no	#N/A	#N/A	#N/A	#N/A	#N/A
IKZF3	XLOC_022277	17:37921096-38020441	2.34302	1	1	5.07364	no	2.13542	1	1	4.39365	no	2.18376	1	1	4.54336	no	2.16778	1	1	4.49331	no
INHA	XLOC_028318	2:220415450-220440435	2.34218	0.1405	0.654626	5.07068	no	3.55244	0.09075	0.451096	11.7325	no	0.808557	1	1	1.75146	no	-0.599039	1	1	0.660194	no
IL1RAPL2	XLOC_057460	X:103810995-105012102	2.34013	1	1	5.06348	no	2.19299	1	1	4.57252	no	1.23109	1	1	2.34744	no	-1.48412	1	1	0.357467	no
SUMO4	XLOC_042788	6:149539061-149732749	2.33594	1	1	5.0488	no	0.483464	1	1	1.3981	no	0.496873	1	1	1.41115	no	1.69436	1	1	3.23633	no
IL28A	XLOC_024831	19:39759153-39760732	2.33403	0.0764	0.485297	5.04212	no	1.96533	0.1073	0.489897	3.90502	no	3.17195	0.06915	0.524221	9.01264	no	1.06633	1	1	2.0941	no
BLNK	XLOC_006930	10:97889471-98031333	2.33398	0.009	0.128153	5.04194	no	2.25278	0.01675	0.140302	4.766	no	1.58134	0.09875	0.601557	2.99248	no	0.490953	0.54655	0.999777	1.40537	no
CRIP3	XLOC_043499	6:43263431-43276535	2.33368	1	1	5.0409	no	2.39816	1	1	5.2713	no	0.544758	1	1	1.45878	no	1.60044	1	1	3.03236	no
RP11-818O24.3	XLOC_020311	17:1323982-1366456	2.33296	1	1	5.03838	no	-0.851382	1	1	0.554254	no	-0.0078384	1	1	0.994582	no	#N/A	#N/A	#N/A	#N/A	#N/A
RP11-655M14.13	XLOC_009574	11:67385749-67394775	2.3326	1	1	5.03712	no	-0.244976	1	1	0.84383	no	1.56988	1	1	2.9688	no	#N/A	#N/A	#N/A	#N/A	#N/A
LRRC6	XLOC_049170	8:133584319-133687838	2.33084	1	1	5.03098	no	2.76701	5e-05	0.00116756	6.80696	yes	1.30512	1	1	2.47104	no	1.71012	1	1	3.27188	no
SLC28A1	XLOC_017031	15:85427884-85518876	2.32944	1	1	5.0261	no	3.07595	1	1	8.43244	no	2.04905	1	1	4.13833	no	#N/A	#N/A	#N/A	#N/A	#N/A
HAUS6P1	XLOC_044713	7:53255080-53256631	2.32652	1	1	5.01594	no	0.953908	1	1	1.93711	no	#N/A	#N/A	#N/A	#N/A	#N/A	2.57834	1	1	5.97252	no
C1orf177	XLOC_000850	1:55271735-55307925	2.32624	1	1	5.01497	no	2.27862	1	1	4.85214	no	0.481916	1	1	1.3966	no	1.31888	1	1	2.49472	no
SPDEF	XLOC_043398	6:34505578-34524110	2.32609	1	1	5.01444	no	4.1377	1	1	17.6024	no	1.75146	1	1	3.36699	no	#N/A	#N/A	#N/A	#N/A	#N/A
RP11-834C11.11	XLOC_012175	12:54538852-54541009	2.32481	1	1	5.01	no	0.716076	1	1	1.64271	no	#N/A	#N/A	#N/A	#N/A	#N/A	2.15609	1	1	4.45705	no
RBPMS2	XLOC_017706	15:65032090-65067817	2.32409	1	1	5.0075	no	3.02415	1	1	8.13504	no	-0.0108997	1	1	0.992473	no	0.771168	1	1	1.70665	no
ACTN3	XLOC_008072	11:66313865-66330800	2.32395	1	1	5.00701	no	3.40398	1	1	10.5852	no	0.478194	1	1	1.393	no	0.97097	1	1	1.96016	no
CA9	XLOC_049557	9:35658300-35681156	2.32029	0.1488	0.672085	4.99433	no	2.22966	0.1396	0.566662	4.69023	no	1.7458	0.33985	0.878338	3.35381	no	#N/A	#N/A	#N/A	#N/A	#N/A
CD200	XLOC_034283	3:112051914-112081659	2.3196	1	1	4.99194	no	2.24418	1	1	4.73768	no	1.46713	1	1	2.76471	no	#N/A	#N/A	#N/A	#N/A	#N/A
AC104135.4	XLOC_027181	2:75167232-75170446	2.31745	1	1	4.9845	no	3.00097	1	1	8.00538	no	0.907358	1	1	1.87561	no	1.18995	1	1	2.28145	no
SMPDL3B	XLOC_000461	1:28261503-28294607	2.31368	0.0291	0.278986	4.9715	no	4.02025	0.0002	0.00389186	16.2262	yes	-0.494687	1	1	0.709716	no	-0.202342	1	1	0.869139	no
PPM1E	XLOC_021266	17:56833227-57059782	2.31194	1	1	4.9655	no	1.84477	1	1	3.59196	no	3.0463	1	1	8.26091	no	1.78015	1	1	3.43462	no
APOL4	XLOC_033331	22:36585171-36600886	2.30354	1	1	4.93668	no	1.65222	1	1	3.14317	no	2.1971	1	1	4.58557	no	-0.361116	1	1	0.778562	no
RP11-815M8.1	XLOC_002317	1:222019431-222158306	2.29952	1	1	4.92294	no	2.3427	0.0055	0.0612691	5.07251	no	1.28515	1	1	2.43707	no	0.0324831	1	1	1.02277	no
C2orf62	XLOC_028285	2:219135114-219232822	2.29934	1	1	4.92233	no	2.56191	1	1	5.90489	no	-0.600481	1	1	0.659534	no	#N/A	#N/A	#N/A	#N/A	#N/A
-	XLOC_021783	17:8029353-8029901	2.29854	0.0527	0.397918	4.9196	no	1.75955	0.1859	0.655626	3.38592	no	2.05067	0.06525	0.50994	4.14298	no	1.1687	1	1	2.24809	no
-	XLOC_019088	16:79679470-79694763	2.29339	1	1	4.90207	no	3.02287	1	1	8.12783	no	0.988035	1	1	1.98348	no	0.050395	1	1	1.03555	no
AC016722.1,AC016722.2	XLOC_026952	2:47043806-47086146	2.28961	1	1	4.88924	no	2.14731	1	1	4.43001	no	2.24456	1	1	4.73893	no	1.15927	1	1	2.23344	no
RP11-320G24.1	XLOC_056948	X:40122146-40158187	2.289	1	1	4.88717	no	4.61204	0.00565	0.0625302	24.4547	no	0.657644	1	1	1.5775	no	-0.0314832	1	1	0.978414	no
CD36	XLOC_044994	7:79959507-80308593	2.28862	1	1	4.88589	no	0.129507	1	1	1.09392	no	1.72318	1	1	3.30163	no	1.23579	1	1	2.3551	no
ME3	XLOC_009816	11:86142631-86383678	2.28572	1	1	4.87607	no	2.11681	1	1	4.33734	no	1.3686	1	1	2.5822	no	0.0790352	1	1	1.05631	no
AC004510.3	XLOC_025769	19:15937854-15947865	2.28392	0.4417	0.955305	4.86999	no	1.78665	0.6002	0.973647	3.45013	no	-1.29354	1	1	0.407949	no	-0.638261	1	1	0.642487	no
-	XLOC_043312	6:31587702-31588121	2.28293	1	1	4.86665	no	2.18143	0.276	0.76475	4.53603	no	3.1282	0.24835	0.812893	8.74343	no	2.91847	0.2537	0.999777	7.56044	no
HSD11B1	XLOC_002226	1:209834708-209908295	2.28226	1	1	4.86439	no	3.37233	0.0025	0.0325426	10.3555	yes	0.649414	1	1	1.56853	no	0.617578	1	1	1.5343	no
RP11-118B22.2	XLOC_010404	12:9381128-9428413	2.28104	1	1	4.86028	no	0.225473	1	1	1.16916	no	#N/A	#N/A	#N/A	#N/A	#N/A	#N/A	#N/A	#N/A	#N/A	#N/A
HESX1	XLOC_035455	3:57231943-57260549	2.27959	1	1	4.8554	no	-0.332346	1	1	0.794244	no	0.511823	1	1	1.42585	no	0.842304	1	1	1.79291	no
AC103564.7	XLOC_029623	2:132587373-132589604	2.27929	1	1	4.85439	no	1.8561	1	1	3.62028	no	#N/A	#N/A	#N/A	#N/A	#N/A	1.16831	1	1	2.24748	no
RP11-111A22.1	XLOC_016515	15:40780239-40857319	2.27924	1	1	4.85422	no	1.32836	1	1	2.51117	no	#N/A	#N/A	#N/A	#N/A	#N/A	1.73199	1	1	3.32186	no
TCTE3	XLOC_044304	6:170140209-170151655	2.27733	1	1	4.8478	no	1.32134	1	1	2.49898	no	#N/A	#N/A	#N/A	#N/A	#N/A	2.0783	1	1	4.22309	no
RP11-44D15.3	XLOC_006929	10:97889471-98031333	2.27688	1	1	4.84629	no	2.24308	1	1	4.73407	no	#N/A	#N/A	#N/A	#N/A	#N/A	-0.0145229	1	1	0.989984	no
GOLGA6L2	XLOC_017270	15:23684644-23692381	2.27649	1	1	4.84498	no	1.13369	1	1	2.19419	no	#N/A	#N/A	#N/A	#N/A	#N/A	0.343219	1	1	1.26858	no
-	XLOC_023287	18:43869855-43871296	2.27543	1	1	4.84142	no	3.38653	1	1	10.458	no	0.483241	1	1	1.39788	no	1.79846	1	1	3.47849	no
RP11-386C23.1	XLOC_006656	10:65928714-65930611	2.275	1	1	4.83998	no	2.41758	1	1	5.34274	no	2.27088	1	1	4.82617	no	2.90443	1	1	7.48722	no
RP11-302J23.1	XLOC_047801	8:102064281-102088479	2.27496	1	1	4.83984	no	4.64874	1	1	25.0848	no	-0.0222134	1	1	0.984721	no	0.318772	1	1	1.24727	no
RP11-195E11.2	XLOC_050964	9:72658496-72873782	2.27037	1	1	4.82447	no	2.14912	1	1	4.43557	no	2.57698	1	1	5.96689	no	0.262354	1	1	1.19943	no
RP11-611D20.2	XLOC_050403	9:139440624-139444481	2.26787	0.0043	0.0769902	4.81612	no	2.3374	0.0023	0.0304312	5.05391	yes	1.81096	1	1	3.50876	no	1.64877	1	1	3.13566	no
HIST1H2AL	XLOC_041844	6:27833033-27833606	2.26571	1	1	4.80891	no	1.32488	1	1	2.50512	no	1.64328	1	1	3.12375	no	2.51526	1	1	5.71701	no
MCFD2P1	XLOC_043176	6:27372843-27375775	2.26452	1	1	4.80495	no	2.77221	0.0092	0.0899131	6.83154	no	2.46897	1	1	5.53648	no	1.19607	1	1	2.29115	no
FAM179A	XLOC_026840	2:29179476-29275096	2.26448	1	1	4.80481	no	3.73057	1	1	13.2744	no	2.32554	1	1	5.01253	no	0.0543994	1	1	1.03843	no
RP11-218L14.4	XLOC_057876	X:154695630-154899605	2.26383	1	1	4.80265	no	2.02585	1	1	4.07232	no	0.696545	1	1	1.62062	no	2.02975	1	1	4.08334	no
AC012363.10,AC012363.7,AC012363.8,MTND3P10,MTND4P26	XLOC_027607	2:120770516-121200563	2.25923	1	1	4.78736	no	2.80058	1	1	6.9672	no	3.2245	1	1	9.34698	no	1.17083	1	1	2.25141	no
NPTX1	XLOC_022907	17:78440827-78451643	2.25877	0.0049	0.0835947	4.78583	no	4.4805	5e-05	0.00116756	22.3236	yes	-0.536488	1	1	0.689447	no	0.272146	1	1	1.2076	no
PTGFR	XLOC_001007	1:78695282-79005434	2.25858	1	1	4.7852	no	2.16902	1	1	4.49718	no	1.40946	1	1	2.65638	no	0.388023	1	1	1.3086	no
CTD-3203P2.2	XLOC_018510	16:27236311-27301813	2.2584	0.11965	0.612085	4.78461	no	0.763424	1	1	1.69751	no	-0.807764	1	1	0.571267	no	0.774557	1	1	1.71066	no
SPRR1B	XLOC_001578	1:153003677-153005376	2.25795	0.00265	0.0534694	4.78311	no	2.77739	0.00025	0.00470905	6.85611	yes	1.70896	0.04825	0.435	3.26925	no	0.0994653	0.89405	0.999777	1.07138	no
-	XLOC_038806	4:183792895-183793879	2.2579	1	1	4.78295	no	1.81502	1	1	3.51865	no	1.7567	1	1	3.37924	no	1.48921	1	1	2.80735	no
-	XLOC_048736	8:74193699-74195372	2.25784	1	1	4.78275	no	1.00154	1	1	2.00214	no	2.60139	1	1	6.06871	no	2.46139	1	1	5.50747	no
CAPN11	XLOC_042190	6:44126547-44152139	2.25655	1	1	4.77847	no	4.2101	1	1	18.5083	no	2.32561	1	1	5.01278	no	2.02989	1	1	4.08374	no
AC008132.13	XLOC_032467	22:18834060-18848562	2.25166	1	1	4.7623	no	4.35214	1	1	20.4232	no	4.63449	1	1	24.8382	no	#N/A	#N/A	#N/A	#N/A	#N/A
CYP2D7P1	XLOC_033447	22:42536213-42540576	2.2489	1	1	4.7532	no	2.01035	1	1	4.0288	no	2.19494	1	1	4.57871	no	1.82538	1	1	3.544	no
BARX1	XLOC_051120	9:96713627-96717654	2.24705	1	1	4.74711	no	2.59451	1	1	6.03984	no	1.94088	1	1	3.8394	no	0.0964483	1	1	1.06914	no
KCNK9	XLOC_049198	8:140613080-140715299	2.24627	1	1	4.74455	no	3.12642	1	1	8.73265	no	0.479375	1	1	1.39414	no	2.6853	1	1	6.43215	no
SLC5A12	XLOC_009083	11:26688565-26744974	2.24373	1	1	4.7362	no	1.64729	1	1	3.13245	no	2.46095	1	1	5.50579	no	1.31273	1	1	2.48411	no
CRTAC1	XLOC_006951	10:99609995-99790585	2.24313	1	1	4.73423	no	4.21291	0.00405	0.0482812	18.5444	yes	-0.740517	1	1	0.598525	no	-0.62154	1	1	0.649977	no
-	XLOC_014504	14:50103888-50104848	2.24284	1	1	4.73328	no	0.721719	1	1	1.64915	no	0.625396	1	1	1.54263	no	1.26575	1	1	2.40452	no
RP11-830F9.5	XLOC_019182	16:88941265-89043612	2.24174	0.0131	0.165373	4.72967	no	2.3678	0.0072	0.0746098	5.16153	no	0.391356	1	1	1.31163	no	-0.938019	1	1	0.521949	no
AL008733.1,RP1-163G9.1	XLOC_002681	1:2976178-2985001	2.23893	1	1	4.72047	no	3.0219	0.0035	0.0427576	8.12237	yes	-1.10881	1	1	0.463676	no	3.01978	1	1	8.11044	no
ACVRL1	XLOC_010771	12:52300691-52317145	2.23367	1	1	4.70329	no	3.82058	5e-05	0.00116756	14.1289	yes	1.16682	1	1	2.24516	no	-0.624796	1	1	0.648511	no
DEFB1	XLOC_048150	8:6666037-6742798	2.232	0.14535	0.663546	4.69785	no	4.45693	0.09135	0.452168	21.9619	no	0.419152	1	1	1.33714	no	#N/A	#N/A	#N/A	#N/A	#N/A
-	XLOC_049560	9:35763882-35765065	2.2303	1	1	4.69232	no	2.94196	1	1	7.68455	no	1.48989	1	1	2.80868	no	2.55215	1	1	5.86508	no
ZBP1	XLOC_031631	20:56178901-56195632	2.22994	1	1	4.69114	no	2.47603	0.20605	0.682092	5.56364	no	1.89465	1	1	3.71832	no	0.662172	1	1	1.58246	no
-	XLOC_008797	11:2185158-2200498	2.22988	1	1	4.69095	no	2.7622	1	1	6.7843	no	#N/A	#N/A	#N/A	#N/A	#N/A	#N/A	#N/A	#N/A	#N/A	#N/A
-	XLOC_031267	20:21483485-21485765	2.22892	1	1	4.68783	no	1.73171	1	1	3.32121	no	2.98457	1	1	7.91489	no	2.70258	1	1	6.50965	no
CACNA2D2	XLOC_035391	3:50400232-50541675	2.22431	1	1	4.67287	no	4.3599	5e-05	0.00116756	20.5334	yes	-1.79007	1	1	0.289158	no	-1.73561	1	1	0.300282	no
AC005592.3	XLOC_039876	5:142083346-142084986	2.22236	1	1	4.66656	no	2.72555	1	1	6.61412	no	2.06694	1	1	4.18997	no	-0.0249005	1	1	0.982888	no
RBM20	XLOC_005983	10:112404154-112599227	2.22232	1	1	4.66643	no	0.992623	1	1	1.9898	no	-2.2597	1	1	0.208815	no	#N/A	#N/A	#N/A	#N/A	#N/A
MMP10	XLOC_009932	11:102617698-102714534	2.22201	0.04995	0.388718	4.66543	no	1.65121	0.1681	0.622841	3.14097	no	0.733617	1	1	1.6628	no	0.132754	1	1	1.09638	no
RAB41	XLOC_057230	X:69501942-69505819	2.22141	1	1	4.66349	no	-0.247913	1	1	0.842114	no	1.48704	1	1	2.80313	no	1.79973	1	1	3.48155	no
SNCB	XLOC_041503	5:176047084-176057543	2.22022	0.00255	0.0518859	4.65964	no	4.82942	5e-05	0.00116756	28.4315	yes	0.24194	1	1	1.18258	no	-0.80645	1	1	0.571787	no
-	XLOC_005757	10:88787749-88788350	2.21629	1	1	4.64697	no	3.92248	0.2032	0.680131	15.163	no	-0.299277	1	1	0.81266	no	#N/A	#N/A	#N/A	#N/A	#N/A
-	XLOC_031671	20:61193788-61200368	2.21556	1	1	4.64462	no	3.45376	0.14185	0.570346	10.9568	no	3.2055	1	1	9.22469	no	1.58391	1	1	2.99781	no
C10orf91	XLOC_006141	10:134257830-134262912	2.2147	1	1	4.64185	no	1.4171	1	1	2.67048	no	-0.39916	1	1	0.7583	no	1.62717	1	1	3.08906	no
DCHS1	XLOC_008920	11:6642555-6677085	2.21048	1	1	4.62829	no	0.888985	1	1	1.85187	no	3.40368	1	1	10.583	no	2.53713	1	1	5.80433	no
RP11-396C23.2	XLOC_002357	1:226274581-226277993	2.21015	1	1	4.62723	no	3.64063	0.22655	0.70716	12.4721	no	2.5564	0.27685	0.837382	5.88238	no	1.02115	1	1	2.02954	no
CGB,CGB1,CGB8,CTB-60B18.6	XLOC_026345	19:49526126-49552400	2.20941	0.0049	0.0835947	4.62486	no	3.98915	5e-05	0.00116756	15.8801	yes	-1.46718	1	1	0.361689	no	-1.47315	1	1	0.360195	no
APOBR	XLOC_018522	16:28467692-28510291	2.2093	1	1	4.62451	no	3.33301	1	1	10.0771	no	1.39063	1	1	2.62193	no	0.821528	1	1	1.76728	no
KCNQ1	XLOC_007296	11:2465913-2882798	2.20871	0.0664	0.456563	4.62262	no	3.10069	0.0262	0.19586	8.57829	no	-0.341281	1	1	0.78934	no	-0.628401	1	1	0.646893	no
FAM211A	XLOC_020539	17:16342135-16395467	2.20832	0.30625	0.86264	4.62137	no	1.27821	0.61645	0.976092	2.42538	no	2.33259	0.42965	0.934615	5.03709	no	1.65432	0.51785	0.999777	3.14775	no
RBFOX3	XLOC_022894	17:77085426-77613550	2.20629	1	1	4.61487	no	4.51663	5e-05	0.00116756	22.8898	yes	1.80483	1	1	3.49388	no	-1.15597	1	1	0.448764	no
SERPINB12	XLOC_023420	18:61223392-61234244	2.2055	1	1	4.61234	no	-0.94449	1	1	0.519613	no	0.920773	1	1	1.89313	no	-1.02132	1	1	0.492665	no
AC132186.1	XLOC_019982	16:66461167-66586447	2.20479	1	1	4.61007	no	-0.114487	1	1	0.923711	no	0.23106	1	1	1.1737	no	0.727479	1	1	1.65574	no
RASGEF1B	XLOC_038200	4:82347546-82965397	2.20422	1	1	4.60825	no	1.26418	1	1	2.40191	no	1.92701	1	1	3.80266	no	-0.0729349	1	1	0.950702	no
MYCN	XLOC_026728	2:16060520-16087129	2.20361	1	1	4.60631	no	2.07594	1	1	4.21619	no	-0.27163	1	1	0.828383	no	#N/A	#N/A	#N/A	#N/A	#N/A
-	XLOC_013060	13:34253526-34261306	2.20057	0.0294	0.280006	4.59661	no	1.25864	0.1367	0.559903	2.3927	no	2.35591	0.02545	0.320394	5.11917	no	1.19021	0.19685	0.995314	2.28186	no
NGB	XLOC_015783	14:77731825-77737655	2.19846	1	1	4.58989	no	3.25001	0.006	0.0655032	9.51372	no	-1.22721	1	1	0.427143	no	-0.180246	1	1	0.882552	no
RP11-44M6.1	XLOC_046495	7:100106642-100117549	2.19431	0.20755	0.768074	4.57671	no	1.8738	0.23125	0.71238	3.66497	no	1.77853	1	1	3.43076	no	1.75954	1	1	3.3859	no
CITED1	XLOC_058405	X:71401202-71527037	2.19282	1	1	4.57198	no	2.33785	1	1	5.05549	no	3.21369	1	1	9.2772	no	2.08949	1	1	4.25598	no
ARIH2OS	XLOC_035349	3:48955220-49060905	2.1918	1	1	4.56875	no	1.95818	1	1	3.88571	no	1.95886	1	1	3.88755	no	0.859655	1	1	1.8146	no
-	XLOC_000099	1:4849240-4850449	2.19176	1	1	4.56862	no	3.89207	1	1	14.8467	no	0.224862	1	1	1.16867	no	2.18986	1	1	4.56261	no
-	XLOC_014037	13:109873440-109874327	2.19014	1	1	4.5635	no	0.860426	1	1	1.81557	no	1.12824	1	1	2.18592	no	2.42101	1	1	5.35546	no
NIPSNAP3B	XLOC_050068	9:107526437-107539738	2.18564	1	1	4.54929	no	1.98375	1	1	3.9552	no	0.992928	1	1	1.99022	no	1.84242	1	1	3.58611	no
GPR98	XLOC_039483	5:89811427-90460038	2.18288	1	1	4.54059	no	-0.329348	1	1	0.795896	no	2.21597	1	1	4.64594	no	0.0476638	1	1	1.03359	no
RP11-34P13.15,RP11-34P13.16	XLOC_002604	1:134900-139697	2.17777	1	1	4.52454	no	0.880033	1	1	1.84042	no	0.182672	1	1	1.13498	no	0.222727	1	1	1.16694	no
ANKRD20A2,RP11-146D12.2	XLOC_049647	9:42368302-42474269	2.17199	1	1	4.50645	no	2.51733	1	1	5.72522	no	0.797957	1	1	1.73864	no	-0.203211	1	1	0.868615	no
EGR3	XLOC_048341	8:22545171-22941132	2.17078	0.1804	0.726167	4.50267	no	2.77861	0.11125	0.498701	6.86191	no	-0.370009	0.79605	0.994059	0.773778	no	-1.5127	0.36635	0.999777	0.350455	no
CXorf58	XLOC_056843	X:23851469-23957624	2.16962	1	1	4.49905	no	-0.521106	1	1	0.696837	no	#N/A	#N/A	#N/A	#N/A	#N/A	0.530723	1	1	1.44465	no
-	XLOC_021606	17:81018041-81018831	2.1689	1	1	4.4968	no	2.8488	0.09465	0.459237	7.20401	no	-1.15824	1	1	0.448059	no	#N/A	#N/A	#N/A	#N/A	#N/A
RP11-1114A5.5	XLOC_057703	X:135923089-135962923	2.16814	1	1	4.49444	no	0.202346	1	1	1.15057	no	-0.295805	1	1	0.814618	no	#N/A	#N/A	#N/A	#N/A	#N/A
GIPC3	XLOC_024168	19:3585550-3593539	2.16201	1	1	4.47538	no	3.14645	1	1	8.85474	no	-1.12655	1	1	0.45801	no	-0.819234	1	1	0.566743	no
CTD-2162K18.5	XLOC_024786	19:37288419-37407193	2.16201	1	1	4.47538	no	0.926477	1	1	1.90063	no	2.88428	1	1	7.38337	no	1.89647	1	1	3.72301	no
MSLNL	XLOC_019237	16:819261-833370	2.15639	1	1	4.45798	no	2.80826	1	1	7.00439	no	0.288592	1	1	1.22145	no	0.657851	1	1	1.57773	no
ZEB2	XLOC_029692	2:145145567-145282147	2.1536	1	1	4.44937	no	0.218869	1	1	1.16382	no	1.55958	1	1	2.94768	no	1.69541	1	1	3.23869	no
USP30-AS1	XLOC_012645	12:109460893-109525831	2.15336	1	1	4.44863	no	1.75893	1	1	3.38447	no	2.85084	1	1	7.2142	no	-0.00671555	1	1	0.995356	no
SLC30A2	XLOC_002977	1:26363742-26372624	2.15245	1	1	4.44582	no	2.41552	1	1	5.33512	no	-1.55901	1	1	0.339384	no	-1.21449	1	1	0.430925	no
SPDYC	XLOC_008017	11:64937624-64940715	2.14966	0.0244	0.24789	4.43723	no	2.73858	0.0064	0.068549	6.67413	no	-0.141206	1	1	0.906761	no	-0.226314	1	1	0.854816	no
ATP6V0D2	XLOC_047691	8:86999551-87166457	2.14877	1	1	4.4345	no	3.17498	1	1	9.03159	no	#N/A	#N/A	#N/A	#N/A	#N/A	-1.02821	1	1	0.490318	no
AP000320.6	XLOC_032239	21:35736322-35747647	2.14828	0.0726	0.476768	4.43299	no	-0.187984	1	1	0.877832	no	0.113859	1	1	1.08212	no	-1.15254	1	1	0.449833	no
RP5-1042I8.7	XLOC_003872	1:120451877-120453236	2.14694	1	1	4.42887	no	1.20105	1	1	2.29907	no	-0.277889	1	1	0.824797	no	0.723243	1	1	1.65089	no
RP11-326F20.5	XLOC_050674	9:33104079-33185129	2.14635	0.22075	0.779642	4.42706	no	2.33714	0.1753	0.634457	5.053	no	0.624352	0.719	0.994059	1.54152	no	-0.539249	0.77645	0.999777	0.688129	no
-	XLOC_003188	1:41156110-41156707	2.14567	1	1	4.42498	no	3.30365	0.228	0.708361	9.87411	no	2.73469	1	1	6.65616	no	-0.00301884	1	1	0.99791	no
RP11-455F5.3	XLOC_018560	16:30103634-30115437	2.14469	1	1	4.42197	no	2.06075	1	1	4.17203	no	0.362598	1	1	1.28574	no	-0.0726773	1	1	0.950872	no
AC012358.4	XLOC_026999	2:55401926-55462989	2.14384	1	1	4.41937	no	1.72104	1	1	3.29674	no	1.7275	1	1	3.31153	no	1.09033	1	1	2.12923	no
ATP1B2	XLOC_020433	17:7549944-7561086	2.14246	1	1	4.41514	no	3.77557	0.2424	0.72682	13.6949	no	#N/A	#N/A	#N/A	#N/A	#N/A	#N/A	#N/A	#N/A	#N/A	#N/A
WNT10B	XLOC_012057	12:49359122-49365548	2.14153	0.0044	0.078104	4.4123	no	3.42015	5e-05	0.00116756	10.7045	yes	0.455416	1	1	1.37118	no	0.459593	1	1	1.37515	no
RP11-66B24.4	XLOC_017182	15:101389765-101626271	2.14103	0.47855	0.971263	4.41077	no	0.227712	0.9109	0.996063	1.17098	no	1.95174	0.5017	0.95625	3.86841	no	1.34407	0.6119	0.999777	2.53866	no
C6orf201	XLOC_041621	6:4021500-4157619	2.14041	1	1	4.40887	no	-1.17909	1	1	0.44163	no	1.11846	1	1	2.17115	no	-0.817791	1	1	0.56731	no
YPEL4	XLOC_009333	11:57405496-57429340	2.13882	1	1	4.40402	no	4.01965	5e-05	0.00116756	16.2194	yes	1.46548	1	1	2.76155	no	0.56405	1	1	1.47841	no
BARX2	XLOC_008696	11:129245834-129322171	2.1371	1	1	4.39877	no	2.11181	1	1	4.32233	no	1.00492	1	1	2.00683	no	1.84565	1	1	3.59415	no
DNAI1	XLOC_049533	9:34398181-34520982	2.13695	1	1	4.39831	no	2.24398	1	1	4.73702	no	0.175467	1	1	1.12933	no	-0.415139	1	1	0.749947	no
-	XLOC_049994	9:98802000-98802949	2.13513	1	1	4.39277	no	1.64513	1	1	3.12776	no	0.300649	1	1	1.2317	no	1.36602	1	1	2.57758	no
-	XLOC_037410	4:152028628-152029611	2.13433	1	1	4.39033	no	2.31772	1	1	4.98544	no	2.92375	1	1	7.58816	no	#N/A	#N/A	#N/A	#N/A	#N/A
EMX2OS	XLOC_007091	10:119184704-119309441	2.12481	0.02585	0.25809	4.36146	no	2.88641	0.00795	0.080687	7.39428	no	0.252915	1	1	1.19161	no	1.00821	1	1	2.01141	no
PDE1A	XLOC_029949	2:183004762-183387919	2.12425	1	1	4.35976	no	-3.08106	1	1	0.11817	no	0.735927	1	1	1.66547	no	0.027819	1	1	1.01947	no
GATA5	XLOC_031668	20:61038552-61051026	2.12351	0.00735	0.110418	4.35753	no	3.13667	0.00065	0.0107478	8.79492	yes	-0.391304	1	1	0.76244	no	-1.33652	1	1	0.395975	no
LINGO2	XLOC_050642	9:27947871-28947861	2.12038	1	1	4.34808	no	0.90177	1	1	1.86836	no	-1.48048	1	1	0.35837	no	-0.228706	1	1	0.8534	no
TMEM59L	XLOC_024527	19:18682539-18731849	2.11983	0.288	0.844543	4.34643	no	2.95219	0.0861	0.436421	7.73923	no	-0.569484	1	1	0.673858	no	-1.35798	1	1	0.390128	no
KCNT1	XLOC_050393	9:138594030-138684992	2.11857	1	1	4.34263	no	5.2565	1	1	38.2265	no	1.321	1	1	2.49839	no	#N/A	#N/A	#N/A	#N/A	#N/A
-	XLOC_048069	8:144831824-144832809	2.11771	1	1	4.34004	no	2.31769	1	1	4.98533	no	1.25765	1	1	2.39106	no	0.688462	1	1	1.61156	no
-	XLOC_009224	11:47626932-47628130	2.11751	1	1	4.33944	no	1.51764	1	1	2.86322	no	1.19486	1	1	2.28923	no	0.950687	1	1	1.93279	no
FOXF1	XLOC_019145	16:86544132-86548076	2.11176	1	1	4.32218	no	3.15275	1	1	8.89349	no	#N/A	#N/A	#N/A	#N/A	#N/A	#N/A	#N/A	#N/A	#N/A	#N/A
-	XLOC_047562	8:68286359-68287475	2.10996	1	1	4.31679	no	2.2223	1	1	4.66637	no	1.98802	1	1	3.96692	no	1.94729	1	1	3.85649	no
MZB1	XLOC_041202	5:138723168-138725770	2.10789	1	1	4.3106	no	2.06997	1	1	4.19878	no	0.286744	1	1	1.21988	no	0.188538	1	1	1.13961	no
GAS2L2	XLOC_022199	17:34071529-34079897	2.1073	1	1	4.30884	no	2.32747	1	1	5.01924	no	0.116685	1	1	1.08424	no	1.10245	1	1	2.14719	no
AP003774.4	XLOC_007998	11:64216545-64219126	2.1062	1	1	4.30556	no	2.14566	1	1	4.42495	no	-0.084491	1	1	0.943117	no	0.442856	1	1	1.35929	no
SPRR2G	XLOC_004081	1:153122057-153123345	2.10289	0.101	0.565467	4.29569	no	3.93251	0.0335	0.234071	15.2687	no	-0.608931	1	1	0.655682	no	#N/A	#N/A	#N/A	#N/A	#N/A
AL953854.2	XLOC_050875	9:47295854-47314322	2.09894	1	1	4.28395	no	2.16339	1	1	4.47966	no	2.07937	1	1	4.22623	no	0.572623	1	1	1.48723	no
AC017104.6	XLOC_028393	2:232253686-232259702	2.09742	1	1	4.27943	no	2.13298	1	1	4.38623	no	1.58367	1	1	2.99731	no	2.28189	1	1	4.86315	no
RCSD1	XLOC_001830	1:167596621-167675486	2.09156	1	1	4.26209	no	1.71174	1	1	3.27556	no	0.571431	1	1	1.486	no	0.972071	1	1	1.96165	no
SDS	XLOC_012696	12:113830249-113876151	2.08843	1	1	4.25285	no	3.37167	1	1	10.3508	no	2.51689	1	1	5.72347	no	#N/A	#N/A	#N/A	#N/A	#N/A
CTD-3088G3.8	XLOC_019444	16:11453701-11617444	2.0869	1	1	4.24834	no	3.55429	1	1	11.7476	no	-0.975461	1	1	0.508577	no	0.0208817	1	1	1.01458	no
CXCR2	XLOC_028276	2:218990011-219001976	2.08525	1	1	4.24349	no	#N/A	#N/A	#N/A	#N/A	#N/A	-0.522073	1	1	0.696371	no	#N/A	#N/A	#N/A	#N/A	#N/A
MMP3	XLOC_009935	11:102617698-102714534	2.0846	1	1	4.24157	no	-0.364753	1	1	0.776602	no	0.743148	1	1	1.67382	no	1.476	1	1	2.78176	no
-	XLOC_049288	8:146046233-146047032	2.08426	0.0691	0.464746	4.24058	no	-1.59214	1	1	0.331679	no	0.686431	1	1	1.6093	no	0.309339	1	1	1.23914	no
TAS1R3	XLOC_000042	1:1266693-1284730	2.08393	0.4719	0.968366	4.23961	no	3.32745	0.1431	0.572962	10.0383	no	0.514846	1	1	1.42884	no	-0.506534	1	1	0.703912	no
KLK13	XLOC_026412	19:51559462-51568371	2.08297	1	1	4.23679	no	1.76522	1	1	3.39926	no	-0.634707	1	1	0.644072	no	#N/A	#N/A	#N/A	#N/A	#N/A
LINC00519	XLOC_015512	14:51771133-51795104	2.08181	1	1	4.23338	no	1.16595	1	1	2.24381	no	2.06247	1	1	4.17701	no	2.08404	1	1	4.23993	no
HBQ1	XLOC_018151	16:230451-231180	2.07833	1	1	4.22318	no	2.07445	1	1	4.21184	no	0.505882	1	1	1.41999	no	1.70068	1	1	3.25054	no
GPR77	XLOC_025007	19:47835403-47847281	2.07635	1	1	4.21739	no	4.55534	0.00565	0.0625302	23.5122	no	#N/A	#N/A	#N/A	#N/A	#N/A	-1.15597	1	1	0.448764	no
LCE1C	XLOC_004072	1:152777310-152779107	2.07496	1	1	4.21333	no	2.49189	1	1	5.62514	no	1.93088	1	1	3.81288	no	#N/A	#N/A	#N/A	#N/A	#N/A
RP11-867G2.5	XLOC_008386	11:94277005-94658686	2.07472	1	1	4.21263	no	0.142959	1	1	1.10417	no	1.26379	1	1	2.40126	no	-0.00949241	1	1	0.993442	no
ACSM3	XLOC_018437	16:20621564-20936328	2.07445	0.00555	0.0910338	4.21184	no	2.24789	0.00645	0.0689879	4.74988	no	2.06768	0.0073	0.157199	4.19212	no	0.894562	1	1	1.85905	no
-	XLOC_006360	10:27233523-27234463	2.07251	1	1	4.20618	no	4.00564	0.2264	0.706992	16.0627	no	#N/A	#N/A	#N/A	#N/A	#N/A	-0.0166782	1	1	0.988506	no
CALCB	XLOC_007481	11:14926542-15103888	2.07176	1	1	4.20399	no	0.721492	1	1	1.64889	no	3.99059	1	1	15.896	no	1.98085	1	1	3.94726	no
-	XLOC_046045	7:45120022-45132068	2.07106	1	1	4.20195	no	4.08558	1	1	16.9778	no	#N/A	#N/A	#N/A	#N/A	#N/A	0.31887	1	1	1.24735	no
RP11-797A18.4	XLOC_017866	15:77334177-77335533	2.07067	1	1	4.20082	no	0.84181	1	1	1.7923	no	-0.51609	1	1	0.699264	no	2.34684	1	1	5.08709	no
ITGAD	XLOC_018606	16:31404632-31437826	2.07048	1	1	4.20026	no	-1.11804	1	1	0.460719	no	#N/A	#N/A	#N/A	#N/A	#N/A	1.99143	1	1	3.97631	no
CYP2D8P1	XLOC_033449	22:42545876-42551007	2.07032	1	1	4.1998	no	1.15683	1	1	2.22967	no	2.62389	1	1	6.1641	no	-0.0238675	1	1	0.983592	no
ANGPT4	XLOC_031082	20:853295-896977	2.06988	1	1	4.19852	no	1.31293	1	1	2.48446	no	1.25185	1	1	2.38147	no	1.90378	1	1	3.74192	no
RNY4P10	XLOC_042020	6:33161364-33172216	2.06925	0.5107	0.982417	4.19668	no	#N/A	#N/A	#N/A	#N/A	#N/A	#N/A	#N/A	#N/A	#N/A	#N/A	#N/A	#N/A	#N/A	#N/A	#N/A
RAG2	XLOC_009151	11:36532258-36694823	2.06784	0.0614	0.434151	4.19258	no	0.826779	1	1	1.77372	no	-0.146681	1	1	0.903326	no	2.12345	0.0445	0.626595	4.35735	no
BTF3L4P2	XLOC_027850	2:159825137-160089410	2.06372	0.3825	0.930491	4.18063	no	1.51424	0.4484	0.90989	2.85648	no	1.80032	0.425	0.932482	3.48297	no	2.54932	0.23105	0.999777	5.85358	no
RHCE	XLOC_002970	1:25568727-25756683	2.05851	0.0197	0.215909	4.16556	no	1.70343	0.02335	0.180738	3.25674	no	0.430286	1	1	1.3475	no	-0.932067	1	1	0.524107	no
LYG1	XLOC_029374	2:99613723-100106497	2.05741	1	1	4.16238	no	2.31309	0.27845	0.767506	4.96946	no	1.37728	1	1	2.59778	no	0.90172	1	1	1.86829	no
CLIC2	XLOC_058985	X:154505499-154563966	2.05402	1	1	4.15261	no	1.74616	1	1	3.35464	no	-0.383795	1	1	0.766419	no	#N/A	#N/A	#N/A	#N/A	#N/A
FOLR1	XLOC_008170	11:71874365-71920285	2.05319	1	1	4.15023	no	5.26105	0.23895	0.723433	38.3472	no	-1.01682	1	1	0.494204	no	-1.01688	1	1	0.494184	no
KATNB1	XLOC_019930	16:57768458-57791162	2.05071	0.50245	0.980136	4.1431	no	0.721609	1	1	1.64902	no	0.579318	1	1	1.49414	no	0.481303	1	1	1.396	no
LINC00271	XLOC_042708	6:135604669-136037193	2.04958	1	1	4.13985	no	0.860641	1	1	1.81584	no	1.89979	1	1	3.73159	no	-0.635146	1	1	0.643876	no
RP11-519G16.5	XLOC_017531	15:45722726-45878488	2.04915	1	1	4.13862	no	1.97522	1	1	3.93188	no	2.03421	1	1	4.09598	no	#N/A	#N/A	#N/A	#N/A	#N/A
SMAD9	XLOC_013648	13:37418967-37494902	2.04862	1	1	4.1371	no	3.03913	1	1	8.21995	no	0.00318174	1	1	1.00221	no	3.64625	1	1	12.5208	no
RP11-314A20.5	XLOC_021705	17:4634722-4643217	2.04839	0.43795	0.955305	4.13644	no	1.76341	0.48205	0.93061	3.395	no	1.69905	1	1	3.24687	no	1.01122	1	1	2.01561	no
-	XLOC_033947	3:50689737-50690367	2.04791	1	1	4.13506	no	2.8243	0.2061	0.682092	7.0827	no	-0.297172	1	1	0.813846	no	1.88291	1	1	3.68818	no
RP11-262H14.5	XLOC_050888	9:66493571-66494196	2.04517	0.0257	0.256769	4.12722	no	0.262061	0.7695	0.995068	1.19919	no	1.49955	0.0848	0.572925	2.82755	no	1.01452	0.22905	0.999777	2.02023	no
-	XLOC_057896	X:2484093-2527236	2.04394	0.00825	0.120194	4.1237	no	2.01343	0.0058	0.0638668	4.03741	no	2.26023	0.0042	0.113449	4.79068	no	1.12137	1	1	2.17553	no
NPW	XLOC_018216	16:2059926-2070756	2.03637	0.02435	0.247555	4.10212	no	2.5029	0.00905	0.0889587	5.66824	no	1.77032	0.04705	0.429752	3.4113	no	1.67926	1	1	3.20264	no
IQGAP2	XLOC_039379	5:75699073-76031606	2.03341	1	1	4.09371	no	3.18258	1	1	9.07929	no	1.00246	1	1	2.00341	no	3.13908	1	1	8.80962	no
GPR37L1	XLOC_002123	1:202036721-202098809	2.02773	1	1	4.07763	no	2.40544	0.00975	0.0941454	5.29797	no	0.568184	1	1	1.48266	no	-1.10924	1	1	0.463538	no
C19orf77	XLOC_025488	19:3474404-3480540	2.02456	0.0113	0.148346	4.06868	no	3.23652	0.00035	0.00629054	9.42518	yes	-0.609856	1	1	0.655262	no	-1.05716	1	1	0.480577	no
AC006378.2	XLOC_046419	7:93592073-93640425	2.02306	0.4736	0.968723	4.06445	no	0.765149	0.7467	0.992707	1.69955	no	-0.884964	1	1	0.541501	no	0.843427	1	1	1.79431	no
ITGA2B	XLOC_022427	17:42449547-42466873	2.02275	1	1	4.06358	no	1.79688	1	1	3.47468	no	2.49356	1	1	5.63166	no	0.444142	1	1	1.3605	no
AC091178.1,CTD-2206N4.4	XLOC_020931	17:37213271-37310647	2.02245	1	1	4.06273	no	1.22503	1	1	2.3376	no	1.70636	1	1	3.26336	no	0.726502	1	1	1.65462	no
C21orf128	XLOC_032316	21:43483067-43563105	2.02166	1	1	4.06051	no	1.70449	1	1	3.25914	no	#N/A	#N/A	#N/A	#N/A	#N/A	-0.273839	1	1	0.827116	no
B3GALT6	XLOC_002638	1:1167628-1172581	2.02163	1	1	4.06042	no	3.02637	0.25855	0.745862	8.14757	no	-1.65247	1	1	0.318095	no	#N/A	#N/A	#N/A	#N/A	#N/A
C17orf72	XLOC_021334	17:62073430-62097994	2.02113	1	1	4.05902	no	4.40067	1	1	21.1219	no	#N/A	#N/A	#N/A	#N/A	#N/A	#N/A	#N/A	#N/A	#N/A	#N/A
RP1-149A16.15,RP1-149A16.17,RP1-149A16.3	XLOC_032794	22:32750871-32781618	2.01739	1	1	4.04851	no	2.52745	1	1	5.76552	no	2.69384	1	1	6.47033	no	2.7243	1	1	6.6084	no
SYT5	XLOC_026532	19:55663136-55691809	2.01574	0.04955	0.386437	4.04388	no	2.94627	0.003	0.0377344	7.70754	yes	-0.733749	1	1	0.601339	no	-1.25927	1	1	0.417755	no
RP11-834C11.4	XLOC_010831	12:54519881-54526627	2.01512	1	1	4.04214	no	1.84852	1	1	3.60131	no	1.16	1	1	2.23457	no	1.43138	1	1	2.69705	no
IFNK	XLOC_049465	9:27325206-27529779	2.0112	1	1	4.03117	no	0.876619	1	1	1.83607	no	#N/A	#N/A	#N/A	#N/A	#N/A	#N/A	#N/A	#N/A	#N/A	#N/A
RP5-1121A15.4	XLOC_045650	7:156786744-156803343	2.01069	0.45875	0.963207	4.02975	no	1.42424	1	1	2.68373	no	#N/A	#N/A	#N/A	#N/A	#N/A	-0.0222019	1	1	0.984729	no
SLITRK3	XLOC_036119	3:164904507-164914897	2.01035	1	1	4.0288	no	3.32532	1	1	10.0235	no	#N/A	#N/A	#N/A	#N/A	#N/A	#N/A	#N/A	#N/A	#N/A	#N/A
FAM87A,RP11-63E5.8	XLOC_048121	8:325933-333174	2.01017	1	1	4.0283	no	3.41648	1	1	10.6773	no	3.60141	1	1	12.1376	no	0.318693	1	1	1.2472	no
RP11-400N9.1	XLOC_030334	2:234259777-234262062	2.00953	1	1	4.02651	no	0.715803	1	1	1.6424	no	#N/A	#N/A	#N/A	#N/A	#N/A	0.318749	1	1	1.24725	no
RTDR1	XLOC_033157	22:23401592-23487208	2.00938	0.1019	0.568526	4.02609	no	1.6278	0.2695	0.757443	3.09041	no	0.498439	1	1	1.41268	no	-0.615189	1	1	0.652844	no
AC011450.1	XLOC_026356	19:49831423-49891338	2.00913	1	1	4.02539	no	1.6001	1	1	3.03164	no	-0.0218828	1	1	0.984946	no	#N/A	#N/A	#N/A	#N/A	#N/A
RP11-6D1.6	XLOC_047943	8:125842430-125974396	2.00912	0.0048	0.0826686	4.02537	no	2.33602	0.0008	0.0128126	5.04908	yes	1.75172	0.0118	0.205444	3.3676	no	1.62577	0.0381	0.580802	3.08607	no
PIWIL1	XLOC_011529	12:130822431-130857182	2.00892	1	1	4.02481	no	0.936307	1	1	1.91362	no	#N/A	#N/A	#N/A	#N/A	#N/A	-1.36042	1	1	0.389469	no
CTD-3064M3.4	XLOC_049209	8:142400038-142442650	2.00849	1	1	4.02361	no	3.15156	1	1	8.88616	no	-0.0202176	1	1	0.986084	no	#N/A	#N/A	#N/A	#N/A	#N/A
RP11-1069G10.2	XLOC_016754	15:63188010-63191742	2.00814	1	1	4.02263	no	2.47561	1	1	5.56202	no	2.30262	1	1	4.93353	no	1.15878	1	1	2.23269	no
-	XLOC_044857	7:65303596-65304635	2.00756	1	1	4.02102	no	2.50568	1	1	5.67917	no	2.25689	1	1	4.7796	no	1.99115	1	1	3.97554	no
RNF175	XLOC_038642	4:154631276-154681387	2.00596	1	1	4.01656	no	3.00171	1	1	8.00949	no	1.49383	1	1	2.81636	no	2.25578	1	1	4.77592	no
SCIN	XLOC_044429	7:12609750-12693228	2.00558	1	1	4.0155	no	2.66232	1	1	6.3305	no	0.529716	1	1	1.44364	no	2.94688	1	1	7.7108	no
RP11-362A1.1	XLOC_011105	12:82347497-82399641	2.00531	0.00875	0.125457	4.01475	no	3.09141	0.0003	0.00552166	8.52329	yes	1.31306	0.0656	0.510953	2.48468	no	0.115873	1	1	1.08363	no
RP11-15F12.1	XLOC_023303	18:46550072-46987717	2.00512	1	1	4.01422	no	2.33414	1	1	5.0425	no	-0.0111584	1	1	0.992295	no	#N/A	#N/A	#N/A	#N/A	#N/A
NDUFA4L2	XLOC_012247	12:57623109-57634498	2.00478	0.0635	0.443715	4.01327	no	1.32051	0.21995	0.699841	2.49754	no	0.493074	1	1	1.40744	no	0.748112	1	1	1.67959	no
RP11-73B2.6	XLOC_046171	7:63384057-63386684	2.00458	0.02315	0.239051	4.01272	no	1.6324	0.0308	0.220856	3.10028	no	1.62917	1	1	3.09335	no	0.931518	1	1	1.90728	no
ZNF382	XLOC_024782	19:37001594-37119499	2.00375	1	1	4.01041	no	2.26467	1	1	4.80544	no	2.8559	0.00675	0.149999	7.23955	no	1.14139	1	1	2.20593	no
RP11-173A8.2	XLOC_014756	14:75119879-75179818	2.00347	1	1	4.00963	no	2.62512	1	1	6.16936	no	3.13949	0.32695	0.871954	8.81213	no	2.45904	1	1	5.49851	no
RP11-47G11.2	XLOC_007140	10:125763819-125764344	2.00315	1	1	4.00874	no	2.25369	1	1	4.76901	no	1.94037	1	1	3.83804	no	1.16987	1	1	2.24991	no
AC005071.2	XLOC_045129	7:99998448-100031741	2.0026	1	1	4.00722	no	1.49191	1	1	2.81261	no	2.14258	1	1	4.41551	no	3.0007	0.3776	0.999777	8.00388	no
KCNJ4	XLOC_033379	22:38820292-38851205	2.00168	1	1	4.00466	no	3.21489	0.015	0.129619	9.28492	no	-0.00179558	1	1	0.998756	no	-0.383159	1	1	0.766757	no
RP11-1148L6.5	XLOC_058196	X:48431481-48439545	2.00146	0.4762	0.97	4.00405	no	1.56171	0.5703	0.966401	2.95204	no	1.58489	1	1	2.99985	no	1.70741	0.49855	0.999777	3.26574	no
KRT16P1	XLOC_020587	17:18330174-18379234	2.00043	0.0209	0.224137	4.00119	no	2.92576	0.00185	0.0255839	7.59874	yes	1.23033	1	1	2.34621	no	-0.667854	1	1	0.629442	no
-	XLOC_021967	17:20352707-20603227	1.99976	1	1	3.99933	no	2.26373	0.4282	0.896062	4.80231	no	1.31883	1	1	2.49464	no	0.939794	1	1	1.91825	no
-	XLOC_009741	11:76294137-76294428	1.99856	0.355	0.909885	3.99601	no	3.29087	0.22775	0.708159	9.78702	no	2.47552	0.2802	0.839256	5.56168	no	2.07056	1	1	4.2005	no
AC005077.12,AC005077.14,AC005077.7,AC005077.9	XLOC_046311	7:75700268-75761505	1.9973	0.0057	0.0923426	3.99252	no	2.81274	5e-05	0.00116756	7.02618	yes	0.813566	0.3369	0.875738	1.75755	no	-0.0988083	1	1	0.933804	no
AK7	XLOC_014920	14:96858447-96955764	1.99532	0.0207	0.22315	3.98705	no	1.85879	0.0151	0.130335	3.62703	no	1.07022	1	1	2.09975	no	-0.990521	1	1	0.503296	no
CACTIN-AS1	XLOC_024169	19:3607244-3626813	1.9917	1	1	3.97705	no	1.36151	1	1	2.56954	no	0.696293	1	1	1.62034	no	1.54116	1	1	2.91028	no
TDRD5	XLOC_001949	1:179560747-179660407	1.98728	1	1	3.96489	no	0.471471	1	1	1.38652	no	-0.784427	1	1	0.580583	no	0.912539	1	1	1.88236	no
SYNPO2	XLOC_037238	4:119809995-119982402	1.98546	1	1	3.95989	no	1.88321	1	1	3.68895	no	2.34183	1	1	5.06945	no	1.87401	1	1	3.6655	no
C1orf168	XLOC_003380	1:57184476-57285369	1.98322	1	1	3.95375	no	1.25307	1	1	2.38348	no	0.129026	1	1	1.09356	no	-0.700627	1	1	0.615305	no
NR2E1	XLOC_042538	6:108487261-108510013	1.98091	1	1	3.94742	no	3.52603	1	1	11.5197	no	3.17032	1	1	9.00246	no	2.92167	1	1	7.57723	no
RP4-765C7.2	XLOC_001928	1:178060642-178449081	1.98075	0.5101	0.982081	3.94698	no	0.172347	1	1	1.12689	no	0.0122123	1	1	1.0085	no	0.904139	1	1	1.87143	no
LINC00202	XLOC_006358	10:27220134-27230930	1.98063	0.0122	0.157446	3.94665	no	3.12924	0.00025	0.00470905	8.74974	yes	0.879023	1	1	1.83913	no	0.0464027	1	1	1.03269	no
MYBPC3	XLOC_009210	11:47352956-47374253	1.97946	1	1	3.94345	no	2.22337	1	1	4.66983	no	#N/A	#N/A	#N/A	#N/A	#N/A	-1.27156	1	1	0.414212	no
-	XLOC_003491	1:73152590-73153602	1.97752	1	1	3.93816	no	1.87375	1	1	3.66484	no	1.70342	1	1	3.25672	no	0.937047	1	1	1.91461	no
RBP3	XLOC_006549	10:48381486-48390991	1.9768	1	1	3.93619	no	4.01092	1	1	16.1216	no	-0.269183	1	1	0.829789	no	0.0779225	1	1	1.0555	no
KRT7	XLOC_010782	12:52626303-52715182	1.9761	0.0048	0.0826686	3.93428	no	2.22957	0.00185	0.0255839	4.68994	yes	0.822248	0.21265	0.786018	1.76816	no	0.515742	0.4966	0.999777	1.42973	no
MFSD7	XLOC_037682	4:666224-683230	1.97411	1	1	3.92886	no	3.36803	1	1	10.3247	no	1.70721	1	1	3.26529	no	1.11085	1	1	2.15973	no
SLC24A1	XLOC_016787	15:65903703-66184329	1.97197	0.01755	0.198978	3.92303	no	2.30591	0.00645	0.0689879	4.94479	no	1.44304	0.0621	0.49906	2.71893	no	0.902225	0.25055	0.999777	1.86895	no
DNAJC22	XLOC_010714	12:49740622-49751309	1.96766	0.02665	0.262633	3.91133	no	3.44497	0.00055	0.00932622	10.8903	yes	0.505379	1	1	1.4195	no	0.118212	1	1	1.08539	no
IDO1	XLOC_047369	8:39759793-39873910	1.96681	1	1	3.90903	no	2.23845	1	1	4.7189	no	3.25257	1	1	9.53062	no	0.298841	1	1	1.23016	no
RP11-114H24.1	XLOC_016930	15:78187025-78197016	1.96527	1	1	3.90486	no	3.12292	1	1	8.71149	no	0.966177	1	1	1.95366	no	-0.358249	1	1	0.780111	no
DIO3	XLOC_015073	14:102027687-102029789	1.96474	0.00315	0.0610872	3.90342	no	2.04153	0.00205	0.0278957	4.11682	yes	-0.287189	1	1	0.819497	no	-0.314516	1	1	0.804121	no
AC074289.1	XLOC_027059	2:64319785-64479993	1.96264	1	1	3.89775	no	1.08144	1	1	2.11615	no	#N/A	#N/A	#N/A	#N/A	#N/A	#N/A	#N/A	#N/A	#N/A	#N/A
LRRC16B	XLOC_014344	14:24521205-24538937	1.96151	1	1	3.89469	no	1.6266	1	1	3.08784	no	2.49893	1	1	5.65266	no	2.60555	1	1	6.08623	no
-	XLOC_043327	6:31820677-31821039	1.96129	0.0944	0.547369	3.8941	no	0.17702	0.8775	0.996063	1.13055	no	0.357557	0.7689	0.994059	1.28125	no	#N/A	#N/A	#N/A	#N/A	#N/A
CPA5	XLOC_045365	7:129984629-130008571	1.95994	0.0178	0.200868	3.89046	no	2.75404	0.00345	0.0422819	6.74604	yes	0.703996	1	1	1.62901	no	-0.960435	1	1	0.513902	no
ODF3L1	XLOC_016906	15:76016317-76055662	1.95948	0.04795	0.37886	3.88922	no	3.64704	0.00315	0.0390115	12.5276	yes	-0.107553	1	1	0.928161	no	-1.66712	1	1	0.314881	no
TMPRSS3	XLOC_032321	21:43791998-43816955	1.95788	0.24615	0.804758	3.88491	no	2.47476	0.22155	0.702156	5.55875	no	0.625751	1	1	1.54301	no	-1.09742	1	1	0.467352	no
OVGP1	XLOC_003771	1:111956935-111970399	1.95775	1	1	3.88456	no	1.24854	1	1	2.37601	no	0.871158	1	1	1.82913	no	1.55916	1	1	2.94682	no
RP11-535A19.1,RP11-535A19.2	XLOC_009729	11:75479777-75855266	1.9574	0.0835	0.512949	3.88361	no	2.22876	0.0424	0.274999	4.68731	no	0.24211	0.8397	0.994059	1.18272	no	-0.182426	0.8768	0.999777	0.88122	no
CCDC144C	XLOC_020639	17:19912656-20306870	1.95655	1	1	3.88133	no	1.3335	1	1	2.52013	no	0.418487	1	1	1.33653	no	1.04005	1	1	2.0563	no
-	XLOC_014041	13:109882911-109885308	1.95398	1	1	3.87442	no	0.844756	1	1	1.79596	no	1.76251	1	1	3.39288	no	0.977841	1	1	1.96952	no
-	XLOC_031963	21:44822586-44823612	1.95269	1	1	3.87096	no	3.01726	1	1	8.09628	no	-0.28264	1	1	0.822085	no	#N/A	#N/A	#N/A	#N/A	#N/A
IMPG1	XLOC_042366	6:76630831-76782395	1.94457	1	1	3.84923	no	1.10317	1	1	2.14826	no	0.987267	1	1	1.98243	no	0.765893	1	1	1.70042	no
-	XLOC_004181	1:156610246-156611068	1.94328	1	1	3.84579	no	3.08681	1	1	8.49615	no	1.80399	1	1	3.49185	no	#N/A	#N/A	#N/A	#N/A	#N/A
MUC12	XLOC_045149	7:100612903-100662230	1.94071	0.039	0.335242	3.83895	no	3.39823	0.00605	0.065861	10.5431	no	-0.902261	1	1	0.535048	no	0.565233	1	1	1.47963	no
ZG16	XLOC_018546	16:29789560-29793096	1.93834	1	1	3.83264	no	2.92863	1	1	7.61387	no	0.342093	1	1	1.26759	no	0.605294	1	1	1.52129	no
RP11-488C13.1	XLOC_015774	14:77352719-77353093	1.93751	0.32865	0.885336	3.83044	no	0.845738	1	1	1.79718	no	#N/A	#N/A	#N/A	#N/A	#N/A	#N/A	#N/A	#N/A	#N/A	#N/A
SOX30	XLOC_041376	5:157052686-157098488	1.93666	1	1	3.82818	no	1.19162	1	1	2.28409	no	0.785586	1	1	1.72379	no	0.428763	1	1	1.34608	no
FAM49A	XLOC_028641	2:16730726-16847599	1.93579	0.01715	0.196134	3.82588	no	1.5491	0.03965	0.263215	2.92635	no	1.99984	0.0119	0.206153	3.99956	no	0.5681	1	1	1.48257	no
VWF	XLOC_011634	12:6058039-6233936	1.93569	1	1	3.82561	no	2.47022	1	1	5.54128	no	1.47449	1	1	2.77885	no	-0.916932	1	1	0.529634	no
-	XLOC_000075	1:2471563-2472230	1.93107	1	1	3.81338	no	4.36219	0.2032	0.680131	20.566	no	#N/A	#N/A	#N/A	#N/A	#N/A	0.0394798	1	1	1.02774	no
CTC-573N18.1	XLOC_040193	5:179868558-179870238	1.93092	1	1	3.81298	no	0.994827	1	1	1.99284	no	1.79682	1	1	3.47454	no	0.700962	1	1	1.62559	no
IL21R-AS1	XLOC_019605	16:27413482-27464714	1.92948	1	1	3.80918	no	3.12406	0.00725	0.075077	8.71838	no	0.00862961	1	1	1.006	no	-0.281897	1	1	0.822509	no
RPS20P33	XLOC_015153	14:105675622-105864484	1.92838	0.47025	0.968276	3.80628	no	1.53794	0.5551	0.960762	2.9038	no	0.941579	1	1	1.92063	no	1.90102	0.5026	0.999777	3.73477	no
MST1L	XLOC_002857	1:17081404-17096732	1.9278	0.01165	0.151565	3.80475	no	1.32366	0.07125	0.387956	2.503	no	0.786587	0.2562	0.819299	1.72499	no	0.403443	0.6175	0.999777	1.32266	no
SHD	XLOC_024183	19:4278597-4290721	1.92651	1	1	3.80135	no	2.54422	0.2583	0.745862	5.83293	no	-0.802024	1	1	0.573544	no	0.0283207	1	1	1.01982	no
-	XLOC_046988	7:157078901-157086413	1.92606	0.2754	0.832472	3.80016	no	0.487151	1	1	1.40167	no	-0.00836745	1	1	0.994217	no	-1.58688	1	1	0.332891	no
CTD-2521M24.5	XLOC_025804	19:17502237-17503093	1.92381	1	1	3.79424	no	1.90456	1	1	3.74395	no	1.84492	1	1	3.59233	no	1.69035	1	1	3.22735	no
-	XLOC_031975	21:45573109-45574087	1.92345	1	1	3.79329	no	2.73027	1	1	6.6358	no	-0.511436	1	1	0.701524	no	-0.681053	1	1	0.62371	no
-	XLOC_046978	7:156735136-156736363	1.92298	1	1	3.79206	no	3.22196	0.1096	0.494493	9.33054	no	-1.01932	1	1	0.493349	no	1.57887	1	1	2.98736	no
CLDN9	XLOC_018258	16:3053431-3072384	1.92221	0.3689	0.920083	3.79003	no	3.25395	0.2635	0.750509	9.53974	no	-0.317705	0.8826	0.994059	0.802345	no	-0.586626	0.81345	0.999777	0.665898	no
DACT3	XLOC_026291	19:47150868-47221152	1.92192	0.2055	0.765834	3.78927	no	2.7284	0.1268	0.53738	6.6272	no	0.0964416	1	1	1.06913	no	-1.1194	1	1	0.460285	no
CTB-79E8.2	XLOC_041466	5:172068225-172124723	1.92049	0.36155	0.916142	3.78552	no	2.56732	0.28915	0.779423	5.92707	no	1.86924	0.56735	0.972502	3.6534	no	1.86493	0.4011	0.999777	3.6425	no
INHBE	XLOC_010913	12:57846105-57914300	1.91862	1	1	3.78061	no	3.56059	0.018	0.148656	11.799	no	1.49146	1	1	2.81173	no	1.50184	1	1	2.83204	no
RP11-64D22.2	XLOC_034626	3:150803483-151645995	1.91812	1	1	3.7793	no	-0.242463	1	1	0.845301	no	#N/A	#N/A	#N/A	#N/A	#N/A	1.77372	1	1	3.41935	no
LPO	XLOC_021262	17:56282802-56345879	1.91254	1	1	3.76471	no	2.02691	1	1	4.07531	no	-0.123279	1	1	0.918099	no	0.157531	1	1	1.11538	no
SOX10	XLOC_033369	22:38301663-38437113	1.91201	1	1	3.76333	no	0.113356	1	1	1.08174	no	0.956022	1	1	1.93995	no	-0.273416	1	1	0.827358	no
RHBG	XLOC_001658	1:156339002-156355011	1.91059	1	1	3.75963	no	3.50751	5e-05	0.00116756	11.3728	yes	-0.664445	1	1	0.630931	no	0.596896	1	1	1.51246	no
ADAMTS9	XLOC_035497	3:64501332-64997143	1.9105	1	1	3.75939	no	2.14824	1	1	4.43287	no	-1.63533	1	1	0.321897	no	#N/A	#N/A	#N/A	#N/A	#N/A
SPIN2A	XLOC_058313	X:57160962-57164058	1.91005	1	1	3.75822	no	1.33873	1	1	2.52929	no	0.746894	1	1	1.67818	no	1.07479	1	1	2.10642	no
KRT33B	XLOC_022333	17:39519745-39526052	1.90897	1	1	3.75541	no	2.31343	0.0311	0.221656	4.97063	no	1.04369	1	1	2.06149	no	0.296051	1	1	1.22778	no
CTD-2562J17.7	XLOC_008231	11:74971170-75062873	1.9068	1	1	3.74976	no	2.82423	0.50755	0.943024	7.08236	no	#N/A	#N/A	#N/A	#N/A	#N/A	0.0188317	1	1	1.01314	no
PHOSPHO1	XLOC_022534	17:47300680-47308128	1.90427	0.0087	0.124864	3.74319	no	2.72809	0.0002	0.00389186	6.62578	yes	-0.170802	1	1	0.888349	no	-0.534031	1	1	0.690622	no
-	XLOC_033319	22:35067659-35080576	1.90216	1	1	3.73772	no	1.5469	1	1	2.92189	no	1.88066	1	1	3.68243	no	1.15305	1	1	2.22384	no
-	XLOC_051520	9:137514708-137516805	1.9018	1	1	3.73679	no	2.40528	0.004	0.0477223	5.29738	yes	-1.19407	1	1	0.437068	no	-0.460716	1	1	0.726626	no
MGAM	XLOC_045468	7:141607612-141806547	1.90179	1	1	3.73677	no	2.51733	1	1	5.72522	no	1.38384	1	1	2.60962	no	1.57184	1	1	2.97284	no
RP11-317J10.2	XLOC_048824	8:86239836-86393693	1.90073	1	1	3.73402	no	0.441871	1	1	1.35836	no	2.79214	1	1	6.92656	no	1.64764	1	1	3.13321	no
-	XLOC_058106	X:39810058-39814182	1.90022	0.1223	0.617993	3.7327	no	0.686327	1	1	1.60918	no	0.528154	1	1	1.44208	no	-1.78531	1	1	0.290114	no
NGEF	XLOC_030333	2:233562008-233880595	1.8989	1	1	3.72929	no	1.91153	1	1	3.76208	no	1.42285	1	1	2.68115	no	1.25124	1	1	2.38046	no
-	XLOC_046039	7:44909907-44910679	1.89574	1	1	3.72113	no	1.09168	1	1	2.13122	no	-0.0139856	1	1	0.990353	no	1.31304	1	1	2.48465	no
MIR203	XLOC_015121	14:104583545-104585294	1.89529	0.0206	0.222569	3.71997	no	1.84737	0.0157	0.133406	3.59844	no	0.688265	0.4358	0.935694	1.61134	no	0.106957	1	1	1.07695	no
-	XLOC_006327	10:21581315-21583516	1.89363	1	1	3.71569	no	1.14219	1	1	2.20716	no	0.860029	1	1	1.81507	no	0.97853	1	1	1.97046	no
CCDC148	XLOC_029768	2:159023161-159313265	1.89333	1	1	3.71492	no	1.38175	1	1	2.60584	no	1.17656	1	1	2.26037	no	3.61844	1	1	12.2817	no
KCNH7	XLOC_029799	2:163175349-163695240	1.89183	1	1	3.71106	no	-0.576558	1	1	0.670562	no	#N/A	#N/A	#N/A	#N/A	#N/A	#N/A	#N/A	#N/A	#N/A	#N/A
C21orf67	XLOC_032006	21:46352610-46359828	1.89021	0.20325	0.76315	3.70689	no	2.19786	0.14335	0.573263	4.58798	no	1.75779	0.21795	0.791206	3.3818	no	0.372399	1	1	1.2945	no
-	XLOC_038238	4:87740040-87741476	1.88877	1	1	3.70319	no	2.20513	1	1	4.61116	no	0.390419	1	1	1.31077	no	-0.155407	1	1	0.897879	no
KCNK7	XLOC_009515	11:65360325-65363467	1.88673	0.00675	0.104218	3.69796	no	2.24677	0.0015	0.0215828	4.74619	yes	-0.245249	1	1	0.84367	no	-1.08777	1	1	0.470488	no
CTD-2651B20.3	XLOC_017526	15:45543883-45571449	1.88517	1	1	3.69396	no	1.43739	1	1	2.7083	no	-0.0871178	1	1	0.941402	no	-1.28846	1	1	0.409388	no
ROCK1P1	XLOC_022985	18:112366-120739	1.88188	0.03615	0.318697	3.68555	no	1.26814	0.1169	0.513641	2.40851	no	2.02408	0.0273	0.333132	4.06732	no	1.90801	0.03935	0.590634	3.75291	no
GRIP2	XLOC_035081	3:14444075-14583588	1.87979	1	1	3.68021	no	2.08921	1	1	4.25515	no	1.09862	1	1	2.1415	no	0.785851	1	1	1.72411	no
CTD-2083E4.5	XLOC_040227	5:271735-438406	1.87744	1	1	3.67423	no	0.104476	1	1	1.0751	no	0.58338	1	1	1.49836	no	0.106995	1	1	1.07698	no
AC008280.3	XLOC_028940	2:54091203-54307601	1.87697	0.5241	0.984917	3.67303	no	0.186721	1	1	1.13817	no	#N/A	#N/A	#N/A	#N/A	#N/A	0.0592552	1	1	1.04193	no
-	XLOC_013329	13:88346749-88347500	1.87654	1	1	3.67193	no	1.32682	1	1	2.50849	no	0.447743	1	1	1.3639	no	0.770137	1	1	1.70543	no
SH3GL2	XLOC_049410	9:17579079-17797127	1.87584	1	1	3.67015	no	0.470832	1	1	1.38591	no	#N/A	#N/A	#N/A	#N/A	#N/A	4.03359	1	1	16.3769	no
-	XLOC_000347	1:22489852-22604228	1.86843	0.31245	0.868771	3.65135	no	1.43136	0.46025	0.9178	2.69701	no	0.782364	1	1	1.71995	no	-0.224663	1	1	0.855795	no
RSPH1	XLOC_032323	21:43892595-44001550	1.86799	0.31055	0.866653	3.65024	no	3.19746	0.06405	0.362563	9.17342	no	-1.62336	1	1	0.324579	no	-0.669499	1	1	0.628725	no
LUZP2	XLOC_007551	11:24518515-25104150	1.86789	1	1	3.64998	no	1.89672	1	1	3.72366	no	0.885938	1	1	1.84797	no	3.15342	1	1	8.89762	no
CNTFR	XLOC_050707	9:34551429-34590248	1.86774	0.0103	0.139392	3.6496	no	2.97255	0.00025	0.00470905	7.84922	yes	-0.724702	1	1	0.605122	no	0.236815	1	1	1.17839	no
BHLHE41	XLOC_011866	12:26272958-26986131	1.86761	0.0854	0.519367	3.64928	no	1.75123	0.0434	0.279143	3.36645	no	1.27341	0.2082	0.782494	2.41732	no	1.15412	0.31615	0.999777	2.22549	no
RP4-800M22.1	XLOC_003323	1:52607744-52831865	1.8662	1	1	3.64571	no	-0.823507	1	1	0.565067	no	2.67475	0.40495	0.920848	6.38528	no	#N/A	#N/A	#N/A	#N/A	#N/A
-	XLOC_050038	9:103154520-103155906	1.86389	0.0509	0.391686	3.63988	no	1.25367	1	1	2.38447	no	1.16342	1	1	2.23988	no	-0.0620753	1	1	0.957885	no
FAM57B	XLOC_019660	16:30034654-30064299	1.86261	1	1	3.63665	no	3.27201	0.19645	0.670393	9.65991	no	-0.215436	1	1	0.861286	no	1.2839	1	1	2.43496	no
MYBPHL	XLOC_003735	1:109834986-109849663	1.86221	1	1	3.63564	no	2.87514	0.2488	0.734066	7.33674	no	-0.786067	1	1	0.579923	no	-1.56902	1	1	0.337037	no
-	XLOC_014038	13:109874519-109875932	1.86135	1	1	3.63348	no	-1.11049	1	1	0.463137	no	1.60472	1	1	3.04137	no	0.213572	1	1	1.15956	no
C5orf56	XLOC_039726	5:131746327-131811736	1.85838	0.0145	0.177172	3.626	no	1.39834	0.0342	0.237552	2.63598	no	2.30771	0.00235	0.0795398	4.95097	no	1.75945	0.0304	0.527111	3.38569	no
-	XLOC_006789	10:81078468-81080165	1.8564	1	1	3.62103	no	2.5382	0.0065	0.0693288	5.80864	no	#N/A	#N/A	#N/A	#N/A	#N/A	-2.67136	1	1	0.156979	no
-	XLOC_034847	3:184455336-184456592	1.85604	1	1	3.62013	no	2.48734	0.25865	0.745862	5.60743	no	#N/A	#N/A	#N/A	#N/A	#N/A	#N/A	#N/A	#N/A	#N/A	#N/A
ABCG4	XLOC_008577	11:119019721-119033360	1.85321	0.00825	0.120194	3.61303	no	2.32029	0.00025	0.00470905	4.99433	yes	-0.0636051	1	1	0.95687	no	0.146339	1	1	1.10676	no
FCGR2A	XLOC_001757	1:161475219-161493803	1.85308	1	1	3.61271	no	1.46922	1	1	2.76872	no	-1.69617	1	1	0.308604	no	1.35558	1	1	2.559	no
RP1-197B17.3	XLOC_010678	12:48099867-48231681	1.85148	0.07645	0.485297	3.6087	no	1.2146	0.22335	0.704131	2.32076	no	0.315599	1	1	1.24453	no	-0.264314	1	1	0.832595	no
-	XLOC_032346	21:44808912-44812356	1.84889	1	1	3.60223	no	2.81676	0.00105	0.0160758	7.04578	yes	-0.380033	1	1	0.76842	no	-0.190428	1	1	0.876346	no
SERPINA10	XLOC_015893	14:94749649-94759608	1.84875	1	1	3.60188	no	0.0944873	1	1	1.06769	no	1.89322	1	1	3.71463	no	0.699697	1	1	1.62416	no
AC130352.1	XLOC_048275	8:12029710-12424423	1.84821	1	1	3.60053	no	1.32194	1	1	2.50002	no	1.38327	1	1	2.60859	no	-1.01084	1	1	0.496257	no
-	XLOC_009626	11:70115340-70116586	1.84777	1	1	3.59943	no	2.76368	0.02465	0.186368	6.79126	no	0.0556254	1	1	1.03931	no	1.40652	1	1	2.65097	no
PLB1	XLOC_026833	2:28680011-28887406	1.8476	0.0035	0.0661889	3.59901	no	2.54991	0.00015	0.00305086	5.85598	yes	0.0644797	1	1	1.04571	no	1.25102	1	1	2.3801	no
RP3-449M8.6	XLOC_015741	14:74940709-74941567	1.84738	1	1	3.59846	no	0.175575	1	1	1.12941	no	1.38645	1	1	2.61435	no	1.84634	1	1	3.59587	no
RP11-727F15.11	XLOC_009442	11:62538591-62559493	1.84701	1	1	3.59754	no	0.492726	1	1	1.4071	no	2.27654	1	1	4.84515	no	1.90435	1	1	3.7434	no
COL6A3	XLOC_030362	2:238232645-238323018	1.84393	1	1	3.58987	no	2.58848	1	1	6.01465	no	-0.426746	1	1	0.743938	no	2.56575	1	1	5.92063	no
RP11-266L9.4,RP11-266L9.7	XLOC_018494	16:25043201-25069430	1.84255	1	1	3.58643	no	1.98025	1	1	3.94561	no	2.73614	1	1	6.66285	no	#N/A	#N/A	#N/A	#N/A	#N/A
RP11-656D10.3	XLOC_003182	1:40942886-40974333	1.84139	1	1	3.58355	no	2.96666	0.48285	0.931394	7.81724	no	0.500911	1	1	1.41511	no	2.31835	1	1	4.98761	no
CTD-2545M3.8	XLOC_026390	19:50990066-50990895	1.8407	1	1	3.58184	no	2.47665	1	1	5.56604	no	1.98993	1	1	3.97218	no	-0.00495301	1	1	0.996573	no
-	XLOC_004520	1:189902417-189904599	1.84065	1	1	3.58171	no	4.18626	0.2251	0.705983	18.205	no	1.00306	1	1	2.00425	no	-1.40807	1	1	0.376815	no
PAEP	XLOC_050388	9:138453601-138458801	1.83942	1	1	3.57866	no	3.40947	0.1931	0.666245	10.6256	no	#N/A	#N/A	#N/A	#N/A	#N/A	#N/A	#N/A	#N/A	#N/A	#N/A
DUSP13	XLOC_006760	10:76854189-76941881	1.83886	1	1	3.57727	no	4.1119	5e-05	0.00116756	17.2904	yes	#N/A	#N/A	#N/A	#N/A	#N/A	#N/A	#N/A	#N/A	#N/A	#N/A
-	XLOC_032330	21:44257953-44258664	1.83844	1	1	3.57623	no	1.15412	1	1	2.22549	no	0.263821	1	1	1.20065	no	1.80264	1	1	3.48858	no
RP11-94C24.8	XLOC_022570	17:48609903-48633213	1.8383	1	1	3.57588	no	1.32264	1	1	2.50123	no	#N/A	#N/A	#N/A	#N/A	#N/A	0.319097	1	1	1.24755	no
CKMT1A	XLOC_016569	15:43825659-44010458	1.83827	0.06475	0.449275	3.57581	no	1.83184	0.0623	0.356616	3.55991	no	1.70843	0.0719	0.533132	3.26805	no	0.778299	0.55805	0.999777	1.71511	no
CTC-559E9.6	XLOC_024551	19:19868119-19945736	1.83728	1	1	3.57336	no	0.890142	1	1	1.85336	no	2.3815	1	1	5.21078	no	1.47178	1	1	2.77364	no
GALR2	XLOC_021465	17:74035183-74117657	1.83679	0.4324	0.951846	3.57214	no	3.20151	0.3703	0.854103	9.19921	no	-0.905933	1	1	0.533687	no	-0.370927	1	1	0.773285	no
AC000089.3	XLOC_032485	22:19744225-19842462	1.8367	1	1	3.57192	no	-0.244457	1	1	0.844133	no	0.492631	1	1	1.40701	no	#N/A	#N/A	#N/A	#N/A	#N/A
-	XLOC_057897	X:2484093-2527236	1.83553	1	1	3.56902	no	1.40252	1	1	2.64363	no	-1.2825	1	1	0.411083	no	1.484	1	1	2.79723	no
AC023271.1	XLOC_030082	2:203879590-204091101	1.83341	1	1	3.56378	no	#N/A	#N/A	#N/A	#N/A	#N/A	0.486791	1	1	1.40132	no	0.980517	1	1	1.97317	no
PNPLA5	XLOC_033476	22:44275220-44287893	1.83317	1	1	3.56319	no	4.62858	0.20895	0.68655	24.7367	no	-0.912219	1	1	0.531367	no	#N/A	#N/A	#N/A	#N/A	#N/A
ASS1P2	XLOC_028828	2:39024870-39103075	1.8325	1	1	3.56154	no	0.475626	1	1	1.39052	no	0.48517	1	1	1.39975	no	1.15879	1	1	2.2327	no
RP11-452H21.4	XLOC_009771	11:77926311-78285919	1.8307	1	1	3.5571	no	1.15622	1	1	2.22873	no	#N/A	#N/A	#N/A	#N/A	#N/A	0.318803	1	1	1.2473	no
SPATC1	XLOC_048074	8:145051320-145101933	1.83027	1	1	3.55604	no	-0.867883	1	1	0.54795	no	0.481205	1	1	1.39591	no	#N/A	#N/A	#N/A	#N/A	#N/A
PRSS36	XLOC_019706	16:31150245-31161415	1.83014	1	1	3.55572	no	1.92326	1	1	3.79279	no	1.03294	1	1	2.04619	no	-2.19618	1	1	0.218215	no
ZNF214	XLOC_008928	11:7020548-7041599	1.82906	1	1	3.55305	no	0.130489	1	1	1.09466	no	#N/A	#N/A	#N/A	#N/A	#N/A	1.68185	1	1	3.20839	no
P2RX1	XLOC_021690	17:3799885-3819794	1.82889	1	1	3.55264	no	0.471226	1	1	1.38629	no	#N/A	#N/A	#N/A	#N/A	#N/A	1.73878	1	1	3.33753	no
LRP2BP	XLOC_038845	4:186079875-186317053	1.82842	1	1	3.55148	no	1.67394	1	1	3.19085	no	1.41536	1	1	2.66726	no	1.11953	1	1	2.17276	no
RP11-863P13.4	XLOC_020249	16:87982849-88152028	1.82819	1	1	3.55091	no	4.05543	1	1	16.6267	no	0.477479	1	1	1.39231	no	#N/A	#N/A	#N/A	#N/A	#N/A
AC079210.1	XLOC_021383	17:66255322-66760023	1.82811	1	1	3.55072	no	1.42204	1	1	2.67964	no	0.412898	1	1	1.33136	no	0.96988	1	1	1.95868	no
RIMS4	XLOC_031494	20:43380448-43438979	1.82803	1	1	3.55052	no	2.38232	1	1	5.21374	no	#N/A	#N/A	#N/A	#N/A	#N/A	0.950822	1	1	1.93297	no
MYOZ1	XLOC_006738	10:75391411-75401515	1.8259	1	1	3.54528	no	3.70772	0.25935	0.746347	13.0658	no	-1.02095	1	1	0.492792	no	#N/A	#N/A	#N/A	#N/A	#N/A
RIMBP3	XLOC_033105	22:20455668-20461786	1.82572	1	1	3.54484	no	0.621333	1	1	1.5383	no	-1.15179	1	1	0.450066	no	0.194899	1	1	1.14464	no
-	XLOC_012802	12:123894902-123895671	1.82485	1	1	3.5427	no	1.96127	1	1	3.89405	no	-1.1585	1	1	0.447978	no	1.4381	1	1	2.70964	no
PCDHB13	XLOC_039858	5:140593508-140596993	1.82269	1	1	3.5374	no	1.97083	1	1	3.91994	no	0.637378	1	1	1.5555	no	1.07313	1	1	2.10399	no
LPHN3	XLOC_036867	4:62066975-63031272	1.8215	1	1	3.53448	no	1.33404	1	1	2.52108	no	0.232094	1	1	1.17454	no	#N/A	#N/A	#N/A	#N/A	#N/A
LCK	XLOC_000522	1:32716839-32751766	1.82136	1	1	3.53414	no	2.43554	0.0001	0.00213617	5.40967	yes	0.736486	1	1	1.66611	no	0.475111	1	1	1.39003	no
ECT2L	XLOC_042735	6:139117062-139309478	1.82072	1	1	3.53257	no	-0.313579	1	1	0.804643	no	0.213302	1	1	1.15934	no	-1.29421	1	1	0.407759	no
RP11-169D4.2	XLOC_008181	11:72287184-72385635	1.82062	0.42185	0.945575	3.53233	no	1.12116	1	1	2.17522	no	0.447893	1	1	1.36405	no	-1.69158	1	1	0.309588	no
RP11-428P16.2	XLOC_005688	10:79490523-79494527	1.82022	1	1	3.53135	no	1.3547	1	1	2.55744	no	#N/A	#N/A	#N/A	#N/A	#N/A	0.0770688	1	1	1.05487	no
RP11-12A20.7	XLOC_049742	9:67792166-67794649	1.8202	1	1	3.5313	no	1.73002	1	1	3.31732	no	1.11651	1	1	2.16822	no	0.934682	1	1	1.91147	no
TPPP	XLOC_040234	5:612386-693510	1.81962	0.00495	0.084249	3.52988	no	2.87886	5e-05	0.00116756	7.35569	yes	-0.0698934	1	1	0.952708	no	-0.484922	1	1	0.714536	no
CD8A	XLOC_029214	2:87011728-87035519	1.81878	1	1	3.52783	no	1.48664	1	1	2.80236	no	1.62702	1	1	3.08874	no	2.05462	1	1	4.15434	no
RP13-726E6.2	XLOC_008820	11:3490548-3602441	1.8165	1	1	3.52226	no	1.46808	1	1	2.76653	no	0.991339	1	1	1.98803	no	#N/A	#N/A	#N/A	#N/A	#N/A
RP11-15N24.4	XLOC_034204	3:99898410-99900574	1.81624	1	1	3.52162	no	1.48444	1	1	2.79809	no	2.58505	1	1	6.00036	no	2.37492	1	1	5.18707	no
EML6	XLOC_026995	2:54950635-55199157	1.81206	0.03795	0.328756	3.51143	no	0.887824	1	1	1.85038	no	0.477931	1	1	1.39274	no	0.114146	1	1	1.08233	no
KRT75	XLOC_012128	12:52801363-52828309	1.8011	1	1	3.48486	no	1.89623	1	1	3.72239	no	0.534993	1	1	1.44894	no	-0.266216	1	1	0.831498	no
KCTD16	XLOC_039886	5:143550395-143856944	1.7992	1	1	3.48027	no	2.19573	1	1	4.58121	no	0.0101067	1	1	1.00703	no	-0.387314	1	1	0.764552	no
SORCS2	XLOC_036499	4:7194264-7744554	1.79441	0.02195	0.231451	3.46874	no	1.96871	5e-05	0.00116756	3.91418	yes	1.27757	0.02005	0.277252	2.4243	no	0.80089	0.2664	0.999777	1.74218	no
RP11-267C16.1	XLOC_023325	18:48872618-49088939	1.79402	1	1	3.4678	no	0.72234	1	1	1.64986	no	0.145596	1	1	1.10619	no	-1.36141	1	1	0.389202	no
SLC34A3	XLOC_050436	9:140125208-140131006	1.79061	1	1	3.45961	no	0.823424	1	1	1.7696	no	0.119721	1	1	1.08652	no	-1.15587	1	1	0.448795	no
SNCG	XLOC_005755	10:88695296-88784489	1.78805	0.046	0.369097	3.45348	no	2.33375	0.00845	0.0843621	5.04114	no	0.00531484	0.9939	0.999071	1.00369	no	-0.59566	0.44255	0.999777	0.661742	no
SCARNA5	XLOC_028423	2:234118696-234204320	1.78758	0.5734	0.998065	3.45235	no	#N/A	#N/A	#N/A	#N/A	#N/A	0.607552	1	1	1.52367	no	-0.109482	1	1	0.926921	no
C21orf67	XLOC_032007	21:46352610-46359828	1.78663	1	1	3.45008	no	2.4245	0.07065	0.385788	5.36843	no	1.24917	1	1	2.37705	no	0.461569	1	1	1.37704	no
ROR2	XLOC_051093	9:94325372-94712444	1.78663	1	1	3.45008	no	3.97926	0.0002	0.00389186	15.7716	yes	1.13605	1	1	2.19778	no	1.04939	1	1	2.06965	no
RP11-367J11.3,RP11-367J11.4	XLOC_037756	4:7096297-7105112	1.78119	1	1	3.4371	no	0.123284	1	1	1.08921	no	-1.49143	1	1	0.35566	no	-0.147615	1	1	0.902742	no
-	XLOC_042607	6:116569596-116570420	1.77951	1	1	3.4331	no	0.706236	1	1	1.63154	no	1.28071	1	1	2.42959	no	-1.15447	1	1	0.449231	no
RP11-973N13.4	XLOC_015625	14:64854748-65009955	1.77922	1	1	3.43241	no	-1.14364	1	1	0.452616	no	#N/A	#N/A	#N/A	#N/A	#N/A	#N/A	#N/A	#N/A	#N/A	#N/A
-	XLOC_042317	6:71301324-71302370	1.77799	1	1	3.42948	no	-0.0521991	1	1	0.964465	no	0.174017	1	1	1.1282	no	-1.88083	1	1	0.271527	no
NOXRED1	XLOC_015787	14:77860363-77889860	1.77738	1	1	3.42803	no	2.12522	1	1	4.3627	no	-0.125339	1	1	0.916789	no	2.10646	1	1	4.30633	no
RP11-79H23.3	XLOC_047640	8:79578281-79846109	1.77612	1	1	3.42504	no	0.532911	1	1	1.44685	no	2.21376	1	1	4.63883	no	0.227896	1	1	1.17113	no
PDIA2	XLOC_018154	16:333151-337215	1.77079	1	1	3.41241	no	1.17198	1	1	2.25321	no	1.90055	1	1	3.73356	no	0.624385	1	1	1.54155	no
RHBDL1	XLOC_018171	16:691812-818865	1.76755	0.1504	0.675321	3.40475	no	1.62242	0.19565	0.669456	3.07891	no	0.855574	0.4385	0.936009	1.80948	no	0.528341	0.64565	0.999777	1.44227	no
GRIN3B	XLOC_024102	19:999600-1021117	1.76585	0.26095	0.818156	3.40074	no	1.78506	0.27145	0.760408	3.44633	no	0.362068	0.84565	0.994059	1.28527	no	-0.255663	0.8866	0.999777	0.837602	no
DLG2	XLOC_009800	11:83166054-85338966	1.76244	1	1	3.39271	no	-0.216529	1	1	0.860634	no	3.4404	1	1	10.8558	no	1.70517	1	1	3.26067	no
RP11-762H8.1	XLOC_016939	15:78542843-78592136	1.76175	1	1	3.39109	no	1.32479	1	1	2.50496	no	1.82975	1	1	3.55475	no	1.49569	1	1	2.81999	no
SPTBN5	XLOC_017453	15:42120282-42189585	1.76111	1	1	3.38959	no	1.92165	1	1	3.78856	no	1.66785	1	1	3.17741	no	1.73721	1	1	3.3339	no
LRRC26,TMEM210	XLOC_051586	9:140063209-140066861	1.76018	1	1	3.3874	no	2.66125	0.2202	0.699922	6.32581	no	#N/A	#N/A	#N/A	#N/A	#N/A	0.305097	1	1	1.2355	no
RGS9BP	XLOC_024683	19:33087910-33169206	1.75878	1	1	3.38412	no	2.0432	1	1	4.12159	no	0.478244	1	1	1.39305	no	1.7968	1	1	3.47449	no
RP11-203I2.1	XLOC_049717	9:65585691-65661972	1.75866	1	1	3.38384	no	-0.86936	1	1	0.54739	no	1.74944	1	1	3.36228	no	#N/A	#N/A	#N/A	#N/A	#N/A
AQP7P3	XLOC_049657	9:42845767-42876505	1.75864	1	1	3.38379	no	0.715675	1	1	1.64225	no	#N/A	#N/A	#N/A	#N/A	#N/A	#N/A	#N/A	#N/A	#N/A	#N/A
RP11-304F15.4	XLOC_021178	17:47964960-47978257	1.75842	1	1	3.38327	no	1.74063	1	1	3.34181	no	#N/A	#N/A	#N/A	#N/A	#N/A	#N/A	#N/A	#N/A	#N/A	#N/A
RP11-709D24.6	XLOC_019372	16:4666493-4740975	1.75824	1	1	3.38285	no	0.473867	1	1	1.38883	no	#N/A	#N/A	#N/A	#N/A	#N/A	-0.0242581	1	1	0.983326	no
AC129929.5	XLOC_008800	11:2349978-2418627	1.75784	1	1	3.38191	no	1.74489	1	1	3.35169	no	2.89168	1	1	7.42134	no	1.00942	1	1	2.0131	no
RP11-525K10.3	XLOC_020161	16:80099732-80597032	1.75744	1	1	3.38098	no	4.13462	1	1	17.5649	no	1.55289	1	1	2.93404	no	#N/A	#N/A	#N/A	#N/A	#N/A
RP11-3L8.3	XLOC_050530	9:12685438-12822809	1.75703	1	1	3.38002	no	0.480665	1	1	1.39539	no	-0.0145134	1	1	0.989991	no	#N/A	#N/A	#N/A	#N/A	#N/A
RP1-40E16.11	XLOC_042984	6:3118607-3153812	1.75662	1	1	3.37906	no	-0.242159	1	1	0.845479	no	#N/A	#N/A	#N/A	#N/A	#N/A	-0.00871096	1	1	0.99398	no
RP11-697M17.2	XLOC_048756	8:76079938-76088891	1.75524	1	1	3.37582	no	0.973199	1	1	1.96319	no	0.510333	1	1	1.42438	no	0.00710248	1	1	1.00494	no
CTD-2353F22.1	XLOC_040469	5:36606456-36725297	1.75513	1	1	3.37557	no	0.336872	1	1	1.26302	no	-0.00242267	1	1	0.998322	no	0.319399	1	1	1.24781	no
AJ003147.8	XLOC_019336	16:3231232-3234018	1.75491	1	1	3.37505	no	0.76935	1	1	1.7045	no	0.51478	1	1	1.42878	no	0.0122166	1	1	1.0085	no
IFITM4P	XLOC_043240	6:29718505-29718925	1.75461	1	1	3.37435	no	1.49928	1	1	2.82702	no	1.2846	1	1	2.43614	no	#N/A	#N/A	#N/A	#N/A	#N/A
KLHL31	XLOC_043605	6:53512698-53567246	1.75401	1	1	3.37295	no	1.45324	1	1	2.73822	no	2.19628	1	1	4.58296	no	0.503261	1	1	1.41741	no
SEMA6D	XLOC_016614	15:47476297-48066420	1.75226	1	1	3.36886	no	1.67985	1	1	3.20395	no	0.46682	1	1	1.38206	no	0.264242	1	1	1.201	no
PCDHB11	XLOC_039856	5:140579182-140582618	1.75066	1	1	3.36512	no	-0.251967	1	1	0.839751	no	-0.801658	1	1	0.573689	no	#N/A	#N/A	#N/A	#N/A	#N/A
RP11-42I10.1	XLOC_018746	16:48657346-48778553	1.74869	0.07655	0.485297	3.36053	no	2.28064	0.02785	0.204693	4.85893	no	0.502932	1	1	1.41709	no	-0.730558	1	1	0.602671	no
C14orf132	XLOC_014913	14:96505660-96560417	1.74778	0.00685	0.104978	3.35841	no	3.10327	5e-05	0.00116756	8.59364	yes	-0.0895844	1	1	0.939793	no	-0.436329	1	1	0.739013	no
EPO	XLOC_045142	7:100318422-100321323	1.74736	1	1	3.35744	no	2.64414	1	1	6.25123	no	1.22589	1	1	2.339	no	1.06438	1	1	2.09127	no
CITF22-92A6.1	XLOC_032970	22:46409485-46411378	1.74481	1	1	3.35151	no	2.72508	1	1	6.61197	no	0.660415	1	1	1.58054	no	1.58328	1	1	2.9965	no
NXNL2	XLOC_049915	9:91150015-91199189	1.74432	0.01985	0.216732	3.35037	no	1.81758	0.0134	0.11847	3.52489	no	1.38966	1	1	2.62017	no	-0.273048	1	1	0.827569	no
RP11-209D14.2	XLOC_021962	17:19911363-19912547	1.74427	1	1	3.35025	no	1.21771	1	1	2.32577	no	1.66017	1	1	3.16054	no	1.81469	1	1	3.51784	no
C8orf12	XLOC_047101	8:11197145-11332224	1.74383	1	1	3.34923	no	1.88975	1	1	3.70571	no	1.80635	1	1	3.49756	no	1.62697	1	1	3.08864	no
RP1-78O14.1	XLOC_012428	12:79257772-79897176	1.74354	1	1	3.34856	no	1.05708	1	1	2.08072	no	2.15757	1	1	4.46163	no	#N/A	#N/A	#N/A	#N/A	#N/A
RP11-511H9.3	XLOC_012572	12:102139274-102224716	1.74151	1	1	3.34385	no	0.0318133	1	1	1.0223	no	#N/A	#N/A	#N/A	#N/A	#N/A	#N/A	#N/A	#N/A	#N/A	#N/A
KIAA1045	XLOC_049540	9:34957483-34984679	1.74093	1	1	3.34251	no	2.49892	0.01775	0.146908	5.65262	no	0.14733	1	1	1.10752	no	1.29574	1	1	2.45503	no
RUNDC3A	XLOC_021067	17:42376626-42396039	1.74052	0.05115	0.392358	3.34156	no	1.35687	0.0978	0.465417	2.56129	no	1.02872	0.24065	0.805814	2.04021	no	-0.0918169	1	1	0.93834	no
IL12RB1	XLOC_025820	19:18169804-18262498	1.73732	0.0503	0.389973	3.33415	no	1.71497	0.0652	0.367441	3.2829	no	0.772164	0.4528	0.942321	1.70783	no	0.390556	1	1	1.3109	no
SLITRK4	XLOC_058857	X:142710595-142723596	1.73636	1	1	3.33193	no	1.39164	1	1	2.62377	no	1.12199	1	1	2.17647	no	0.649291	1	1	1.5684	no
-	XLOC_032348	21:44875551-44876216	1.73589	1	1	3.33085	no	2.17207	0.13005	0.54667	4.5067	no	1.48819	1	1	2.80537	no	0.172451	1	1	1.12697	no
-	XLOC_009476	11:64017042-64018095	1.73492	0.03115	0.291304	3.32861	no	1.42867	0.0465	0.292562	2.69198	no	0.877929	1	1	1.83774	no	1.03133	0.19615	0.993478	2.04391	no
SAMD5	XLOC_042781	6:147830062-148275073	1.73447	1	1	3.32757	no	2.00838	1	1	4.0233	no	0.672518	1	1	1.59385	no	2.09335	1	1	4.26738	no
RP13-608F4.1	XLOC_016986	15:82804002-82810908	1.73273	1	1	3.32356	no	1.77939	1	1	3.43281	no	1.69605	1	1	3.24013	no	#N/A	#N/A	#N/A	#N/A	#N/A
DOC2GP	XLOC_009573	11:67380123-67383728	1.73263	1	1	3.32333	no	1.51564	1	1	2.85926	no	1.61155	1	1	3.0558	no	0.384056	1	1	1.30501	no
OSGEPL1-AS1	XLOC_028036	2:190539015-190630282	1.73103	1	1	3.31965	no	0.413586	1	1	1.33199	no	1.14148	1	1	2.20607	no	0.587453	1	1	1.50259	no
AC009404.2	XLOC_027586	2:118591512-118599400	1.73027	0.0949	0.548262	3.3179	no	1.02092	1	1	2.02921	no	1.49915	1	1	2.82676	no	1.61683	1	1	3.067	no
PRKCB	XLOC_018484	16:23847321-24231932	1.72912	1	1	3.31526	no	2.84264	5e-05	0.00116756	7.17332	yes	-0.77695	1	1	0.583599	no	0.729943	1	1	1.65857	no
SCN1A	XLOC_029815	2:166813908-167232503	1.72661	1	1	3.30949	no	3.19805	1	1	9.17717	no	#N/A	#N/A	#N/A	#N/A	#N/A	#N/A	#N/A	#N/A	#N/A	#N/A
RP11-20G13.1	XLOC_018103	15:99963747-99975516	1.72453	0.13905	0.651859	3.30472	no	3.22652	0.0291	0.211743	9.36007	no	0.32244	1	1	1.25044	no	-1.6722	1	1	0.313774	no
STARD13-AS2	XLOC_013056	13:33677306-33924767	1.72415	1	1	3.30385	no	0.742734	1	1	1.67334	no	2.06728	1	1	4.19096	no	1.01286	1	1	2.01791	no
ZNF568	XLOC_024789	19:37407230-37489602	1.72327	1	1	3.30184	no	2.45632	1	1	5.48815	no	2.42392	1	1	5.36627	no	1.301	1	1	2.464	no
RP11-328N19.1	XLOC_036759	4:44018877-44024080	1.72285	1	1	3.30088	no	0.951525	1	1	1.93392	no	2.46529	1	1	5.52238	no	3.21408	1	1	9.27971	no
-	XLOC_043046	6:10743570-10744412	1.72201	1	1	3.29896	no	0.864711	1	1	1.82097	no	0.95005	1	1	1.93194	no	0.121207	1	1	1.08764	no
GAS6-AS1	XLOC_013462	13:114518602-114567046	1.72083	1	1	3.29626	no	2.12814	0.4766	0.928236	4.37154	no	-1.59897	1	1	0.330113	no	-1.26591	1	1	0.415837	no
FAM132B,FLJ37034	XLOC_028467	2:239067622-239077541	1.72033	0.0047	0.081823	3.29512	no	1.26255	0.02465	0.186368	2.39919	no	1.01652	1	1	2.02303	no	1.06326	1	1	2.08965	no
PRCD	XLOC_021474	17:74523437-74553765	1.7194	0.00325	0.0623578	3.29299	no	2.83131	5e-05	0.00116756	7.1172	yes	-0.247521	1	1	0.842343	no	0.631741	0.29785	0.999777	1.54943	no
RP11-932O9.7	XLOC_017336	15:30909200-31065334	1.71879	1	1	3.2916	no	1.8839	1	1	3.69071	no	1.89108	1	1	3.70913	no	1.48941	1	1	2.80774	no
LINC00336	XLOC_043383	6:33551514-33561115	1.7183	1	1	3.29048	no	2.56483	1	1	5.91685	no	-1.77933	1	1	0.291319	no	-0.597938	1	1	0.660698	no
AL160314.1	XLOC_015268	14:23064714-23081265	1.71731	1	1	3.28823	no	1.05968	1	1	2.08447	no	0.741389	1	1	1.67178	no	1.527	1	1	2.88186	no
RP11-397J20.1	XLOC_045760	7:7117925-7119373	1.71706	1	1	3.28766	no	1.06021	1	1	2.08524	no	0.226658	1	1	1.17012	no	#N/A	#N/A	#N/A	#N/A	#N/A
-	XLOC_050549	9:14951495-14952779	1.71704	1	1	3.28761	no	1.66448	1	1	3.16999	no	2.67623	1	1	6.39183	no	2.04828	1	1	4.13613	no
AF038458.2	XLOC_024766	19:36438016-36450094	1.71673	1	1	3.28691	no	0.059667	1	1	1.04223	no	0.848407	1	1	1.80051	no	0.484115	1	1	1.39873	no
FCGBP	XLOC_026126	19:40353962-40440533	1.71569	1	1	3.28454	no	2.37046	1	1	5.17106	no	1.11746	1	1	2.16965	no	#N/A	#N/A	#N/A	#N/A	#N/A
RP11-159C21.4	XLOC_003331	1:53192125-53293014	1.71547	0.5079	0.982062	3.28404	no	1.17127	1	1	2.2521	no	1.67006	1	1	3.18228	no	0.542498	1	1	1.45649	no
TMOD2	XLOC_016663	15:52015207-52108565	1.71296	1	1	3.27833	no	1.39853	1	1	2.63633	no	1.84558	1	1	3.59397	no	1.46846	1	1	2.76726	no
RP4-792G4.2	XLOC_003420	1:63786554-63790797	1.71123	0.01095	0.145869	3.2744	no	1.41763	0.0228	0.17765	2.67146	no	0.866086	0.1671	0.728464	1.82271	no	0.143681	0.85045	0.999777	1.10472	no
CLPSL1	XLOC_042075	6:35748793-35761452	1.71066	1	1	3.27311	no	2.88937	0.22725	0.707756	7.40947	no	-1.00823	1	1	0.497156	no	-1.00152	1	1	0.499473	no
AC034243.1	XLOC_041195	5:137946655-138270723	1.7096	1	1	3.2707	no	1.8587	1	1	3.62681	no	0.977393	1	1	1.9689	no	#N/A	#N/A	#N/A	#N/A	#N/A
-	XLOC_032351	21:44903240-44906752	1.70783	1	1	3.26669	no	2.47878	0.00375	0.0452693	5.57426	yes	0.718313	1	1	1.64526	no	-0.513022	1	1	0.700753	no
RBBP8NL	XLOC_031667	20:60985292-61002589	1.70666	0.007	0.106824	3.26404	no	2.08425	0.00135	0.0196837	4.24055	yes	-0.151096	1	1	0.900566	no	0.00877806	1	1	1.0061	no
-	XLOC_015302	14:24052808-24053513	1.70257	0.08475	0.518207	3.2548	no	2.88108	0.01105	0.103244	7.36701	no	1.98298	0.0681	0.520326	3.95309	no	1.36147	0.17405	0.969167	2.56947	no
NHSL2	XLOC_057255	X:71130710-71381600	1.70228	1	1	3.25415	no	2.3178	0.0142	0.124321	4.98571	no	1.17799	1	1	2.26261	no	0.834343	1	1	1.78304	no
AP000889.3,ELMOD1	XLOC_008449	11:107461816-107537505	1.70182	1	1	3.25311	no	2.15849	1	1	4.46447	no	#N/A	#N/A	#N/A	#N/A	#N/A	#N/A	#N/A	#N/A	#N/A	#N/A
KCTD8	XLOC_037945	4:44175925-44450876	1.70069	1	1	3.25056	no	0.883026	1	1	1.84424	no	1.17915	1	1	2.26443	no	-0.107256	1	1	0.928352	no
GRM2	XLOC_033953	3:51741085-51752629	1.70043	1	1	3.24998	no	1.33786	1	1	2.52776	no	1.24109	1	1	2.36377	no	1.61735	1	1	3.06811	no
ROM1	XLOC_007956	11:62369649-62382592	1.70019	0.1331	0.638871	3.24944	no	1.27929	0.21905	0.698909	2.42719	no	0.815777	0.5518	0.967859	1.76025	no	-0.123549	0.9208	0.999777	0.917927	no
CCDC154	XLOC_019263	16:1484383-1494557	1.69943	1	1	3.24773	no	1.40315	1	1	2.64478	no	1.53763	1	1	2.90317	no	1.00736	1	1	2.01023	no
RUNDC3B	XLOC_045017	7:87133174-87461611	1.69767	1	1	3.24377	no	1.74323	0.00075	0.0120877	3.34784	yes	0.528668	1	1	1.4426	no	0.690999	1	1	1.6144	no
-	XLOC_033537	22:50980737-50983560	1.69753	0.00465	0.0810501	3.24345	no	1.48897	0.00935	0.0908566	2.80689	no	1.56214	0.01	0.188496	2.95292	no	0.184111	0.7698	0.999777	1.13612	no
ARID3C	XLOC_050710	9:34621375-34628104	1.69581	1	1	3.23959	no	1.97044	1	1	3.91888	no	1.86153	1	1	3.63393	no	1.70609	1	1	3.26275	no
CCT7P1	XLOC_042798	6:150201097-150202708	1.6919	1	1	3.23082	no	1.33321	1	1	2.51963	no	0.243126	1	1	1.18355	no	0.124617	1	1	1.09022	no
SLC8A1-AS1	XLOC_026911	2:40013592-40838193	1.69165	1	1	3.23026	no	2.21545	1	1	4.64426	no	1.36797	1	1	2.58107	no	1.02114	1	1	2.02952	no
CTD-2012J19.1	XLOC_038909	5:1567613-1634132	1.69116	1	1	3.22916	no	0.979407	1	1	1.97165	no	0.992837	1	1	1.99009	no	#N/A	#N/A	#N/A	#N/A	#N/A
-	XLOC_047642	8:79850711-79888109	1.68763	1	1	3.22127	no	1.82847	1	1	3.5516	no	1.65291	1	1	3.14467	no	0.170993	1	1	1.12583	no
PRND	XLOC_030501	20:4702555-4709106	1.68651	1	1	3.21877	no	2.47967	1	1	5.5777	no	#N/A	#N/A	#N/A	#N/A	#N/A	#N/A	#N/A	#N/A	#N/A	#N/A
-	XLOC_008206	11:73485970-73486366	1.686	0.15755	0.689436	3.21763	no	-0.360923	1	1	0.778666	no	0.985806	0.48645	0.953455	1.98042	no	-1.38473	1	1	0.382961	no
AC139099.3	XLOC_021611	17:81159764-81188573	1.68421	1	1	3.21364	no	1.61625	1	1	3.06577	no	1.47958	1	1	2.78868	no	0.972408	1	1	1.96211	no
ADAMTS15	XLOC_008709	11:130318868-130346532	1.68412	1	1	3.21344	no	2.16184	1	1	4.47485	no	-0.199343	1	1	0.870947	no	0.480476	1	1	1.3952	no
PRR15L	XLOC_022496	17:46018871-46073562	1.68193	1	1	3.20857	no	2.66669	0.5453	0.956309	6.34971	no	0.517805	1	1	1.43178	no	-0.775445	1	1	0.584208	no
SLC6A20	XLOC_035294	3:45796941-45838027	1.68134	1	1	3.20726	no	2.89465	1	1	7.43664	no	1.99834	1	1	3.9954	no	2.73963	1	1	6.67899	no
HLA-DRA	XLOC_042007	6:32407618-32412823	1.67878	1	1	3.20157	no	2.97509	1	1	7.86306	no	0.0070924	1	1	1.00493	no	-0.0206269	1	1	0.985804	no
CTD-2555O16.2	XLOC_015623	14:64854748-65009955	1.6783	0.46945	0.967867	3.20051	no	0.0930167	0.91785	0.996063	1.0666	no	0.0349005	1	1	1.02449	no	1.8531	0.4462	0.999777	3.61276	no
RP11-250B2.3	XLOC_042386	6:81152645-81176117	1.67495	1	1	3.19308	no	1.60493	1	1	3.04181	no	2.26663	0.02105	0.282924	4.81198	no	1.69725	1	1	3.24282	no
SIM1	XLOC_043856	6:100832890-100912848	1.67481	1	1	3.19277	no	2.58652	5e-05	0.00116756	6.00648	yes	1.53548	1	1	2.89885	no	1.98375	0.0107	0.314199	3.9552	no
ITPR1-AS1	XLOC_034998	3:4532574-4534847	1.67406	1	1	3.19111	no	0.479598	1	1	1.39436	no	0.984475	1	1	1.97859	no	1.319	1	1	2.49493	no
RP11-70F11.7	XLOC_010727	12:50254989-50259528	1.67371	0.1753	0.717619	3.19034	no	-0.0194625	1	1	0.9866	no	-0.791435	1	1	0.577769	no	#N/A	#N/A	#N/A	#N/A	#N/A
KCND3	XLOC_003782	1:112313283-112531777	1.67276	1	1	3.18824	no	1.98393	1	1	3.95569	no	1.16192	1	1	2.23755	no	0.527832	1	1	1.44176	no
ZNF252P-AS1	XLOC_048111	8:146198974-146231432	1.67093	1	1	3.1842	no	0.864762	1	1	1.82104	no	1.07643	1	1	2.10881	no	1.48458	1	1	2.79836	no
ADRA2B	XLOC_029335	2:96778706-96781984	1.67032	1	1	3.18285	no	4.03833	0.00145	0.020962	16.4308	yes	-0.477556	1	1	0.718193	no	-0.779001	1	1	0.58277	no
HSD17B3	XLOC_051145	9:98997587-99064434	1.66876	0.0152	0.181734	3.17941	no	-0.904951	1	1	0.534051	no	-0.939799	1	1	0.521306	no	0.997024	1	1	1.99588	no
DNAH6	XLOC_027225	2:84743578-85046713	1.6687	1	1	3.17928	no	2.42823	1	1	5.38233	no	0.353527	1	1	1.27768	no	1.66936	1	1	3.18073	no
CACNB4	XLOC_029730	2:152689289-152965716	1.66865	1	1	3.17917	no	2.15697	0.0009	0.0140464	4.45977	yes	0.676034	1	1	1.59774	no	0.295431	1	1	1.22725	no
TRPA1	XLOC_048727	8:72740401-73030628	1.66859	0.09475	0.547861	3.17904	no	1.42419	0.1087	0.49349	2.68364	no	1.40536	0.17205	0.736628	2.64884	no	0.614837	0.52675	0.999777	1.53138	no
RP11-526A4.1	XLOC_038615	4:150273168-150817385	1.66577	1	1	3.17283	no	-0.30189	1	1	0.811189	no	0.607316	1	1	1.52342	no	1.68383	1	1	3.2128	no
TERT	XLOC_040241	5:1253261-1295184	1.66468	0.02255	0.235206	3.17043	no	0.750596	0.1646	0.615088	1.68249	no	0.782633	0.13145	0.674271	1.72027	no	1.46919	0.01395	0.360566	2.76866	no
PIK3R3	XLOC_003265	1:46505811-46651633	1.66333	0.02485	0.251226	3.16747	no	2.26898	0.0043	0.0507473	4.81982	no	0.516566	0.4721	0.948112	1.43055	no	0.123969	0.85945	0.999777	1.08973	no
AC015849.19	XLOC_022203	17:34136458-34195895	1.66243	0.50415	0.981397	3.16549	no	0.0361656	1	1	1.02538	no	0.510554	1	1	1.4246	no	1.41621	0.5655	0.999777	2.66883	no
ALK	XLOC_028767	2:29415639-30144432	1.66019	1	1	3.16058	no	3.80746	1	1	14.001	no	#N/A	#N/A	#N/A	#N/A	#N/A	#N/A	#N/A	#N/A	#N/A	#N/A
RP4-647J21.1	XLOC_046041	7:44998597-45000508	1.65831	1	1	3.15647	no	1.67003	1	1	3.18221	no	1.8015	1	1	3.48582	no	0.675345	1	1	1.59698	no
NRTN	XLOC_024214	19:5805422-5828335	1.65689	0.0153	0.182779	3.15336	no	2.09972	0.0024	0.0316448	4.28626	yes	0.25375	1	1	1.1923	no	0.123069	1	1	1.08905	no
RP11-638I2.8	XLOC_014951	14:100800124-100996640	1.65672	1	1	3.15299	no	1.42749	1	1	2.68978	no	2.35309	0.3922	0.911559	5.10917	no	2.25102	0.46295	0.999777	4.76019	no
RP11-479O9.2	XLOC_044855	7:65235924-65268400	1.65666	1	1	3.15286	no	1.57237	1	1	2.97393	no	-0.00925846	1	1	0.993603	no	1.37719	1	1	2.59762	no
-	XLOC_020643	17:20316264-20317037	1.65649	1	1	3.15249	no	1.96114	1	1	3.8937	no	1.65256	1	1	3.14391	no	1.63206	1	1	3.09955	no
RP11-128A17.1	XLOC_016480	15:37181408-37393504	1.65485	1	1	3.1489	no	0.156324	1	1	1.11444	no	0.513439	1	1	1.42745	no	1.70606	1	1	3.26269	no
-	XLOC_030835	20:43711189-43712330	1.65126	1	1	3.14108	no	1.42584	1	1	2.68671	no	0.654555	1	1	1.57413	no	-0.782341	1	1	0.581423	no
AKR1B10	XLOC_045388	7:134212343-134226160	1.65109	0.0304	0.286886	3.14071	no	-1.01865	1	1	0.493578	no	-0.0498346	1	1	0.966047	no	-2.70244	1	1	0.153633	no
PLAC8	XLOC_038217	4:84011200-84058228	1.65085	0.0031	0.060605	3.14019	no	1.24898	0.01455	0.126877	2.37673	no	0.947606	0.0674	0.518012	1.92867	no	-0.116681	0.83885	0.999777	0.922307	no
RP3-508I15.10	XLOC_033384	22:39052640-39077825	1.6479	1	1	3.13377	no	1.76098	1	1	3.38928	no	1.52195	1	1	2.87179	no	1.17769	1	1	2.26214	no
-	XLOC_007225	10:43160860-43161953	1.64649	1	1	3.13071	no	0.744953	1	1	1.67592	no	0.917528	1	1	1.88888	no	-0.845719	1	1	0.556433	no
NCAN	XLOC_024538	19:19322783-19363042	1.64549	1	1	3.12854	no	4.3982	0.0002	0.00389186	21.0858	yes	#N/A	#N/A	#N/A	#N/A	#N/A	-0.283462	1	1	0.821617	no
CTB-60B18.15	XLOC_026348	19:49553473-49554103	1.64338	0.0879	0.527218	3.12397	no	1.66041	0.0731	0.394379	3.16106	no	-2.51107	1	1	0.175425	no	#N/A	#N/A	#N/A	#N/A	#N/A
PRRT4	XLOC_046696	7:127990378-128001739	1.64117	1	1	3.11919	no	2.54761	0.0003	0.00552166	5.84665	yes	-0.202849	1	1	0.868833	no	-0.216966	1	1	0.860373	no
ZNF181	XLOC_026009	19:35224271-35233949	1.64056	0.20425	0.764513	3.11787	no	0.978426	0.5219	0.946354	1.97031	no	1.22869	1	1	2.34354	no	1.63766	0.41825	0.999777	3.11161	no
RP3-439F8.1	XLOC_032977	22:46937391-46944093	1.63988	1	1	3.1164	no	1.81153	1	1	3.51014	no	1.77321	1	1	3.41814	no	2.0362	1	1	4.10164	no
SSPO	XLOC_045581	7:149473130-149531068	1.63788	1	1	3.11208	no	1.42123	1	1	2.67814	no	-0.0463709	1	1	0.968369	no	0.747533	1	1	1.67892	no
AC156455.1	XLOC_011456	12:122501211-122506522	1.63734	1	1	3.11092	no	2.09072	1	1	4.25961	no	1.04059	1	1	2.05707	no	1.85065	1	1	3.60663	no
-	XLOC_023872	18:47063120-47064114	1.63618	1	1	3.10842	no	0.394677	1	1	1.31465	no	0.35902	1	1	1.28255	no	1.27288	1	1	2.41643	no
ADAMTS16	XLOC_038930	5:5140442-5320417	1.63556	1	1	3.10708	no	-0.217082	1	1	0.860304	no	1.23279	1	1	2.35021	no	#N/A	#N/A	#N/A	#N/A	#N/A
SLC12A5	XLOC_030862	20:44637546-44688789	1.63201	0.2993	0.856505	3.09945	no	1.46753	0.2922	0.781738	2.76548	no	-2.06815	1	1	0.238465	no	0.0298129	1	1	1.02088	no
AC005152.2,AC005152.3,RP11-84E24.2	XLOC_022774	17:70017991-70216859	1.6315	0.00855	0.123446	3.09835	no	0.985808	0.10955	0.494493	1.98042	no	1.55295	0.02095	0.282125	2.93416	no	0.843349	0.1531	0.937218	1.79421	no
-	XLOC_043516	6:44064885-44065454	1.6298	0.19015	0.74048	3.0947	no	1.21101	1	1	2.315	no	1.42972	1	1	2.69394	no	1.05765	1	1	2.08154	no
SNED1	XLOC_028496	2:241938254-242041747	1.62754	0.0311	0.291304	3.08986	no	2.36091	0.00045	0.00778592	5.13694	yes	0.837741	1	1	1.78725	no	0.0675901	1	1	1.04796	no
AC127496.1	XLOC_021544	17:78965397-78983317	1.62498	1	1	3.08438	no	1.34255	1	1	2.53599	no	2.239	1	1	4.7207	no	0.844356	1	1	1.79546	no
FAM227A	XLOC_033383	22:38974124-39052634	1.62396	0.0078	0.115263	3.0822	no	1.62007	0.00785	0.079831	3.0739	no	1.72016	0.0098	0.18675	3.29473	no	-0.0503659	1	1	0.965691	no
EDIL3	XLOC_040830	5:83236305-83786583	1.62216	0.00425	0.0762838	3.07836	no	1.62237	0.00135	0.0196837	3.0788	yes	1.1842	0.0281	0.338148	2.27237	no	-0.430345	1	1	0.742084	no
PTPRN	XLOC_030221	2:220154344-220174370	1.61978	1	1	3.07328	no	2.94295	1	1	7.68982	no	#N/A	#N/A	#N/A	#N/A	#N/A	#N/A	#N/A	#N/A	#N/A	#N/A
CCDC81	XLOC_008315	11:86085777-86134151	1.6193	1	1	3.07226	no	1.22067	1	1	2.33055	no	2.81424	1	1	7.03349	no	0.600952	1	1	1.51672	no
TNFSF18	XLOC_004389	1:172745044-173130533	1.61814	1	1	3.06979	no	1.19828	1	1	2.29466	no	0.434427	1	1	1.35137	no	1.12013	1	1	2.17367	no
COL25A1	XLOC_038370	4:109731876-110223813	1.6179	1	1	3.06928	no	0.699553	1	1	1.624	no	0.892291	1	1	1.85612	no	0.184991	1	1	1.13681	no
PI16	XLOC_042088	6:36555310-36932613	1.61769	1	1	3.06883	no	3.17027	1	1	9.00215	no	0.536142	1	1	1.45009	no	-0.89231	1	1	0.538751	no
RP5-864K19.4	XLOC_000604	1:39325671-39407471	1.61761	1	1	3.06866	no	1.78605	0.28155	0.770888	3.44869	no	1.13606	1	1	2.1978	no	1.91966	1	1	3.78334	no
AC139099.5	XLOC_022982	17:81159764-81188573	1.61724	1	1	3.06788	no	-0.875166	1	1	0.545191	no	1.34507	1	1	2.54043	no	1.14116	1	1	2.20558	no
-	XLOC_000364	1:23830689-23830971	1.61567	0.2604	0.817693	3.06454	no	-0.187338	1	1	0.878225	no	-0.428928	1	1	0.742814	no	#N/A	#N/A	#N/A	#N/A	#N/A
CARD14	XLOC_021532	17:78143790-78227299	1.61559	0.01625	0.188978	3.06437	no	1.36368	0.04945	0.305283	2.57341	no	0.546839	1	1	1.46088	no	0.128615	1	1	1.09324	no
NAPSA	XLOC_026387	19:50815193-50886239	1.61529	0.09755	0.555394	3.06373	no	1.38941	0.12365	0.530201	2.61972	no	0.912042	0.32835	0.871954	1.88171	no	0.449129	0.6479	0.999777	1.36522	no
DLEU7	XLOC_013780	13:50601268-51423145	1.61462	1	1	3.06231	no	1.85362	1	1	3.61406	no	1.52184	1	1	2.87157	no	0.682627	1	1	1.60506	no
MIR155,MIR155HG	XLOC_031804	21:26934220-26947480	1.61452	1	1	3.0621	no	-0.250905	1	1	0.840369	no	1.62328	1	1	3.08075	no	0.798117	1	1	1.73883	no
CTD-2031P19.4	XLOC_039210	5:55230922-55290839	1.61401	0.4781	0.971263	3.06101	no	1.64533	0.5336	0.951879	3.12819	no	1.75622	0.5256	0.963069	3.37812	no	0.713698	1	1	1.64	no
-	XLOC_019335	16:3208145-3208734	1.6128	0.15265	0.680251	3.05845	no	0.0709821	1	1	1.05043	no	1.06833	1	1	2.097	no	0.799258	1	1	1.74021	no
XKR9	XLOC_047587	8:71581599-71702606	1.61274	1	1	3.05832	no	1.03782	1	1	2.05312	no	1.16301	1	1	2.23924	no	#N/A	#N/A	#N/A	#N/A	#N/A
GREM1	XLOC_016442	15:33009470-33026870	1.61146	1	1	3.05561	no	1.04977	1	1	2.0702	no	2.20107	1	1	4.5982	no	1.22575	1	1	2.33877	no
RP11-22P6.3	XLOC_019631	16:28889725-28950667	1.60772	0.4018	0.938268	3.0477	no	0.504478	0.8374	0.996063	1.41861	no	0.286555	0.8788	0.994059	1.21972	no	1.16039	0.6583	0.999777	2.23518	no
CTC-463N11.3	XLOC_040925	5:98104353-98134347	1.60693	1	1	3.04603	no	1.37811	1	1	2.59928	no	0.71037	1	1	1.63622	no	0.774812	1	1	1.71097	no
FGF17	XLOC_047198	8:21899908-21906320	1.60644	1	1	3.045	no	3.50711	0.0009	0.0140464	11.3696	yes	-0.554023	1	1	0.681118	no	-1.0703	1	1	0.47622	no
RP11-733O18.1	XLOC_057919	X:5571461-5644346	1.60641	0.00795	0.116883	3.04493	no	1.83032	0.0017	0.0237891	3.55616	yes	0.0942253	1	1	1.06749	no	-0.543923	1	1	0.685903	no
-	XLOC_030646	20:29652345-29652607	1.60403	0.09095	0.535303	3.03991	no	0.743192	0.38615	0.867876	1.67388	no	-0.221057	0.865	0.994059	0.857937	no	-0.135683	0.89215	0.999777	0.910239	no
CLDN16	XLOC_034893	3:190040329-190129932	1.6039	1	1	3.03964	no	0.609698	1	1	1.52594	no	-0.0425991	1	1	0.970904	no	-0.782236	1	1	0.581465	no
SRCRB4D	XLOC_046315	7:76018650-76071388	1.6037	0.07565	0.48383	3.03922	no	3.27584	0.00065	0.0107478	9.68559	yes	0.273775	0.84825	0.994059	1.20897	no	-0.102669	0.92545	0.999777	0.931308	no
-	XLOC_036304	3:189652418-189653483	1.6035	1	1	3.0388	no	1.25961	1	1	2.39431	no	3.00545	0.06825	0.520329	8.03028	no	1.78295	1	1	3.44129	no
-	XLOC_006105	10:126920358-126952400	1.60167	0.0457	0.368324	3.03494	no	1.57391	0.0438	0.280302	2.9771	no	-0.0411004	1	1	0.971913	no	-1.49999	1	1	0.353556	no
CHI3L2	XLOC_001255	1:111729673-111786062	1.60162	1	1	3.03484	no	0.00594562	1	1	1.00413	no	2.43253	1	1	5.39839	no	0.923783	1	1	1.89708	no
TNFSF14	XLOC_025561	19:6662731-6670599	1.60157	1	1	3.03473	no	2.95764	0.0001	0.00213617	7.76852	yes	-0.288402	1	1	0.818809	no	#N/A	#N/A	#N/A	#N/A	#N/A
RP11-486B10.4	XLOC_000652	1:41972035-42501596	1.60136	1	1	3.03429	no	2.35019	0.1003	0.472027	5.09891	no	-0.880163	1	1	0.543306	no	0.349618	1	1	1.27422	no
-	XLOC_024949	19:45309442-45310087	1.60125	0.11245	0.596214	3.03406	no	1.40355	0.1585	0.602749	2.64552	no	0.63209	1	1	1.54981	no	-0.050571	1	1	0.965554	no
RP11-350J20.9	XLOC_042800	6:150204447-150244262	1.60052	1	1	3.03253	no	0.0596705	1	1	1.04223	no	0.88899	1	1	1.85188	no	0.840164	1	1	1.79025	no
CARNS1	XLOC_008093	11:67159175-67193078	1.59896	1	1	3.02925	no	2.63776	0.03995	0.264403	6.22365	no	-0.88517	1	1	0.541424	no	0.395842	1	1	1.31571	no
ADAMTS14	XLOC_005610	10:72432558-72522197	1.59752	1	1	3.02623	no	3.34592	1	1	10.1677	no	0.679616	1	1	1.60171	no	0.0522244	1	1	1.03686	no
AC007000.11	XLOC_046326	7:76139744-77046115	1.59589	0.5363	0.988204	3.02281	no	2.58172	0.503	0.941432	5.98653	no	1.25422	1	1	2.38538	no	#N/A	#N/A	#N/A	#N/A	#N/A
NEK10	XLOC_035154	3:27151575-27410951	1.59402	1	1	3.01889	no	0.826904	1	1	1.77387	no	0.947388	1	1	1.92838	no	1.98252	1	1	3.95183	no
RP1-65J11.1	XLOC_000494	1:31297008-31306693	1.59401	0.05975	0.429142	3.01887	no	2.60122	0.00475	0.054914	6.068	no	-1.35687	1	1	0.390428	no	-1.19951	1	1	0.435423	no
-	XLOC_038564	4:141677449-141678074	1.59285	0.0417	0.349117	3.01645	no	1.57292	0.0424	0.274999	2.97506	no	0.158207	0.84875	0.994059	1.1159	no	-0.189208	0.84555	0.999777	0.877087	no
KLK11	XLOC_026410	19:51525471-51531295	1.59104	0.00325	0.0623578	3.01266	no	3.33238	5e-05	0.00116756	10.0727	yes	0.240897	1	1	1.18173	no	-1.44891	1	1	0.366298	no
S100P	XLOC_036489	4:6694795-6698897	1.59014	0.05945	0.428105	3.01079	no	2.24074	0.01	0.095534	4.72639	no	0.529333	0.5362	0.965288	1.44326	no	-3.13557	0.07145	0.726218	0.113789	no
FOXN1	XLOC_020738	17:26782769-26972472	1.58859	0.23145	0.789714	3.00755	no	2.53271	0.10725	0.489814	5.78658	no	-0.497869	1	1	0.708152	no	-1.56321	1	1	0.338397	no
FAM20A	XLOC_022756	17:66255322-66760023	1.58752	1	1	3.00532	no	0.700505	1	1	1.62507	no	0.465801	1	1	1.38108	no	-0.903229	1	1	0.534689	no
PLEKHD1	XLOC_014698	14:69951408-69995215	1.58625	1	1	3.00268	no	2.65976	1	1	6.31928	no	#N/A	#N/A	#N/A	#N/A	#N/A	1.15673	1	1	2.22952	no
RP11-173C20.1	XLOC_012828	12:127210815-127256986	1.58501	0.1324	0.637655	3.0001	no	1.60133	0.094	0.458022	3.03423	no	0.615729	0.56405	0.972364	1.53233	no	-0.149834	1	1	0.901354	no
RP11-404P21.2	XLOC_015919	14:96671015-96735304	1.58478	0.08675	0.523576	2.99962	no	2.08789	0.01585	0.134308	4.25126	no	0.231991	0.8058	0.994059	1.17445	no	0.0382706	0.969	0.999777	1.02688	no
SOCS1	XLOC_019435	16:11343475-11445619	1.58428	0.02015	0.21836	2.99858	no	2.07653	0.0029	0.036779	4.21791	yes	0.561457	0.40265	0.919682	1.47576	no	-0.193479	0.79815	0.999777	0.874494	no
ALOX15	XLOC_021702	17:4534196-4545589	1.58417	0.0101	0.137976	2.99835	no	2.41344	0.00015	0.00305086	5.32743	yes	0.924933	1	1	1.8986	no	-1.23459	1	1	0.424963	no
GPAT2	XLOC_029334	2:96677696-96705199	1.58368	1	1	2.99733	no	1.81397	1	1	3.51609	no	1.47507	1	1	2.77997	no	1.16089	1	1	2.23595	no
LINC00266-3,RP1-24O22.3	XLOC_042961	6:131909-145083	1.5828	1	1	2.99551	no	1.49556	1	1	2.81974	no	#N/A	#N/A	#N/A	#N/A	#N/A	0.403377	1	1	1.3226	no
AC022201.5	XLOC_027119	2:70523106-70529222	1.58249	0.57845	0.998065	2.99486	no	0.964049	0.72025	0.991612	1.95078	no	#N/A	#N/A	#N/A	#N/A	#N/A	0.790211	1	1	1.72933	no
PAPPA2	XLOC_001921	1:176432306-176814735	1.58177	1	1	2.99337	no	1.47161	1	1	2.77331	no	5.26797	1	1	38.5316	no	0.81482	1	1	1.75908	no
AC007362.1	XLOC_028179	2:206546713-206662857	1.5813	0.2303	0.789233	2.99239	no	1.36437	0.29375	0.783282	2.57464	no	2.12429	0.10245	0.608347	4.35988	no	0.848454	1	1	1.80057	no
KLLN	XLOC_006853	10:89618917-89731687	1.58047	1	1	2.99067	no	1.5949	1	1	3.02074	no	0.232221	1	1	1.17464	no	2.82408	1	1	7.08162	no
RP11-690I21.1	XLOC_030318	2:232597134-232674093	1.57964	1	1	2.98895	no	1.9819	1	1	3.95013	no	1.78357	1	1	3.44277	no	#N/A	#N/A	#N/A	#N/A	#N/A
FLT4	XLOC_041565	5:180028505-180076624	1.57931	1	1	2.98827	no	1.95642	1	1	3.88098	no	1.09807	1	1	2.14068	no	1.28801	1	1	2.44191	no
RP11-598F7.4	XLOC_011577	12:175930-291565	1.57887	1	1	2.98736	no	2.1386	1	1	4.40335	no	1.47263	1	1	2.77527	no	-1.06692	1	1	0.477337	no
RP5-884M6.1	XLOC_045205	7:106415456-106436010	1.57803	0.086	0.521006	2.98562	no	-0.262155	1	1	0.833841	no	1.27193	0.16405	0.723787	2.41484	no	0.541567	0.59595	0.999777	1.45555	no
LDHD	XLOC_020121	16:75145757-75150669	1.57795	0.0342	0.309039	2.98545	no	2.14782	0.0065	0.0693288	4.43158	no	0.623418	1	1	1.54052	no	-0.419072	1	1	0.747906	no
RP11-283G6.5	XLOC_011868	12:26272958-26986131	1.57772	0.3723	0.921931	2.98498	no	1.07331	0.5265	0.94806	2.10426	no	1.44299	0.39595	0.915076	2.71884	no	-1.19822	1	1	0.435813	no
-	XLOC_043246	6:29844506-29845365	1.57686	1	1	2.9832	no	1.00268	1	1	2.00372	no	0.303319	1	1	1.23398	no	#N/A	#N/A	#N/A	#N/A	#N/A
PMP22	XLOC_021858	17:15133094-15169024	1.5768	1	1	2.98307	no	1.89251	0.00175	0.0243995	3.71281	yes	0.900296	1	1	1.86645	no	1.13268	1	1	2.19266	no
RP11-130F10.1	XLOC_037575	4:178366132-178598280	1.57645	1	1	2.98235	no	1.59138	1	1	3.01337	no	2.00008	1	1	4.00022	no	-0.273795	1	1	0.827141	no
RP11-290F20.1	XLOC_030906	20:48909256-48937879	1.57563	0.02535	0.254856	2.98066	no	2.05648	0.0037	0.0447718	4.1597	yes	0.983526	0.13635	0.68279	1.97729	no	0.625499	1	1	1.54274	no
KIAA1257,RP11-723O4.6	XLOC_035837	3:128598438-128759585	1.57441	1	1	2.97814	no	1.58994	1	1	3.01037	no	0.788837	1	1	1.72768	no	0.564301	1	1	1.47867	no
RP11-74E22.3	XLOC_020330	17:2592679-2616127	1.574	1	1	2.97729	no	#N/A	#N/A	#N/A	#N/A	#N/A	0.516366	1	1	1.43035	no	#N/A	#N/A	#N/A	#N/A	#N/A
NTRK1	XLOC_001669	1:156776034-156851642	1.57187	1	1	2.9729	no	2.50799	0.0018	0.0249828	5.68827	yes	-0.254592	1	1	0.838224	no	0.299303	1	1	1.23055	no
PNMA3	XLOC_057814	X:152224765-152228827	1.57186	1	1	2.97288	no	1.7196	1	1	3.29345	no	0.745096	1	1	1.67609	no	0.318711	1	1	1.24722	no
OTOF	XLOC_028720	2:26680070-26781566	1.57165	1	1	2.97244	no	3.51485	5e-05	0.00116756	11.4308	yes	#N/A	#N/A	#N/A	#N/A	#N/A	0.340139	1	1	1.26588	no
EYS	XLOC_043650	6:64345724-66417118	1.57162	1	1	2.97238	no	-0.330138	1	1	0.79546	no	-3.44997	1	1	0.0915073	no	-0.7587	1	1	0.591029	no
AC096649.2	XLOC_027948	2:175936977-176033250	1.56791	1	1	2.96475	no	-0.846608	1	1	0.556091	no	0.996207	1	1	1.99475	no	#N/A	#N/A	#N/A	#N/A	#N/A
PRSS27	XLOC_019313	16:2762418-2771261	1.56743	0.00735	0.110418	2.96376	no	1.47621	0.01125	0.104474	2.78217	no	0.49282	1	1	1.40719	no	-0.592794	1	1	0.663058	no
RP11-613D13.5	XLOC_009167	11:43577985-43902276	1.56741	1	1	2.96372	no	-1.57089	1	1	0.336601	no	0.431707	1	1	1.34883	no	0.816888	1	1	1.7616	no
POM121L2	XLOC_043172	6:27253681-27279949	1.56684	1	1	2.96255	no	2.50788	1	1	5.68784	no	2.60113	1	1	6.06762	no	0.0719295	1	1	1.05112	no
ZNF295-AS1	XLOC_031948	21:43406939-43445060	1.56562	1	1	2.96005	no	1.47358	1	1	2.7771	no	-0.284242	1	1	0.821173	no	0.897123	1	1	1.86235	no
OR2A13P	XLOC_045537	7:143839101-143840031	1.56391	1	1	2.95654	no	0.457835	1	1	1.37348	no	#N/A	#N/A	#N/A	#N/A	#N/A	1.05452	1	1	2.07703	no
TNFRSF13C	XLOC_033437	22:42321044-42322822	1.56381	1	1	2.95634	no	1.05288	1	1	2.07467	no	#N/A	#N/A	#N/A	#N/A	#N/A	1.53598	1	1	2.89985	no
CACNA2D2	XLOC_033943	3:50400232-50541675	1.56308	1	1	2.95484	no	2.38167	0.01845	0.151229	5.2114	no	-0.658393	1	1	0.633584	no	0.49928	1	1	1.41351	no
AF064858.10	XLOC_032287	21:40393534-40402779	1.56227	0.23745	0.795886	2.95318	no	-0.697708	0.50675	0.942339	0.616551	no	1.22523	0.25235	0.815623	2.33793	no	0.234437	0.8594	0.999777	1.17645	no
-	XLOC_032003	21:46294421-46295645	1.56189	1	1	2.9524	no	1.4107	1	1	2.65866	no	-0.0116463	1	1	0.99196	no	0.665227	1	1	1.58582	no
MACROD1	XLOC_009471	11:63742078-63933795	1.5617	0.05605	0.413185	2.95201	no	1.12401	0.16555	0.617281	2.17952	no	1.20779	0.1036	0.610152	2.30984	no	0.743456	0.31595	0.999777	1.67418	no
RP11-65J21.3	XLOC_018371	16:14396144-14420761	1.56067	0.03075	0.289623	2.94991	no	1.71581	0.01925	0.15603	3.28481	no	1.57069	0.04515	0.421249	2.97047	no	0.156592	1	1	1.11465	no
IFNB1	XLOC_050587	9:21077103-21077943	1.5592	0.10465	0.575655	2.9469	no	1.78613	0.0575	0.338125	3.44888	no	2.85592	0.01585	0.244445	7.23965	no	1.39868	0.14985	0.93229	2.6366	no
-	XLOC_051498	9:136125812-136127927	1.55833	0.1246	0.621797	2.94513	no	1.63509	0.068	0.376697	3.10607	no	0.584414	1	1	1.49943	no	-2.55515	1	1	0.170147	no
CTD-2589M5.5	XLOC_007710	11:46259932-46260818	1.55796	1	1	2.94437	no	#N/A	#N/A	#N/A	#N/A	#N/A	0.989028	1	1	1.98485	no	2.31538	1	1	4.97736	no
RP11-521C20.4	XLOC_016500	15:40331473-40359616	1.55782	0.0178	0.200868	2.94409	no	0.887252	0.1882	0.658622	1.84965	no	0.195769	0.80695	0.994059	1.14533	no	0.179462	0.8206	0.999777	1.13246	no
AP3B2	XLOC_017936	15:83205503-83378666	1.55489	0.00785	0.115884	2.93811	no	1.074	0.0349	0.241209	2.10526	no	0.925106	0.09595	0.598279	1.89882	no	1.36319	0.02155	0.448279	2.57253	no
DNAJC9-AS1	XLOC_005642	10:74927923-75119452	1.55387	1	1	2.93604	no	0.596917	1	1	1.51248	no	#N/A	#N/A	#N/A	#N/A	#N/A	0.0677191	1	1	1.04806	no
-	XLOC_033873	3:46469681-46470489	1.55283	1	1	2.93392	no	2.84794	1	1	7.19972	no	#N/A	#N/A	#N/A	#N/A	#N/A	#N/A	#N/A	#N/A	#N/A	#N/A
RP11-718B12.3	XLOC_008286	11:82530208-82533921	1.55151	1	1	2.93124	no	0.959749	1	1	1.94497	no	-0.0156338	1	1	0.989222	no	#N/A	#N/A	#N/A	#N/A	#N/A
FAM70A	XLOC_058679	X:119392504-119445411	1.55063	1	1	2.92945	no	2.05739	1	1	4.16233	no	-1.02377	1	1	0.491829	no	#N/A	#N/A	#N/A	#N/A	#N/A
RP11-961A15.1	XLOC_021643	17:1614804-1641893	1.54857	0.53855	0.989944	2.92527	no	-0.927705	1	1	0.525694	no	-1.18358	1	1	0.440258	no	0.112616	1	1	1.08119	no
RP11-137H2.4	XLOC_006814	10:82289352-82295698	1.54837	1	1	2.92486	no	0.473206	1	1	1.38819	no	1.97813	1	1	3.93982	no	1.79778	1	1	3.47685	no
XKR3	XLOC_033044	22:17264301-17302589	1.54837	1	1	2.92486	no	1.40739	1	1	2.65257	no	-0.153928	1	1	0.8988	no	0.188412	1	1	1.13951	no
WASIR2	XLOC_018141	16:61552-88321	1.54834	1	1	2.9248	no	2.79165	1	1	6.92421	no	#N/A	#N/A	#N/A	#N/A	#N/A	1.31887	1	1	2.49471	no
CTD-2525I3.3	XLOC_026449	19:52693143-52734547	1.54813	1	1	2.92438	no	0.303504	1	1	1.23414	no	-0.14543	1	1	0.90411	no	-0.289939	1	1	0.817937	no
FAM183A	XLOC_000673	1:43610028-43622067	1.54809	1	1	2.9243	no	1.38821	1	1	2.61754	no	0.0601887	1	1	1.0426	no	-0.479074	1	1	0.717438	no
PDE6G	XLOC_022936	17:79617488-79630142	1.54784	0.08575	0.520145	2.92379	no	1.72153	0.0474	0.296881	3.29786	no	-0.652399	1	1	0.636221	no	-0.454219	1	1	0.729905	no
C20orf144	XLOC_030707	20:32244892-32262269	1.546	1	1	2.92006	no	#N/A	#N/A	#N/A	#N/A	#N/A	0.209263	1	1	1.1561	no	#N/A	#N/A	#N/A	#N/A	#N/A
MMP19	XLOC_012207	12:56137063-56236750	1.54587	0.03475	0.31206	2.9198	no	2.56602	0.0005	0.0085927	5.92174	yes	-0.465988	0.56485	0.972364	0.723975	no	-0.312358	0.72715	0.999777	0.805324	no
EMID1	XLOC_032736	22:29601839-29655586	1.54556	0.2334	0.792257	2.91917	no	2.74249	0.19355	0.6663	6.69224	no	-2.18653	1	1	0.219679	no	-1.05163	1	1	0.482423	no
KRT8P46	XLOC_038328	4:103552657-103682151	1.54513	1	1	2.9183	no	1.55755	1	1	2.94354	no	2.20354	1	1	4.60608	no	1.92741	1	1	3.80372	no
GFI1	XLOC_003613	1:92940286-92952433	1.54508	1	1	2.9182	no	2.07318	1	1	4.20813	no	-0.125786	1	1	0.916505	no	-0.0553903	1	1	0.962334	no
RP11-160E2.11	XLOC_020609	17:19064101-19065587	1.54449	1	1	2.91701	no	1.60141	1	1	3.0344	no	0.482922	1	1	1.39757	no	#N/A	#N/A	#N/A	#N/A	#N/A
-	XLOC_003839	1:117908136-117909262	1.54416	1	1	2.91634	no	0.301919	1	1	1.23278	no	1.26712	1	1	2.40681	no	0.613148	1	1	1.52959	no
CHRNA3	XLOC_017884	15:78857845-78913637	1.54399	1	1	2.916	no	2.6681	0.00105	0.0160758	6.35592	yes	-0.584016	1	1	0.667104	no	0.0168938	1	1	1.01178	no
C11orf68	XLOC_008046	11:65682591-65686605	1.54383	0.3955	0.936037	2.91568	no	2.68218	0.16505	0.616318	6.41825	no	-2.23571	0.43205	0.934874	0.212317	no	-0.263536	0.79005	0.999777	0.833044	no
FAM71F1	XLOC_045329	7:128349114-128371677	1.54363	1	1	2.91527	no	0.631194	1	1	1.54885	no	-0.0219965	1	1	0.984869	no	1.79819	1	1	3.47784	no
KCNJ5	XLOC_008693	11:128760139-128790930	1.54347	1	1	2.91495	no	1.71951	1	1	3.29325	no	0.698692	1	1	1.62303	no	-0.515292	1	1	0.699651	no
RCOR2	XLOC_009470	11:63678692-63684316	1.54293	0.0052	0.0873733	2.91386	no	2.21816	5e-05	0.00116756	4.653	yes	-0.0797785	1	1	0.946203	no	0.607168	0.27675	0.999777	1.52327	no
WDR72	XLOC_017604	15:53805937-54055075	1.54166	1	1	2.91129	no	1.52767	0.0018	0.0249828	2.8832	yes	0.766088	1	1	1.70065	no	0.233538	1	1	1.17571	no
CD248	XLOC_009540	11:66080323-66086708	1.54092	1	1	2.9098	no	-0.252974	1	1	0.839165	no	#N/A	#N/A	#N/A	#N/A	#N/A	#N/A	#N/A	#N/A	#N/A	#N/A
ENG	XLOC_051421	9:130577290-130617035	1.5403	0.01315	0.165715	2.90855	no	2.61289	0.0001	0.00213617	6.11728	yes	-0.629416	0.3275	0.871954	0.646438	no	-0.63207	0.3707	0.999777	0.64525	no
TLR10	XLOC_037906	4:38773859-38784611	1.54021	1	1	2.90837	no	-0.0141374	1	1	0.990249	no	#N/A	#N/A	#N/A	#N/A	#N/A	0.0287403	1	1	1.02012	no
GPC2	XLOC_046486	7:99767228-99774995	1.54021	0.0612	0.433373	2.90837	no	1.49166	0.04665	0.293023	2.81212	no	0.5064	0.43485	0.935643	1.4205	no	0.740626	0.3122	0.999777	1.6709	no
FTH1P8	XLOC_057763	X:147133752-147134266	1.53978	1	1	2.9075	no	-0.328567	1	1	0.796327	no	1.46915	1	1	2.76859	no	1.70096	0.2458	0.999777	3.25117	no
C9orf139	XLOC_050424	9:139901685-139931234	1.5394	1	1	2.90674	no	0.470231	1	1	1.38533	no	#N/A	#N/A	#N/A	#N/A	#N/A	#N/A	#N/A	#N/A	#N/A	#N/A
RP11-79H23.3	XLOC_047639	8:79578281-79846109	1.53657	0.60125	0.998065	2.90104	no	1.95413	0.3634	0.848892	3.87482	no	2.12012	0.35935	0.891162	4.3473	no	-0.0440389	0.85195	0.999777	0.969936	no
RP11-266L9.2	XLOC_019591	16:25123049-25189552	1.53643	1	1	2.90076	no	0.289368	1	1	1.2221	no	0.506478	1	1	1.42058	no	0.77155	1	1	1.7071	no
-	XLOC_005754	10:88691294-88692348	1.53599	1	1	2.89987	no	0.669612	1	1	1.59065	no	-0.18216	1	1	0.881382	no	-0.796057	1	1	0.575921	no
C5	XLOC_051346	9:123714615-123812554	1.53534	1	1	2.89857	no	0.401812	1	1	1.32117	no	0.334307	1	1	1.26077	no	-0.0902008	1	1	0.939392	no
HES5	XLOC_002675	1:2460183-2461684	1.53393	1	1	2.89574	no	2.63095	1	1	6.19434	no	#N/A	#N/A	#N/A	#N/A	#N/A	0.213871	1	1	1.1598	no
RP11-467J12.4	XLOC_019885	16:53069601-53086785	1.5324	1	1	2.89267	no	-0.54221	1	1	0.686718	no	-0.31477	1	1	0.803979	no	-0.299016	1	1	0.812807	no
SLC10A6	XLOC_038240	4:87744417-87770498	1.53226	0.01195	0.154772	2.89239	no	1.83465	0.0023	0.0304312	3.56685	yes	0.916226	0.12305	0.658365	1.88717	no	-0.0365052	1	1	0.975014	no
MARCO	XLOC_029517	2:119699741-119752236	1.53103	0.3749	0.924774	2.88992	no	2.8781	0.2558	0.742543	7.35181	no	-0.0307739	1	1	0.978895	no	0.016468	1	1	1.01148	no
RP11-736K20.5	XLOC_009819	11:86502100-86666433	1.52905	1	1	2.88596	no	1.01732	1	1	2.02416	no	0.989376	1	1	1.98533	no	1.3309	1	1	2.5156	no
RADIL	XLOC_045716	7:4836685-4923350	1.52844	1	1	2.88474	no	2.64283	0.0004	0.00703218	6.24556	yes	-1.14661	1	1	0.451685	no	0.460865	1	1	1.37637	no
RP11-624G17.3	XLOC_009328	11:57228021-57245007	1.52681	0.1497	0.673836	2.88148	no	2.11934	0.04945	0.305283	4.34495	no	0.525757	0.61815	0.978946	1.43969	no	-0.486853	1	1	0.71358	no
SSPN	XLOC_010554	12:26272958-26986131	1.5264	0.03545	0.314442	2.88066	no	0.883845	0.2537	0.74123	1.84529	no	1.23354	0.1053	0.614957	2.35143	no	0.0687422	1	1	1.0488	no
RP11-597D13.7	XLOC_037472	4:159191529-159199828	1.52188	1	1	2.87165	no	2.36409	1	1	5.14828	no	0.710251	1	1	1.63609	no	1.62153	1	1	3.07701	no
ZNF485	XLOC_005407	10:44101854-44113382	1.52186	0.00525	0.0878055	2.87161	no	0.672969	0.1741	0.633411	1.59435	no	1.41541	0.0162	0.248684	2.66736	no	1.62982	0.0068	0.243238	3.09474	no
RP11-432I5.6	XLOC_019015	16:71657610-71758604	1.52029	0.6174	0.998065	2.86849	no	0.183123	1	1	1.13534	no	#N/A	#N/A	#N/A	#N/A	#N/A	1.31944	1	1	2.49569	no
CYB5R2	XLOC_008932	11:7686330-7698468	1.51945	0.0036	0.0674627	2.86682	no	0.923816	0.0659	0.369615	1.89713	no	1.27587	0.01215	0.209441	2.42145	no	-0.518078	1	1	0.698302	no
TCAP	XLOC_020940	17:37820439-37822808	1.51864	1	1	2.86521	no	2.16899	1	1	4.49708	no	0.0787248	1	1	1.05608	no	0.44146	1	1	1.35798	no
FGR	XLOC_003008	1:27938574-27961788	1.51781	1	1	2.86356	no	2.66685	0.2127	0.689832	6.35041	no	1.65004	1	1	3.13842	no	#N/A	#N/A	#N/A	#N/A	#N/A
SLC5A11	XLOC_018492	16:24857161-24922949	1.5172	1	1	2.86235	no	#N/A	#N/A	#N/A	#N/A	#N/A	2.62319	1	1	6.16111	no	#N/A	#N/A	#N/A	#N/A	#N/A
SH3RF3	XLOC_027500	2:109743782-110262208	1.51672	0.00645	0.100878	2.8614	no	1.9393	0.0006	0.0100295	3.8352	yes	1.08557	1	1	2.12221	no	0.779698	1	1	1.71677	no
-	XLOC_041337	5:151111611-151112389	1.51637	0.15255	0.680251	2.8607	no	-0.155059	1	1	0.898096	no	-1.71801	1	1	0.303968	no	1.64545	0.1346	0.909443	3.12845	no
VILL	XLOC_033782	3:38029549-38048679	1.51546	0.0055	0.0906247	2.8589	no	2.15362	5e-05	0.00116756	4.44943	yes	0.377277	0.4399	0.937272	1.29889	no	-0.0181639	0.97235	0.999777	0.987489	no
-	XLOC_033049	22:17390642-17392522	1.51521	1	1	2.8584	no	2.48569	1	1	5.60102	no	-1.277	1	1	0.412653	no	0.042486	1	1	1.02989	no
TG	XLOC_047989	8:133879202-134147147	1.51513	1	1	2.85825	no	1.55614	0.00215	0.0289729	2.94066	yes	-1.78629	1	1	0.289917	no	-0.731068	1	1	0.602458	no
SSC5D	XLOC_025292	19:55999770-56030465	1.5151	1	1	2.85819	no	2.19955	1	1	4.59336	no	-1.00131	1	1	0.499546	no	0.421214	1	1	1.33905	no
-	XLOC_032350	21:44900725-44903020	1.51243	1	1	2.8529	no	3.00958	0.00905	0.0889587	8.0533	no	0.310074	1	1	1.23977	no	-0.151325	1	1	0.900423	no
PCDH11X	XLOC_057367	X:91034259-91878229	1.51239	1	1	2.85282	no	1.50414	1	1	2.83656	no	-0.268807	1	1	0.830006	no	#N/A	#N/A	#N/A	#N/A	#N/A
RP11-161H23.9	XLOC_012069	12:49686413-49725514	1.51149	1	1	2.85104	no	1.22812	1	1	2.34262	no	1.00311	1	1	2.00432	no	0.913643	1	1	1.8838	no
SUCLA2-AS1	XLOC_013147	13:48510621-48621282	1.51087	1	1	2.84982	no	#N/A	#N/A	#N/A	#N/A	#N/A	#N/A	#N/A	#N/A	#N/A	#N/A	#N/A	#N/A	#N/A	#N/A	#N/A
ACAP1	XLOC_020418	17:7239847-7254797	1.50975	0.07945	0.496717	2.84761	no	1.2573	0.2008	0.676782	2.39048	no	0.548727	0.47305	0.948623	1.46279	no	0.839032	0.30545	0.999777	1.78885	no
ZNF257	XLOC_024596	19:22235253-22274282	1.50791	1	1	2.84398	no	1.83376	1	1	3.56465	no	0.782874	1	1	1.72055	no	2.09071	1	1	4.25958	no
CNTNAP3B	XLOC_049667	9:43684901-43924049	1.50748	0.02295	0.237665	2.84313	no	1.01953	0.1074	0.490207	2.02726	no	1.58025	0.0125	0.212837	2.99022	no	0.984663	1	1	1.97885	no
RP11-279N8.3	XLOC_013747	13:48504289-48506757	1.5071	1	1	2.84238	no	-0.498879	1	1	0.707656	no	#N/A	#N/A	#N/A	#N/A	#N/A	-0.273208	1	1	0.827478	no
PPIAP9	XLOC_043306	6:31487256-31488068	1.50618	1	1	2.84057	no	1.2457	1	1	2.37134	no	1.14258	1	1	2.20775	no	1.90433	1	1	3.74335	no
RP11-53M11.3	XLOC_047478	8:55466920-55474487	1.50574	1	1	2.8397	no	-0.373846	1	1	0.771722	no	0.649327	1	1	1.56844	no	0.152159	1	1	1.11123	no
FOXA3	XLOC_024980	19:46367246-46377055	1.50525	1	1	2.83874	no	2.34534	0.0025	0.0325426	5.0818	yes	0.554528	1	1	1.46869	no	0.562178	1	1	1.4765	no
C6orf10	XLOC_043346	6:32256302-32339684	1.50518	1	1	2.8386	no	0.486332	1	1	1.40088	no	1.18406	1	1	2.27215	no	2.26995	1	1	4.82306	no
RP11-173C20.2	XLOC_012827	12:127210815-127256986	1.50488	0.0129	0.163562	2.83801	no	1.31189	0.0396	0.263215	2.48267	no	0.591871	0.31915	0.867826	1.5072	no	0.298923	0.665	0.999777	1.23023	no
PDX1-AS1	XLOC_013589	13:28403905-28500368	1.5044	1	1	2.83707	no	0.223888	1	1	1.16788	no	-0.273636	1	1	0.827232	no	0.725798	1	1	1.65382	no
AC005330.2	XLOC_024117	19:1285889-1378430	1.50366	1	1	2.83561	no	1.78572	0.4705	0.924024	3.4479	no	1.01278	1	1	2.0178	no	0.3119	1	1	1.24134	no
SLC5A5	XLOC_024503	19:17982781-18005983	1.50325	1	1	2.83481	no	2.43906	0.00735	0.0759583	5.42288	no	0.756549	1	1	1.68944	no	1.64072	1	1	3.11821	no
-	XLOC_033997	3:56726748-56727718	1.50316	1	1	2.83463	no	3.83939	0.10945	0.494493	14.3143	no	0.923962	1	1	1.89732	no	0.688651	1	1	1.61178	no
SLITRK2	XLOC_057752	X:144899349-144907360	1.50229	1	1	2.83292	no	0.115681	1	1	1.08349	no	1.96256	1	1	3.89753	no	-0.166011	1	1	0.891304	no
ALG1L2	XLOC_035858	3:129800673-129838359	1.50224	1	1	2.83282	no	-0.107788	1	1	0.92801	no	-1.09748	1	1	0.467332	no	-0.425	1	1	0.744839	no
RP11-251G23.2	XLOC_045198	7:105170655-105171118	1.49924	1	1	2.82694	no	-0.188343	1	1	0.877613	no	1.58083	1	1	2.99142	no	1.79531	0.2236	0.999777	3.4709	no
EQTN	XLOC_050636	9:27284655-27297137	1.49799	1	1	2.82449	no	0.979589	1	1	1.9719	no	1.22375	1	1	2.33553	no	-0.197701	1	1	0.871939	no
HVCN1	XLOC_012668	12:111051831-111142755	1.49779	1	1	2.8241	no	2.7017	1	1	6.50568	no	0.762314	1	1	1.69621	no	1.48795	1	1	2.8049	no
AC083899.1	XLOC_029222	2:87448235-87449611	1.49779	1	1	2.8241	no	0.219924	1	1	1.16467	no	0.996147	1	1	1.99467	no	2.30831	1	1	4.95303	no
HOPX	XLOC_038034	4:57514154-57548065	1.49777	1	1	2.82406	no	1.26642	1	1	2.40564	no	1.0921	1	1	2.13184	no	1.52484	1	1	2.87755	no
RP13-996F3.5	XLOC_017928	15:82930437-82939159	1.4977	1	1	2.82392	no	0.730191	1	1	1.65886	no	1.0708	1	1	2.1006	no	1.8325	1	1	3.56154	no
OVCH2	XLOC_008933	11:7707401-7927502	1.4976	0.0439	0.360239	2.82373	no	1.02483	0.1792	0.643244	2.03472	no	1.73164	0.0119	0.206153	3.32105	no	2.70829	0.0003	0.0364579	6.53547	yes
KIF5C	XLOC_027796	2:149624038-149883273	1.49691	1	1	2.82238	no	1.76637	1	1	3.40197	no	0.903628	1	1	1.87076	no	1.19897	1	1	2.29576	no
-	XLOC_031043	20:62179316-62180161	1.49624	1	1	2.82107	no	2.00267	0.0821	0.422801	4.00741	no	#N/A	#N/A	#N/A	#N/A	#N/A	0.56266	1	1	1.47699	no
RP11-83B20.1	XLOC_011487	12:124808959-125052135	1.49614	1	1	2.82087	no	-0.505729	1	1	0.704304	no	-0.278735	1	1	0.824313	no	#N/A	#N/A	#N/A	#N/A	#N/A
-	XLOC_005438	10:46971647-46972881	1.49541	0.00545	0.0902118	2.81944	no	1.69348	0.00145	0.020962	3.23436	yes	-0.062964	0.902	0.994059	0.957295	no	-0.599722	0.3282	0.999777	0.659881	no
DNAH7	XLOC_030015	2:196602426-196933536	1.49306	1	1	2.81485	no	2.81066	1	1	7.01605	no	1.91175	1	1	3.76265	no	-0.00400776	1	1	0.997226	no
RP11-430B1.2	XLOC_016677	15:52408770-52587995	1.49242	1	1	2.81361	no	1.42063	1	1	2.67702	no	0.734962	1	1	1.66435	no	-0.888469	1	1	0.540187	no
CRB2	XLOC_050194	9:126118448-126692431	1.49198	1	1	2.81275	no	4.92218	1	1	30.3196	no	#N/A	#N/A	#N/A	#N/A	#N/A	-0.600618	1	1	0.659471	no
AC005264.2	XLOC_025486	19:3136051-3163767	1.49081	1	1	2.81047	no	0.969428	1	1	1.95806	no	1.19551	1	1	2.29026	no	1.2846	1	1	2.43614	no
C20ORF141,C20orf141,TMEM239	XLOC_030472	20:2795613-2800930	1.49074	1	1	2.81033	no	2.10222	1	1	4.2937	no	0.708429	1	1	1.63402	no	#N/A	#N/A	#N/A	#N/A	#N/A
MAN1C1	XLOC_000396	1:25943958-26112698	1.4897	1	1	2.80831	no	1.10383	1	1	2.14925	no	0.099012	1	1	1.07104	no	-0.142432	1	1	0.905991	no
CTD-2023M8.1	XLOC_040374	5:18704541-18746282	1.48923	0.47375	0.968723	2.80739	no	-0.774725	1	1	0.5845	no	#N/A	#N/A	#N/A	#N/A	#N/A	0.30487	1	1	1.23531	no
AC006116.24,AC006116.27	XLOC_026573	19:56732620-56904914	1.48856	1	1	2.80609	no	0.141751	1	1	1.10324	no	0.489112	1	1	1.40358	no	-0.0113077	1	1	0.992193	no
PRPH	XLOC_010712	12:49686413-49725514	1.48852	0.1253	0.622319	2.80601	no	2.38544	0.02325	0.180146	5.22503	no	1.08682	0.3164	0.866188	2.12405	no	0.336412	0.77	0.999777	1.26261	no
KRTAP5-1	XLOC_008778	11:1575273-1620866	1.48687	1	1	2.8028	no	1.89596	1	1	3.7217	no	0.221462	1	1	1.16591	no	#N/A	#N/A	#N/A	#N/A	#N/A
RP11-109P11.1	XLOC_020162	16:80099732-80597032	1.48648	0.2326	0.791382	2.80204	no	1.27964	0.30615	0.797293	2.42778	no	-1.79732	1	1	0.287709	no	-1.78637	1	1	0.289901	no
DLG1-AS1	XLOC_034963	3:196769430-197030618	1.48495	1	1	2.79907	no	1.46702	1	1	2.7645	no	1.50946	1	1	2.84703	no	1.3188	1	1	2.49459	no
CA8	XLOC_048638	8:61099905-61193971	1.48431	1	1	2.79783	no	-2.56485	1	1	0.169006	no	0.494516	1	1	1.40885	no	1.05365	1	1	2.07577	no
HOXB-AS2	XLOC_021144	17:46618255-46683776	1.48253	1	1	2.79438	no	0.21073	1	1	1.15727	no	0.712822	1	1	1.63901	no	0.893891	1	1	1.85818	no
CCNI2	XLOC_039732	5:132083136-132142933	1.48146	1	1	2.79231	no	0.735618	1	1	1.66511	no	-0.109027	1	1	0.927213	no	-0.227783	1	1	0.853946	no
CD27-AS1	XLOC_011642	12:6548166-6580153	1.48094	0.02605	0.259192	2.79131	no	1.51798	0.0167	0.13996	2.8639	no	1.31179	0.0425	0.407455	2.48249	no	0.679462	0.2976	0.999777	1.60154	no
RP11-112H10.6	XLOC_022630	17:56497527-56565745	1.48082	1	1	2.79107	no	0.454691	1	1	1.37049	no	0.987447	1	1	1.98267	no	1.5318	1	1	2.89146	no
RP11-162D9.3	XLOC_047464	8:54090130-54164257	1.47994	1	1	2.78937	no	0.689475	1	1	1.6127	no	1.21854	1	1	2.32711	no	-0.283355	1	1	0.821678	no
PIANP	XLOC_011655	12:6801441-6810209	1.47896	0.01235	0.158534	2.78748	no	1.94397	0.00045	0.00778592	3.84763	yes	0.708958	1	1	1.63462	no	0.13367	1	1	1.09708	no
AC004791.2	XLOC_025771	19:15962786-15975734	1.47593	0.0054	0.0897952	2.78163	no	1.73085	0.00055	0.00932622	3.31923	yes	1.31323	0.01105	0.198729	2.48497	no	0.540261	0.35135	0.999777	1.45424	no
AC107021.1	XLOC_034573	3:145781828-145881440	1.4745	1	1	2.77887	no	-0.034242	1	1	0.976545	no	#N/A	#N/A	#N/A	#N/A	#N/A	-2.05575	1	1	0.240524	no
TACR1	XLOC_029134	2:75185618-75426826	1.47416	1	1	2.77822	no	2.64642	1	1	6.26112	no	#N/A	#N/A	#N/A	#N/A	#N/A	0.918409	1	1	1.89003	no
CBFA2T3	XLOC_020263	16:88941265-89043612	1.47328	0.00635	0.0997453	2.77652	no	2.49535	5e-05	0.00116756	5.63865	yes	-0.127076	1	1	0.915685	no	0.0291862	1	1	1.02044	no
AC104667.3	XLOC_028459	2:238482964-238510257	1.47273	1	1	2.77547	no	1.18198	1	1	2.26888	no	1.06469	1	1	2.09172	no	1.38469	1	1	2.61116	no
TMPRSS4	XLOC_008546	11:117886486-117992605	1.47081	0.00915	0.129397	2.77177	no	3.45279	5e-05	0.00116756	10.9495	yes	0.676256	0.19305	0.763582	1.59799	no	-1.15942	1	1	0.447692	no
CTB-33G10.11	XLOC_026365	19:50094899-50129696	1.47045	0.62755	0.998065	2.77108	no	1.34912	0.6329	0.980558	2.54757	no	1.85404	0.56685	0.972364	3.61511	no	1.57355	0.615	0.999777	2.97636	no
AC006547.13	XLOC_033092	22:20004536-20058045	1.47044	0.1602	0.692652	2.77106	no	0.897743	0.3824	0.864441	1.86315	no	0.220686	1	1	1.16529	no	0.385627	1	1	1.30643	no
FAM190A	XLOC_037083	4:91048685-92523064	1.47034	1	1	2.77087	no	2.37317	0.0001	0.00213617	5.18078	yes	1.5329	1	1	2.89367	no	0.995171	1	1	1.99332	no
VWCE	XLOC_009411	11:61025761-61062896	1.47012	1	1	2.77045	no	0.415673	1	1	1.33392	no	1.43715	1	1	2.70785	no	1.17475	1	1	2.25754	no
-	XLOC_007139	10:125757054-125758238	1.4698	1	1	2.76983	no	1.49725	0.07375	0.397045	2.82304	no	0.243846	1	1	1.18415	no	0.805046	1	1	1.7472	no
-	XLOC_005487	10:51743998-51744734	1.46677	1	1	2.76402	no	1.81181	1	1	3.51082	no	2.05302	1	1	4.14974	no	1.60497	1	1	3.04189	no
MEDAG	XLOC_013040	13:31456069-31551760	1.46542	1	1	2.76144	no	1.36507	1	1	2.57589	no	-0.0225248	1	1	0.984508	no	0.59803	1	1	1.51365	no
-	XLOC_048089	8:145588606-145589856	1.46495	1	1	2.76054	no	0.715522	1	1	1.64208	no	1.22595	1	1	2.33909	no	0.492361	1	1	1.40675	no
-	XLOC_012927	13:20438082-20439497	1.46353	1	1	2.75782	no	1.22956	1	1	2.34495	no	1.25371	1	1	2.38454	no	0.616462	1	1	1.53311	no
CTB-33G10.1	XLOC_026369	19:50222754-50223338	1.46102	1	1	2.75303	no	0.87999	1	1	1.84036	no	1.28432	1	1	2.43567	no	#N/A	#N/A	#N/A	#N/A	#N/A
CTB-91J4.1	XLOC_020883	17:34443569-34504870	1.45736	1	1	2.74605	no	2.56171	0.2559	0.742693	5.90407	no	1.77763	1	1	3.42862	no	#N/A	#N/A	#N/A	#N/A	#N/A
A2ML1-AS1	XLOC_011701	12:8834162-9039597	1.45723	1	1	2.74581	no	1.63913	1	1	3.11478	no	2.28029	1	1	4.85776	no	0.319428	1	1	1.24784	no
PABPC1P3	XLOC_058437	X:73802922-73803381	1.45713	1	1	2.74562	no	0.495087	1	1	1.40941	no	#N/A	#N/A	#N/A	#N/A	#N/A	1.70653	1	1	3.26375	no
LA16c-395F10.2	XLOC_018201	16:1543344-1662111	1.45681	1	1	2.74501	no	2.17506	1	1	4.51605	no	1.27673	1	1	2.42289	no	#N/A	#N/A	#N/A	#N/A	#N/A
RP11-153F1.1	XLOC_003706	1:103957500-104068115	1.45666	1	1	2.74472	no	1.3119	1	1	2.48268	no	#N/A	#N/A	#N/A	#N/A	#N/A	#N/A	#N/A	#N/A	#N/A	#N/A
RP13-580F15.2	XLOC_021697	17:4336982-4391503	1.45658	0.0565	0.414916	2.74457	no	1.77051	0.01965	0.1586	3.41175	no	0.0591301	1	1	1.04184	no	0.118749	1	1	1.08579	no
LA16c-321D4.2	XLOC_019323	16:2961886-3004277	1.45656	1	1	2.74453	no	1.17331	1	1	2.25529	no	#N/A	#N/A	#N/A	#N/A	#N/A	0.00471964	1	1	1.00328	no
AC097461.4	XLOC_030253	2:223725651-223809357	1.45636	1	1	2.74415	no	-0.02997	1	1	0.979441	no	1.39381	1	1	2.62772	no	1.00193	1	1	2.00268	no
RP11-143J12.3	XLOC_023594	18:9102627-9285206	1.45632	0.5759	0.998065	2.74408	no	0.384665	1	1	1.30556	no	-0.00657907	1	1	0.99545	no	-0.58369	1	1	0.667255	no
RP11-173A16.1	XLOC_023960	18:59854490-59974421	1.45587	1	1	2.74322	no	1.3252	1	1	2.50568	no	0.499095	1	1	1.41333	no	0.994375	1	1	1.99222	no
LINC00614	XLOC_006359	10:27232251-27233347	1.45584	1	1	2.74316	no	1.86586	1	1	3.64485	no	#N/A	#N/A	#N/A	#N/A	#N/A	-0.00609464	1	1	0.995784	no
RP11-403A21.1	XLOC_023724	18:21538059-21562520	1.45562	1	1	2.74274	no	0.757245	1	1	1.69026	no	#N/A	#N/A	#N/A	#N/A	#N/A	0.319095	1	1	1.24755	no
AC097724.3	XLOC_028760	2:28931818-28959071	1.45561	1	1	2.74273	no	-0.24285	1	1	0.845074	no	1.26343	1	1	2.40066	no	1.69322	1	1	3.23378	no
FAM22B	XLOC_005707	10:81420644-81610632	1.45558	1	1	2.74267	no	-0.303906	1	1	0.810056	no	-0.17502	1	1	0.885755	no	-0.215856	1	1	0.861035	no
RPL7P57	XLOC_058176	X:47696300-47931025	1.45557	1	1	2.74265	no	1.62589	1	1	3.08633	no	2.49461	1	1	5.63576	no	1.80227	1	1	3.48769	no
-	XLOC_006361	10:27234733-27235532	1.45544	1	1	2.7424	no	2.47618	0.12265	0.527392	5.56422	no	-0.0145134	1	1	0.989991	no	0.691434	1	1	1.61489	no
MICD	XLOC_043252	6:29938577-29940241	1.45542	1	1	2.74236	no	#N/A	#N/A	#N/A	#N/A	#N/A	0.492286	1	1	1.40667	no	#N/A	#N/A	#N/A	#N/A	#N/A
RP11-111J6.2	XLOC_028647	2:18728651-18729470	1.45541	1	1	2.74234	no	-0.244774	1	1	0.843948	no	#N/A	#N/A	#N/A	#N/A	#N/A	-0.0134845	1	1	0.990697	no
AC012462.2	XLOC_028247	2:216318429-216328594	1.4554	1	1	2.74233	no	0.480172	1	1	1.39491	no	#N/A	#N/A	#N/A	#N/A	#N/A	0.319021	1	1	1.24748	no
AC004221.2	XLOC_024110	19:1238177-1239521	1.45537	1	1	2.74227	no	1.47983	1	1	2.78916	no	#N/A	#N/A	#N/A	#N/A	#N/A	#N/A	#N/A	#N/A	#N/A	#N/A
-	XLOC_057911	X:3844994-3845833	1.45537	1	1	2.74227	no	-1.52008	1	1	0.348667	no	-0.240845	1	1	0.84625	no	-0.198745	1	1	0.871308	no
ACTG1P3	XLOC_030451	20:1093905-1160596	1.45507	1	1	2.7417	no	1.73646	1	1	3.33217	no	2.48646	1	1	5.60401	no	#N/A	#N/A	#N/A	#N/A	#N/A
RP4-758J18.7	XLOC_000047	1:1353799-1358071	1.45498	1	1	2.74153	no	2.19393	1	1	4.5755	no	1.64104	1	1	3.11891	no	-0.292791	1	1	0.816321	no
RP11-446H18.1	XLOC_035660	3:106959538-107101007	1.45492	1	1	2.74141	no	0.134072	1	1	1.09739	no	2.12327	1	1	4.3568	no	-0.0228381	1	1	0.984294	no
RP11-841C19.6	XLOC_011827	12:19556978-19873735	1.4549	1	1	2.74138	no	2.39659	1	1	5.26557	no	1.75281	1	1	3.37014	no	-0.0231716	1	1	0.984067	no
-	XLOC_011558	12:133172960-133178398	1.45484	1	1	2.74126	no	4.4949	1	1	22.5476	no	-0.0210717	1	1	0.9855	no	#N/A	#N/A	#N/A	#N/A	#N/A
RP11-569G13.2	XLOC_049995	9:98830261-98966806	1.45484	1	1	2.74126	no	1.85511	1	1	3.61779	no	#N/A	#N/A	#N/A	#N/A	#N/A	0.975507	1	1	1.96633	no
CTB-96E2.2,SEBOX,VTN	XLOC_022054	17:26684603-26734215	1.45478	1	1	2.74115	no	2.80943	1	1	7.01008	no	3.83147	1	1	14.236	no	-0.104807	1	1	0.929929	no
RP11-16K12.1	XLOC_016951	15:79252288-79383115	1.45476	1	1	2.74111	no	2.53767	1	1	5.8065	no	0.480761	1	1	1.39548	no	#N/A	#N/A	#N/A	#N/A	#N/A
AC009093.1	XLOC_018537	16:29259549-29261449	1.45476	1	1	2.74111	no	1.73256	1	1	3.32317	no	0.480761	1	1	1.39548	no	0.318776	1	1	1.24727	no
IFIT1B	XLOC_005787	10:90973325-91180758	1.45475	1	1	2.74109	no	1.59967	1	1	3.03074	no	3.75043	1	1	13.4584	no	1.55838	1	1	2.94523	no
FIGF	XLOC_057978	X:15363712-15402498	1.45473	1	1	2.74105	no	0.472328	1	1	1.38735	no	#N/A	#N/A	#N/A	#N/A	#N/A	2.37063	1	1	5.17167	no
PRSS35	XLOC_042398	6:84222193-84235423	1.45472	1	1	2.74103	no	0.130662	1	1	1.0948	no	#N/A	#N/A	#N/A	#N/A	#N/A	-0.028108	1	1	0.980706	no
AP002387.1	XLOC_009639	11:71093646-71134469	1.45471	1	1	2.74101	no	-0.868898	1	1	0.547565	no	0.479855	1	1	1.3946	no	-0.0272881	1	1	0.981263	no
RP11-408H1.3	XLOC_036169	3:172278677-172313397	1.4547	1	1	2.741	no	-0.870469	1	1	0.546969	no	#N/A	#N/A	#N/A	#N/A	#N/A	#N/A	#N/A	#N/A	#N/A	#N/A
RP11-1094H24.4	XLOC_022551	17:48127712-48133267	1.45467	1	1	2.74094	no	1.89593	1	1	3.72162	no	1.11959	1	1	2.17285	no	0.68182	1	1	1.60416	no
CARS-AS1	XLOC_007302	11:3022151-3078843	1.45465	1	1	2.7409	no	1.45212	1	1	2.7361	no	2.74898	1	1	6.72242	no	1.68164	1	1	3.20792	no
TRIM64EP	XLOC_009853	11:89764273-89806558	1.45463	1	1	2.74086	no	1.15372	1	1	2.22487	no	-0.0237759	1	1	0.983655	no	0.318718	1	1	1.24722	no
BCL2L15	XLOC_003802	1:114304453-114456708	1.45461	1	1	2.74082	no	0.746311	1	1	1.6775	no	#N/A	#N/A	#N/A	#N/A	#N/A	#N/A	#N/A	#N/A	#N/A	#N/A
ENKUR	XLOC_006346	10:25270907-25305085	1.4546	1	1	2.74081	no	4.28738	1	1	19.5268	no	3.57124	1	1	11.8864	no	-0.0298508	1	1	0.979522	no
GPR158	XLOC_005273	10:25447000-25891155	1.45436	1	1	2.74035	no	1.40566	1	1	2.64939	no	1.70188	1	1	3.25325	no	0.910482	1	1	1.87967	no
AC026703.1,NPR3	XLOC_039081	5:32689175-32791819	1.45193	1	1	2.73574	no	1.51579	1	1	2.85955	no	2.96938	1	1	7.832	no	1.93618	1	1	3.82691	no
-	XLOC_000683	1:43989045-43989547	1.45158	1	1	2.73507	no	2.40612	0.1085	0.493021	5.30047	no	#N/A	#N/A	#N/A	#N/A	#N/A	#N/A	#N/A	#N/A	#N/A	#N/A
-	XLOC_031977	21:45582104-45585068	1.45146	1	1	2.73485	no	2.02777	1	1	4.07774	no	-0.55567	1	1	0.680341	no	0.0451226	1	1	1.03177	no
DNAH1	XLOC_033966	3:52350334-52434507	1.45041	1	1	2.73286	no	1.009	1	1	2.01252	no	0.33486	1	1	1.26126	no	0.169254	1	1	1.12448	no
AKR1D1	XLOC_045419	7:137687069-137802732	1.44994	1	1	2.73197	no	2.31801	1	1	4.98644	no	1.44616	1	1	2.72482	no	#N/A	#N/A	#N/A	#N/A	#N/A
GUSBP9,RP11-1198D22.1	XLOC_040704	5:70435715-70585611	1.44902	0.05565	0.412443	2.73023	no	1.02287	0.1413	0.569285	2.03196	no	0.234588	1	1	1.17657	no	0.396618	1	1	1.31642	no
ACE2	XLOC_057980	X:15579155-15620271	1.44885	0.00665	0.103225	2.7299	no	1.05479	0.03135	0.223334	2.07742	no	1.33384	0.01145	0.201877	2.52073	no	0.358021	1	1	1.28167	no
ABO	XLOC_051499	9:136131052-136150617	1.44858	1	1	2.72939	no	0.870693	1	1	1.82854	no	1.02194	1	1	2.03065	no	-0.214669	1	1	0.861744	no
CHDH	XLOC_035438	3:53850243-53880417	1.44825	1	1	2.72877	no	2.74862	1	1	6.72074	no	2.38577	1	1	5.22623	no	2.97428	1	1	7.85864	no
C4B	XLOC_041999	6:31982538-32004035	1.44734	1	1	2.72705	no	2.9039	1	1	7.48447	no	0.990791	1	1	1.98727	no	0.0293942	1	1	1.02058	no
AC007879.2,AC007879.3	XLOC_030115	2:208038357-208102599	1.44704	0.1386	0.651485	2.72648	no	1.37052	0.148	0.584217	2.58564	no	1.83301	0.0761	0.544842	3.5628	no	2.31679	0.0378	0.580578	4.98222	no
SLC6A12	XLOC_011580	12:299238-323741	1.44647	0.00265	0.0534694	2.7254	no	2.68286	5e-05	0.00116756	6.42128	yes	#N/A	#N/A	#N/A	#N/A	#N/A	-0.314235	1	1	0.804277	no
SMTNL2	XLOC_020364	17:4487293-4511614	1.44638	1	1	2.72523	no	4.81571	0.2187	0.698479	28.1626	no	-1.02148	1	1	0.492611	no	#N/A	#N/A	#N/A	#N/A	#N/A
NR3C2	XLOC_038608	4:148999912-149365850	1.44619	1	1	2.72487	no	1.96811	1	1	3.91255	no	0.0385672	1	1	1.02709	no	1.16207	1	1	2.23778	no
-	XLOC_034415	3:127175970-127176313	1.44519	0.2968	0.855169	2.72299	no	1.15284	0.3647	0.849244	2.22351	no	0.433564	1	1	1.35057	no	#N/A	#N/A	#N/A	#N/A	#N/A
CASP16	XLOC_018269	16:3194219-3199964	1.4448	1	1	2.72225	no	0.636163	1	1	1.55419	no	-1.27297	1	1	0.413807	no	#N/A	#N/A	#N/A	#N/A	#N/A
RPS6KA5	XLOC_015861	14:91336798-91691872	1.44459	0.02345	0.241117	2.72185	no	1.12702	0.0714	0.38822	2.18407	no	1.52064	0.01645	0.250368	2.86918	no	0.586344	0.358	0.999777	1.50144	no
CTD-2020K17.1	XLOC_022446	17:43268297-43394414	1.44451	0.0683	0.46346	2.7217	no	2.11478	0.009	0.0888097	4.33124	no	1.04339	0.23635	0.803407	2.06106	no	0.716595	0.40735	0.999777	1.6433	no
LINC00052	XLOC_017045	15:87975288-88247083	1.44449	1	1	2.72167	no	1.43445	1	1	2.70279	no	-0.111092	1	1	0.925887	no	-0.516068	1	1	0.699275	no
-	XLOC_025489	19:3481203-3483034	1.44202	1	1	2.71701	no	1.79512	1	1	3.47044	no	0.652285	1	1	1.57166	no	-1.23593	1	1	0.424569	no
AC004158.2	XLOC_020104	16:72459383-72698908	1.44139	1	1	2.71582	no	0.736359	1	1	1.66597	no	2.72529	1	1	6.61293	no	1.54129	1	1	2.91055	no
-	XLOC_046280	7:73694827-73695871	1.44119	1	1	2.71545	no	2.00569	0.0509	0.311033	4.01581	no	-2.22058	1	1	0.214555	no	-0.039838	1	1	0.972764	no
RP11-94L15.2	XLOC_022276	17:37913973-37920089	1.43949	1	1	2.71225	no	1.17101	1	1	2.25169	no	0.821233	1	1	1.76692	no	0.96122	1	1	1.94696	no
-	XLOC_050221	9:128172734-128175054	1.43888	0.02265	0.235909	2.7111	no	1.36068	0.0245	0.185877	2.56806	no	1.14415	0.0735	0.538703	2.21016	no	0.467262	1	1	1.38248	no
-	XLOC_036595	4:15920218-15935043	1.43866	0.00345	0.0655863	2.71069	no	1.14086	0.0126	0.113563	2.20512	no	1.13654	0.0194	0.270957	2.19853	no	-0.498709	1	1	0.70774	no
PCDHB7	XLOC_039852	5:140474213-140571220	1.43812	1	1	2.70968	no	-0.496614	1	1	0.708768	no	-0.269746	1	1	0.829466	no	-0.271868	1	1	0.828246	no
MRGPRX3	XLOC_007503	11:18142501-18160027	1.4379	0.01825	0.204669	2.70926	no	1.83578	0.00285	0.0363256	3.56964	yes	0.0973595	1	1	1.06981	no	0.377806	1	1	1.29936	no
CYP4F11	XLOC_025775	19:16023126-16045677	1.43734	0.00705	0.10736	2.70821	no	2.0229	0.0002	0.00389186	4.064	yes	0.793362	1	1	1.73311	no	0.139261	1	1	1.10134	no
RNF224	XLOC_050435	9:140122017-140124090	1.43689	1	1	2.70737	no	2.13032	1	1	4.37815	no	0.799166	1	1	1.74009	no	1.00661	1	1	2.00918	no
RP5-1091N2.2	XLOC_058377	X:70263063-70265320	1.4368	1	1	2.7072	no	0.588474	1	1	1.50366	no	-0.00249745	1	1	0.99827	no	0.0675635	1	1	1.04795	no
-	XLOC_047819	8:103668483-103698101	1.43616	1	1	2.706	no	1.20897	1	1	2.31173	no	-0.328832	1	1	0.796181	no	0.690971	1	1	1.61437	no
KNDC1	XLOC_006145	10:134973882-135039916	1.43548	0.052	0.395939	2.70472	no	1.83063	0.0154	0.132031	3.55692	no	-1.33127	1	1	0.397418	no	0.120734	1	1	1.08729	no
-	XLOC_031071	20:296724-298421	1.43531	0.0497	0.387398	2.7044	no	1.42285	0.0371	0.251304	2.68115	no	1.36437	1	1	2.57464	no	0.433235	1	1	1.35026	no
UBOX5-AS1	XLOC_030479	20:3087558-3140842	1.43356	1	1	2.70112	no	#N/A	#N/A	#N/A	#N/A	#N/A	#N/A	#N/A	#N/A	#N/A	#N/A	2.12932	1	1	4.37511	no
HRH2	XLOC_040114	5:175085032-175137625	1.43282	1	1	2.69974	no	1.07472	1	1	2.10631	no	1.1009	1	1	2.14488	no	0.285592	1	1	1.21891	no
MEI1	XLOC_032919	22:42095502-42195460	1.43249	1	1	2.69912	no	1.35014	1	1	2.54937	no	-1.45661	1	1	0.364348	no	#N/A	#N/A	#N/A	#N/A	#N/A
RASGRF1	XLOC_017891	15:79252288-79383115	1.4318	0.13705	0.647519	2.69783	no	2.43026	0.01355	0.119658	5.38991	no	-0.405358	1	1	0.755049	no	0.379707	1	1	1.30108	no
SMPD3	XLOC_020036	16:68344876-68482591	1.43144	1	1	2.69716	no	1.92085	0.00245	0.0321379	3.78646	yes	1.25014	1	1	2.37865	no	1.29709	1	1	2.45733	no
WNT8B	XLOC_005889	10:102222797-102243501	1.43048	1	1	2.69536	no	2.5463	1	1	5.84134	no	2.49948	1	1	5.65482	no	1.99296	1	1	3.98053	no
RP11-679I18.4	XLOC_008701	11:129910259-129913856	1.42948	1	1	2.6935	no	1.91771	0.2778	0.767095	3.77823	no	1.76252	0.2831	0.840055	3.3929	no	2.14366	0.20965	0.999777	4.41882	no
RP1-238O23.4	XLOC_043461	6:40994771-41108571	1.42838	0.4306	0.951032	2.69144	no	0.399964	0.8148	0.996063	1.31947	no	0.0797946	1	1	1.05687	no	-3.0089	1	1	0.124231	no
CTD-3193K9.4	XLOC_021015	17:40830906-40852006	1.42726	0.5361	0.988204	2.68935	no	1.51821	0.59575	0.973647	2.86435	no	0.0575984	1	1	1.04073	no	-0.523763	1	1	0.695555	no
-	XLOC_032286	21:40392095-40393440	1.42695	1	1	2.68878	no	0.896233	1	1	1.8612	no	1.44723	1	1	2.72684	no	1.24138	1	1	2.36425	no
RP11-388P9.2	XLOC_005531	10:61788084-62493248	1.42356	1	1	2.68247	no	1.98471	1	1	3.95783	no	1.99738	1	1	3.99274	no	2.60049	1	1	6.06493	no
RP11-680F20.12	XLOC_008672	11:125820010-125933230	1.42085	1	1	2.67743	no	0.911102	1	1	1.88048	no	#N/A	#N/A	#N/A	#N/A	#N/A	-1.15425	1	1	0.4493	no
PARM1	XLOC_036974	4:75858304-75975325	1.4204	1	1	2.6766	no	1.5417	1	1	2.91137	no	0.839132	1	1	1.78897	no	-0.20455	1	1	0.867809	no
-	XLOC_012984	13:25328417-25329153	1.41997	1	1	2.6758	no	0.871432	1	1	1.82948	no	1.27989	1	1	2.4282	no	0.710409	1	1	1.63627	no
TMC5	XLOC_018426	16:19421817-19510435	1.41902	0.1516	0.677959	2.67404	no	-1.03913	0.27905	0.768052	0.486621	no	-0.970431	1	1	0.510354	no	-1.38927	1	1	0.381758	no
GRASP	XLOC_010774	12:52400723-52409673	1.41776	1	1	2.6717	no	2.14671	1	1	4.42817	no	-2.26329	1	1	0.208296	no	1.18067	1	1	2.26682	no
TULP1	XLOC_043406	6:35465650-35480715	1.41731	1	1	2.67087	no	0.218651	1	1	1.16365	no	0.2253	1	1	1.16902	no	1.81554	1	1	3.51991	no
HCST	XLOC_024763	19:36393381-36395279	1.41715	1	1	2.67057	no	1.46233	0.29085	0.781215	2.75553	no	0.266947	1	1	1.20326	no	-0.504591	1	1	0.70486	no
MIR181A2HG	XLOC_050207	9:127279581-127535206	1.41545	1	1	2.66743	no	1.33672	1	1	2.52576	no	2.17837	1	1	4.52642	no	2.01841	1	1	4.05137	no
LA16c-349E10.1	XLOC_019230	16:691812-818865	1.41543	1	1	2.66739	no	0.516625	1	1	1.4306	no	0.560723	1	1	1.47501	no	-0.254053	1	1	0.838537	no
AC008281.1	XLOC_028325	2:220603326-220782574	1.41455	0.19815	0.753577	2.66577	no	-0.123725	1	1	0.917815	no	1.39631	0.22015	0.793462	2.63227	no	1.35601	1	1	2.55976	no
STAT4	XLOC_029999	2:191886251-192016322	1.41312	0.01	0.137258	2.66312	no	0.963592	0.07205	0.39092	1.95016	no	-0.244007	1	1	0.844397	no	-0.387971	1	1	0.764204	no
KAZALD1	XLOC_005899	10:102821044-102827888	1.41239	0.0036	0.0674627	2.66178	no	1.66284	0.00085	0.0134723	3.16639	yes	0.773601	0.1064	0.616464	1.70953	no	0.969823	0.05815	0.68216	1.9586	no
CRISPLD2	XLOC_019130	16:84853589-84954374	1.41146	0.00635	0.0997453	2.66006	no	3.17316	5e-05	0.00116756	9.0202	yes	0.0365701	1	1	1.02567	no	0.768619	1	1	1.70364	no
RP11-100L22.2	XLOC_048874	8:93711969-93891730	1.41038	1	1	2.65807	no	1.66494	1	1	3.171	no	1.71515	1	1	3.28331	no	-0.0307689	1	1	0.978898	no
NSG1	XLOC_036474	4:4349866-4639631	1.40996	0.0762	0.485205	2.6573	no	2.88162	0.00045	0.00778592	7.36977	yes	-0.332212	0.6878	0.994059	0.794318	no	-0.572149	0.48355	0.999777	0.672614	no
-	XLOC_044236	6:160090108-160091244	1.4092	1	1	2.6559	no	1.06726	1	1	2.09545	no	0.985983	1	1	1.98066	no	0.838299	1	1	1.78794	no
DICER1-AS1	XLOC_014903	14:95552564-95646263	1.40903	0.1808	0.726565	2.65559	no	1.50326	0.17985	0.644217	2.83483	no	1.23609	0.23305	0.801409	2.35559	no	0.360825	0.72305	0.999777	1.28416	no
ASB16	XLOC_021060	17:42247814-42264085	1.40769	1	1	2.65312	no	0.591641	1	1	1.50696	no	-0.401615	1	1	0.75701	no	0.406332	1	1	1.32531	no
RP11-332J15.3	XLOC_038940	5:6766003-6777841	1.40756	0.076	0.484571	2.65288	no	1.62656	0.0357	0.245407	3.08776	no	-0.406247	1	1	0.754584	no	-1.75063	1	1	0.297172	no
ACP5	XLOC_025669	19:11670188-11729950	1.40684	0.05015	0.389227	2.65156	no	1.6557	0.01265	0.11388	3.15076	no	-0.0463684	0.9533	0.994059	0.968371	no	-0.416522	0.58265	0.999777	0.749229	no
CPLX3,LMAN1L	XLOC_016880	15:75105056-75124141	1.40499	1	1	2.64816	no	4.96436	1	1	31.2192	no	-0.502408	1	1	0.705928	no	#N/A	#N/A	#N/A	#N/A	#N/A
MYLK-AS1	XLOC_034373	3:123304388-123603178	1.40471	0.1546	0.683557	2.64765	no	0.514076	0.5417	0.954617	1.42808	no	0.806342	0.38295	0.90827	1.74877	no	0.685932	0.4728	0.999777	1.60874	no
RP11-557H15.2	XLOC_042699	6:134749377-134841723	1.40083	1	1	2.64053	no	0.341463	1	1	1.26704	no	0.822566	1	1	1.76855	no	-0.0269293	1	1	0.981507	no
RASAL1	XLOC_012690	12:113536623-113574044	1.39792	0.0028	0.0559497	2.63521	no	2.30464	5e-05	0.00116756	4.94044	yes	0.190891	0.68125	0.993872	1.14147	no	-0.329512	0.51785	0.999777	0.795806	no
-	XLOC_041283	5:148149018-148156485	1.39732	1	1	2.63412	no	2.16148	0.00605	0.065861	4.47374	no	-0.316076	1	1	0.803252	no	-2.76919	1	1	0.146687	no
BBOX1	XLOC_007561	11:27062271-27241660	1.39725	1	1	2.63399	no	1.90006	1	1	3.73229	no	0.405561	1	1	1.3246	no	#N/A	#N/A	#N/A	#N/A	#N/A
RP11-38L15.3	XLOC_005437	10:46897640-46971400	1.39629	0.0411	0.346904	2.63224	no	1.50844	0.01975	0.159239	2.84502	no	0.53145	0.47365	0.94886	1.44538	no	0.840362	0.2659	0.999777	1.7905	no
CCDC11	XLOC_023882	18:47753562-47792892	1.39587	1	1	2.63147	no	1.31758	1	1	2.49248	no	0.519598	1	1	1.43356	no	0.256701	1	1	1.19474	no
GPR55	XLOC_030301	2:231772032-231825781	1.39527	1	1	2.63038	no	4.27005	1	1	19.2936	no	1.34193	1	1	2.5349	no	#N/A	#N/A	#N/A	#N/A	#N/A
RHEBL1	XLOC_012060	12:49458467-49463808	1.39427	0.00455	0.0800789	2.62856	no	1.16169	0.01175	0.108067	2.23719	no	1.33593	0.0066	0.148564	2.52438	no	1.11253	0.02485	0.474504	2.16224	no
AC009495.2	XLOC_027882	2:166651360-166702601	1.39398	1	1	2.62803	no	1.06832	1	1	2.09699	no	1.48513	1	1	2.79942	no	#N/A	#N/A	#N/A	#N/A	#N/A
CCL3	XLOC_022215	17:34400225-34417515	1.3939	1	1	2.62788	no	1.4685	1	1	2.76734	no	1.65272	1	1	3.14426	no	#N/A	#N/A	#N/A	#N/A	#N/A
RP11-1055B8.8	XLOC_022932	17:79369262-79433411	1.39379	0.6343	0.998065	2.62768	no	1.72931	0.5787	0.969234	3.31569	no	0.882754	0.7334	0.994059	1.84389	no	0.591839	0.7736	0.999777	1.50717	no
HTRA3	XLOC_036508	4:8271491-8308838	1.39342	1	1	2.62701	no	4.84869	0.00195	0.0267731	28.8138	yes	-1.40651	1	1	0.377223	no	-0.256294	1	1	0.837236	no
AK8	XLOC_051490	9:135600964-135765588	1.39319	1	1	2.62659	no	1.67902	1	1	3.2021	no	-0.505244	1	1	0.704541	no	0.342358	1	1	1.26783	no
CCDC68	XLOC_023907	18:52568739-52626739	1.39271	1	1	2.62571	no	#N/A	#N/A	#N/A	#N/A	#N/A	1.97446	1	1	3.92981	no	2.31055	1	1	4.96072	no
RP11-81A22.5	XLOC_021709	17:4704453-4710308	1.39172	0.23345	0.792257	2.62391	no	1.13351	0.2987	0.790114	2.19392	no	0.350049	1	1	1.2746	no	1.53487	0.2295	0.999777	2.89762	no
-	XLOC_057928	X:6686939-6687681	1.39058	1	1	2.62184	no	0.68733	1	1	1.6103	no	0.98514	1	1	1.97951	no	0.889649	1	1	1.85273	no
CXCR4	XLOC_029654	2:136871918-136875735	1.38999	1	1	2.62077	no	-0.503677	1	1	0.705307	no	2.46128	1	1	5.50705	no	#N/A	#N/A	#N/A	#N/A	#N/A
FBXO24	XLOC_045137	7:100169854-100205798	1.38989	1	1	2.62059	no	1.33904	1	1	2.52983	no	0.838974	1	1	1.78878	no	0.937084	1	1	1.91465	no
LINC00086	XLOC_057679	X:134555867-134559682	1.38795	1	1	2.61707	no	1.03443	1	1	2.0483	no	0.879811	1	1	1.84013	no	-0.161139	1	1	0.894319	no
-	XLOC_024057	18:77326318-77327034	1.38792	1	1	2.61701	no	3.41282	0.2033	0.680131	10.6503	no	-0.292236	1	1	0.816635	no	#N/A	#N/A	#N/A	#N/A	#N/A
PDE4A	XLOC_024317	19:10501809-10580305	1.38686	0.1361	0.646196	2.61509	no	1.82109	0.05455	0.32528	3.53348	no	0.361701	0.69105	0.994059	1.28494	no	0.282621	0.7434	0.999777	1.2164	no
SLCO5A1	XLOC_048705	8:70584176-70767206	1.38457	1	1	2.61094	no	1.3779	1	1	2.5989	no	1.50664	1	1	2.84147	no	0.856997	1	1	1.81126	no
RP11-616K22.3	XLOC_017501	15:44580908-44719342	1.38448	1	1	2.61078	no	-0.535217	1	1	0.690055	no	#N/A	#N/A	#N/A	#N/A	#N/A	#N/A	#N/A	#N/A	#N/A	#N/A
PNMA2	XLOC_048375	8:26236774-26371608	1.38411	1	1	2.61011	no	1.7932	0.02175	0.171213	3.46583	no	1.44269	1	1	2.71827	no	0.142713	1	1	1.10398	no
CNTD2	XLOC_026133	19:40728114-40732597	1.38296	1	1	2.60803	no	2.33979	0.0023	0.0304312	5.06229	yes	1.70519	1	1	3.26072	no	1.60022	1	1	3.0319	no
-	XLOC_007243	11:508013-508910	1.38202	0.1524	0.680065	2.60633	no	0.212221	1	1	1.15847	no	0.0388611	1	1	1.0273	no	0.724948	1	1	1.65284	no
RP13-977J11.5	XLOC_012877	12:132568827-132616344	1.3802	0.58525	0.998065	2.60304	no	0.367024	0.7404	0.992707	1.28969	no	-0.974824	1	1	0.508802	no	1.49111	0.545	0.999777	2.81105	no
-	XLOC_046977	7:156730141-156733704	1.37973	1	1	2.6022	no	2.37936	0.00135	0.0196837	5.20306	yes	0.866299	1	1	1.82298	no	0.0874844	1	1	1.06252	no
SLC6A2	XLOC_018825	16:55689515-55740104	1.37963	1	1	2.60202	no	0.538188	1	1	1.45215	no	2.19159	5e-05	0.00369973	4.56809	yes	1.23389	1	1	2.352	no
RP11-525A16.1	XLOC_007046	10:112188597-112255954	1.37927	0.1325	0.637684	2.60137	no	2.16084	0.02465	0.186368	4.47175	no	0.375603	1	1	1.29738	no	-0.38387	1	1	0.766379	no
CCT6B	XLOC_022173	17:33254877-33448541	1.3791	1	1	2.60106	no	0.964508	1	1	1.9514	no	1.3754	1	1	2.5944	no	0.59816	1	1	1.51378	no
-	XLOC_042182	6:43690522-43737745	1.37883	0.5961	0.998065	2.60057	no	2.10035	0.4465	0.908866	4.28813	no	0.111618	1	1	1.08044	no	-0.151663	1	1	0.900212	no
-	XLOC_017334	15:30712813-30713436	1.37833	1	1	2.59967	no	1.02852	1	1	2.03993	no	-0.00996877	1	1	0.993114	no	-1.58973	1	1	0.332234	no
KRT5	XLOC_012132	12:52908357-52914471	1.377	0.0048	0.0826686	2.59728	no	1.07433	0.0106	0.100017	2.10574	no	1.19201	0.0086	0.173133	2.28471	no	0.987086	0.0541	0.668005	1.98218	no
TP73-AS1	XLOC_002689	1:3547330-3663920	1.37643	0.087	0.524376	2.59625	no	1.10636	0.19825	0.672634	2.15302	no	1.19975	0.14115	0.691391	2.297	no	0.898681	0.3012	0.999777	1.86436	no
AKD1	XLOC_043907	6:109809108-110012420	1.37554	0.01985	0.216732	2.59465	no	1.22429	0.03145	0.223838	2.3364	no	1.18064	0.03285	0.360878	2.26677	no	0.0676774	1	1	1.04803	no
PACSIN1	XLOC_042045	6:34433915-34503006	1.37543	0.0167	0.192356	2.59445	no	2.73415	5e-05	0.00116756	6.65367	yes	-1.08194	1	1	0.472393	no	-1.57585	1	1	0.335445	no
AC010894.3	XLOC_027940	2:175352116-175353028	1.37527	0.36865	0.920083	2.59416	no	0.775748	1	1	1.71208	no	-0.474557	1	1	0.719688	no	0.862745	1	1	1.8185	no
RP11-52J3.2	XLOC_044213	6:158244280-158366109	1.37455	0.54515	0.991732	2.59287	no	0.23127	1	1	1.17387	no	1.67287	0.4859	0.953455	3.18848	no	-0.441219	1	1	0.736512	no
CTD-3138B18.5	XLOC_025377	19:58739959-58827023	1.37297	0.63405	0.998065	2.59003	no	1.03252	0.66185	0.983484	2.04559	no	1.75542	0.5346	0.965288	3.37625	no	1.89476	0.5248	0.999777	3.7186	no
MYH7B	XLOC_030726	20:33563205-33680674	1.37285	1	1	2.58982	no	1.44364	1	1	2.72006	no	1.63192	1	1	3.09925	no	1.36488	1	1	2.57555	no
CHST1	XLOC_009181	11:45670426-45687172	1.37272	1	1	2.58958	no	0.684814	1	1	1.60749	no	-1.84875	1	1	0.277633	no	-2.7777	1	1	0.145824	no
RP11-305N23.1	XLOC_008583	11:119252487-119397374	1.3725	1	1	2.58919	no	1.69809	0.04355	0.279693	3.24471	no	0.483168	1	1	1.39781	no	0.576426	1	1	1.49115	no
RP3-395M20.3	XLOC_002673	1:2357418-2437200	1.37101	0.58925	0.998065	2.58652	no	1.33138	0.59985	0.973647	2.51643	no	0.829796	1	1	1.77743	no	0.326206	1	1	1.25371	no
GNAZ	XLOC_032656	22:23401592-23487208	1.37094	0.0902	0.533711	2.58639	no	2.21165	0.01255	0.113246	4.63205	no	-0.305424	1	1	0.809204	no	0.0996533	1	1	1.07152	no
VASH1	XLOC_014777	14:77228531-77292589	1.37038	0.0511	0.392358	2.58539	no	1.30224	0.0719	0.390384	2.46611	no	0.620299	0.4076	0.921677	1.53719	no	0.725968	0.3532	0.999777	1.65401	no
ATOH8	XLOC_027250	2:85978466-86015189	1.36929	1	1	2.58343	no	4.32101	1	1	19.9873	no	#N/A	#N/A	#N/A	#N/A	#N/A	#N/A	#N/A	#N/A	#N/A	#N/A
PCOLCE-AS1	XLOC_046499	7:100169854-100205798	1.36862	1	1	2.58223	no	0.422578	1	1	1.34032	no	1.18081	1	1	2.26704	no	-0.107174	1	1	0.928405	no
CTC-360G5.9	XLOC_026106	19:39405904-39466550	1.368	1	1	2.58112	no	0.928697	1	1	1.90356	no	1.49091	1	1	2.81066	no	2.1396	1	1	4.4064	no
-	XLOC_020455	17:8207402-8208304	1.36776	0.12305	0.619403	2.5807	no	1.26167	0.13645	0.559518	2.39773	no	0.904326	1	1	1.87167	no	0.220794	1	1	1.16537	no
SLC2A14	XLOC_011676	12:7917811-8250367	1.36669	1	1	2.57878	no	0.922557	1	1	1.89547	no	1.36512	1	1	2.57598	no	-1.00895	1	1	0.496908	no
DNALI1	XLOC_000587	1:38022519-38061536	1.36467	1	1	2.57517	no	3.68506	1	1	12.8622	no	#N/A	#N/A	#N/A	#N/A	#N/A	#N/A	#N/A	#N/A	#N/A	#N/A
TNFSF8	XLOC_051319	9:117656002-117692697	1.36126	1	1	2.56909	no	1.61699	1	1	3.06734	no	1.58365	1	1	2.99727	no	-0.0262956	1	1	0.981938	no
CTC-241N9.1	XLOC_040189	5:179224596-179334859	1.3607	0.46535	0.966536	2.5681	no	0.695495	1	1	1.61944	no	1.4847	0.4507	0.94196	2.79859	no	0.729413	1	1	1.65796	no
CMPK2	XLOC_028574	2:6980700-7038370	1.3596	0.02125	0.226881	2.56614	no	1.44719	0.00955	0.0925648	2.72676	no	1.81298	0.00455	0.118752	3.51367	no	0.402074	0.48175	0.999777	1.32141	no
HSD17B2	XLOC_019106	16:82068608-82173236	1.35859	0.00625	0.0986028	2.56434	no	0.685232	0.1319	0.548806	1.60796	no	0.439799	0.35575	0.889541	1.35642	no	0.199474	0.67775	0.999777	1.14828	no
-	XLOC_029849	2:172167807-172169235	1.35828	1	1	2.56379	no	0.936138	1	1	1.9134	no	0.306139	1	1	1.23639	no	-0.649786	1	1	0.637375	no
UPK2	XLOC_008565	11:118754474-118829269	1.35794	0.54235	0.990794	2.56319	no	1.62222	0.51175	0.943705	3.07848	no	0.496589	0.8178	0.994059	1.41087	no	-1.09597	0.54305	0.999777	0.467821	no
-	XLOC_041837	6:27684927-27685700	1.35776	0.15275	0.680251	2.56287	no	0.577415	1	1	1.49217	no	0.566707	1	1	1.48114	no	1.17047	1	1	2.25085	no
RP11-307C12.11	XLOC_004136	1:155006299-155035252	1.3575	1	1	2.56241	no	0.649441	1	1	1.56856	no	0.0776941	1	1	1.05533	no	0.396635	1	1	1.31643	no
RP11-703I16.1	XLOC_023625	18:12031176-12032180	1.35727	1	1	2.562	no	1.86402	1	1	3.64021	no	2.1338	1	1	4.38872	no	1.50959	1	1	2.84729	no
RP1-167A19.5	XLOC_003354	1:54440641-54441704	1.35557	1	1	2.55898	no	0.136599	1	1	1.09931	no	#N/A	#N/A	#N/A	#N/A	#N/A	1.79978	1	1	3.48167	no
DIO3OS,MIR1247	XLOC_015973	14:102018557-102026768	1.35429	0.0156	0.184534	2.55671	no	1.00069	0.0499	0.306391	2.00096	no	0.548793	0.3282	0.871954	1.46286	no	1.74351	0.0051	0.205394	3.34849	no
-	XLOC_057327	X:80101121-80101883	1.3538	0.16365	0.697767	2.55584	no	0.165772	1	1	1.12177	no	1.02238	1	1	2.03127	no	-1.06167	1	1	0.479077	no
7SK	XLOC_031230	20:18269120-18297640	1.35352	0.6415	0.998065	2.55535	no	0.601039	0.7508	0.992707	1.51681	no	-0.271906	1	1	0.828225	no	0.904516	0.7307	0.999777	1.87192	no
C1orf61	XLOC_004173	1:156374043-156400493	1.35116	0.004	0.0729735	2.55117	no	2.80667	5e-05	0.00116756	6.99668	yes	0.869584	0.0438	0.414773	1.82714	no	0.905513	0.0406	0.599012	1.87321	no
-	XLOC_042878	6:159446985-159448632	1.35074	0.15315	0.680264	2.55043	no	0.964233	0.30215	0.79323	1.95103	no	0.321372	1	1	1.24952	no	0.0121497	1	1	1.00846	no
SLC4A9	XLOC_039828	5:139739786-139780952	1.34961	1	1	2.54843	no	1.27715	1	1	2.4236	no	1.56439	1	1	2.95752	no	-1.20032	1	1	0.435179	no
RASAL3	XLOC_025761	19:15562437-15575377	1.34912	1	1	2.54757	no	1.06756	1	1	2.09589	no	0.327502	1	1	1.25484	no	1.30888	1	1	2.47749	no
LINC00176	XLOC_031060	20:62588054-62680994	1.34864	1	1	2.54672	no	0.796626	1	1	1.73703	no	1.15954	1	1	2.23386	no	-0.117585	1	1	0.921729	no
-	XLOC_047821	8:103776309-103777015	1.34794	1	1	2.54548	no	3.51154	0.2266	0.707171	11.4046	no	-0.0124761	1	1	0.99139	no	1.31911	1	1	2.49512	no
RP11-770J1.3	XLOC_010084	11:118307204-118473730	1.34783	0.3749	0.924774	2.54529	no	-0.946586	1	1	0.518859	no	-0.360489	1	1	0.778901	no	-0.485946	1	1	0.714029	no
HS3ST6	XLOC_019281	16:1961463-1968441	1.34761	1	1	2.5449	no	3.40052	0.2348	0.717259	10.5599	no	-1.28199	1	1	0.411228	no	#N/A	#N/A	#N/A	#N/A	#N/A
BOK-AS1	XLOC_030422	2:242483817-242513616	1.34544	1	1	2.54108	no	0.730256	1	1	1.65893	no	-0.0106515	1	1	0.992644	no	-0.0059787	1	1	0.995864	no
S100A5	XLOC_004094	1:153509622-153514241	1.34441	0.22275	0.78077	2.53926	no	0.862485	1	1	1.81817	no	0.248323	1	1	1.18783	no	-0.324803	1	1	0.798407	no
CCDC108	XLOC_030211	2:219866936-219906249	1.34355	1	1	2.53775	no	1.73443	1	1	3.32748	no	-0.00346165	1	1	0.997603	no	#N/A	#N/A	#N/A	#N/A	#N/A
AC114812.5	XLOC_030340	2:234526290-234681956	1.34315	1	1	2.53705	no	0.290025	1	1	1.22266	no	0.983688	1	1	1.97751	no	-0.0160306	1	1	0.98895	no
EFEMP2	XLOC_009523	11:65590492-65641063	1.34306	0.09605	0.550974	2.53689	no	1.72787	0.04795	0.299345	3.31238	no	0.80865	0.3179	0.867496	1.75157	no	0.262206	0.74385	0.999777	1.19931	no
FBXO36	XLOC_028370	2:230628556-230878379	1.34261	0.40915	0.939368	2.5361	no	0.979484	0.62085	0.976656	1.97176	no	1.37146	0.44295	0.938056	2.58732	no	1.02994	0.48985	0.999777	2.04194	no
GCFC2	XLOC_027192	2:75873908-75938115	1.34185	0.5483	0.993022	2.53476	no	1.73433	0.4653	0.922219	3.32725	no	-0.166696	1	1	0.890881	no	-0.0689639	1	1	0.953322	no
RP11-108K3.1	XLOC_016655	15:51329684-51630807	1.34103	1	1	2.53332	no	2.41056	1	1	5.31681	no	2.27076	1	1	4.82577	no	2.24579	1	1	4.74297	no
RP11-70L8.1	XLOC_050614	9:21802541-22121096	1.33941	1	1	2.53048	no	0.157386	1	1	1.11526	no	0.344768	1	1	1.26995	no	0.867651	1	1	1.82469	no
KIAA1024	XLOC_016960	15:79724857-79764633	1.33922	1	1	2.53014	no	1.27727	1	1	2.4238	no	1.16023	1	1	2.23493	no	0.938206	1	1	1.91614	no
LEF1-AS1	XLOC_037167	4:108968700-109177992	1.33907	1	1	2.52988	no	0.100334	1	1	1.07202	no	-1.27586	1	1	0.412979	no	-1.43256	1	1	0.370473	no
-	XLOC_005627	10:74061368-74061894	1.33857	1	1	2.52901	no	4.52324	0.2264	0.706992	22.9949	no	2.3947	1	1	5.25868	no	#N/A	#N/A	#N/A	#N/A	#N/A
RP4-639F20.1	XLOC_001119	1:95393121-95428826	1.33721	1	1	2.52662	no	0.723873	1	1	1.65161	no	2.44347	1	1	5.43948	no	0.802688	1	1	1.74435	no
SCGB1B2P	XLOC_026002	19:35067637-35068606	1.33719	1	1	2.52659	no	-1.5525	1	1	0.340919	no	#N/A	#N/A	#N/A	#N/A	#N/A	-0.887586	1	1	0.540518	no
RP11-410L14.2	XLOC_048932	8:100008990-100025272	1.33709	0.1692	0.705016	2.52641	no	1.29817	0.1626	0.613006	2.45917	no	1.86424	0.07385	0.540414	3.64076	no	0.639516	0.5451	0.999777	1.55781	no
AC009237.11	XLOC_029324	2:96201864-96202243	1.33448	0.2502	0.806838	2.52185	no	-0.721067	1	1	0.606649	no	-0.416631	1	1	0.749172	no	0.544849	1	1	1.45887	no
COX6B2,CTD-2105E13.6,FAM71E2	XLOC_026538	19:55851220-55874620	1.33337	0.01565	0.184974	2.51991	no	0.849266	0.0851	0.433146	1.80158	no	0.351126	0.47085	0.947764	1.27556	no	0.235238	0.63215	0.999777	1.1771	no
MYO16	XLOC_013414	13:109248499-109860355	1.33319	1	1	2.51959	no	0.931631	1	1	1.90743	no	0.766645	1	1	1.70131	no	0.0658533	1	1	1.0467	no
-	XLOC_003942	1:147101469-147102508	1.33273	1	1	2.51879	no	0.802772	1	1	1.74445	no	-0.0568353	1	1	0.961371	no	-0.632076	1	1	0.645247	no
GCFC1-AS1	XLOC_031859	21:34100425-34144169	1.33195	1	1	2.51743	no	0.348366	1	1	1.27312	no	0.244507	1	1	1.18469	no	0.948438	1	1	1.92978	no
TSPAN2	XLOC_003813	1:115590631-115632135	1.33153	1	1	2.51669	no	1.12845	0.122	0.52656	2.18624	no	0.790852	1	1	1.7301	no	-0.170003	1	1	0.888841	no
RP11-64K12.8	XLOC_017428	15:40731919-40760572	1.33062	0.62475	0.998065	2.51511	no	0.363639	0.8665	0.996063	1.28667	no	0.403761	1	1	1.32295	no	0.972311	0.70795	0.999777	1.96198	no
C11orf20,KCNK4	XLOC_007990	11:64058773-64072242	1.33023	0.007	0.106824	2.51443	no	0.757597	0.12725	0.53884	1.69067	no	0.433321	0.38265	0.908142	1.35034	no	0.98419	0.05745	0.680267	1.9782	no
RP11-187C18.2	XLOC_049690	9:45484571-45488153	1.32944	1	1	2.51305	no	3.05788	0.259	0.746347	8.32748	no	1.27259	1	1	2.41595	no	2.1025	1	1	4.29453	no
SLC25A41	XLOC_025553	19:6426047-6433790	1.32795	1	1	2.51046	no	1.51249	1	1	2.85302	no	1.456	1	1	2.74347	no	-0.367901	1	1	0.774909	no
C1orf192	XLOC_004283	1:161284046-161337664	1.32761	0.61445	0.998065	2.50987	no	1.80195	0.4045	0.87956	3.48691	no	1.31822	0.62005	0.979509	2.49358	no	0.796123	0.7471	0.999777	1.73643	no
2016-03-02	XLOC_002310	1:220921566-220958150	1.32759	0.0097	0.134544	2.50983	no	0.651014	02:57:02.880000	0.528236	1.57027	no	1.26471	0.00905	0.179082	2.40279	no	0.777393	0.1287	0.896886	1.71403	no
ERP27	XLOC_011804	12:15066968-15092016	1.32738	0.0815	0.504951	2.50947	no	1.69572	0.02355	0.181734	3.23939	no	0.715983	1	1	1.6426	no	1.32075	0.0981	0.821691	2.49796	no
KANK3	XLOC_025593	19:8367010-8408146	1.3272	0.2508	0.80791	2.50915	no	1.28119	0.2261	0.706992	2.43039	no	0.15667	0.8899	0.994059	1.11471	no	0.142832	0.9084	0.999777	1.10407	no
-	XLOC_009513	11:65342911-65343323	1.32627	1	1	2.50754	no	3.3827	0.2269	0.707421	10.4302	no	2.15176	1	1	4.4437	no	0.319443	1	1	1.24785	no
MANEA-AS1	XLOC_043834	6:96023058-96025326	1.32373	1	1	2.50312	no	0.830568	1	1	1.77839	no	1.68309	1	1	3.21115	no	1.59609	1	1	3.02323	no
KCNE1	XLOC_032242	21:35818987-35884573	1.32343	1	1	2.5026	no	2.65444	1	1	6.29602	no	0.827714	1	1	1.77487	no	#N/A	#N/A	#N/A	#N/A	#N/A
NCF4	XLOC_032833	22:37243414-37274057	1.32335	0.0575	0.419069	2.50247	no	1.77264	0.00995	0.0953542	3.41679	no	1.52016	0.03165	0.355341	2.86823	no	0.0872125	1	1	1.06232	no
-	XLOC_043800	6:88456471-88457747	1.32335	1	1	2.50247	no	0.229318	1	1	1.17228	no	-0.550059	1	1	0.682992	no	0.318527	1	1	1.24706	no
U3	XLOC_021065	17:42376626-42396039	1.32319	0.62335	0.998065	2.50219	no	0.369054	0.79485	0.995511	1.29151	no	0.245468	0.72225	0.994059	1.18548	no	0.233214	0.73335	0.999777	1.17545	no
GNG7	XLOC_025469	19:2511216-2702707	1.32315	0.01085	0.144803	2.50212	no	2.24705	5e-05	0.00116756	4.74711	yes	0.112753	1	1	1.08129	no	-0.23359	1	1	0.850516	no
HSD17B6	XLOC_010897	12:57106208-57181574	1.32216	0.15505	0.684292	2.5004	no	1.31318	0.2178	0.697644	2.48489	no	0.98188	0.319	0.867826	1.97504	no	1.47659	0.12105	0.876529	2.7829	no
C6orf164	XLOC_042427	6:88106839-88109467	1.32199	1	1	2.50011	no	#N/A	#N/A	#N/A	#N/A	#N/A	1.37964	1	1	2.60203	no	0.122077	1	1	1.0883	no
ITGB1BP2	XLOC_057244	X:70521583-70525221	1.32127	1	1	2.49886	no	1.18115	1	1	2.26757	no	0.0528779	1	1	1.03733	no	0.318831	1	1	1.24732	no
LRRC73	XLOC_043502	6:43474706-43543812	1.31944	0.3763	0.924839	2.49569	no	1.62987	0.29355	0.783155	3.09485	no	1.2936	0.37655	0.904383	2.45139	no	0.3102	1	1	1.23988	no
KLHL10	XLOC_020994	17:39981334-40004636	1.31591	1	1	2.48959	no	2.45537	1	1	5.48454	no	0.977539	1	1	1.9691	no	#N/A	#N/A	#N/A	#N/A	#N/A
RP11-358M11.2	XLOC_016696	15:57592562-57599959	1.31571	1	1	2.48925	no	1.57334	1	1	2.97593	no	1.1681	1	1	2.24716	no	0.778105	1	1	1.71488	no
ALMS1-IT1	XLOC_027154	2:73612885-73837920	1.31529	0.4453	0.955932	2.48852	no	0.710552	1	1	1.63643	no	1.62014	0.3225	0.867826	3.07405	no	1.45275	0.40595	0.999777	2.73729	no
CHRNB4	XLOC_017885	15:78915606-79027837	1.31479	0.0051	0.0861936	2.48766	no	2.09829	5e-05	0.00116756	4.28202	yes	-0.648027	1	1	0.638152	no	-0.15735	1	1	0.896671	no
PNPLA1	XLOC_042084	6:36210979-36276458	1.31311	1	1	2.48477	no	2.64717	0.0011	0.0167408	6.26437	yes	-1.10337	1	1	0.465428	no	-1.60981	1	1	0.327641	no
MIR4519	XLOC_018584	16:30844946-30906541	1.31254	1	1	2.48378	no	1.105	1	1	2.15099	no	1.29526	1	1	2.45421	no	0.244858	1	1	1.18498	no
FAM132A	XLOC_002639	1:1177825-1182102	1.31179	1	1	2.48249	no	2.71788	0.00665	0.0706332	6.57905	no	-0.165051	1	1	0.891897	no	-0.0924881	1	1	0.937904	no
ZNF711	XLOC_057349	X:84498996-84528368	1.31169	1	1	2.48232	no	1.94798	0.062	0.355831	3.85834	no	1.09281	1	1	2.13289	no	1.06037	1	1	2.08547	no
MIR34A	XLOC_002743	1:9208124-9211836	1.31108	1	1	2.48127	no	2.04612	0.04885	0.303231	4.12994	no	0.349871	1	1	1.27445	no	-0.755017	1	1	0.592539	no
[truncated: 53,362 more rows]

## Sheet: Heatmap
Heatmap		Top 500 genes that have the largest coefficient of variation based on FPKM (Fragments Per Kilobase of transcript per Million mapped reads)
Gene	Gene id	locus	vector_1	vector_2	Tcf7l1WT_1	Tcf7l1WT_2	Tcf7l1ΔN_1	Tcf7l1ΔN_2	Tcf7l1ΔG_1	Tcf7l1ΔG_2	Tcf7l1*_1	Tcf7l1*_2
CDKN1C	XLOC_008805	11:2904442-2907111	1.73167	2.74477	5.59335	5.9863	6.90354	6.84446	2.61425	3.13891	1.95896	2.45111
RRAD	XLOC_019991	16:66955581-66959547	0.460659	1.94923	6.14079	6.25757	7.42344	7.68147	2.04501	2.10363	1.17805	1.40232
DLL1	XLOC_044310	6:170591293-170716153	2.33181	2.32601	3.8992	4.01804	4.44923	4.35388	2.56373	2.82836	2.44713	2.10222
CCDC88B	XLOC_007994	11:64107694-64125006	2.03969	2.09566	3.63691	3.60197	4.2448	4.31507	2.28724	2.456	2.16717	2.26309
RAMP1	XLOC_028462	2:238767535-238820756	2.60615	2.64811	4.41859	4.89071	4.89376	5.32475	2.15611	3.02928	2.51134	2.69212
MEST	XLOC_045367	7:130126045-130148500	5.48176	4.91195	7.44368	7.28733	8.14499	8.25889	5.46879	5.68996	5.11174	5.39167
MMP9	XLOC_030860	20:44637546-44688789	4.5994	4.4011	8.38555	8.07612	9.37877	9.29986	5.34762	5.49167	4.16875	4.11016
FBLN2	XLOC_033634	3:13573823-13679922	1.77064	0.688207	4.12873	4.6626	4.82987	5.08047	1.30403	2.1618	0.840902	1.16897
C14orf80,CRIP1	XLOC_015156	14:105952653-105965912	5.48599	5.99275	6.99941	7.39563	7.59424	7.85166	5.86748	5.79313	6.00056	6.00519
TIMP1	XLOC_057009	X:47420512-47479252	6.97635	7.09512	8.47207	8.80115	9.55126	10.2946	6.93878	7.25777	6.37161	6.50774
THEMIS2	XLOC_000460	1:28199054-28213196	1.86494	2.24979	3.04538	3.73145	4.07556	4.73298	1.75246	2.29797	1.32996	1.73969
HR	XLOC_048329	8:21971886-21990897	3.6602	3.45208	4.7479	4.97903	5.28954	5.63472	3.51054	3.64114	2.82711	3.16007
SNCG	XLOC_005755	10:88695296-88784489	3.84892	3.49301	5.20033	5.71311	5.84199	6.19874	3.34388	3.95905	2.46469	3.51386
MARCKSL1	XLOC_003077	1:32799431-32801980	4.20888	3.95267	5.08726	6.26878	5.82272	6.91876	4.03846	4.02055	3.432	3.76495
RP11-404P21.2	XLOC_015919	14:96671015-96735304	1.929	2.08662	3.12816	3.96135	3.68941	4.44032	2.35856	2.10543	1.71087	2.31372
BTG2	XLOC_002143	1:203274618-203278730	3.71359	3.98965	4.75528	5.36513	5.43593	6.4688	4.19791	4.24943	3.47477	3.26325
DLX3	XLOC_022550	17:48067368-48072588	1.7562	1.28718	2.67653	2.85274	3.24229	3.57422	1.98596	1.92297	1.23944	1.42025
GATA2	XLOC_035823	3:128198269-128222002	0.296228	0.488073	2.0782	2.36173	3.44294	4.13367	1.23476	0.455933	0.0491568	0.550507
KRT80	XLOC_012117	12:52562779-52585784	3.26651	3.4435	5.39965	6.03025	5.84892	6.71266	4.04714	4.17183	3.29355	3.64548
ZNF323	XLOC_043197	6:28292469-28337051	1.01966	1.22946	2.59963	3.25788	3.59144	4.05204	1.95076	1.91839	1.74001	1.13672
NRARP	XLOC_051593	9:140194082-140196703	0.764609	1.54873	2.19448	2.65178	3.08167	3.25521	1.77053	1.79248	1.40018	1.52527
BDKRB1,BDKRB2,RP11-404P21.8	XLOC_014915	14:96671015-96735304	2.80703	2.32212	3.83853	4.72967	4.34979	5.42568	2.6509	3.37185	2.64674	3.12052
PIK3R3,RP11-322N21.2	XLOC_003265	1:46505811-46651633	1.39579	0.703083	2.1237	3.20501	2.78855	3.79219	1.55311	1.65245	0.795742	1.53319
RP11-1082L8.3	XLOC_049116	8:125842430-125974396	0.394898	0.550477	3.33461	3.61189	3.5416	3.55881	0.818613	1.42368	0.383541	1.34042
C3	XLOC_025562	19:6677714-6737614	6.02993	5.91904	7.33553	7.77349	7.74005	7.99699	5.95365	6.54405	5.48851	5.92018
CTSD,IFITM10,RP11-295K3.1	XLOC_008784	11:1753639-1785255	5.93843	6.29898	7.08131	7.5214	7.19132	7.51963	5.77538	6.34286	5.5972	5.92742
CTSH	XLOC_017890	15:79213399-79241916	2.51599	2.26022	4.24159	4.66625	5.28495	5.87032	1.82467	3.00074	1.80108	1.45799
UCA1	XLOC_024452	19:15937854-15947865	1.85634	1.19346	3.73451	4.55852	4.33199	4.79453	2.49889	2.46147	1.40239	1.70473
ALDH3B2	XLOC_009579	11:67429628-67448671	2.67014	1.63888	3.24031	3.85408	3.68833	3.97033	2.00748	2.88904	1.78635	1.83578
P2RY6	XLOC_008194	11:72975362-73010549	1.86964	1.20091	3.02288	3.29352	3.41796	4.06198	1.7212	2.7012	1.34955	0.923689
PTAFR	XLOC_003024	1:28473459-28520459	3.78806	3.72327	4.62366	4.90408	5.10744	5.42684	2.80313	3.41695	2.3316	2.34266
VASN	XLOC_018287	16:4364761-4475706	1.62104	1.33266	2.70706	2.78034	3.42809	3.54106	0.910901	0.807157	0.343226	0.260387
PLCD1	XLOC_035219	3:38048986-38071253	2.40731	2.61862	3.03611	3.13541	3.25301	3.94266	2.03293	2.05112	1.42732	1.80084
PFKFB4,UCN2	XLOC_035339	3:48555116-48601206	4.77363	4.21356	5.31668	5.44125	5.8379	5.79313	3.71529	4.43667	3.81524	4.07439
S100A3,S100A4	XLOC_004095	1:153516088-153533035	3.70757	3.86632	5.73671	7.09781	6.56149	7.69098	3.44443	4.18486	3.11762	3.82071
PSCA	XLOC_048039	8:143733501-143764142	2.82096	3.27627	4.80549	5.86841	5.39754	6.21091	2.08604	3.18713	1.55434	2.07535
AQP3	XLOC_050678	9:33441151-33447609	3.75408	2.71307	7.37659	7.61416	8.50315	8.95915	2.99857	2.57595	2.56068	2.45099
AP002380.1,C11orf9	XLOC_007937	11:61447904-61634826	2.40924	1.75252	3.10453	3.0433	3.62722	3.71062	1.82353	1.39964	1.56573	1.46168
CCDC69	XLOC_041322	5:150560605-150650001	2.35371	1.51913	2.69355	2.80382	3.22672	3.21835	1.33281	1.35563	1.57417	1.14403
NCCRP1	XLOC_024830	19:39687600-39692524	2.45939	3.17171	3.89975	4.5408	4.52616	5.38616	2.62335	2.62904	1.22043	2.12282
MYH14	XLOC_025087	19:50691442-50813802	1.62753	2.00921	2.85479	3.46516	3.51382	3.88461	1.80318	1.66931	1.00136	1.23781
CRABP2	XLOC_004185	1:156669397-156675612	4.90994	4.14437	5.84593	6.31648	6.56809	6.93909	4.43506	4.62645	3.26294	3.41484
HID1	XLOC_022813	17:72946837-72971823	2.46221	2.61547	3.39789	3.56164	4.01411	3.72099	1.98179	1.87255	1.53253	1.10877
CXXC5	XLOC_039819	5:139026883-139063467	3.99278	3.77546	4.48114	4.90205	4.77817	5.33662	3.31902	3.73395	3.52946	3.93086
KLK6	XLOC_026407	19:51446558-51515385	2.25327	2.23098	4.43286	5.58131	5.99669	7.41111	1.04822	1.6133	0.517326	1.68394
RAB26	XLOC_018225	16:2190803-2204166	1.81787	2.18517	3.29986	3.41641	4.15835	3.81377	2.28001	1.72896	1.58471	1.71149
ENTPD2	XLOC_051580	9:139942549-139948532	1.20916	1.58907	2.23025	2.24188	3.05833	2.8677	1.29484	1.16587	1.32084	0.855511
SLCO4A1	XLOC_031021	20:61272070-61317137	0.776517	1.92224	2.59452	2.704	3.83641	3.89263	2.18133	1.65537	0.693766	0.976657
PDE2A	XLOC_009672	11:72287184-72385635	0.383486	1.36116	3.10276	2.34194	3.43353	3.26884	1.68572	1.37379	0.27274	0.571628
AC092535.1,SPON2	XLOC_037693	4:1160719-1202750	1.00118	1.29964	2.20113	2.15154	2.94238	2.65092	1.1534	1.27405	0.843292	0.649827
CLIP2	XLOC_044931	7:73703796-73820273	3.53747	3.63572	4.34643	4.42217	4.88764	5.03708	3.39287	3.25622	3.33878	3.21536
SAMD14	XLOC_022553	17:48172100-48207246	1.19196	1.13702	1.95626	2.0329	2.52542	2.72495	0.663682	0.55818	0.725558	0.408929
LAT2	XLOC_044930	7:73613981-73644164	3.79434	3.45449	4.75749	5.10723	5.70142	6.17588	2.5951	1.75095	2.12879	1.74273
TJP3	XLOC_024171	19:3708106-3750811	1.98162	2.49124	3.13253	3.23534	4.01647	4.11191	1.35589	1.21717	0.873018	1.3843
RAP1GAP	XLOC_002912	1:21922707-21995801	1.85943	2.14602	2.70401	2.50158	3.17884	2.92045	1.3567	1.4431	1.43479	1.41369
AC104532.2,CAPS,VMAC	XLOC_024218	19:5904851-5915886	2.8151	3.7615	3.93687	3.9056	4.43569	4.49932	2.41181	2.77003	2.41501	2.67872
COL6A1	XLOC_032016	21:47401650-47424964	3.88869	4.22379	4.77697	4.80083	5.46487	5.45104	3.44365	3.51714	3.48929	3.65545
GPSM1	XLOC_050398	9:139221931-139268133	2.74488	3.0811	3.64012	3.62858	4.10066	4.34806	2.53727	1.95139	2.30924	2.27391
SDCBP2	XLOC_031085	20:1290618-1373806	3.05056	3.96043	3.97781	4.16703	4.35609	4.58164	2.73945	2.68812	2.72621	2.82154
WNT9A	XLOC_004838	1:228106356-228135631	1.50312	1.81425	2.49375	2.73925	2.88272	3.40098	0.934162	0.757356	0.292464	1.43857
QSOX1	XLOC_001956	1:180123968-180173165	6.0441	5.63089	6.66832	6.31198	7.39701	7.51385	5.63976	5.61405	5.41753	5.24905
AC009469.1,TNS1	XLOC_030188	2:218664511-218875218	1.92566	1.51585	2.42697	2.07151	3.06127	2.94025	1.50705	1.399	0.764151	1.20343
ATP2A3	XLOC_021691	17:3827161-3867775	1.62072	1.25415	2.77499	2.45423	3.9366	3.62143	1.15104	1.00598	0.509453	0.812654
PODXL	XLOC_046741	7:131185018-131242976	2.77778	1.98207	4.68205	3.44876	5.49342	4.94609	2.09571	1.63261	1.51878	1.90885
SLC6A6	XLOC_033642	3:14444075-14583588	3.31577	3.08197	4.23069	4.3371	4.92655	5.28152	3.19244	2.78983	2.78715	3.00849
AIF1L	XLOC_050319	9:133971844-133998539	1.502	1.36434	2.48136	2.06635	3.53686	3.62785	1.52255	0.999401	0.98604	1.25248
TP73	XLOC_000088	1:3547330-3663920	1.82174	0.839847	2.44321	2.74768	3.02459	3.11053	1.01908	0.943531	1.01705	1.14745
KCNAB2	XLOC_000103	1:5922870-6161253	0.643773	0.267224	2.32184	2.39468	3.01034	2.77023	0.39986	0.400276	0.0986217	0.588958
MMP19	XLOC_012207	12:56137063-56236750	2.71314	2.26217	4.31506	3.75137	5.34827	4.76667	2.16052	1.89786	2.46839	1.839
ALOXE3	XLOC_021781	17:7999217-8022365	1.40339	1.58817	2.72405	2.11766	2.88081	3.08724	1.02403	1.16253	1.53555	0.939001
RET	XLOC_005398	10:43572474-43625799	0.909143	1.20351	1.8313	1.56918	3.47233	3.09853	0.81226	0.825802	0.546196	0.967818
AP000349.1	XLOC_033171	22:24105207-24126503	0.71793	1.10564	1.97426	1.93092	3.27439	2.52165	0.313908	0.705111	0.324212	0.50784
MYO7B	XLOC_027646	2:128293377-128395304	2.18938	1.77106	3.13994	2.65375	3.89105	3.51622	1.50961	1.46207	1.71427	1.71311
MEGF6	XLOC_002683	1:3404379-3528059	0.731461	1.30969	2.26161	2.06061	2.73737	2.09758	0.490242	0.797611	0.537813	1.20609
CNFN	XLOC_026188	19:42891170-42894439	3.37721	3.86739	4.7421	5.04996	6.55809	7.99422	2.85035	3.53287	2.5112	3.83282
HSPA12A	XLOC_007077	10:118423206-118502085	1.88825	1.67267	2.73135	2.80127	3.29271	3.93265	1.29785	1.65296	1.37196	1.79448
AQP1,FAM188B,INMT,INMT-FAM188B	XLOC_044569	7:30692199-30965131	1.44997	1.39019	2.30027	2.41204	4.03254	4.69787	1.30199	1.36999	1.60573	1.30012
ATP1A3	XLOC_026179	19:42470733-42501649	0.36955	0.16021	0.875245	0.861868	2.28004	2.34603	0.249906	0.484396	0.356617	0.823823
CR536603.1,WNT7B	XLOC_033494	22:46316240-46373009	3.61966	3.56343	5.19805	4.65724	5.57137	5.25182	4.14174	3.52736	3.76703	3.32034
C3orf18	XLOC_035392	3:50595461-50623226	1.41788	1.38096	3.55568	3.20829	3.88259	3.90699	2.47083	2.35916	2.22862	1.83021
ITGB2	XLOC_032385	21:46305863-46352271	2.19016	1.85658	3.60838	3.6784	3.75685	3.98225	2.53354	2.81007	2.42385	1.98054
KIF26A	XLOC_015122	14:104604886-104647231	0.389038	1.28819	2.69964	2.50875	2.81213	3.01225	1.63815	1.53774	1.15962	1.30638
PHLDA2	XLOC_008807	11:2949502-2950685	5.85629	5.83623	6.5643	6.91686	7.09598	7.50643	6.09132	5.37684	5.75845	5.26036
ADAMTSL4,AL356356.1,MIR4257	XLOC_001507	1:150521039-150533413	2.25004	1.95917	3.77385	3.30306	4.43473	3.99118	2.87562	2.35028	2.57368	1.98624
PDE4A	XLOC_024317	19:10501809-10580305	1.04534	0.722641	2.50408	2.03695	2.91163	2.52076	1.32368	1.17378	1.40125	0.895621
RAPGEF3	XLOC_012022	12:48099867-48231681	1.8091	1.46665	3.62925	2.9635	3.98744	3.36251	2.3769	1.80585	2.04553	1.00174
PPL	XLOC_019378	16:4932507-5147809	3.20019	2.55582	4.55385	4.63419	4.99194	4.81631	3.58286	3.17668	3.06211	1.84473
PPP1R1B	XLOC_020938	17:37782992-37792879	1.32587	0.769789	3.11187	2.79871	3.59399	3.07494	2.22084	1.6487	1.93506	0.247697
MYEOV,RP11-211G23.2	XLOC_008123	11:69061604-69187279	3.00856	2.02044	3.13872	3.56026	3.57423	4.41086	2.42469	2.48949	2.79511	2.00597
FER1L4	XLOC_031405	20:34146506-34195810	2.95069	1.54647	2.99998	3.21243	3.88573	3.98002	0.830742	1.59546	2.14836	0.954062
CLDN4	XLOC_044923	7:73213871-73247014	4.54207	5.77408	5.68259	6.62428	6.31928	7.55491	5.44944	5.17539	3.71175	4.2897
HES2	XLOC_002708	1:6472477-6484730	1.45274	1.99832	2.12332	2.45305	2.66366	3.30748	1.73626	1.6198	0.770821	1.49199
ALDH3B1	XLOC_008107	11:67776047-67797928	2.5117	3.02148	3.44559	3.74067	4.14265	4.26443	2.25336	2.91032	1.98705	2.62701
ABCC3	XLOC_021201	17:48712137-48769613	1.42333	2.07333	2.49118	3.76037	3.73934	4.34423	1.16465	2.17727	0.00309846	1.29239
CPT1A	XLOC_009604	11:68522087-68611878	1.94562	2.19105	3.06755	3.41252	3.72985	3.83051	2.24616	2.1475	1.7444	2.2456
RASD2	XLOC_032817	22:35936558-35950048	0.0583026	0.654335	2.16774	2.15911	3.10423	3.59439	0.6072	1.00281	0.491771	0.49095
SOCS1	XLOC_019435	16:11343475-11445619	0.484458	1.59602	2.44681	2.98066	3.21535	3.255	1.64237	1.75857	0.660509	1.18319
ARRDC2	XLOC_024507	19:18111940-18142839	1.79892	2.20275	3.02397	4.00833	3.34338	4.59349	2.16037	2.31493	1.74795	1.76088
RP11-465B22.3	XLOC_000034	1:995113-1004735	2.31345	3.4705	3.49339	3.64171	4.05994	4.19777	2.78754	2.17614	1.85123	2.84018
TLE6	XLOC_024153	19:2977443-2995177	1.9942	1.83519	2.62441	3.44905	3.72147	4.1816	2.47736	1.91815	1.62191	1.19367
PGF	XLOC_015747	14:75408536-75422487	1.61335	1.71142	2.26198	2.79257	3.51762	3.69161	2.23699	1.43157	1.57179	0.660308
NR4A1	XLOC_010775	12:52416615-52453291	2.7087	3.37864	3.56596	3.67953	4.31655	4.59463	2.95337	2.69213	2.88257	2.20073
OXTR	XLOC_035022	3:8661085-9005457	0.185727	0.447907	1.07452	1.42431	1.81762	2.87116	1.18626	0.8771	0.514259	0.24018
METRNL	XLOC_021607	17:81037566-81052864	2.43877	3.98221	3.71662	4.10613	4.1316	4.84451	3.29229	2.95627	2.69684	2.40316
PLA2G4C	XLOC_026317	19:48551099-48614086	1.58557	3.40639	2.94548	3.0851	3.37008	3.81692	2.01005	1.98626	1.91165	1.78951
OVOL1	XLOC_008040	11:65554492-65564690	0.737263	2.91157	2.70439	4.04353	3.4243	4.90874	2.81122	2.45388	1.34428	1.64295
RP11-770G2.5	XLOC_009521	11:65554492-65564690	1.2375	2.80656	2.6324	4.02864	3.47258	4.84237	2.81919	2.29558	1.40717	1.39428
HIST3H2A	XLOC_004852	1:228645064-228645560	1.1369	2.37261	2.97786	3.24807	2.93952	3.99299	2.12671	1.71877	1.81707	1.72066
ELF3,RP11-510N19.5	XLOC_002120	1:201951499-201986316	2.26748	3.53717	5.79523	6.82774	5.68593	6.31382	4.02822	4.86255	1.62076	3.07585
TNFRSF18	XLOC_002635	1:1138887-1142071	0.79437	0.888819	2.59051	3.10298	2.95547	3.47432	2.00071	2.22459	0.00832911	0.46379
C10orf10	XLOC_006508	10:45306471-45490172	1.44801	2.37188	3.7777	4.61932	4.42291	4.90592	2.35634	3.81382	1.62701	1.87194
TLR2	XLOC_037435	4:154605271-154627331	0.890727	1.15554	2.90464	3.45904	3.50011	3.93957	1.49488	2.19133	0.718859	1.09328
ISG20	XLOC_017052	15:89179383-89199714	4.1367	4.43916	5.28834	5.83889	5.48833	6.29699	4.0889	5.09738	3.42712	3.84195
SLPI	XLOC_031502	20:43880879-43883205	3.67192	5.3297	7.42105	8.66228	7.90649	9.21983	6.09913	6.77908	3.48029	4.39303
C2,CFB	XLOC_041994	6:31865561-31919861	4.00313	4.58275	7.23301	8.37111	7.54956	8.8289	5.41887	6.83285	4.38616	4.49739
TNFAIP2	XLOC_015099	14:103589649-103603776	5.3805	5.62024	7.871	8.40273	7.75168	8.2597	6.79695	7.17611	5.85718	5.73424
TGM1	XLOC_015312	14:24718319-24733638	1.19939	1.16726	4.42912	6.21324	4.21008	6.37089	3.36952	4.52708	1.75318	0.931895
NDRG1	XLOC_049176	8:134249413-134314265	5.97414	7.08064	8.25897	9.37367	8.43451	8.707	7.33858	8.7234	6.61039	6.88913
KRT16	XLOC_022348	17:39766029-39772151	5.06707	6.31946	8.48127	9.23058	8.79926	9.52261	8.01888	8.44341	6.93863	6.30394
LIF	XLOC_033262	22:30635182-30642907	2.58667	3.13735	5.4014	6.30173	5.76089	6.8539	4.72247	4.1784	3.42093	2.95691
CSF1	XLOC_001238	1:110452863-110473614	2.04997	1.67835	3.93114	4.21539	4.44688	5.21611	3.09074	2.82155	2.53135	1.96609
WNT4	XLOC_002918	1:22446167-22470462	2.43037	1.52858	4.34531	5.2209	4.72285	5.6252	3.40163	3.66416	2.58503	2.04254
NGFR	XLOC_021170	17:47572654-47661189	2.46043	1.24589	4.32238	4.56348	4.96458	5.07585	2.85232	2.87432	3.23093	2.26126
CD74	XLOC_041307	5:149781199-149792492	1.99956	1.12939	2.28282	4.00455	3.31832	4.89795	1.6474	2.75943	1.57239	1.39686
COL7A1,MIR711	XLOC_035340	3:48601503-48632841	6.84765	5.9553	8.17766	8.03924	8.52406	8.22186	6.75912	6.82103	6.73865	6.26457
SERPINA1	XLOC_015896	14:94843083-94857030	1.41626	0.460019	4.41179	4.65293	4.84937	5.34745	2.67366	2.77709	1.82764	0.981283
DGAT2	XLOC_008240	11:75479777-75855266	0.519149	0.521473	2.95949	3.01115	3.12001	3.47756	1.08809	1.39474	1.11481	0.934396
SAMD11	XLOC_000026	1:860259-894767	0.174343	0.840121	2.84322	3.00993	3.17836	2.88993	1.15538	1.26383	0.765509	0.645831
CKB	XLOC_015999	14:103985995-103989448	4.18061	3.90923	5.77426	5.54609	6.63972	6.5344	4.77672	5.07575	4.59801	4.11149
TGM2	XLOC_031440	20:36756781-36795085	2.75619	1.82608	4.25291	3.74472	4.83195	4.51229	2.63284	2.37285	2.4393	1.60645
BAI1	XLOC_048036	8:143530790-143626370	1.52792	0.995188	2.95725	2.90516	3.62062	3.68758	1.28377	1.33789	0.867865	0.539988
DNAJB5	XLOC_049541	9:34989637-34998897	2.69739	2.58002	3.95216	3.77872	4.31389	3.84547	2.80175	2.3997	2.62996	1.92628
NLRP1,RNU7-31P	XLOC_021732	17:5402746-5522744	1.88245	1.28502	3.22713	2.41928	3.17745	3.1863	2.18448	1.72956	1.40043	1.08663
COL6A2	XLOC_032020	21:47518010-47552763	3.2321	3.53864	4.73354	4.60822	5.613	5.71323	3.06533	3.13136	2.76272	2.82724
HAPLN3	XLOC_018002	15:89420518-89438857	1.96513	1.71286	2.83578	2.74492	3.53907	3.82072	1.63557	1.82569	1.61472	1.59814
KCNJ12	XLOC_020672	17:21279508-21323179	0.402056	0.433558	1.52396	1.07213	2.10764	2.45592	0.76511	0.210888	0.588546	0.30878
EBI3	XLOC_024181	19:4229304-4237528	3.26054	2.09523	4.21367	4.38116	4.2709	4.82244	3.0002	3.26383	2.29957	1.05993
MAP3K14-AS1	XLOC_021090	17:43268297-43394414	1.96881	1.11116	2.37623	3.05127	3.07035	3.66654	2.00022	1.73572	1.75262	0.401314
APLP1	XLOC_024760	19:36316865-36370695	2.238	1.23055	3.75116	3.83523	4.21884	4.09669	2.03869	2.1913	2.38152	1.04483
COL18A1	XLOC_032013	21:46825046-46964325	2.3822	1.44176	2.59505	2.95394	3.6035	3.58087	2.11147	2.14263	1.60238	1.5359
C1QL1	XLOC_022441	17:43037060-43045550	1.38497	0.140661	1.42684	2.08691	2.43741	2.99827	0.987496	1.62336	0.735617	0.914802
NPR1,RP11-354A16.2	XLOC_001593	1:153650823-153666468	0.768925	0.33698	1.33401	1.9426	2.10352	2.84738	0.868861	0.821669	0.387605	0.715832
FAM19A3	XLOC_001280	1:113261507-113272160	1.20539	0.13234	2.22918	1.78206	2.63179	2.62587	0.97824	0.527301	0.984772	1.19424
MEIS3	XLOC_026303	19:47906315-47922780	1.88687	2.09466	2.97184	3.11513	2.95989	2.97612	1.20244	1.83773	1.39727	0.154752
SMARCD3	XLOC_046937	7:150929574-150974982	3.7128	3.43759	4.58274	4.42285	4.84457	4.99539	2.49617	3.28327	2.80943	2.94195
CPE	XLOC_037515	4:166282345-166419476	2.67752	2.48068	3.63717	3.72329	4.59664	4.61799	1.42429	2.56084	1.94682	1.78184
CSF1R	XLOC_041303	5:149432695-149493003	2.04638	2.3667	2.92047	3.02619	3.32059	3.43445	0.983627	1.93864	1.27512	1.58373
NDRG2	XLOC_015235	14:21484921-21572881	3.62089	3.31876	3.91349	4.34634	4.74791	5.16193	2.26366	2.82127	3.00743	2.82466
RAB15	XLOC_015632	14:65381078-65569413	2.33292	2.30339	2.51004	2.93953	3.19473	3.93229	1.34778	2.17448	1.19793	1.58699
TLE2	XLOC_025481	19:2997635-3047633	2.623	3.17299	3.08993	3.05599	4.07094	4.11351	1.95515	2.4958	2.49008	2.39744
DHRS2	XLOC_014338	14:24099323-24114848	3.24783	3.26567	4.36271	3.97816	4.9749	4.83896	2.51483	2.16034	2.21445	3.24107
GP1BB,SEPT5	XLOC_032483	22:19701986-19712295	1.57482	1.02759	2.77873	2.35267	3.36688	2.85268	0.51925	0.746141	0.597479	1.37799
DNM1	XLOC_050251	9:130928342-131017527	1.23392	1.07321	2.31822	2.35915	2.76312	2.46831	0.632315	0.669625	0.538628	1.13017
ARVCF	XLOC_033091	22:19863039-20004331	1.90306	2.16125	2.77078	2.93151	3.45278	3.75206	1.9536	1.05333	1.32646	1.4392
PSTPIP1	XLOC_016920	15:77285699-77329673	1.37387	1.00279	1.53877	2.40208	2.9314	3.29818	0.989757	0.257952	0.851711	0.631076
ST6GALNAC4	XLOC_051427	9:130670113-130679317	3.28923	3.02685	3.30534	3.62417	4.02285	4.62776	2.91591	2.70477	2.56958	2.93856
ANXA6	XLOC_041320	5:150480272-150537443	1.53655	1.13129	1.67894	1.6854	2.87478	2.82897	0.822673	0.369282	0.902668	1.22182
PLCD4	XLOC_028291	2:219472487-219528166	1.92998	1.27178	1.47086	1.73778	2.32107	2.70908	1.10544	0.273886	0.0774344	0.600555
SLC44A4	XLOC_043330	6:31830968-31846823	3.02486	3.05655	2.5033	3.36449	3.314	4.00802	1.64022	1.52635	1.65833	1.80335
EEF1A2	XLOC_031691	20:62119365-62130505	5.43067	5.03409	5.72847	5.55065	6.09251	5.78453	4.28426	3.67288	4.09296	3.95894
BAI2	XLOC_003067	1:32192644-32230494	2.69744	2.03457	3.41386	3.08987	3.76435	3.77656	1.70229	1.47715	1.81434	0.930934
COL1A1	XLOC_022559	17:48260649-48278993	2.94768	1.80846	2.37373	2.71393	3.49462	3.47254	1.68392	1.50542	1.14759	1.15762
ECM1	XLOC_001505	1:150480535-150486265	5.70072	5.45573	5.37119	5.12159	6.16793	6.06659	3.92686	3.96444	3.97051	4.47476
C10orf54	XLOC_006712	10:73156690-73575702	3.75975	3.89136	3.46362	3.61072	4.38382	4.48178	2.17414	2.27567	2.20935	2.75224
IL11	XLOC_026539	19:55875753-55889612	3.57096	3.41465	3.32275	3.57592	4.41743	4.75612	2.52058	1.95389	1.94198	2.28001
SEC14L6	XLOC_033271	22:30918787-30942741	1.83022	2.45003	2.33208	1.77298	2.68717	3.05915	0.996425	1.22081	0.464041	0.918959
SERPINE1	XLOC_045153	7:100770369-100782547	10.0377	10.09	10.2701	9.73462	10.7027	10.23	9.27339	9.10486	8.91176	8.92649
CAPN5	XLOC_008256	11:76777978-76837201	2.1398	1.68205	2.86878	2.5328	3.6938	3.35997	0.383276	0.468886	0.730653	0.512793
NACAD	XLOC_046044	7:45120022-45132068	1.60187	0.757441	1.63188	1.25613	2.60108	2.50613	0.142583	0.485262	0.318114	0.2027
LRP1	XLOC_010904	12:57482676-57607134	2.89001	2.30754	2.84279	2.42218	3.60792	3.07678	1.23959	1.07856	1.27831	1.34418
RP11-1094H24.4	XLOC_021184	17:48127712-48133267	2.60762	2.99709	3.30954	2.94561	3.79534	3.48796	1.5501	2.04689	1.8239	2.03
CST6	XLOC_008052	11:65779311-65780976	5.91034	6.06942	5.39179	6.11423	6.11139	6.66232	4.61669	5.01433	4.36514	4.26311
SULT2B1	XLOC_025030	19:49055331-49102682	3.94754	3.6897	3.81536	3.83343	4.63373	4.89307	3.31836	2.98266	2.50409	2.0351
FLNC	XLOC_045334	7:128470430-128550773	4.75193	4.19558	4.95027	4.19643	5.80768	5.43383	3.72791	2.81093	3.55675	2.90524
CTD-2527I21.4,FXYD1,FXYD7	XLOC_024728	19:35615416-35645204	1.23838	1.27432	1.94652	0.667511	2.57659	2.06039	0.991332	0.564154	0.477024	0.27739
PPIF	XLOC_005701	10:81107224-81115093	6.48548	7.32252	6.97308	7.13632	7.83223	8.24125	6.02688	5.26577	6.28426	6.57275
HPCAL1	XLOC_026685	2:10443014-10567743	3.88057	3.86203	4.36885	4.20237	5.06609	5.1996	3.50196	2.81343	3.40216	3.46403
RHOB	XLOC_026754	2:20646834-20649200	5.26834	6.13234	6.17678	5.69999	6.79665	6.46808	4.82719	3.98114	4.70285	4.95453
AJAP1	XLOC_000098	1:4714791-4843850	2.24318	2.88191	2.81701	2.74845	3.30058	3.65331	1.93711	0.870763	1.56116	1.6339
LRRC8E	XLOC_024256	19:7953389-7968427	1.52049	2.29753	2.11301	1.63752	2.40926	3.0881	1.32573	0.99358	1.23001	1.33564
HIST1H2BK	XLOC_043170	6:27106072-27114619	2.8339	3.60977	4.04788	4.16887	3.8954	3.9732	2.54344	2.47911	2.38185	2.33622
ZNF467	XLOC_046912	7:149461270-149470598	1.93578	2.36311	3.14101	2.56694	3.18141	2.73726	1.7252	0.966017	1.71032	1.37633
SEMA7A	XLOC_017821	15:74701629-74726808	3.81149	3.33117	3.41654	4.14271	4.04504	4.71147	3.02911	2.4729	3.03036	2.91007
MTHFR	XLOC_002771	1:11821843-11908402	1.54215	1.14938	1.12812	2.23065	1.87869	2.41914	0.443416	0.856468	0.90073	0.540652
AC009133.19,QPRT,RP11-368N21.4,SPN	XLOC_018544	16:29674299-29710020	3.57572	2.67974	3.21603	3.29182	3.84142	3.88962	2.16711	2.40654	2.62854	2.87664
MIR1287,PYROXD2	XLOC_006954	10:100143321-100175478	3.21739	1.71691	3.05657	2.85322	3.30867	2.96938	1.78764	2.26107	2.05986	1.64322
AP006621.8	XLOC_008768	11:818901-842545	2.60131	2.62781	2.34609	2.62186	3.19674	3.13788	0.68568	1.86367	1.70001	2.60015
KLK5	XLOC_026406	19:51446558-51515385	5.44651	5.73633	5.7659	6.5406	6.27546	7.07613	4.25035	5.29954	3.54164	4.76421
CTB-147C22.8	XLOC_025104	19:51446558-51515385	2.24482	2.61014	2.67186	3.64063	3.36004	4.281	0.0944793	1.41249	0.273206	1.62308
ARRB1	XLOC_009719	11:74971170-75062873	2.22167	2.31825	2.21877	2.83807	2.6718	3.70771	1.0581	1.94899	1.44033	1.83042
SECTM1	XLOC_022960	17:80278884-80291950	3.07145	3.44392	2.73162	3.97112	3.87648	4.99378	2.09665	2.45849	1.07806	2.63956
AL645941.1,HLA-DMA,HLA-DMB	XLOC_043363	6:32902405-32949282	1.8754	1.39434	1.02992	2.46132	2.86384	2.8765	0.329158	1.34273	0.540156	1.26757
TSPAN10	XLOC_021559	17:79523910-79615779	0.805383	1.6398	0.478682	1.82965	1.75314	2.11613	0.248268	0.931093	0.163202	0.482156
ACOT11,RP11-240D10.2	XLOC_000847	1:55007929-55104865	3.50046	3.11627	1.83395	2.86474	3.4598	4.07384	1.50249	1.54605	2.29056	2.48127
ASS1	XLOC_050309	9:133320093-133376661	6.98726	7.22372	7.82311	8.65716	8.12029	8.64861	7.26486	8.36685	6.67153	7.09983
LGALS7B	XLOC_024822	19:39279829-39282395	6.18927	6.16091	6.77112	7.65635	6.98722	7.58721	6.21552	7.37991	6.09233	6.23738
KLK7,KLK8,KLK9	XLOC_026408	19:51446558-51515385	4.6728	5.34475	5.59896	6.48558	5.90598	7.31739	5.06153	5.84754	4.09982	4.86529
IL1RN	XLOC_027556	2:113864790-113891593	2.95421	3.16636	3.75135	4.40511	4.02377	4.85689	2.94024	3.62258	2.27491	2.75186
KRT15	XLOC_022343	17:39669994-39678781	2.16216	4.10218	4.18337	6.13978	4.71645	6.49024	4.05569	5.19308	2.45685	3.42804
FOS	XLOC_014767	14:75745471-75748933	2.84799	4.19329	4.02084	4.64708	4.45633	5.02717	4.03231	4.27877	2.44519	3.42354
KRT6B	XLOC_012129	12:52840434-52845910	1.69426	2.91563	3.73892	4.36915	3.87492	5.06316	2.86407	3.32835	1.66233	2.88311
IGFBP6	XLOC_010800	12:53491219-53496129	6.35355	6.54989	6.27807	7.22183	6.61797	7.72443	5.65697	6.72912	5.32424	5.87466
KLK10	XLOC_026409	19:51515994-51523431	3.82955	4.32074	4.33698	4.9284	4.75566	5.3304	3.49784	4.47024	3.027	3.80759
KRT19	XLOC_022344	17:39679868-39684560	4.84116	5.49001	4.88988	6.21237	5.86929	6.70036	4.1794	5.64634	3.82762	5.10221
ABHD6	XLOC_034014	3:58223232-58281420	2.31244	2.2119	1.95833	2.83628	2.33679	3.2429	1.60717	1.94682	1.26334	1.84461
IER5L	XLOC_051455	9:131937834-131972827	2.47059	2.23649	2.35375	3.14837	3.31275	4.11361	2.2271	2.68639	2.24168	2.79067
DUOXA1	XLOC_017522	15:45384847-45493373	0.814887	1.20022	1.02699	2.37468	1.90678	2.72348	0.684666	1.18775	1.43823	0.932976
AGAP11,BMS1P3,C10orf116,FAM25A,RP11-96C23.11	XLOC_005756	10:88695296-88784489	5.64552	6.55476	6.51028	7.0009	7.49227	8.14922	4.80944	4.69072	4.42332	5.25963
PDGFB	XLOC_033393	22:39619363-39640756	4.50412	5.12982	5.3032	5.40217	5.66878	5.97314	4.54138	3.83636	4.32478	4.30826
SAPCD1-AS1,VWA7	XLOC_043322	6:31707724-31745108	2.75338	2.56219	3.16077	3.51413	3.8325	3.67883	2.16845	1.89236	1.87196	2.66987
CALML5	XLOC_006204	10:5540657-5541533	4.82544	6.09666	5.43855	6.35214	6.49702	7.23965	4.89752	4.78897	4.67909	5.96592
HMOX1	XLOC_032815	22:35776341-35790207	2.74612	3.96331	4.14849	4.88263	6.37567	7.89337	2.42447	2.89641	2.14404	3.1913
TIMP3	XLOC_032800	22:32908538-33454358	4.35869	4.70785	4.92162	4.87235	5.55701	5.79308	4.31198	4.72122	3.64441	4.02598
Z98256.1	XLOC_033308	22:32908538-33454358	4.20693	4.87824	5.23803	5.05891	5.6002	5.33986	4.33735	4.82584	3.77666	4.01958
BX470102.3	XLOC_001587	1:153506078-153508720	2.71807	2.78431	2.94904	3.6946	3.44139	3.33991	2.3446	2.57531	2.06425	2.38667
HSPA2	XLOC_014661	14:64854748-65009955	2.93511	2.63541	2.53439	3.05755	3.5408	3.54237	1.22624	2.39894	0.95599	2.43791
DUSP1	XLOC_041468	5:172185228-172204777	3.73189	5.51514	4.89346	4.85651	5.36517	5.5275	4.40227	3.96881	3.34699	3.93871
PLEKHA6	XLOC_004626	1:204187972-204463910	4.00842	3.76154	4.88425	4.60219	5.08562	5.3212	3.87403	3.86722	4.03783	3.7428
TMEM125	XLOC_000676	1:43735664-43739673	1.07512	1.74228	1.4006	1.95068	2.40554	3.0941	1.57621	3.11889	0.484685	1.11094
C15orf48,HMGN2P46,MIR147B,RP11-519G16.3	XLOC_016601	15:45722726-45878488	2.7075	3.93808	4.80174	6.2657	4.80163	6.2031	4.70706	5.27545	0.74041	2.89793
RP11-402P6.11,RP11-402P6.9	XLOC_058392	X:70882844-71091534	3.16259	3.48194	4.09529	4.72845	4.43174	5.84487	4.12716	3.91117	1.53496	3.04912
NCF2	XLOC_004482	1:183430008-183567381	3.4695	3.80869	4.43071	4.66426	4.9014	5.46104	3.8049	4.13277	2.53898	3.40911
WFDC2	XLOC_030845	20:44095909-44110172	2.71978	2.87388	3.70487	5.96627	3.79348	5.73934	2.75115	4.62123	1.49255	3.04054
RARRES3	XLOC_007971	11:63304280-63313934	2.10008	1.88963	3.06886	3.90441	3.46234	3.90151	1.20207	3.20154	1.18953	1.72537
CPA4	XLOC_045362	7:129932973-129964020	3.25994	2.89478	5.10591	6.07528	4.83028	4.83054	3.53954	4.5708	1.73311	3.00702
C19orf81	XLOC_025095	19:51124563-51222707	1.05817	0.533603	1.28506	2.65551	2.93366	3.21011	1.98445	2.5966	0.224361	2.38855
AF274855.1,GABRE,MIR224,MIR452	XLOC_058914	X:151121595-151143152	1.45985	1.10644	2.20615	4.8603	5.0907	2.60034	2.55645	2.85866	1.45136	1.87524
EFEMP2	XLOC_009523	11:65590492-65641063	0.41698	0.823692	2.05288	1.91809	2.76738	1.83949	1.47906	1.39757	0.68454	1.07272
RP11-521C20.4	XLOC_016500	15:40331473-40359616	0.879659	1.62906	2.80416	2.93225	2.59025	1.674	0.912612	1.90836	1.14834	1.74375
CTB-50E14.6	XLOC_024911	19:42901279-43156171	1.68234	4.49646	4.30416	4.94259	5.89587	5.44715	3.84348	0.880544	3.35724	2.1535
DUSP8	XLOC_008777	11:1575273-1620866	0.21661	2.00364	2.36748	2.22087	2.97278	2.99777	2.39601	1.00652	1.58288	0.682717
ARC	XLOC_049217	8:143692404-143697020	1.32746	2.83503	2.7237	2.10336	3.41934	3.83237	3.01699	1.2148	1.87128	0.827648
FGFR1	XLOC_048479	8:38268655-38326352	0.393229	1.53369	2.2186	2.04803	3.01412	2.63592	1.26424	0.798009	1.09647	1.73965
MIR3615,SLC9A3R1	XLOC_021429	17:72666716-72765492	5.37981	4.95266	4.95438	4.80366	6.54079	5.00125	4.68937	4.68787	4.77692	4.73932
MIR200A,MIR200B,MIR429	XLOC_000036	1:1098196-1105719	0.602229	0.561986	0.5709	0.638686	2.88146	0.719587	0.303225	0.712869	0.384072	0.35834
FAM89A,MIR1182	XLOC_004899	1:231154511-231175992	2.46655	2.35601	2.62083	2.54455	2.24988	5.40191	2.95248	2.938	2.7982	2.36728
DGCR6	XLOC_032468	22:18893540-18924066	0.956213	0.331178	0.877257	0.696546	1.47067	2.86096	0.896326	0.706535	0.85243	0.080453
CLHC1	XLOC_028949	2:55401926-55462989	1.29671	1.75138	3.25132	1.45626	2.43414	3.86527	1.61748	1.41059	3.01016	0.758525
RP11-110I1.5	XLOC_010096	11:118868851-118901616	3.09756	1.87375	3.03766	1.88124	2.88677	4.04027	1.96813	1.3674	2.49459	3.16514
OAS2	XLOC_011355	12:113344581-113455556	5.38456	4.41062	6.03761	6.88376	6.18168	6.85132	6.16304	7.08173	5.53781	5.04733
CMPK2	XLOC_028574	2:6980700-7038370	3.27479	2.30279	3.61186	4.67349	3.88851	4.67209	3.91558	5.17682	3.39114	3.13136
MX1	XLOC_031941	21:42792230-42831141	6.70941	5.73674	6.91889	7.74301	7.19504	7.86772	7.15551	8.19752	6.85579	6.33772
OAS3	XLOC_011354	12:113344581-113455556	5.95204	5.20115	6.34013	6.90923	6.3291	6.98372	6.30861	6.99084	6.09008	5.91898
IFI6	XLOC_003010	1:27992571-27998729	8.26996	8.18176	9.43535	10.303	9.6285	10.1684	9.1885	10.2737	8.73461	8.69326
HERC6	XLOC_037072	4:89299890-89364263	4.36549	3.5585	4.44836	4.98173	4.65492	5.50121	4.35493	5.03607	4.03589	4.17392
ISG15	XLOC_000032	1:948802-949920	8.88623	8.7235	9.79628	10.445	10.1507	10.7925	9.34716	10.3475	8.99078	8.79821
STAT1	XLOC_029997	2:191745522-191885686	6.95831	6.33799	7.26568	8.01105	7.5115	8.03979	7.10855	7.97254	6.89375	6.51064
IFIT1	XLOC_005788	10:90973325-91180758	7.3397	6.2056	6.87298	7.79315	7.37341	8.09633	6.97813	8.44473	6.82486	6.88967
OAS1	XLOC_011353	12:113344581-113455556	5.62234	5.14356	5.63024	6.38062	5.62776	6.61759	5.57877	6.81183	5.30231	5.30312
IFIT3	XLOC_005785	10:90973325-91180758	6.50453	5.55163	6.37514	7.17672	6.68208	7.40384	6.87445	7.90652	6.77215	6.38179
IFI44L	XLOC_001008	1:79085606-79114701	4.11229	2.43475	3.94474	4.59007	4.04816	4.49446	4.23597	5.31244	3.90072	3.95495
RSAD2	XLOC_026656	2:6980700-7038370	4.04547	3.72457	5.49379	6.30088	5.63297	6.63238	5.17472	6.95834	4.06865	4.6147
HERC5	XLOC_037073	4:89378267-89427314	3.97799	3.15423	4.39056	4.76525	4.73837	5.0693	4.43103	5.33076	3.97508	3.85089
LINC00514	XLOC_018256	16:3038961-3052408	3.92869	3.53458	4.29814	4.64053	4.67619	4.92608	3.42352	4.65951	3.67077	2.63919
IFIT2	XLOC_005784	10:90973325-91180758	5.26265	4.66763	4.97702	5.94459	5.06909	6.05517	5.53237	6.88027	5.06899	5.25677
FGFBP1	XLOC_037822	4:15937191-15940363	6.80345	6.45772	8.43966	9.13646	8.44307	8.93787	7.72316	8.62154	8.10635	7.71492
LTB	XLOC_043309	6:31548301-31550299	5.49248	4.14035	7.90955	8.12612	7.53924	7.90295	6.93628	6.96766	6.68822	6.2306
AC004791.2	XLOC_025771	19:15962786-15975734	2.05267	0.910318	3.19968	2.94337	3.36393	3.31336	2.63599	3.12659	2.30777	1.92241
PLAC8	XLOC_038217	4:84011200-84058228	1.8497	0.189426	3.27084	2.41861	2.65467	2.35337	2.05408	2.31602	1.72589	0.0759844
GBP1	XLOC_003585	1:89518001-89531043	3.89966	3.31144	4.03729	5.28357	4.10768	4.96899	3.85988	5.0947	3.45105	3.78603
RTP4	XLOC_034876	3:187086119-187089864	0.419302	0.281977	1.49939	2.73718	1.82022	2.83896	0.837588	2.4275	0.0687946	0.850503
TNFSF10	XLOC_036168	3:172223297-172241297	2.77542	1.67058	3.69381	4.88034	3.81762	4.34597	3.19814	4.97229	2.95504	3.01701
ETV7	XLOC_043418	6:36321775-36458920	2.31322	1.20285	2.3748	3.39381	2.8974	3.72809	2.31227	3.38408	2.06847	1.32336
CXCL10	XLOC_038160	4:76932336-77033955	1.75803	1.3571	3.0008	5.07661	3.54168	5.69012	3.52224	5.37351	3.06752	3.5434
CXCL11	XLOC_038161	4:76932336-77033955	2.4092	1.56755	2.7196	4.41432	2.94881	4.88166	3.10171	4.1501	2.63626	3.24261
OR56B1,TRIM22	XLOC_007367	11:5684424-5959849	3.84206	2.99042	4.52712	5.52087	4.82285	5.64515	4.83816	6.06183	4.6905	4.09986
AC005702.1,AC005702.2,AC005702.3,AC005702.4,HEATR6,MIR4737	XLOC_022657	17:58118567-58156292	3.49935	3.65813	3.64368	5.87582	3.54018	3.54905	4.00718	8.03551	3.96062	3.71476
RP11-761I4.1,STARD5	XLOC_017912	15:81451915-81616524	3.3338	3.00252	3.79784	4.76242	3.49992	4.15598	4.32013	5.23636	3.8	3.10012
IGFL1	XLOC_024987	19:46732220-46734500	2.4242	4.05153	4.42338	7.73788	2.95596	5.8227	5.3479	7.38402	3.28857	5.19207
S100A9	XLOC_001585	1:153330329-153333503	6.72836	7.61386	10.2625	11.2866	10.3994	11.1374	9.39167	10.8452	7.31797	8.71383
RNA5SP334,SAA1	XLOC_007511	11:18287720-18291524	2.79911	3.45545	5.46137	7.45328	5.2567	7.43363	5.2163	6.81242	3.1285	4.63357
S100A8	XLOC_004086	1:153362507-153363664	1.95276	4.48101	6.78431	9.30769	6.09032	8.28828	6.99843	8.73597	3.62484	5.95818
C1R,C1RL	XLOC_011663	12:7187512-7275097	4.12611	3.66976	4.88296	6.36162	5.09688	6.03966	4.7466	6.36303	4.08078	4.4359
PDZK1IP1	XLOC_003280	1:47649264-47656716	2.31764	2.50243	5.40561	6.27492	5.23813	5.83958	4.66387	5.78143	2.72973	2.41169
LCN2	XLOC_050249	9:130911349-130915734	0.895202	1.28094	5.36187	6.29193	5.60078	6.40534	4.11699	5.32794	2.08503	0.808088
SOD2	XLOC_044237	6:160100095-160210781	6.05917	6.8645	8.5607	9.14865	8.51962	9.24039	8.19088	8.83998	7.12922	7.12441
SLC2A3	XLOC_011679	12:7917811-8250367	0.399926	0.786002	2.26327	3.47933	2.17969	2.63628	2.41449	3.40928	1.71398	0.468333
KRT7	XLOC_010782	12:52626303-52715182	3.25937	3.24949	4.82264	5.56318	5.04744	5.84325	4.07736	4.06788	3.92305	3.58706
KRT31,KRT34	XLOC_022334	17:39533901-39553844	1.63588	1.93861	3.19008	4.05865	3.50829	4.90692	2.97604	2.86185	2.37266	2.47133
CLDN1	XLOC_036308	3:190023489-190040264	1.38348	3.42132	4.79519	5.79074	4.53193	6.25035	5.05382	4.82307	3.87713	3.66892
NNMT	XLOC_008511	11:113930314-114227293	4.14321	3.58997	5.60511	6.37505	5.32815	5.97324	5.40495	6.58111	5.29869	4.33653
HEG1	XLOC_035784	3:124684553-124774971	3.24614	3.35342	3.51023	3.85544	3.44833	3.78031	3.55153	4.34802	3.48481	3.29834
CCL5	XLOC_022206	17:34195970-34212867	5.30544	5.20218	5.81206	7.3962	5.67403	7.20036	6.1933	7.14343	4.95242	5.3356
RP11-79H23.3	XLOC_047639	8:79578281-79846109	0.0458483	0.81013	1.05773	2.59732	1.89469	2.84533	2.15576	2.93034	0.486725	0.366532
ROM1	XLOC_007956	11:62369649-62382592	1.49663	0.240644	2.18771	3.09402	2.74446	1.64309	1.1007	2.29031	0.954487	0.788594
ABCG1	XLOC_031951	21:43619798-43720903	0.783809	0.635522	4.41628	3.64516	4.75723	4.0365	3.62234	2.49539	3.51924	0.675852
ABCA1	XLOC_051214	9:107543282-107691173	1.31099	1.30279	2.93502	2.78178	3.13392	2.59359	2.7042	1.8204	3.02851	1.53546
CSF3	XLOC_020950	17:38171613-38174067	2.50167	2.12281	4.27186	3.26431	4.11301	3.47624	4.53327	2.79835	3.77448	2.5422
ULBP1	XLOC_042804	6:150285083-150294844	0.388686	0.703871	1.47305	1.65788	2.28227	2.40582	2.34351	1.20321	2.09832	0.729583
VNN1	XLOC_044022	6:133002638-133035188	0.942368	0.754939	2.00896	1.67351	1.74556	2.1328	1.96541	1.30664	1.13712	1.07715
CCL20	XLOC_028361	2:228678557-228682272	2.28239	2.79096	5.91578	5.25485	5.268	4.82984	5.71527	4.53093	4.5977	3.49527
IL6	XLOC_044486	7:22765013-22771621	2.83555	3.32402	5.13857	5.46539	4.74502	4.9531	5.5941	4.73724	4.43367	3.81649
NIPAL4	XLOC_039980	5:156687131-157002783	1.07766	1.17173	3.358	3.09075	2.70559	2.67806	3.45649	2.97653	2.74403	1.88081
SORCS2	XLOC_036499	4:7194264-7744554	0.616207	0.880764	2.94243	2.03351	2.51525	2.93146	1.71893	2.28319	2.22813	0.219661
RP4-792G4.2	XLOC_003420	1:63786554-63790797	0.236168	0.523642	2.23864	1.96363	1.91578	1.71617	0.732677	1.6297	0.852023	0.100386
RP11-66B24.4	XLOC_017185	15:101389765-101626271	1.65568	0.615445	3.78974	3.73737	1.65226	1.56691	2.71847	2.13782	3.24074	1.36861
SLC25A27	XLOC_042209	6:46620672-46703430	1.4577	0.307382	2.45619	2.06191	1.80874	1.06133	2.39082	2.25524	1.17956	1.76214
RP11-66B24.4	XLOC_017182	15:101389765-101626271	1.47835	1.01432	2.93255	3.77648	1.3132	1.68038	3.44418	2.93599	3.06774	1.91458
RN7SL1	XLOC_014500	14:50043389-50081390	6.8576	7.49757	8.19709	8.07434	8.50405	9.38477	9.68609	7.94324	8.91118	8.23334
RN7SL2	XLOC_015487	14:50329270-50329567	6.61659	7.03745	7.97338	7.74052	8.23713	9.08052	9.62241	7.67895	8.65894	7.82664
Metazoa_SRP	XLOC_015485	14:50320335-50320632	2.77013	3.17565	4.15668	3.66398	4.94955	4.82391	5.83468	3.41969	5.36028	3.70979
PTGS2	XLOC_004509	1:186640922-186649559	2.96283	4.37377	6.12891	5.02905	6.09155	5.66587	6.19545	3.67327	6.2066	4.04475
RP11-329L6.1,SNORA76	XLOC_021335	17:62223329-62223836	1.26778	1.28105	6.25187	7.44931	6.572	7.60816	7.18094	6.64318	6.41308	4.66575
EDN1	XLOC_041681	6:12261522-12297427	2.22559	2.31915	3.45349	3.78149	3.56159	4.35528	4.18249	3.00583	3.86357	2.64578
AC022596.6	XLOC_021891	17:16721288-16725977	8.83717	7.95492	10.8752	10.4506	11.1536	10.6317	10.0239	10.3335	9.63772	8.19848
KRT16P5	XLOC_021971	17:20352707-20603227	4.51607	3.26145	6.85799	6.36031	7.1439	6.46435	6.13534	6.27762	5.73025	4.0294
LGALS9B	XLOC_021966	17:20352707-20603227	1.43846	0.919912	3.46682	2.7034	3.48416	2.86592	3.173	3.22635	2.82153	0.845863
LGALS9C	XLOC_020590	17:18380050-18398259	1.28522	0.587288	2.93292	2.44337	3.10508	2.79182	2.58193	3.05188	2.88454	0.416094
SUSD3	XLOC_049951	9:95820981-95847420	1.78937	0.728791	3.08951	3.22651	3.69547	3.57598	3.04821	3.31889	2.78012	0.443766
AC004383.4,MIR424,MIR503	XLOC_058779	X:133677184-133680930	3.40626	2.07337	4.55348	4.17517	4.94698	4.24812	4.26603	3.9163	5.29178	2.80982
SLC24A1	XLOC_016787	15:65903703-66184329	0.0715842	0.116485	2.29258	1.82014	2.49946	2.32559	1.88363	1.06701	1.1726	0.783079
HEPHL1	XLOC_008378	11:93754526-93846917	2.11222	3.81851	3.92572	5.06363	3.92721	4.29764	3.1389	4.37668	2.17863	3.23134
FBXO32	XLOC_049100	8:124510128-124560611	1.63258	4.04965	3.48276	4.48511	3.01755	3.72069	3.0923	4.91851	1.85199	3.52512
MIR210HG	XLOC_008757	11:565659-568457	1.15071	2.23271	1.53723	3.13331	1.59144	2.42309	0.559462	3.3377	0.550851	2.28524
MATN2	XLOC_047771	8:98881067-99058697	2.63069	2.3271	2.64799	3.65713	2.18131	2.80659	2.49599	4.1222	1.7344	2.05179
DPP4	XLOC_029794	2:162848558-162931679	1.42746	1.50301	1.95573	3.39891	1.53476	2.46447	1.88094	2.85547	0.0283428	2.07954
MIR135B	XLOC_004642	1:205342379-205438152	1.04812	0.979499	0.817893	2.61815	0.741816	1.03405	0.740444	0.992522	0.0297002	0.904781
TAGLN	XLOC_008538	11:117070036-117103268	3.68519	4.04818	3.86073	5.34421	3.9901	5.80881	4.37716	4.56554	3.87995	3.88233
RP11-356I2.2	XLOC_044078	6:138143882-138150615	0.744669	1.1576	1.28796	2.81069	1.52558	1.90322	0.957305	1.74469	0.754665	0.742256
-	XLOC_038111	4:70296655-70296754	7.65919	10.4345	9.66518	8.24365	7.99741	10.4641	10.2339	8.6481	8.74978	8.36209
-	XLOC_024745	19:36066505-36066635	5.26766	9.609	8.27964	7.41106	7.1393	9.12546	8.6086	7.99038	7.91392	7.83053
-	XLOC_012833	12:127650865-127650988	5.8529	9.39374	8.22555	7.04217	7.45906	8.99296	7.99228	6.93664	7.42755	8.07405
-	XLOC_056980	X:44654076-44654166	11.4047	13.6239	11.6918	11.3965	11.4964	13.8981	13.0913	11.5867	13.1352	10.9588
ADAMTS1	XLOC_032141	21:28208605-28217728	5.01486	6.65076	6.97519	5.80046	7.05716	6.0525	6.18386	5.03989	6.08017	5.95451
GAL	XLOC_008114	11:68451246-68458643	1.4388	2.62233	2.41634	2.70646	4.17089	4.55351	2.73299	1.83961	2.53657	2.75918
RP11-521L9.1	XLOC_020046	16:68877442-69119353	1.80213	0.935452	1.72336	0.359128	2.02825	2.5004	2.87314	1.10802	1.16254	2.11476
FAM73A,RNA5SP21	XLOC_001000	1:78245308-78345369	2.83605	2.96465	6.95134	2.29253	2.65454	2.3697	2.59639	2.60768	2.38019	2.71123
RP11-701H24.4,SNHG14,SNORD115-13,SNORD115-26,SNORD115-46,SNORD115-7,SNORD116-22,SNORD116-28,SNORD116-4	XLOC_016291	15:25068793-25684231	2.83453	2.05937	6.1968	2.37261	2.5741	2.07205	2.59107	2.46858	2.61584	2.61824
HSPA1A	XLOC_041990	6:31777395-31785723	6.5724	7.37405	6.11487	6.1324	6.2465	6.12877	5.43467	6.04298	4.62738	6.57331
HSPA1B	XLOC_041991	6:31795511-31798031	5.92686	6.50206	5.64703	5.50194	5.58261	5.37438	4.94974	5.49765	4.25418	5.76121
HSPA8,SNORD14C,SNORD14D	XLOC_010135	11:122928196-122933938	10.0607	10.207	9.31566	9.99416	9.83289	10.2688	8.76845	10.0296	8.45127	10.4439
SLAMF7	XLOC_001732	1:160709036-160724611	2.75986	2.79234	1.58686	1.8414	2.40186	2.84529	0.994486	0.96899	0.686738	1.90047
ANXA9	XLOC_001516	1:150953906-150980851	2.53021	2.43413	1.28444	2.30553	1.88916	2.51813	0.638593	1.51763	0.574596	1.82212
CENPT	XLOC_020016	16:67840667-67906470	6.5023	6.45627	4.72789	4.97269	5.10284	5.42	4.62869	4.75696	4.79304	5.47764
C1orf116	XLOC_004666	1:207191865-207206101	4.80282	5.4543	3.36945	3.77886	3.60123	4.19371	3.73364	3.88586	3.79414	4.55994
NEFL	XLOC_048364	8:24808467-24814624	3.39917	3.57534	0.811833	1.7992	1.71196	2.41719	0.687768	1.78507	0.572502	3.16389
RP11-295G20.2	XLOC_004908	1:231656635-231702270	5.07953	4.98183	3.34251	3.53605	3.32526	3.56415	3.65535	3.72443	3.60254	4.29649
RP5-857K21.10,RP5-857K21.11,RP5-857K21.14,RP5-857K21.7	XLOC_000016	1:536815-659930	5.3245	6.56675	4.77739	5.09179	4.71107	5.7222	4.48733	5.22699	4.9175	5.52561
J01415.1,J01415.13,J01415.14,J01415.15,J01415.16,J01415.2,J01415.21,J01415.23,J01415.3,J01415.4,J01415.6,J01415.7,MIR4485,MT-ATP6,MT-ATP8,MT-CO1,MT-CO2,MT-CO3,MT-CYB,MT-ND1,MT-ND2,MT-ND3,MT-ND4,MT-ND4L,MT-ND5	XLOC_056687	MT:0-16569	2.85415	3.11694	1.49892	1.85197	1.62409	2.35738	1.47015	2.67996	1.33287	2.80179
IL18R1,IL1RL1	XLOC_027434	2:102927961-103015218	2.94152	4.30112	2.84475	2.96646	2.99401	3.5051	3.04882	2.35108	2.45499	2.92648
GPRC5A,MIR614	XLOC_010453	12:13037747-13070871	6.06884	7.39841	5.51108	5.70556	5.35199	6.13496	6.09899	5.96153	5.89166	6.02125
DUSP4	XLOC_048405	8:29190580-29208185	5.60855	6.1246	4.13449	3.54071	4.22366	3.84497	4.57421	3.56378	5.01507	5.34958
RP5-977B1.11	XLOC_031420	20:34894257-35274619	4.23993	3.33765	1.47325	2.48052	2.34761	2.87737	1.17562	2.04253	1.47886	2.59076
MYL9	XLOC_030754	20:34894257-35274619	3.04295	2.87225	0.754665	1.55609	0.900969	1.7323	0.378623	0.879996	1.02384	1.41444
C10orf82	XLOC_007076	10:118423206-118502085	2.62725	1.93465	0.405524	0.450327	0.701833	0.559492	0.575487	0.708973	0.883926	0.584212
GSDMA	XLOC_020948	17:38119191-38135405	5.10181	4.35593	1.58603	2.60039	2.259	2.66005	2.38736	2.31098	2.44198	1.66647
RAET1L	XLOC_044161	6:150319154-150390348	2.55304	2.97873	0.152443	0.943989	1.96101	2.30983	1.43342	1.36179	0.872388	1.08105
TP53INP2	XLOC_030724	20:33284721-33413452	4.2288	4.36114	3.48131	3.27707	3.86717	3.45855	2.51304	2.11205	1.98449	2.71498
ORAI2	XLOC_045169	7:102067264-102105323	3.17709	2.73155	1.57196	1.58703	2.54243	1.99196	0.332908	0.411025	0.470313	1.24708
RP11-860B13.3	XLOC_011882	12:27932753-27955973	3.96898	2.88594	1.44889	3.08136	2.75706	2.23762	2.96888	1.74258	1.91766	1.92191
RP4-536B24.2	XLOC_019160	16:87863628-87903094	2.95664	3.37107	2.53228	2.14399	1.52098	1.30016	2.85438	3.3764	2.51524	3.45566
RP11-297K8.2	XLOC_004277	1:161070345-161129139	2.74375	2.57548	1.33913	1.83952	1.06599	1.22021	1.75259	2.75281	1.03084	2.44298
GPR111,GPR115	XLOC_042217	6:47624171-47689757	2.72407	3.10847	0.863344	1.86596	0.688852	1.54084	1.472	2.52867	0.634807	2.35122
U6	XLOC_026094	19:39286942-39288035	0.744979	5.68651	1.15836	0.576145	0.760962	0.372116	0.293535	4.16414	0.0293186	3.51111
-	XLOC_030647	20:29653149-29653265	6.25891	7.00968	6.07929	5.71878	5.70843	7.89879	5.10811	5.80928	4.68643	5.54283
CTD-3199J23.6,NBR2	XLOC_021032	17:41196311-41322420	2.66562	2.76198	2.05419	2.09003	2.15382	2.52116	1.50947	2.34178	1.43782	1.77241
FKBP1C	XLOC_042285	6:63921350-63922929	2.34004	2.0306	2.50717	1.21976	1.34755	2.58315	1.40979	2.77901	0.97706	1.40685
ITPR2,RP11-283G6.4,RP11-612B6.2	XLOC_011867	12:26272958-26986131	2.04236	2.31736	1.88041	1.90709	1.96208	3.29793	2.75292	1.77183	1.64351	1.94067
NRF1,RNA5SP244	XLOC_045352	7:129251551-129397020	2.99887	3.13501	2.56636	2.85369	2.60633	3.01595	3.30749	2.99037	3.41343	4.69834
MIR3176	XLOC_018162	16:577716-604636	1.68138	1.12892	1.20977	0.761898	1.45447	1.32559	1.25607	1.35182	1.32807	4.31045
ASPM	XLOC_004543	1:197053257-197115824	2.94752	2.52789	1.48602	1.54894	1.61066	1.67412	2.03093	2.34136	2.45176	3.58363
GINS4	XLOC_047384	8:41386724-41482520	2.59799	1.92541	1.38978	1.86519	1.86881	1.88151	1.72044	1.63378	2.54762	3.52189
CDKL1	XLOC_015497	14:50704280-50883179	1.58049	2.46908	1.43535	1.85092	1.26728	2.49487	2.4414	1.08519	3.29247	3.13457
AC068831.8	XLOC_017102	15:91509269-91538859	1.19357	1.24857	0.704721	1.23727	1.18161	1.44427	2.63573	1.87948	2.97889	2.72062
CTC-548K16.5	XLOC_025732	19:14491312-14519538	2.39123	2.37521	2.57319	2.96153	2.40027	3.02768	0.178581	0.630778	2.27704	3.47952
RPPH1	XLOC_015208	14:20811206-20826064	1.01203	1.84909	2.33957	2.62055	2.2813	1.33863	1.50576	1.20862	1.47157	3.65448
STC2	XLOC_041478	5:172741715-172756506	3.93611	4.75381	5.87912	5.05543	5.24164	4.56298	6.95193	5.96854	7.39272	3.92545
CHAC1	XLOC_016528	15:41245159-41248710	2.91124	3.50864	4.63696	3.8478	3.95516	4.02568	5.42684	4.42332	5.69354	3.07088
TRIB3	XLOC_030444	20:361260-378203	4.99502	5.71238	6.71776	5.8119	6.14725	5.86782	7.20199	6.23281	7.38376	5.41574
UPP1	XLOC_044695	7:48128148-48148330	7.4203	8.51	8.85236	8.22087	8.38108	8.55385	9.70292	8.61762	9.43467	7.88108
DDIT3	XLOC_012251	12:57846105-57914300	4.59169	5.33545	5.61232	5.18437	5.42931	5.42307	6.19287	5.53992	5.91918	4.84072
SESN2	XLOC_000466	1:28585996-28609003	3.67169	4.17796	4.53435	3.67201	4.27275	3.874	5.10766	4.05451	5.19196	3.61779
TSC22D1	XLOC_013714	13:45007654-45151283	4.83193	5.59521	5.69132	5.80291	5.25737	5.28087	6.2984	5.81982	6.12172	5.09359
IL1A	XLOC_029482	2:113531491-113542167	6.31578	6.54884	7.28656	6.69854	6.83056	6.32445	8.10764	6.73743	8.22738	6.70397
GADD45A	XLOC_000943	1:68150743-68154021	6.10596	6.4914	7.57363	6.51323	6.91839	6.7433	8.32904	6.81619	8.23792	6.37245
RP4-564F22.2,SNORA71	XLOC_031444	20:37049234-37064106	3.59333	3.89514	4.21638	3.55865	3.77852	4.22661	5.19849	4.00193	5.43592	4.45617
EPB41L4A-AS1	XLOC_039590	5:111478137-111755013	3.57035	3.97945	4.23229	3.87808	4.01941	4.03316	5.05544	4.17222	5.14108	4.31894
PRR3	XLOC_041936	6:30509153-30531500	2.65528	2.06426	2.56692	2.66292	2.66455	2.55727	3.919	2.77012	3.95245	2.82917
RPSAP52	XLOC_012328	12:66151799-66360075	1.66003	1.5496	2.28604	1.53413	2.32598	1.6381	2.84903	1.43905	3.0811	1.52896
TXNIP	XLOC_001400	1:145438468-145442635	5.06771	5.17741	7.02725	6.72051	6.88296	6.5046	8.02041	6.89209	8.35074	5.66042
PAX6	XLOC_009110	11:31531296-32127301	0.444932	0.0176227	1.51205	0.658828	1.74708	1.02325	2.34055	1.88226	2.3999	0.32534
BIRC3	XLOC_008427	11:102188214-102210134	2.25405	1.82223	3.74041	3.0891	3.52021	3.15417	4.30636	2.87189	4.22089	2.18224
ASNS	XLOC_046442	7:97481429-97501854	5.30436	5.74561	6.59482	5.98316	5.86227	5.21607	7.13214	6.97105	7.06316	5.74576
TSC22D3	XLOC_058599	X:106956450-107038973	4.19642	4.5555	5.73342	5.33191	4.89169	4.49902	6.18362	6.16663	6.30215	4.75921
GPT2	XLOC_018727	16:46918259-46965209	3.0516	2.8668	3.8822	3.38743	3.41426	2.68695	4.3748	4.14411	4.76404	2.9724
AC003005.4,ZNF419,ZNF773	XLOC_025352	19:57999078-58029772	2.76684	3.18257	3.40122	3.09147	3.09094	2.70484	4.03919	3.60873	4.00029	2.5474
MIR205,MIR205HG	XLOC_002223	1:209602164-209606183	7.97334	7.55971	8.43633	8.39153	8.04644	7.61039	8.99165	8.69576	8.95125	8.52343
PSAT1	XLOC_049846	9:80912019-80945010	3.97173	4.42196	5.11904	4.77072	4.27028	3.89981	5.53715	5.76923	5.50524	4.51219
MYLIP	XLOC_041709	6:16129325-16148479	2.37859	2.29536	3.11062	2.85432	2.53905	2.27992	3.3069	3.63957	3.26561	2.68594
CXCL2	XLOC_038141	4:74962792-74965010	1.97698	2.44757	4.08544	2.92147	2.9437	1.84477	4.52487	3.29732	3.58305	2.73622
SNORA24	XLOC_037231	4:119199846-119200977	6.44274	6.83816	6.79174	6.81944	6.7129	6.52865	7.33186	7.12176	7.31483	6.74882
CBS	XLOC_032336	21:44473300-44497053	4.03589	4.78519	4.50861	4.58447	4.25385	4.05738	4.91871	4.98542	5.08562	4.2938
AC004917.1,CCDC71L	XLOC_046571	7:106012696-106410653	3.65757	4.05746	3.88908	3.98673	3.79055	3.37543	4.17286	3.76557	4.34743	3.71534
ADM2	XLOC_033007	22:50919984-50924869	0.599537	1.51243	1.23518	0.836344	0.92685	0.46588	1.54371	1.05033	2.33573	0.369383
NAMPT	XLOC_046568	7:105888730-105926772	7.25246	7.18986	7.53214	7.28917	7.12991	7.16451	7.49858	7.48749	7.6619	7.18699
TRIM17	XLOC_004849	1:228594865-228604562	0.709335	0.51343	1.28206	1.04841	0.832825	0.914251	1.01956	1.49082	1.41329	0.4801
AD000090.2	XLOC_026027	19:36024313-36038428	0.669417	0.543892	1.32756	1.31333	1.07185	0.984276	1.47541	1.00685	1.42568	1.07752
AC129492.6	XLOC_020447	17:7975953-7991021	0.375379	0.590923	0.71476	0.870747	0.948324	0.388983	1.18504	0.910771	1.74155	0.665966
LINC00662	XLOC_025933	19:28175487-28475892	2.19121	2.84539	3.44217	2.97127	2.88543	2.68692	3.12903	2.70459	3.36841	2.89138
CTD-3184A7.4	XLOC_031046	20:62258579-62260177	1.06135	1.55687	2.11635	1.96593	1.50199	0.71168	2.15754	1.49745	2.0658	1.69846
RP13-582O9.5	XLOC_049235	8:144362330-144365677	2.11342	3.29629	3.74465	2.5995	3.01664	2.76916	3.51484	3.46639	3.74054	2.66883
LINC00669	XLOC_023816	18:36786887-37380282	1.21701	0.0432045	1.66729	0.737929	1.62862	0.860121	2.27041	1.42393	2.21278	1.38671
-	XLOC_007893	11:59467017-59467710	1.15572	0.24777	0.891909	0.0977052	1.01657	0.392658	1.96878	1.46614	1.66641	1.47618
CTSS	XLOC_004025	1:150702550-150738433	2.09884	0.918829	1.58176	1.77498	1.65759	1.80721	1.85993	2.51054	2.12277	1.6903
MSC	XLOC_048726	8:72740401-73030628	2.23836	2.86942	3.42097	3.43221	3.08695	3.31602	3.03214	3.53365	3.09269	3.03769
ZC4H2	XLOC_058333	X:64136249-64254593	0.711662	0.80497	1.52733	1.37319	1.52397	0.892057	0.428164	1.4378	1.77662	1.35667
AC079305.10	XLOC_027972	2:178092322-178408564	0.972229	1.43334	1.70188	1.14821	0.879306	0.75774	1.30637	1.25844	1.38901	1.12303
RP1-186E20.1,SFTA1P	XLOC_006246	10:10817753-10836996	3.70105	3.71988	3.30988	2.4034	3.10062	2.80225	3.72801	3.13432	4.17132	3.28185
ARG2	XLOC_014683	14:68086514-68162531	3.39096	3.50976	2.78096	2.16991	2.29883	1.49947	2.96768	2.24068	3.43495	2.88948
RP11-382A18.1	XLOC_049135	8:128301940-128494384	2.81917	3.38131	2.9588	2.08873	2.55782	2.09288	3.1537	3.31389	2.9283	3.21577
MAP1B	XLOC_039326	5:71403059-71505395	0.687706	1.6455	1.0601	0.294912	0.836328	0.24007	1.45397	0.77532	1.28102	0.913983
FAM107B	XLOC_006280	10:14560555-14816896	3.56759	3.72073	3.65822	3.13487	3.24494	3.04123	4.45789	3.78662	4.90669	3.56322
LINC00511	XLOC_022776	17:70319263-70636611	2.48294	2.68351	2.68114	2.17763	1.58495	1.82004	3.18783	2.40319	3.23036	2.31702
-	XLOC_000703	1:45203737-45204987	1.08338	1.67767	1.4402	1.22425	1.38946	1.39142	2.25262	0.968327	1.9362	1.4036
CREB5	XLOC_044545	7:28338939-28865511	2.18345	1.62382	1.88746	1.53693	1.42243	1.16978	1.69014	1.02305	2.3165	1.35422
IFFO1	XLOC_011646	12:6647540-6665239	1.54143	1.54764	0.759642	0.142675	0.493391	0.540464	1.07766	0.299526	2.08006	0.637842
TOX2	XLOC_030819	20:42543491-42698256	3.4221	2.94471	3.51981	1.58126	2.31545	1.73659	2.7038	1.48324	3.67909	2.99282
CECR7	XLOC_032444	22:17517459-17551554	1.73502	1.7344	1.18447	1.79972	1.59431	1.63825	2.79223	1.30335	2.47775	1.98804
RP11-290L1.3	XLOC_011063	12:76419226-76427712	6.01018	6.39428	5.75059	4.64043	5.32935	4.73404	7.27323	4.9196	7.93763	6.09347
PHLDA1	XLOC_012411	12:76419226-76427712	3.96552	4.26989	3.76345	2.6446	3.23222	2.55285	5.19694	3.01461	5.86695	3.98805
AREG	XLOC_036971	4:75310850-75320726	4.68749	5.06197	4.44897	3.48465	3.70766	3.39664	5.43783	3.56334	5.9183	4.02792
DLC1	XLOC_048285	8:12940869-13373167	2.49589	1.96893	1.02127	0.715586	1.48019	0.859771	2.38073	1.34807	3.39245	1.82275
-	XLOC_049976	9:97305781-97305981	3.77275	3.87225	4.02875	0.717158	3.73752	2.00492	4.61304	2.53592	4.00528	2.73425
VCAN	XLOC_039444	5:82767283-82878122	1.15287	1.01557	1.55742	0.893261	1.23373	0.863502	2.22119	1.73147	0.947412	1.17233
RP11-390P2.4	XLOC_042733	6:138743179-139018425	1.01258	1.00882	1.26472	0.0226164	0.570181	0.0798525	1.82756	1.81272	0.343976	1.47326
RSPO4	XLOC_031083	20:939094-982940	1.22883	1.62935	1.18566	1.34485	1.91051	1.5159	1.76027	0.9369	1.32604	0.755238
NID2	XLOC_015523	14:52471427-52535777	1.10131	1.15914	1.48932	1.23598	2.03931	1.52948	1.69065	0.930601	1.32975	0.584251
TUBB2B	XLOC_042988	6:3224516-3457256	0.58701	0.539164	0.787725	0.581573	0.792722	1.21124	0.710622	0.223361	0.300815	0.0901624
RPS6KL1	XLOC_015746	14:75370656-75390099	1.59505	1.76171	1.45148	1.28312	1.13456	1.64429	1.53979	1.12959	1.76651	0.979221
U1,ZNF354B	XLOC_040170	5:178107231-178366360	1.09837	1.27815	1.85064	1.73203	1.83261	1.70602	2.39998	1.90694	1.96047	1.55212
CTC-529P8.1	XLOC_039921	5:148442879-148489350	0.264945	0.27833	0.596267	0.683777	0.59007	0.755153	1.4538	0.121214	0.321582	0.637582
KRTAP2-3	XLOC_022316	17:39215494-39216344	1.24517	2.64576	2.15486	2.33708	1.33462	3.47895	2.85669	1.35594	1.76707	1.69106
PKIB,RP11-574H13.2	XLOC_042648	6:122764492-123047518	1.01875	1.60481	0.794927	1.24838	1.63614	2.29166	1.00202	0.942841	0.926675	1.40054
BMP7	XLOC_031623	20:55743803-55841743	1.55158	1.78173	1.44195	1.91231	1.85109	2.219	1.48872	1.97128	1.37641	1.4581
SYTL4	XLOC_058523	X:99899194-99987126	0.39036	0.80592	0.260893	1.47105	0.873372	0.699703	0.440984	0.418762	0.0195311	0.493237
BEX5	XLOC_058552	X:101408679-101411029	0.57862	0.952878	0.917531	1.86085	1.48228	1.06906	0.427005	1.21582	1.14472	0.41354
FIBCD1	XLOC_051473	9:133777824-133820907	2.50107	2.96392	2.92148	2.7034	3.44969	3.31628	2.21283	2.98115	2.35109	2.64572
MT1F	XLOC_018844	16:56691605-56694610	2.94516	2.69666	3.01558	3.44476	2.42647	2.8223	1.90299	3.08311	2.54801	2.45213
RP11-108M9.4	XLOC_002861	1:17215032-17216144	0.888585	1.07169	1.48672	1.85637	1.281	1.41033	0.59473	1.4355	0.0922074	1.81256
IL24	XLOC_002201	1:207070776-207077484	3.438	5.40295	3.41069	3.36656	3.75259	4.24576	4.15388	2.63566	3.7896	3.84221
NRCAM	XLOC_046582	7:107788081-108097161	0.97695	1.33844	1.17043	0.831431	1.25022	1.15224	1.30826	0.177127	0.87787	1.4243
AC009403.2	XLOC_046966	7:155403924-155574179	1.63044	2.41463	1.35215	1.31916	1.53084	1.80923	2.50179	1.02708	1.30712	0.791622
SCG5	XLOC_016441	15:32933876-32989299	1.37786	1.35657	0.498353	0.475666	1.16746	0.954926	1.12603	0.32172	0.436844	0.290625
-	XLOC_031450	20:37090189-37090686	1.3957	2.64381	1.38856	0.963814	0.78836	1.29682	2.12237	0.9775	0.134655	1.13146
CTD-2006C1.2	XLOC_024357	19:12098431-12167127	1.68546	1.52607	2.53638	1.57516	1.73195	1.4806	1.19393	1.20715	1.8041	1.61055
-	XLOC_030473	20:2806330-2807401	1.29382	0.654069	1.64542	0.559521	1.24076	0.618088	0.569131	0.691409	1.27039	0.166638
C1orf213	XLOC_000362	1:23685940-23698332	0.86845	0.191954	1.59943	0.939663	1.19576	0.544446	1.23045	0.226496	0.89222	0.476589
GUSBP4,LINC00680	XLOC_043630	6:58246050-58287779	1.12625	1.13474	2.63777	1.31025	1.13026	1.02376	1.08823	1.50445	0.875245	1.11321
RP11-154P18.1	XLOC_050947	9:70645649-70646521	1.62437	2.85849	3.00735	2.69624	2.24704	2.21048	1.35708	0.71864	2.89036	2.48523
LIMD2	XLOC_022703	17:61699682-61778532	1.87708	1.09616	1.96515	1.56432	2.47859	1.80651	1.41703	0.66968	1.11183	0.550172
NPTXR	XLOC_033389	22:39214456-39239987	1.08869	0.551924	1.22183	0.961468	1.83324	1.82121	0.143811	0.327078	0.600707	0.0635444
-	XLOC_031088	20:1385800-1398973	1.64924	1.51865	3.14112	1.55116	2.74437	1.84533	1.33947	0.625813	0.891163	1.06482
LINC00085,MIR125A	XLOC_025140	19:52196506-52215640	1.99385	1.68522	2.63727	2.00434	2.27992	2.23295	0.427799	1.57779	1.75621	0.858705
AC006262.5	XLOC_026275	19:46604379-46718160	5.0901	6.09395	5.09595	6.1058	4.13151	5.39132	5.03446	6.70936	4.32691	6.28842
OLR1	XLOC_011731	12:10310901-10344400	3.91571	4.02225	3.94839	5.1138	2.68127	4.28733	4.37962	5.85152	3.99769	4.36318
U47924.27	XLOC_010349	12:7072408-7073610	2.42824	4.23093	3.74785	4.24879	3.42644	3.59523	4.15261	4.09453	3.35503	3.46488
FAAH2	XLOC_057176	X:57313138-57515629	0.135443	0.885364	0.447029	0.859874	0.281075	0.463162	1.04116	1.25855	0.0271682	0.512014
CGN	XLOC_001531	1:151482985-151511168	2.87638	2.25344	2.78631	2.74698	1.80609	2.04545	3.01111	2.76952	2.41848	2.05101
MTUS1	XLOC_048307	8:17433941-17718578	1.36373	1.89528	1.93897	1.57711	0.898619	1.06254	2.31038	2.74038	1.87822	1.93936
SERPINB13	XLOC_023421	18:61254028-61271873	2.25169	2.30605	1.81391	2.85004	0.636534	1.61453	2.47891	3.56636	1.92557	2.66707
CCR3	XLOC_033869	3:46204983-46308197	1.42857	1.04423	0.701673	1.57862	0.120551	0.274041	1.25014	2.53758	0.853573	1.32203
-	XLOC_004336	1:168186189-168186489	3.36246	2.02785	2.66625	2.43791	1.05413	0.447452	2.4016	2.23753	2.2701	2.81837
RP11-114H23.1,RP11-114H23.2,RP11-114H23.3,SNORA70	XLOC_012408	12:75918587-76377795	2.02113	2.12769	1.35359	2.99563	1.54071	1.84229	2.27226	2.59928	2.44472	3.86497
AC012146.7	XLOC_020388	17:5008835-5078329	0.820714	1.0658	0.0686983	1.12388	0.595093	0.766671	1.00793	1.51565	1.45147	1.72213
ZNF789	XLOC_045103	7:99070463-99101273	1.54953	1.61807	1.17765	0.893549	0.98194	1.17043	1.41428	1.01772	2.04605	2.31209
AL391994.1	XLOC_004940	1:235294497-235507847	0.743748	2.22756	1.33913	1.4525	2.13012	1.22021	2.11516	1.75281	1.44588	2.91246
ZNF704	XLOC_048786	8:81540685-81787016	0.556738	0.771539	0.86336	0.479851	1.24375	0.282392	0.953809	1.50247	0.70711	2.05352
RP11-143E21.7	XLOC_012855	12:130634893-130646801	2.00277	0.747912	0.60446	1.27161	1.08796	1.00384	0.104323	1.00689	1.20242	2.1104
SNORD17	XLOC_031223	20:17922240-18039832	2.11842	1.88197	0.484695	2.24916	0.0394894	1.67552	1.41216	0.851943	2.92946	2.10234
SLX4IP	XLOC_030540	20:10415926-10617477	1.26066	1.687	0.730957	0.851591	0.941512	0.805276	0.946139	1.41575	1.52054	1.1451
CTD-3149D2.4	XLOC_025816	19:17830050-17845325	2.12338	2.2621	1.84892	2.56626	3.08689	2.84905	2.36298	3.19285	3.62318	2.41948
LETM2	XLOC_047354	8:38243724-38267045	3.95505	4.34468	2.12936	2.57458	2.72805	2.99912	3.12754	3.16658	3.73024	3.68693
CUEDC1	XLOC_022618	17:55938603-56032687	3.67106	4.08015	2.63611	2.98425	3.09907	2.72268	2.89739	3.47693	3.40614	3.36882
-	XLOC_048407	8:29525377-29527039	2.82875	3.05742	0.809258	1.85034	0.881547	1.48875	1.3951	2.23279	2.5457	3.12985
FAM171A1	XLOC_006296	10:15253641-15413097	1.7032	1.78754	0.310363	0.827567	0.673131	0.340277	0.664064	1.10337	1.12529	1.64129
AC103801.2,GAS2	XLOC_007539	11:22644078-22834601	2.84425	2.92175	0.0467844	1.03794	1.17398	1.00102	1.83302	1.99339	2.66415	2.60105
TPTEP1	XLOC_032437	22:17082776-17185367	2.5034	2.40573	0.80009	0.264344	1.2159	0.0665921	0.634222	0.306111	1.4344	1.86946
-	XLOC_029017	2:64304308-64304566	3.75347	3.42362	1.16592	1.38354	1.54029	2.81727	2.90065	1.13434	2.77542	3.40268
-	XLOC_026096	19:39288995-39289248	3.15553	4.03812	1.8217	3.3848	3.12323	3.51573	3.33398	3.20191	3.7648	3.58195
NOP14-AS1	XLOC_036454	4:2936625-2965112	3.02626	3.47167	1.91894	2.4286	1.72411	2.51077	1.9171	1.83611	2.13425	2.94922
RP11-977G19.5	XLOC_012219	12:56544579-56584068	1.97557	2.69853	0.865428	1.51645	1.15627	0.654738	0.378123	0.280802	1.61488	1.18087
-	XLOC_018244	16:2730042-2730204	4.74639	6.35431	3.97368	3.50819	5.19709	4.4347	4.92307	4.74061	4.47142	5.74521
MFI2	XLOC_036391	3:196715491-196756723	4.26396	4.91993	3.32313	2.78562	3.89771	3.53446	3.01068	2.93497	2.70865	3.88067
HOXA10,HOXA9,MIR196B,RP1-170O19.20	XLOC_045883	7:27201998-27219880	4.15352	3.73018	3.53691	3.63515	3.68952	3.69501	3.94069	4.17144	3.91472	3.79848
NKX3-1	XLOC_048354	8:23536205-23540440	1.8958	0.592866	0.298729	1.08604	0.517366	0.424535	0.109187	1.18725	0.842046	0.632426
AL353629.1	XLOC_051119	9:96208775-96328397	8.43594	8.92715	9.59695	8.02162	8.90751	9.20895	10.167	8.99193	9.96775	8.02871
SRP9P1	XLOC_006887	10:93558068-93625126	1.72063	3.15943	2.84355	1.54185	3.12505	1.2424	3.13084	2.08933	2.90224	1.62499
SNORA73B	XLOC_000472	1:28832454-28865840	1.36897	3.28916	3.12751	2.44396	3.10883	2.90923	4.2287	2.44998	3.58684	4.11522
CTC-297N7.10	XLOC_020480	17:10581346-10718481	1.15548	3.51171	2.05584	2.74544	3.50578	2.27968	4.58517	1.28202	3.54308	3.40433
-	XLOC_043328	6:31821189-31821345	1.62114	4.10443	2.63629	1.90616	4.60968	3.88808	3.59002	3.36755	3.72754	4.42718
FOLR3	XLOC_008166	11:71825843-71850936	1.69887	3.99675	2.44372	2.67019	2.53963	2.33671	2.87695	2.55741	2.21219	3.05285
SNORD118,TMEM107	XLOC_021785	17:8075800-8079721	3.45107	5.38422	3.39266	3.98652	4.65615	3.51463	4.9866	4.01439	3.2813	3.74722
ARRDC3	XLOC_040873	5:90664540-90679176	2.19497	1.86259	3.22687	3.60792	2.97053	2.75165	4.27787	4.33325	4.22918	2.54752
-	XLOC_039382	5:76035095-76035371	1.61203	1.30606	1.51795	2.05042	1.82902	1.44853	3.03055	2.32585	2.3696	1.60576
SKA1	XLOC_023318	18:47901364-47920585	2.78963	1.87991	2.83349	2.42577	2.30583	1.47902	3.45649	3.2902	3.93934	3.16825
AC010620.1,ZNF714	XLOC_024580	19:21264861-21309393	1.53026	1.17953	1.67927	1.09518	1.23768	1.17114	3.0844	2.12917	1.70733	1.69639
FABP5P7	XLOC_009391	11:59480295-59573354	0.848486	0.183658	0.438421	0.405622	0.443925	0.642877	2.2406	2.3564	1.08824	2.28474
HBEGF	XLOC_041218	5:139712427-139726216	3.95674	4.47739	4.41859	3.78945	4.07741	3.79971	5.45082	3.62703	5.32221	3.66501
GFOD1-AS1	XLOC_041687	6:13358061-13487787	1.56649	1.13346	2.17638	1.88613	1.86159	0.890454	2.9978	1.09923	2.60786	0.664128
RP11-261C10.3,RP11-261C10.6	XLOC_005001	1:243218159-243265051	3.86784	3.45532	3.8287	3.29925	3.84184	3.18923	5.22922	3.28223	4.13846	4.20831

## Sheet: GO-BF
Induced by Tcf7l1 and Tcf7l1ΔN, not by Tcf7l1*
GO: Biological Functions [Top100, ranked by P-value]
	Term	Overlap	P-value	Q-value	Z-score	Combined Score	Genes
1	inflammatory response (GO:0006954)	34/376	5.72978e-12	1.64387e-08	-2.38233	42.6999	IL1RN;SERPINA1;CSF1;ITGB2;PTAFR;SAA4;TNF;INS;PTGS1;C3;CCL5;BDKRB2;BDKRB1;NLRP3;CD14;ITGB6;APOL3;CD163;IGFBP4;IL36G;TNFRSF1B;ASS1;CXCL10;CXCL11;IL6;THEMIS2;ELF3;TNIP3;SAA1;SAA2;NUPR1;S100A9;CHST2;TLR2
2	response to lipopolysaccharide (GO:0032496)	22/228	1.26938e-08	1.82093e-05	-2.40601	26.2582	CSF3;IL1RN;PTGIR;PTAFR;SOD2;TNFRSF1B;TNF;ASS1;CXCL10;IL6;TNIP3;CCL5;ZC3H12A;LTA;NLRP3;BDKRB1;ALPL;CD14;S100A9;CAMP;TLR2;IL12RB2
3	response to molecule of bacterial origin (GO:0002237)	22/243	3.64958e-08	3.49021e-05	-2.43866	25.0279	CSF3;IL1RN;PTGIR;PTAFR;TNFRSF1B;SOD2;TNF;ASS1;CXCL10;IL6;TNIP3;CCL5;ZC3H12A;LTA;BDKRB1;ALPL;NLRP3;CD14;S100A9;CAMP;IL12RB2;TLR2
4	negative regulation of multi-organism process (GO:0043901)	16/133	8.38952e-08	6.01738e-05	-2.17526	21.1398	IFITM3;RSAD2;MX1;ISG15;TNF;ISG20;SLPI;OAS3;CCL5;LTA;TRIM15;TIMP1;ZP3;TRIM10;CAMP;TLR2
5	secretion by cell (GO:0032940)	28/415	1.76014e-07	0.000100997	-2.40936	22.1671	MEG3;EXOC3L1;IL1RN;SERPINA1;SERPINE2;EXOC3L4;PROS1;TNFAIP2;NRXN2;GRM4;RAB26;CCL5;NLRP3;SLC17A7;TIMP1;LGI3;IGF2;SLC6A11;INHBA;POU2F2;SYT8;SYT7;SYTL2;LAT2;CXCL10;IL6;VGF;LY6E
6	cellular response to lipopolysaccharide (GO:0071222)	14/110	2.93405e-07	0.000140296	-2.28995	20.3159	CSF3;PTAFR;TNFRSF1B;TNF;ASS1;CXCL10;IL6;CCL5;TNIP3;ZC3H12A;NLRP3;CD14;CAMP;TLR2
7	epithelium development (GO:0060429)	21/256	3.48102e-07	0.000142672	-2.34784	20.79	WNT10A;CDSN;SERPINE2;CRABP2;WNT7B;KRT34;INHBA;KRT31;MEOX1;DLL1;CASP14;SHH;ELF3;KRT16;KRT15;COL7A1;KRT14;FGFR3;FGFR1;SPRR2D;WNT4
8	cellular response to molecule of bacterial origin (GO:0071219)	14/116	5.27282e-07	0.000169743	-2.31073	20.06	CSF3;PTAFR;TNFRSF1B;TNF;ASS1;CXCL10;IL6;TNIP3;CCL5;ZC3H12A;NLRP3;CD14;CAMP;TLR2
9	acute-phase response (GO:0006953)	9/39	5.3248e-07	0.000169743	-2.36149	20.5007	IL1RN;CD163;IL6;SERPINA1;SAA4;SAA1;SAA2;ASS1;INS
10	negative regulation of viral genome replication (GO:0045071)	9/40	6.40495e-07	0.000183758	-2.32629	20.0105	IFITM3;ISG20;RSAD2;SLPI;CCL5;OAS3;MX1;ISG15;TNF
11	acute inflammatory response (GO:0002526)	10/59	1.50179e-06	0.000345173	-2.11814	16.8847	IL1RN;CD163;IL6;SERPINA1;SAA4;SAA1;SAA2;NUPR1;ASS1;INS
12	negative regulation of viral process (GO:0048525)	11/75	1.60847e-06	0.000345173	-2.12243	16.9189	IFITM3;ISG20;SLPI;RSAD2;OAS3;CCL5;MX1;TRIM15;ISG15;TRIM10;TNF
13	extracellular matrix organization (GO:0030198)	24/359	1.60899e-06	0.000345173	-2.35069	18.7384	COL27A1;WNT3A;TMPRSS6;MMP1;COL12A1;APLP1;ITGB2;BGN;NID1;FBLN2;TNF;MMP9;FBLN5;ELF3;ADAMTSL4;COL7A1;COL6A2;COL5A3;COL5A2;COL8A2;ITGA7;ITGB6;TIMP1;CTSD
14	extracellular structure organization (GO:0043062)	24/360	1.68436e-06	0.000345173	-2.35038	18.7359	COL27A1;WNT3A;MMP1;TMPRSS6;ITGB2;COL12A1;APLP1;BGN;NID1;FBLN2;MMP9;TNF;FBLN5;ELF3;ADAMTSL4;COL7A1;COL5A3;COL6A2;COL5A2;COL8A2;ITGA7;ITGB6;TIMP1;CTSD
15	cellular response to biotic stimulus (GO:0071216)	14/132	2.1577e-06	0.000408117	-2.28254	17.8128	CSF3;PTAFR;TNFRSF1B;TNF;ASS1;CXCL10;IL6;TNIP3;CCL5;ZC3H12A;NLRP3;CD14;CAMP;TLR2
16	cellular response to lipid (GO:0071396)	22/315	2.27601e-06	0.000408117	-2.49741	19.4896	SREBF1;CPT1A;CSF3;DGAT2;WNT3A;WNT7B;PTAFR;SERPINB9;INHBA;TNFRSF1B;TNF;ASS1;CXCL10;WNT6;IL6;TNIP3;CCL5;ZC3H12A;NLRP3;CD14;CAMP;TLR2
17	cytokine-mediated signaling pathway (GO:0019221)	23/342	2.4303e-06	0.00041015	-2.35557	18.3711	CAMK2B;IFITM3;CD74;CSF3;MX2;TNFRSF18;MX1;PTAFR;EBI3;IFI6;ISG15;TNFRSF1B;TNF;ISG20;CXCL10;SOCS3;CXCL11;IL6;OAS2;OAS3;CCL5;IL21R;IL12RB2
18	regulation of acute inflammatory response (GO:0002673)	10/66	3.70775e-06	0.000590974	-2.1191	15.7529	C3;IL6;CFH;PROS1;NLRP3;ZP3;TNF;CFB;C2;INS
19	epidermis development (GO:0008544)	13/120	4.03482e-06	0.000609258	-2.11571	15.6632	WNT10A;CDSN;CRABP2;KRT34;INHBA;KRT31;CASP14;ELF3;KRT16;COL7A1;KRT15;KRT14;SPRR2D
20	regulation of multi-organism process (GO:0043900)	21/306	5.01848e-06	0.000719901	-2.35086	17.0118	IFITM3;RSAD2;MX1;TMPRSS2;ISG15;INHBA;DDX60;TNF;CACNA1H;ISG20;P2RX7;SLPI;OAS3;CCL5;LTA;TRIM15;TIMP1;ZP3;TRIM10;CAMP;TLR2
21	cellular response to cytokine stimulus (GO:0071345)	27/471	5.55984e-06	0.00075958	-2.4144	17.342	CAMK2B;IFITM3;CSF3;EBI3;PTAFR;IFI6;TNF;SOCS3;CCL5;IL21R;CAMP;IL12RB2;CD74;MX2;TNFRSF18;MX1;PDE2A;ISG15;TNFRSF1B;ASS1;ISG20;CXCL10;CXCL11;IL6;OAS2;OAS3;HCLS1
22	regulation of viral genome replication (GO:0045069)	9/57	8.4659e-06	0.00110403	-2.17491	14.8085	IFITM3;ISG20;SLPI;RSAD2;OAS3;CCL5;MX1;ISG15;TNF
23	collagen catabolic process (GO:0030574)	10/74	9.26235e-06	0.00115538	-2.10453	14.2336	MMP1;COL5A3;COL6A2;COL7A1;COL5A2;COL12A1;COL8A2;MMP9;CTSD;KLK6
24	regulation of symbiosis, encompassing mutualism through parasitism (GO:0043903)	15/174	9.80042e-06	0.00117156	-2.27988	15.3878	IFITM3;RSAD2;MX1;TMPRSS2;ISG15;TNF;ISG20;SLPI;OAS3;CCL5;LTA;TRIM15;TRIM10;CAMP;TLR2
25	regulation of inflammatory response (GO:0050727)	18/247	1.12641e-05	0.00129267	-2.3701	15.7637	CFH;PROS1;PDE2A;TNFRSF1B;TNF;INS;C2;C3;IL6;CCL5;LTA;SAA1;NLRP3;ZP3;S100A9;CFB;TGM2;TLR2
26	regulation of humoral immune response (GO:0002920)	8/45	1.25529e-05	0.00138517	-2.27959	15.0041	C3;CFH;PROS1;LTA;ZP3;TNF;CFB;C2
27	regulation of endopeptidase activity (GO:0052548)	22/354	1.31174e-05	0.00139385	-2.37469	15.6153	CYFIP2;NGFR;SERPINA1;SERPINE2;WNT3A;PROS1;IFI6;A2ML1;SERPINB9;TNF;WFDC2;BBC3;C3;IL6;SLPI;COL7A1;TNFSF10;NLRP3;CTSH;TIMP1;S100A9;XDH
28	multicellular organismal catabolic process (GO:0044243)	10/80	1.71943e-05	0.00176181	-2.09279	13.2713	MMP1;COL5A3;COL7A1;COL6A2;COL5A2;COL12A1;COL8A2;CTSD;MMP9;KLK6
29	skeletal system development (GO:0001501)	14/162	1.89113e-05	0.00187091	-2.16943	13.6269	CDKN1C;KLF10;IGFBP4;COL12A1;IGF2;PTH1R;AEBP1;MMP9;PHEX;SHH;COL5A2;ALPL;FGFR3;FGFR1
30	cellular response to type I interferon (GO:0071357)	9/65	2.18569e-05	0.00202282	-2.08048	12.9058	IFITM3;ISG20;SOCS3;OAS2;OAS3;MX2;MX1;IFI6;ISG15
31	type I interferon signaling pathway (GO:0060337)	9/65	2.18569e-05	0.00202282	-2.07764	12.8882	IFITM3;ISG20;SOCS3;OAS2;OAS3;MX2;MX1;IFI6;ISG15
32	collagen metabolic process (GO:0032963)	10/83	2.29869e-05	0.00206092	-2.08688	12.9065	MMP1;COL5A3;COL7A1;COL6A2;COL5A2;COL12A1;COL8A2;CTSD;MMP9;KLK6
33	response to type I interferon (GO:0034340)	9/66	2.43902e-05	0.00212047	-2.07749	12.7893	IFITM3;ISG20;SOCS3;OAS2;OAS3;MX2;MX1;IFI6;ISG15
34	regulation of peptidase activity (GO:0052547)	22/372	2.69546e-05	0.00227449	-2.35274	14.3188	CYFIP2;NGFR;SERPINA1;SERPINE2;WNT3A;PROS1;IFI6;A2ML1;SERPINB9;TNF;WFDC2;BBC3;C3;IL6;SLPI;COL7A1;TNFSF10;NLRP3;CTSH;TIMP1;S100A9;XDH
35	regulation of response to wounding (GO:1903034)	21/347	2.99414e-05	0.00239253	-2.40474	14.5136	SERPINE2;CFH;TMPRSS6;PROS1;PDE2A;TNFRSF1B;TNF;INS;C2;C3;IL6;CCL5;LTA;SAA1;NLRP3;ZP3;S100A9;CFB;WNT4;TGM2;TLR2
36	defense response to virus (GO:0051607)	13/147	3.00213e-05	0.00239253	-2.16495	13.0664	IFITM3;RSAD2;MX2;MX1;ISG15;DDX60;ISG20;CXCL10;IL6;OAS2;OAS3;NLRP3;TRIM22
37	multicellular organismal macromolecule metabolic process (GO:0044259)	10/89	3.97188e-05	0.00307981	-2.09326	12.1051	MMP1;COL7A1;COL5A3;COL6A2;COL12A1;COL5A2;COL8A2;CTSD;MMP9;KLK6
38	negative regulation of secretion (GO:0051048)	13/152	4.14664e-05	0.00308822	-2.22475	12.8594	CD74;SREBF1;IL1RN;RSAD2;LIF;INHBA;LRRC32;TNF;INS;IL6;HMOX1;NLRP3;PIM3
39	defense response to other organism (GO:0098542)	20/328	4.198e-05	0.00308822	-2.27287	13.1376	IFITM3;PGLYRP4;RSAD2;MX2;MX1;ISG15;DDX60;TNF;ISG20;CXCL10;IL6;VGF;OAS2;OAS3;LTA;NLRP3;S100A9;TRIM22;CAMP;TLR2
40	regulation of leukocyte migration (GO:0002685)	11/110	4.40676e-05	0.0030979	-2.22232	12.8384	CXCL10;CD74;IL6;CCL5;MMP28;HMOX1;BDKRB1;PADI2;ZP3;TNF;TLR2
41	endodermal cell differentiation (GO:0035987)	6/26	4.42711e-05	0.0030979	-2.29476	13.2569	COL7A1;ITGB2;COL12A1;ITGA7;INHBA;MMP9
42	negative regulation of secretion by cell (GO:1903531)	12/135	5.79018e-05	0.00395524	-2.15792	11.9391	SREBF1;IL1RN;IL6;RSAD2;LIF;HMOX1;NLRP3;PIM3;INHBA;LRRC32;TNF;INS
43	regulation of cytokine production (GO:0001817)	25/482	6.02511e-05	0.00396008	-2.40061	13.279	PGLYRP4;EBI3;LRRC32;DLL1;TNF;INS;C3;ZC3H12A;TNFRSF8;HMOX1;NLRP3;CD14;IL12RB2;CD74;RSAD2;IL36G;ISG15;INHBA;P2RX7;IL6;LTA;SAA1;TRIM15;ZP3;TLR2
44	multicellular organismal metabolic process (GO:0044236)	10/94	6.07332e-05	0.00396008	-2.05602	11.3728	MMP1;COL7A1;COL5A3;COL6A2;COL12A1;COL5A2;COL8A2;CTSD;MMP9;KLK6
45	extracellular matrix disassembly (GO:0022617)	11/116	6.87611e-05	0.0043839	-2.07075	11.2438	MMP1;COL7A1;COL5A3;COL6A2;COL12A1;COL5A2;COL8A2;TIMP1;NID1;CTSD;MMP9
46	regulation of nitric oxide biosynthetic process (GO:0045428)	7/44	8.30318e-05	0.00517718	-2.19632	11.5603	IL6;ZC3H12A;SOD2;TNF;ASS1;TLR2;INS
47	regulation of immune effector process (GO:0002697)	17/264	8.48126e-05	0.00517718	-2.35064	12.3726	PGLYRP4;CD74;CFH;RSAD2;PROS1;DDX60;TNF;INS;C2;C3;IL6;LTA;HMOX1;TRIM15;ZP3;CFB;TLR2
48	regulation of macrophage differentiation (GO:0045649)	5/19	0.000115699	0.00683207	-2.24655	11.2016	CSF1;LIF;HCLS1;INHBA;GATA2
49	positive regulation of cytokine production (GO:0001819)	19/327	0.00011908	0.00683207	-2.33016	11.6185	CD74;RSAD2;EBI3;IL36G;TNF;INS;C3;P2RX7;IL6;LTA;SAA1;TNFRSF8;HMOX1;NLRP3;TRIM15;CD14;ZP3;IL12RB2;TLR2
50	signal release (GO:0023061)	11/124	0.000119449	0.00683207	-2.10947	10.5181	MEG3;EXOC3L1;IL6;IL1RN;GRM4;VGF;NRXN2;SLC6A11;SLC17A7;INHBA;LY6E
51	positive regulation of nitric oxide biosynthetic process (GO:0045429)	6/32	0.000121448	0.00683207	-2.37853	11.8597	IL6;SOD2;TNF;ASS1;INS;TLR2
52	regulation of vasculature development (GO:1901342)	14/197	0.000136876	0.0075519	-2.19034	10.7019	MEG3;GATA2;C3;DLL4;CXCL10;IL6;LRG1;CTSH;HMOX1;BAI1;XDH;RAPGEF3;CAMP;WNT4
53	response to virus (GO:0009615)	16/250	0.000146108	0.00777363	-2.24566	10.9072	IFITM3;RSAD2;MX2;MX1;ISG15;DDX60;TNF;ISG20;CXCL10;IL6;OAS2;OAS3;CCL5;NLRP3;ITGB6;TRIM22
54	regulation of phosphatidylinositol 3-kinase signaling (GO:0014066)	8/66	0.000146314	0.00777363	-2.06535	10.0314	CSF3;SERPINE2;PIK3IP1;UNC5B;CCL5;HCLS1;FGFR1;INS
55	positive regulation of inflammatory response to antigenic stimulus (GO:0002863)	4/10	0.000155795	0.00812685	-1.83951	8.85281	C3;LTA;ZP3;TNF
56	regulation of viral process (GO:0050792)	12/152	0.000165267	0.00839061	-2.18867	10.4632	IFITM3;ISG20;RSAD2;SLPI;OAS3;CCL5;MX1;TMPRSS2;TRIM15;ISG15;TRIM10;TNF
57	positive regulation of response to external stimulus (GO:0032103)	14/201	0.000166701	0.00839061	-2.25089	10.7607	CD74;PDE2A;DDX60;TNF;C3;CXCL10;IL6;CCL5;LTA;TRIM15;ZP3;S100A9;TGM2;TLR2
58	response to metal ion (GO:0010038)	16/255	0.000180879	0.00890527	-2.30402	10.8775	CAMK2B;SOD2;RASGRP2;AQP3;NDRG1;CRIP1;ASS1;CACNA1H;CACNA1G;SHH;IL6;KRT16;KRT14;HMOX1;CD14;S100A9
59	regulation of hormone levels (GO:0010817)	15/229	0.000185147	0.00890527	-2.23564	10.5547	MEG3;EXOC3L1;IL1RN;DGAT2;CRABP2;INHBA;CACNA1H;KLK6;SDR16C5;IL6;SHH;SULT1E1;VGF;WNT4;LY6E
60	positive regulation of inflammatory response (GO:0050729)	9/88	0.000186238	0.00890527	-2.11877	10.0029	C3;IL6;PDE2A;LTA;ZP3;S100A9;TNF;TGM2;TLR2
61	positive regulation of immune effector process (GO:0002699)	11/133	0.000211584	0.00982431	-2.17792	10.0683	C3;CD74;IL6;RSAD2;LTA;HMOX1;TRIM15;ZP3;DDX60;TNF;TLR2
62	positive regulation of lipid biosynthetic process (GO:0046889)	7/52	0.000212306	0.00982431	-2.01249	9.30351	SREBF1;IGF2;ZP3;TNF;PLIN5;WNT4;INS
63	cell fate commitment (GO:0045165)	11/134	0.000224796	0.0102371	-2.05409	9.41127	DLL4;NOTCH3;WNT6;WNT10A;IL6;SHH;WNT3A;WNT7B;GATA2;FGFR3;WNT4
64	citrulline metabolic process (GO:0000052)	4/12	0.000274098	0.0119726	-1.83435	8.11727	PADI3;PADI2;PADI1;ASS1
65	branching involved in salivary gland morphogenesis (GO:0060445)	4/12	0.000274098	0.0119726	-1.78393	7.89415	IL6;SHH;TGM2;FGFR1
66	epithelial cell proliferation (GO:0050673)	8/73	0.000275423	0.0119726	-2.03428	9.00196	SDR16C5;IL6;SHH;COL8A2;HMOX1;NRARP;TNF;MTSS1
67	regulation of lipid storage (GO:0010883)	6/38	0.000279703	0.0119771	-2.11302	9.34959	C3;IL6;ZC3H12A;MEST;TNF;PLIN5
68	regulation of cell-cell adhesion (GO:0022407)	9/94	0.000293417	0.0121958	-2.0275	8.9345	IL1RN;SERPINE2;WNT3A;PODXL;CCL5;NRARP;TNF;ASS1;WNT4
69	positive regulation of myeloid cell differentiation (GO:0045639)	8/74	0.000299781	0.0121958	-2.03437	8.96479	KLF10;CSF1;LIF;HCLS1;ISG15;INHBA;GATA2;TNF
70	positive regulation of mononuclear cell proliferation (GO:0032946)	10/116	0.000300134	0.0121958	-2.07205	9.13083	CD74;SHH;IL6;CSF1;WNT3A;CCL5;EBI3;IGF2;ZP3;ICOSLG
71	positive regulation of peptidyl-tyrosine phosphorylation (GO:0050731)	11/139	0.000301813	0.0121958	-2.10656	9.28292	CD74;CSF3;IL6;WNT3A;CCL5;LIF;IGF2;HCLS1;CSPG4;FGFR3;INS
72	regulation of apoptotic signaling pathway (GO:2001233)	19/356	0.000332358	0.0132436	-2.35635	10.1894	CAMK2B;NGFR;CD74;UNC5B;IFI6;ACSL5;INHBA;SOD2;TNF;INS;BBC3;TNFSF10;BDKRB2;CTSH;HMOX1;BMF;S100A9;FGFR1;WNT4
73	positive regulation of intracellular transport (GO:0032388)	14/217	0.000349044	0.0135154	-2.28161	9.81987	CSF3;WNT3A;TNF;BBC3;P2RX7;CXCL10;CXCL11;IL6;SHH;P2RX2;BDKRB1;HCLS1;BMF;TLR2
74	positive regulation of humoral immune response (GO:0002922)	4/13	0.000352595	0.0135154	-1.90237	8.18767	C3;LTA;ZP3;TNF
75	tissue morphogenesis (GO:0048729)	19/358	0.000355097	0.0135154	-2.18848	9.41903	WNT10A;CSF1;WNT3A;WNT7B;NRARP;DLL1;MTSS1;DLL4;WNT6;SOCS3;SHH;IL6;CTSH;TNNI3;FGFR3;TGM2;FGFR1;LY6E;WNT4
76	positive regulation of defense response (GO:0031349)	16/272	0.000358515	0.0135154	-2.24467	9.6609	PGLYRP4;ITGB2;PDE2A;DDX60;TNF;C3;IL6;TNIP3;CCL5;LTA;TRIM15;CD14;ZP3;S100A9;TGM2;TLR2
77	positive regulation of leukocyte proliferation (GO:0070665)	10/119	0.000362735	0.0135154	-2.05079	8.82645	CD74;SHH;IL6;CSF1;WNT3A;CCL5;EBI3;IGF2;ZP3;ICOSLG
78	positive regulation of secretion (GO:0051047)	16/273	0.000372531	0.0137025	-2.22561	9.54827	INHBA;TNF;CACNA1H;SYT7;CACNA1G;INS;SYTL2;P2RX7;HCAR2;KISS1;IL6;SAA1;NLRP3;CD14;ZP3;TLR2
79	regulation of smooth muscle cell proliferation (GO:0048660)	8/77	0.000383608	0.0139313	-1.95022	8.33449	NOTCH3;IL6;PTGIR;CCL5;IGFBP3;HMOX1;TNF;TGM2
80	negative regulation of transport (GO:0051051)	19/361	0.000391743	0.0140227	-2.27948	9.72672	KCNH2;CD74;SREBF1;IL1RN;SERPINE2;RSAD2;PDE2A;LIF;INHBA;LRRC32;MMP9;TNF;INS;SHH;IL6;NLRP3;HMOX1;TRIM15;PIM3
81	positive regulation of secretion by cell (GO:1903532)	15/247	0.000397505	0.0140227	-2.19055	9.34725	INHBA;TNF;CACNA1H;SYT7;CACNA1G;INS;HCAR2;KISS1;P2RX7;IL6;SAA1;NLRP3;CD14;ZP3;TLR2
82	response to zinc ion (GO:0010043)	6/41	0.000403814	0.0140227	-2.04377	8.72094	KRT16;KRT14;SOD2;S100A9;CRIP1;ASS1
83	regulation of odontogenesis (GO:0042481)	5/26	0.000410546	0.0140227	-2.15865	9.21111	WNT6;NGFR;WNT10A;SHH;CSF1
[truncated: 120 more rows]

## Sheet: KEGG
Induced by Tcf7l1 and Tcf7l1ΔN, not by Tcf7l1*
KEGG pathway [Top100, ranked by P-value)
[truncated: 204 more rows]
