# Supplementary figures and images for: TCF7L1 promotes skin tumorigenesis independently of β-catenin through induction of LCN2
Source: eLife journal article supplement (doi:10.7554/elife.23242), 2017-05-03

Figure 5-figure supplement 1

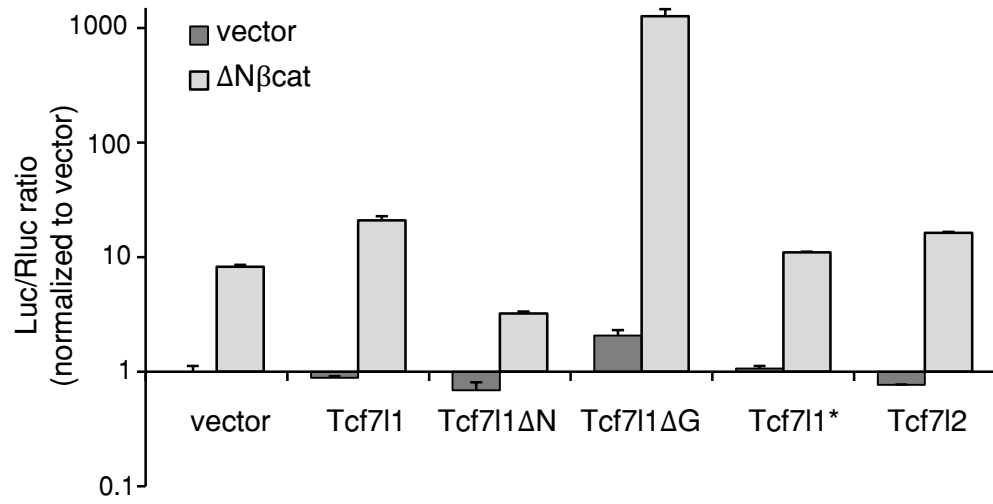

Supplement: supp [file elife-23242-supp-v1.zip › elife_poa_e23242_Figure_5_figure_supplement_1.pdf]

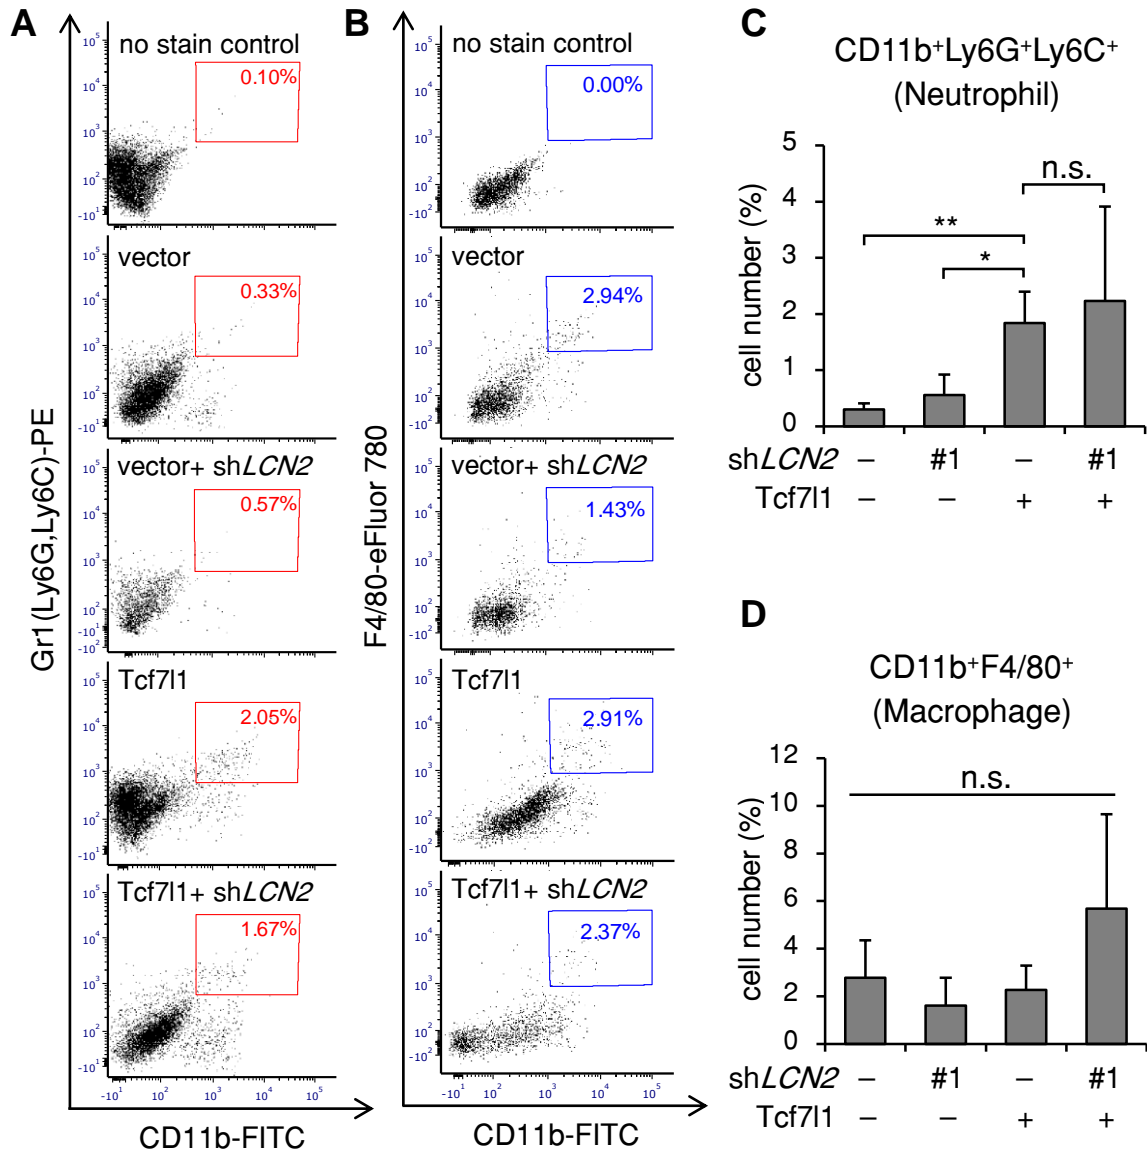

Supplement: supp [file elife-23242-supp-v1.zip › elife_poa_e23242_Figure_10_figure_supplement_3.pdf]

**A**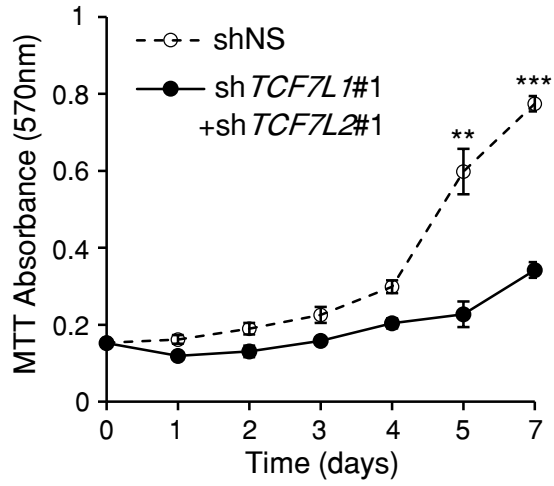**B**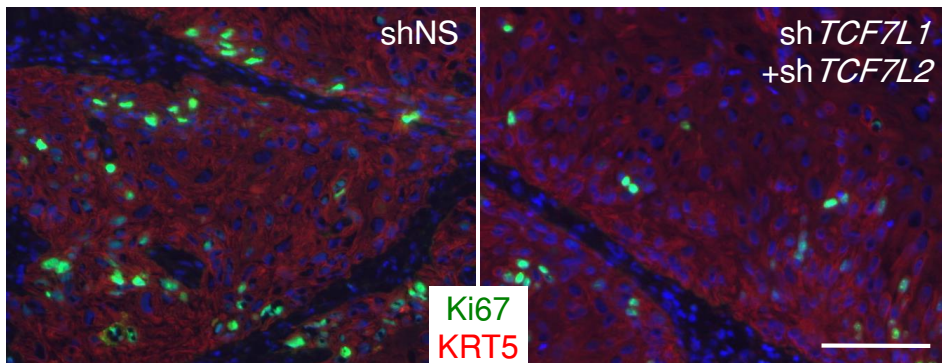**C**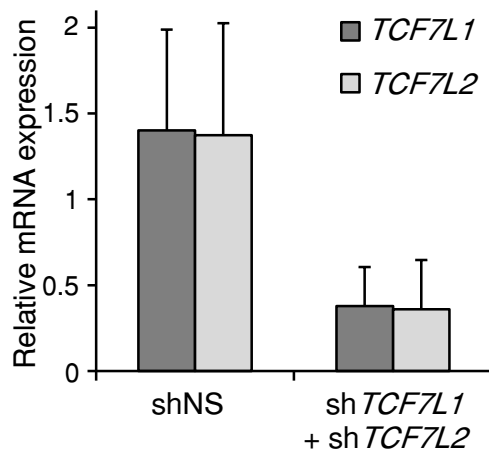

Supplement: supp [file elife-23242-supp-v1.zip › elife_poa_e23242_Figure_3_figure_supplement_1.pdf]

Figure 2-figure supplement 2

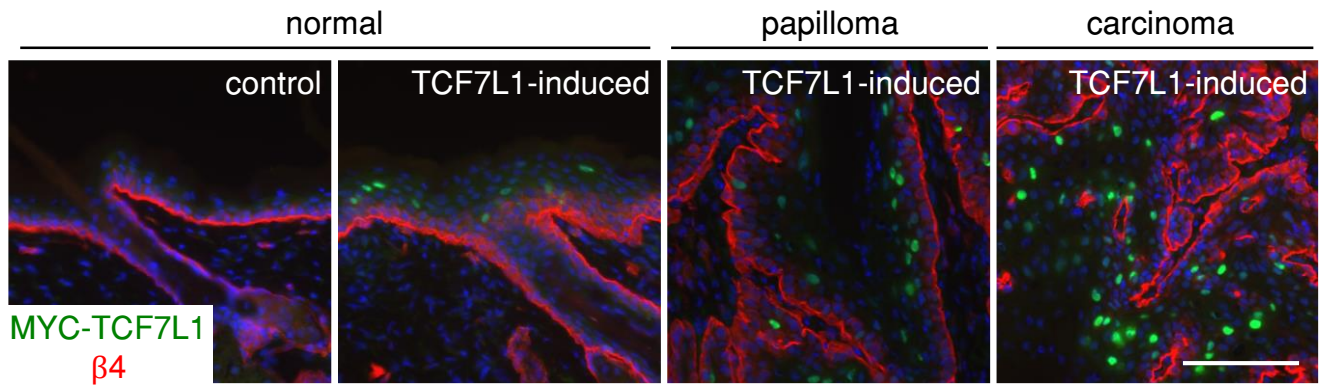

Supplement: supp [file elife-23242-supp-v1.zip › elife_poa_e23242_Figure_2_figure_supplement_2.pdf]

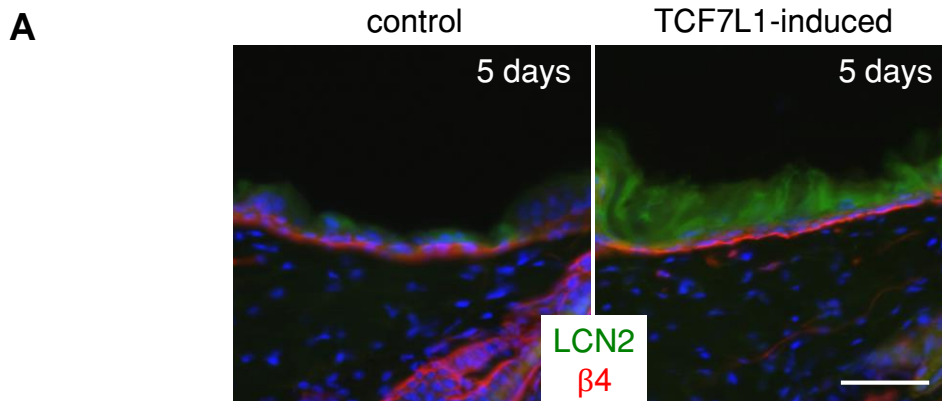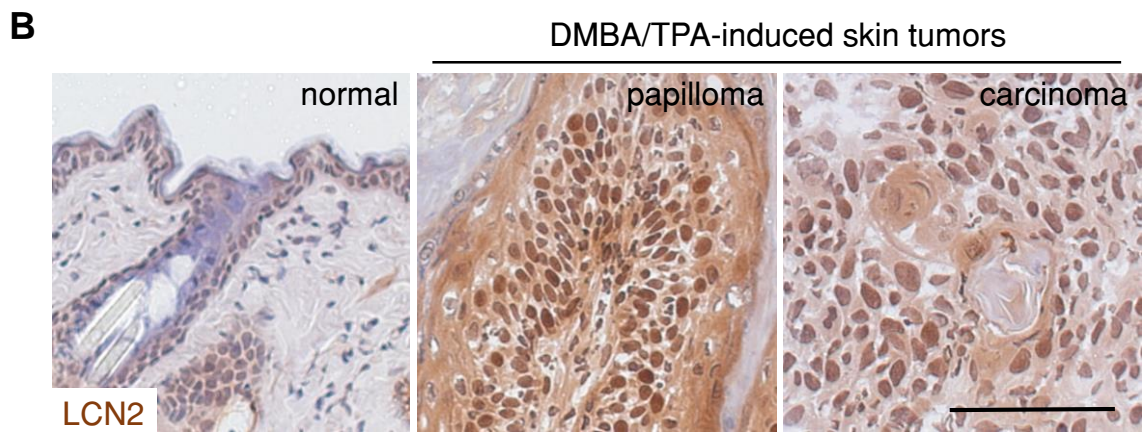

Supplement: supp [file elife-23242-supp-v1.zip › elife_poa_e23242_Figure_10_figure_supplement_1.pdf]

**A**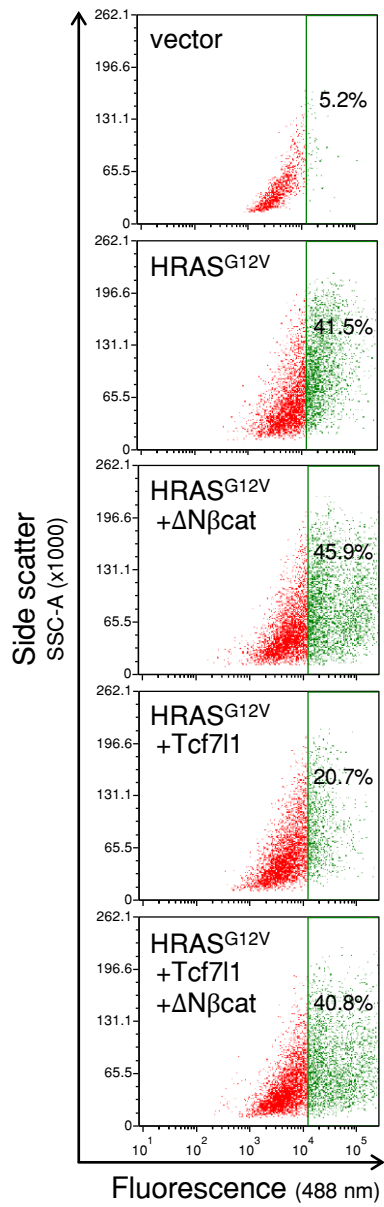**B**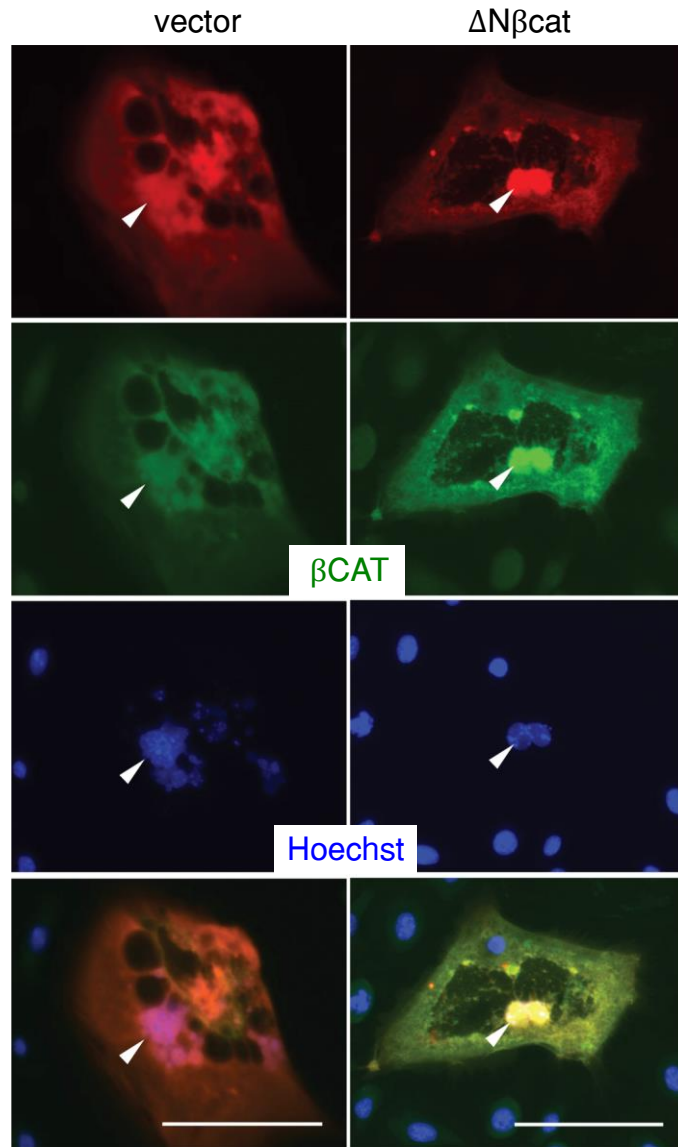

Supplement: supp [file elife-23242-supp-v1.zip › elife_poa_e23242_Figure_6_figure_supplement_2.pdf]

**A**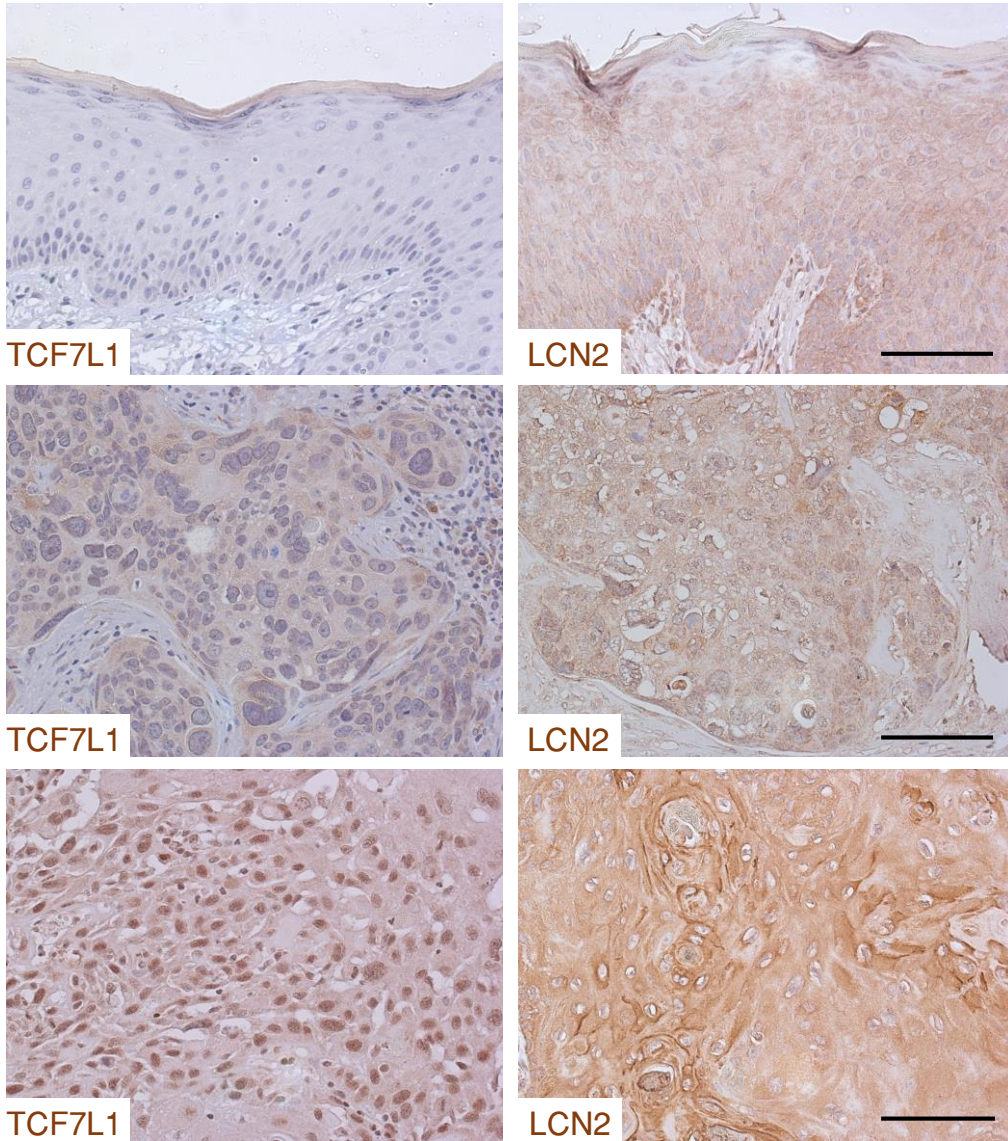**B**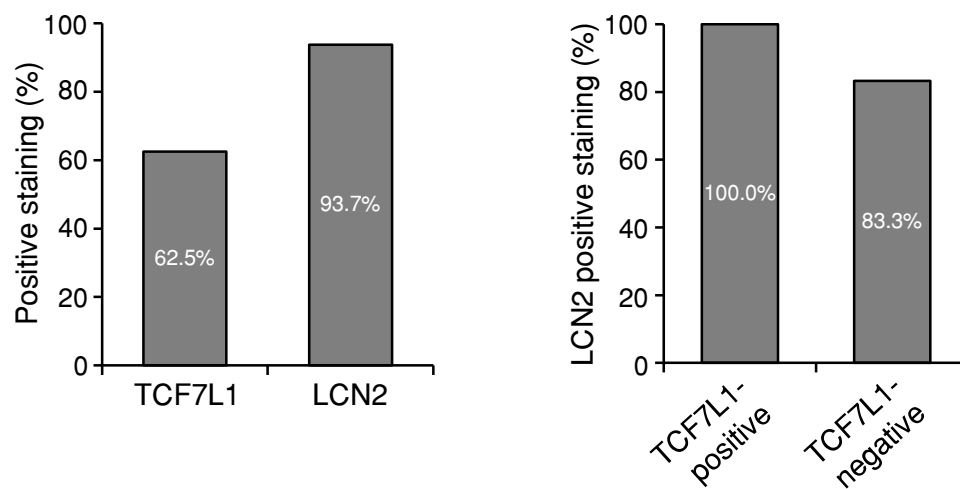

Supplement: supp [file elife-23242-supp-v1.zip › elife_poa_e23242_Figure_10_figure_supplement_2.pdf]

**A**

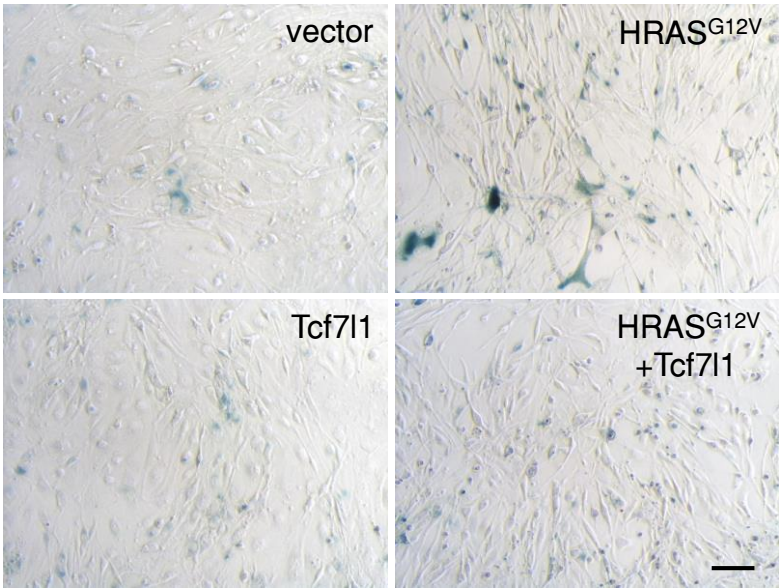

**B**

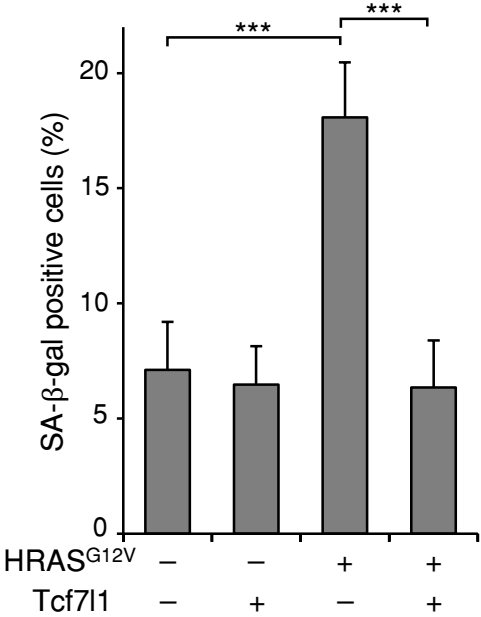

Supplement: supp [file elife-23242-supp-v1.zip › elife_poa_e23242_Figure_6_figure_supplement_1.pdf]

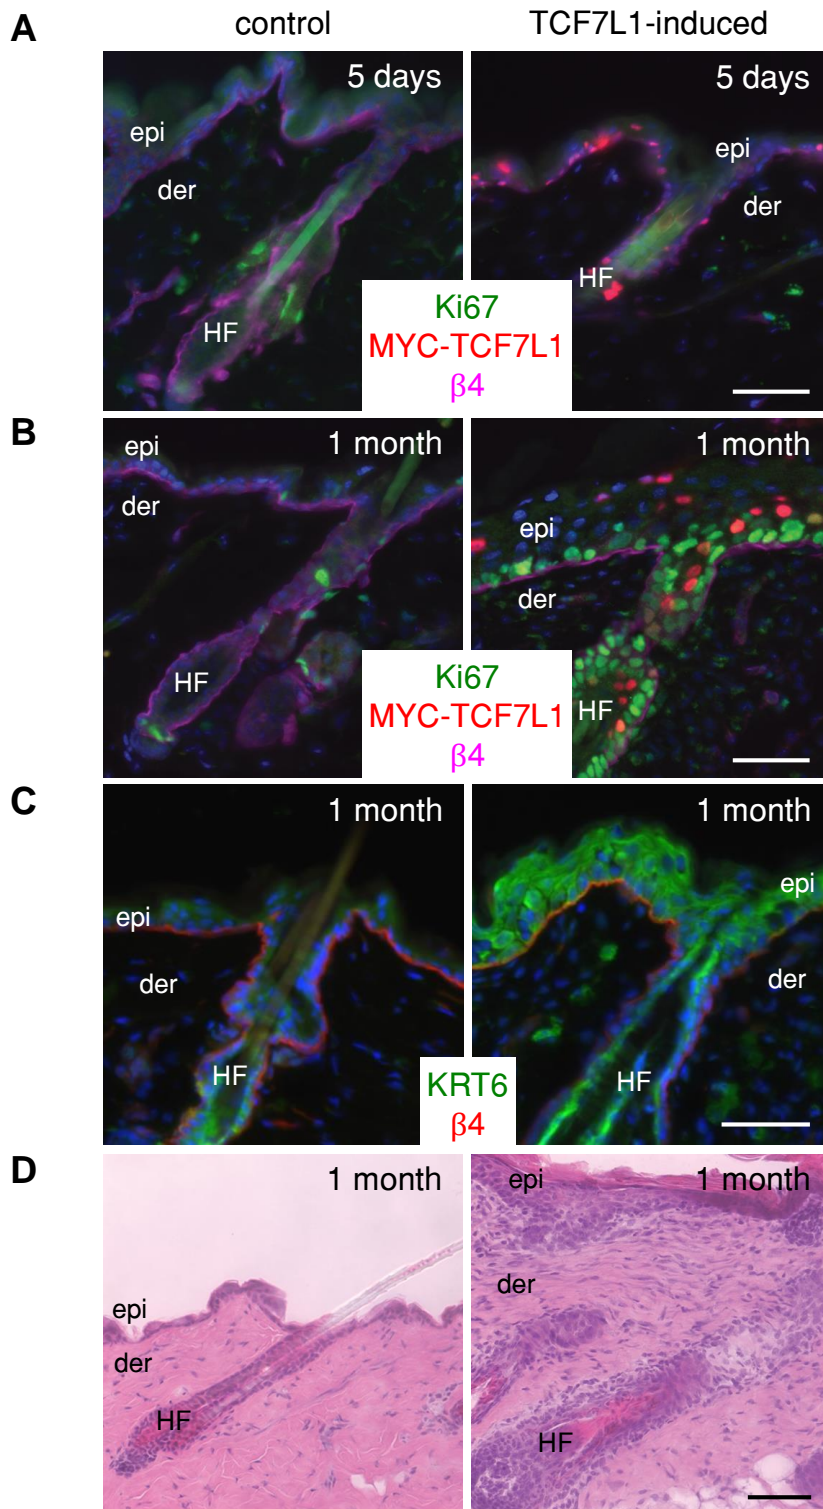

Supplement: supp [file elife-23242-supp-v1.zip › elife_poa_e23242_Figure_2_figure_supplement_1.pdf]

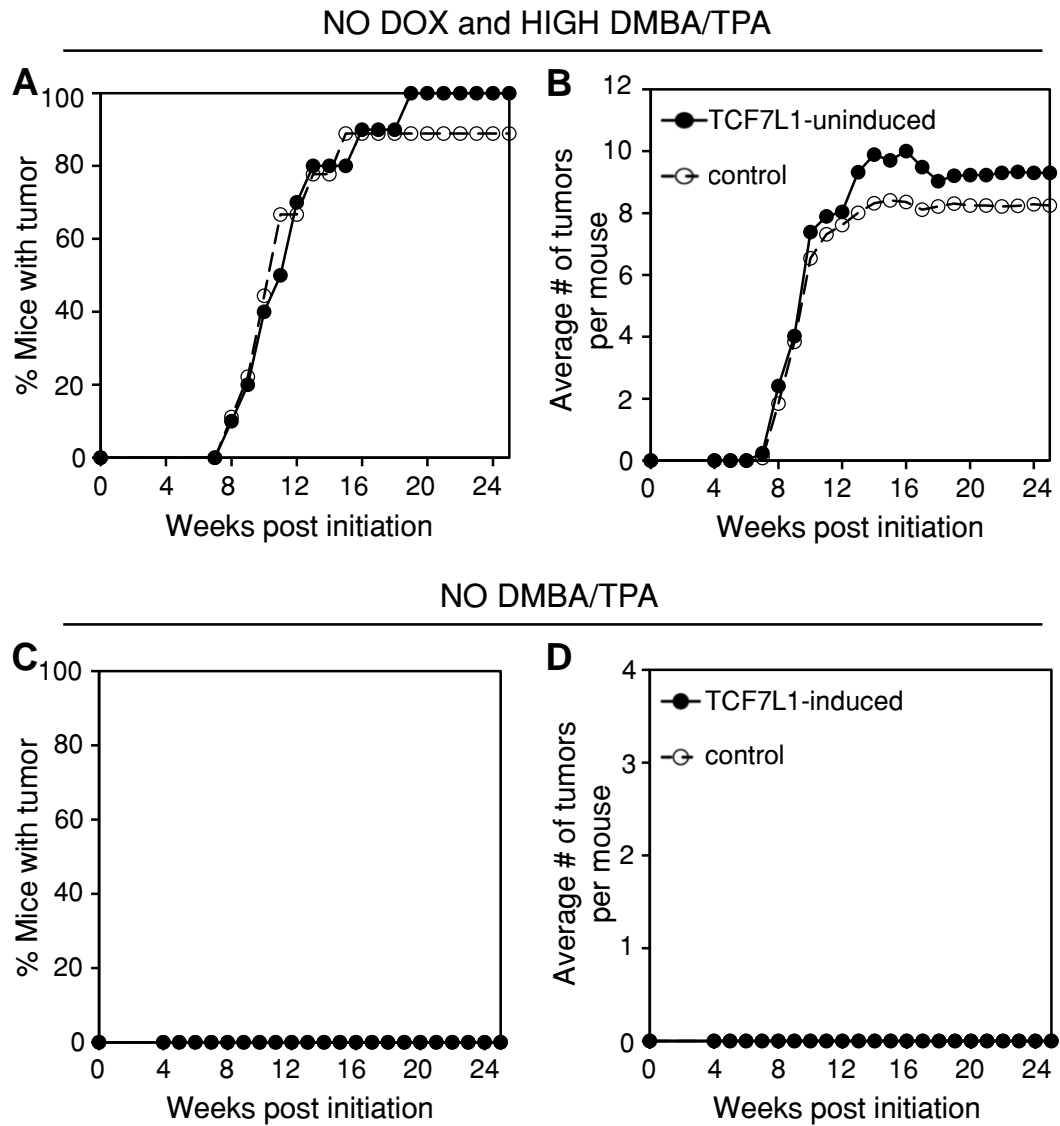

Supplement: supp [file elife-23242-supp-v1.zip › elife_poa_e23242_Figure_2_figure_supplement_3.pdf]
